# Supplementary material for: An assessment of latest Cretaceous Pycnodonte vesicularis (Lamarck, 1806) shells as records for palaeoseasonality: a multi-proxy investigation
Source: Copernicus journal article supplement (doi:10.5194/cp-14-725-2018), 2018-06-08
Supplement: Supplementary file 1 [file SI1_TEX86.xlsx]

## Sheet: Sheet1
Sample name	Depth	TEX	BIT	GDGT-index-2 (Kim et al., 2010)	TEX-h- SST	GDGT0/Cren	MI	concentraction GDGTs (ng/g)			Depth	Abundance Pycnodonte (Phygraea) vesicularis		Depth	TEX-T	P_ves_abundance	Weighing factor	Weighted TEX-T
BJ -15m	-1500	0.72718	0.183189	-0.138358	29.1363	0.153846	0.194981	2.5627			-1140	1		-1200	28.7406	0	0	27.2714
BJ -13m	-1300	0.754295	0.184026	-0.122459	30.2238	0.150691	0.14174	0.533716			-1050	5		-1195	28.6691	0	0
BJ -12m	-1200	0.717557	0.15	-0.144143	28.7406	0.196721	0.157409	0.100872			-965	7		-1190	28.5976	0	0
BJ -10m	-1000	0.651719	0.158673	-0.18594	25.8817	0.169373	0.155371	0.578089			-855	7		-1185	28.5262	0	0
BJ -9m (s2)	-900	0.669211	0.104024	-0.174437	26.6685	0.30622	0.126057	2.55297			-750	6		-1180	28.4547	0	0
BJ -7m	-700	0.672275	0.13	-0.172453	26.8042	0.203125	0.133641	3.68079			-660	4		-1175	28.3832	0	0
BJ -5m	-500	0.68484	0.136286	-0.164411	27.3543	0.248657	0.14432	0.721003			-570	5		-1170	28.3118	0	0
BJ -4m (s2)	-400	0.721424	0.15	-0.14181	28.9002	0.185792	0.156956	0.530556			-470	6		-1165	28.2403	0	0
BJ -3m	-300	0.697275	0.125468	-0.156596	27.8889	0.246847	0.143068	0.53286			-400	4		-1160	28.1688	0	0
BJ -2m	-200	0.669211	0.127986	-0.174437	26.6685	0.30622	0.126057	1.03621			-355	8		-1155	28.0973	0	0
BJ S96	-125	0.726325	0.136095	-0.138869	29.1014	0.190559	0.126183	1.81796			-300	4		-1150	28.0259	0	0
BJ -100	-100	0.722222	0.134192	-0.141329	28.9331	0.13093	0.110537	1.48728			-239	8		-1145	27.9544	0	0
BJ -80	-80	0.691264	0.144824	-0.160356	27.6316	0.164228	0.12662	1.88524			-189	6		-1140	27.8829	1	0.00070545
BJ -50	-50	0.680272	0.131344	-0.167317	27.1555	0.188589	0.136946	1.36759			-170	8		-1135	27.8115	1.22222	0.000862217
BJ -25	-25	0.668324	0.134071	-0.175013	26.6291	0.203125	0.133641	1.83616			-139	13		-1130	27.74	1.44444	0.00101898
BJ -20	-20	0.665696	0.124784	-0.176724	26.5121	0.23319	0.132249	2.20728			-89	6		-1125	27.6685	1.66667	0.00117575
BJ -11	-11	0.51312	0.0671147	-0.289781	18.779	1.77251	0.542575	1.20682			-55	16		-1120	27.597	1.88889	0.00133252
BJ 0-0.5	0.25	0.79065	0.113602	-0.102016	31.6221	0.146743	0.235193	0.86883			-49	19		-1115	27.5256	2.11111	0.00148928
BJ 7-8	7.5	0.651719	0.154904	-0.18594	25.8817	0.173375	0.137856	1.86036			-29	2		-1110	27.4541	2.33333	0.00164605
BJ 12-13	12.5	0.688926	0.144824	-0.161827	27.531	0.165854	0.12696	1.94369			-15	0		-1105	27.3826	2.55556	0.00180282
BJ 50	50	0.618987	0.142315	-0.208318	24.351	0.231242	0.138105	2.31803			-12	9		-1100	27.3112	2.77778	0.00195958
BJ 75	75	0.652507	0.167655	-0.185415	25.9176	0.196272	0.12871	2.75922			15	0		-1095	27.2397	3	0.00211635
BJ 100	100	0.630007	0.149118	-0.200655	24.8752	0.223464	0.141434	2.23697			25	0		-1090	27.1682	3.22222	0.00227312
BJ 150	150	0.760462	0.184612	-0.118922	30.4657	0.155196	0.215228	2.10548			35	0		-1085	27.0967	3.44444	0.00242988
BJ 250	250	0.67058	0.124784	-0.17355	26.7292	0.218884	0.13121	1.55801			57	0		-1080	27.0253	3.66667	0.00258665
BJ 450	450	0.679201	0.135376	-0.168002	27.1087	0.200773	0.14331	0.845672			75	0		-1075	26.9538	3.88889	0.00274342
BJ 950	950	0.693979	0.095549	-0.158654	27.7481	0.178478	0.137363	1.66096			81	0		-1070	26.8823	4.11111	0.00290019
											105	0		-1065	26.8109	4.33333	0.00305695
											115	0		-1060	26.7394	4.55556	0.00321372
											144	0		-1055	26.6679	4.77778	0.00337049
											150	0		-1050	26.5964	5	0.00352725
											175	0		-1045	26.525	5.11765	0.00361025
											176	0		-1040	26.4535	5.23529	0.00369324
											210	0		-1035	26.382	5.35294	0.00377623
											225	0		-1030	26.3106	5.47059	0.00385923
											245	0		-1025	26.2391	5.58824	0.00394222
											247	0		-1020	26.1676	5.70588	0.00402522
											292	0		-1015	26.0961	5.82353	0.00410821
											300	0		-1010	26.0247	5.94118	0.00419121
											315	1		-1005	25.9532	6.05882	0.0042742
											342	0		-1000	25.8817	6.17647	0.00435719
											385	0		-995	25.9211	6.29412	0.00444019
											391	0		-990	25.9604	6.41176	0.00452318
											400	0		-985	25.9997	6.52941	0.00460618
											440	0		-980	26.0391	6.64706	0.00468917
											485	0		-975	26.0784	6.76471	0.00477216
											500	0		-970	26.1178	6.88235	0.00485516
											530	0		-965	26.1571	7	0.00493815
											580	0		-960	26.1964	7	0.00493815
											600	0		-955	26.2358	7	0.00493815
											628	0		-950	26.2751	7	0.00493815
											685	0		-945	26.3145	7	0.00493815
											700	0		-940	26.3538	7	0.00493815
											755	0		-935	26.3931	7	0.00493815
											800	0		-930	26.4325	7	0.00493815
											840	0		-925	26.4718	7	0.00493815
											900	0		-920	26.5112	7	0.00493815
											940	0		-915	26.5505	7	0.00493815
											1000	0		-910	26.5898	7	0.00493815
											1040	0		-905	26.6292	7	0.00493815
											1100	0		-900	26.6685	7	0.00493815
											1140	0		-895	26.6719	7	0.00493815
											1200	0		-890	26.6753	7	0.00493815
											1230	0		-885	26.6787	7	0.00493815
											1300	0		-880	26.6821	7	0.00493815
											1400	0		-875	26.6855	7	0.00493815
											1500	0		-870	26.6889	7	0.00493815
											1575	0		-865	26.6923	7	0.00493815
											1625	0		-860	26.6957	7	0.00493815
											1675	0		-855	26.6991	7	0.00493815
											1725	0		-850	26.7025	6.95238	0.00490456
											1800	0		-845	26.7058	6.90476	0.00487097
											1890	0		-840	26.7092	6.85714	0.00483737
											1970	0		-835	26.7126	6.80952	0.00480378
											2055	0		-830	26.716	6.7619	0.00477019
											2145	0		-825	26.7194	6.71429	0.0047366
											2240	0		-820	26.7228	6.66667	0.004703
											2350	0		-815	26.7262	6.61905	0.00466941
											2440	0		-810	26.7296	6.57143	0.00463582
											2525	0		-805	26.733	6.52381	0.00460222
											2630	0		-800	26.7364	6.47619	0.00456863
											2750	0		-795	26.7398	6.42857	0.00453504
														-790	26.7432	6.38095	0.00450145
														-785	26.7466	6.33333	0.00446785
														-780	26.7499	6.28571	0.00443426
														-775	26.7533	6.2381	0.00440067
														-770	26.7567	6.19048	0.00436707
														-765	26.7601	6.14286	0.00433348
														-760	26.7635	6.09524	0.00429989
														-755	26.7669	6.04762	0.0042663
														-750	26.7703	6	0.0042327
														-745	26.7737	5.88889	0.00415432
														-740	26.7771	5.77778	0.00407594
														-735	26.7805	5.66667	0.00399755
														-730	26.7839	5.55556	0.00391917
														-725	26.7873	5.44444	0.00384079
														-720	26.7907	5.33333	0.0037624
														-715	26.7941	5.22222	0.00368402
														-710	26.7974	5.11111	0.00360564
														-705	26.8008	5	0.00352725
														-700	26.8042	4.88889	0.00344887
														-695	26.818	4.77778	0.00337049
														-690	26.8317	4.66667	0.0032921
														-685	26.8455	4.55556	0.00321372
														-680	26.8592	4.44444	0.00313534
														-675	26.873	4.33333	0.00305695
														-670	26.8867	4.22222	0.00297857
														-665	26.9005	4.11111	0.00290019
														-660	26.9142	4	0.0028218
														-655	26.928	4.05556	0.00286099
														-650	26.9418	4.11111	0.00290019
														-645	26.9555	4.16667	0.00293938
														-640	26.9693	4.22222	0.00297857
														-635	26.983	4.27778	0.00301776
														-630	26.9968	4.33333	0.00305695
														-625	27.0105	4.38889	0.00309614
														-620	27.0243	4.44444	0.00313534
														-615	27.038	4.5	0.00317453
														-610	27.0518	4.55556	0.00321372
														-605	27.0655	4.61111	0.00325291
														-600	27.0793	4.66667	0.0032921
														-595	27.093	4.72222	0.00333129
														-590	27.1068	4.77778	0.00337049
														-585	27.1205	4.83333	0.00340968
														-580	27.1343	4.88889	0.00344887
														-575	27.148	4.94444	0.00348806
														-570	27.1618	5	0.00352725
														-565	27.1755	5.05	0.00356252
														-560	27.1893	5.1	0.0035978
														-555	27.203	5.15	0.00363307
														-550	27.2168	5.2	0.00366834
														-545	27.2305	5.25	0.00370361
														-540	27.2443	5.3	0.00373889
														-535	27.2581	5.35	0.00377416
														-530	27.2718	5.4	0.00380943
														-525	27.2856	5.45	0.0038447
														-520	27.2993	5.5	0.00387998
														-515	27.3131	5.55	0.00391525
														-510	27.3268	5.6	0.00395052
														-505	27.3406	5.65	0.00398579
														-500	27.3543	5.7	0.00402107
														-495	27.4316	5.75	0.00405634
														-490	27.5089	5.8	0.00409161
														-485	27.5862	5.85	0.00412688
														-480	27.6635	5.9	0.00416216
														-475	27.7408	5.95	0.00419743
														-470	27.8181	6	0.0042327
														-465	27.8954	5.85714	0.00413192
														-460	27.9727	5.71429	0.00403115
														-455	28.05	5.57143	0.00393037
														-450	28.1273	5.42857	0.00382959
														-445	28.2046	5.28571	0.00372881
														-440	28.2819	5.14286	0.00362803
														-435	28.3592	5	0.00352725
														-430	28.4365	4.85714	0.00342647
														-425	28.5137	4.71429	0.00332569
														-420	28.591	4.57143	0.00322492
														-415	28.6683	4.42857	0.00312414
														-410	28.7456	4.28571	0.00302336
														-405	28.8229	4.14286	0.00292258
														-400	28.9002	4	0.0028218
														-395	28.8497	4.44444	0.00313534
														-390	28.7991	4.88889	0.00344887
														-385	28.7485	5.33333	0.0037624
														-380	28.698	5.77778	0.00407594
														-375	28.6474	6.22222	0.00438947
														-370	28.5968	6.66667	0.004703
														-365	28.5462	7.11111	0.00501654
														-360	28.4957	7.55556	0.00533007
														-355	28.4451	8	0.0056436
														-350	28.3945	7.63636	0.00538708
														-345	28.344	7.27273	0.00513055
														-340	28.2934	6.90909	0.00487402
														-335	28.2428	6.54545	0.00461749
														-330	28.1923	6.18182	0.00436097
														-325	28.1417	5.81818	0.00410444
														-320	28.0911	5.45455	0.00384791
														-315	28.0406	5.09091	0.00359138
														-310	27.99	4.72727	0.00333486
														-305	27.9394	4.36364	0.00307833
														-300	27.8889	4	0.0028218
														-295	27.8278	4.32787	0.0030531
														-290	27.7668	4.65574	0.00328439
														-285	27.7058	4.98361	0.00351569
														-280	27.6448	5.31148	0.00374698
														-275	27.5838	5.63934	0.00397828
														-270	27.5228	5.96721	0.00420957
														-265	27.4617	6.29508	0.00444087
														-260	27.4007	6.62295	0.00467216
														-255	27.3397	6.95082	0.00490346
														-250	27.2787	7.27869	0.00513475
														-245	27.2177	7.60656	0.00536605
														-240	27.1567	7.93443	0.00559734
														-235	27.0956	7.84	0.00553073
														-230	27.0346	7.64	0.00538964
														-225	26.9736	7.44	0.00524855
														-220	26.9126	7.24	0.00510746
														-215	26.8516	7.04	0.00496637
														-210	26.7906	6.84	0.00482528
														-205	26.7295	6.64	0.00468419
														-200	26.6685	6.44	0.0045431
														-195	26.8307	6.24	0.00440201
														-190	26.9929	6.04	0.00426092
														-185	27.1551	6.42105	0.00452973
														-180	27.3173	6.94737	0.00490102
														-175	27.4795	7.47368	0.00527231
														-170	27.6417	8	0.0056436
														-165	27.8038	8.80645	0.00621251
														-160	27.966	9.6129	0.00678143
														-155	28.1282	10.4194	0.00735034
														-150	28.2904	11.2258	0.00791925
														-145	28.4526	12.0323	0.00848816
														-140	28.6148	12.8387	0.00905707
														-135	28.777	12.44	0.0087758
														-130	28.9392	11.74	0.00828199
														-125	29.1014	11.04	0.00778817
														-120	29.0677	10.34	0.00729436
														-115	29.034	9.64	0.00680054
														-110	29.0004	8.94	0.00630673
														-105	28.9667	8.24	0.00581291
														-100	28.9331	7.54	0.0053191
														-95	28.6077	6.84	0.00482528
														-90	28.2824	6.14	0.00433147
														-85	27.957	7.17647	0.00506264
														-80	27.6316	8.64706	0.00610007
														-75	27.5523	10.1176	0.0071375
														-70	27.4729	11.5882	0.00817493
														-65	27.3936	13.0588	0.00921235
														-60	27.3142	14.5294	0.0102498
														-55	27.2349	16	0.0112872
														-50	27.1555	18.5	0.0130508
														-45	27.0502	15.6	0.011005
														-40	26.9449	11.35	0.00800686
														-35	26.8397	7.1	0.0050087
														-30	26.7344	2.85	0.00201053
														-25	26.6291	1.42857	0.00100779
														-20	26.5121	0.714286	0.000503893
														-15	22.2159	0	0
														-10	19.9206	8.33333	0.00587875
														-5	25.6287	6.66667	0.004703
														0	31.3367	5	0.00352725
														5	27.8612	3.33333	0.0023515
														10	26.7064	1.66667	0.00117575
														15	27.319	0	0
														20	26.895	0	0
														25	26.471	0	0
														30	26.047	0	0
														35	25.623	0	0
														40	25.199	0	0
														45	24.775	0	0
														50	24.351	0	0
														55	24.6644	0	0
														60	24.9777	0	0
														65	25.291	0	0
														70	25.6043	0	0
														75	25.9176	0	0
														80	25.7092	0	0
														85	25.5007	0	0
														90	25.2922	0	0
														95	25.0837	0	0
														100	24.8752	0	0
														105	25.4343	0	0
														110	25.9933	0	0
														115	26.5524	0	0
														120	27.1114	0	0
														125	27.6705	0	0
														130	28.2295	0	0
														135	28.7886	0	0
														140	29.3476	0	0
														145	29.9067	0	0
														150	30.4657	0	0
														155	30.2789	0	0
														160	30.0921	0	0
														165	29.9052	0	0
														170	29.7184	0	0
														175	29.5316	0	0
														180	29.3448	0	0
														185	29.1579	0	0
														190	28.9711	0	0
														195	28.7843	0	0
														200	28.5975	0	0
														205	28.4106	0	0
														210	28.2238	0	0
														215	28.037	0	0
														220	27.8502	0	0
														225	27.6633	0	0
														230	27.4765	0	0
														235	27.2897	0	0
														240	27.1029	0	0
														245	26.916	0	0
														250	26.7292	0	0
														255	26.7387	0	0
														260	26.7482	0	0
														265	26.7577	0	0
														270	26.7672	0	0
														275	26.7766	0	0
														280	26.7861	0	0
														285	26.7956	0	0
														290	26.8051	0	0
														295	26.8146	0	0
														300	26.8241	0	0
														305	26.8336	0.333333	0.00023515
														310	26.843	0.666667	0.0004703
														315	26.8525	1	0.00070545
														320	26.862	0.814815	0.000574811
														325	26.8715	0.62963	0.000444172
														330	26.881	0.444444	0.000313534
														335	26.8905	0.259259	0.000182895
														340	26.9	0.0740741	5.22556e-05
														345	26.9095	0	0
														350	26.9189	0	0
														355	26.9284	0	0
														360	26.9379	0	0
														365	26.9474	0	0
														370	26.9569	0	0
														375	26.9664	0	0
														380	26.9759	0	0
														385	26.9854	0	0
														390	26.9948	0	0
														395	27.0043	0	0
														400	27.0138	0	0
