# Supplementary material for: An assessment of latest Cretaceous Pycnodonte vesicularis (Lamarck, 1806) shells as records for palaeoseasonality: a multi-proxy investigation
Source: Copernicus journal article supplement (doi:10.5194/cp-14-725-2018), 2018-06-08
Supplement: Supplementary file 3 [file SI4_XRF.docx]

Supplementary information: Methodology and uncertainty of µXRF and IRMS measurements

µXRF mapping was done using the M4 Tornado’s Rh-anode X-Ray tube under maximum source energy settings (50kV, 600 µA) using two silicon drift detectors, a spatial pixel resolution of 50 µm and an integration time of 1 ms per pixel. µXRF line scans in growth direction on the hinges of shells M0, M4, M6 and M11 were measured on the M4 Tornado in point-by-point mode (**Figure 2;** see de Winter et al., 2017a) using maximum source energy settings (50kV, 600 µA), a spot size of 25 µm, a spatial sampling resolution of 50 µm and an integration time per point of 60 seconds (1085 measurements in total). This measurement strategy allowed XRF spectra to accumulate enough counts to reach the Time of Stable Reproducibility and Accuracy (de Winter et al., 2017b).

Analytical uncertainty of IRMS measurements was determined by repeated measurement (N = 110) of the in-house reference material MAR2 (Marbella marble, δ13C: 3.41 ± 0.05 ‰VPDB; δ18O: 0.13 ± 0.10 ‰VPDB; 1 standard deviation, SD) and the standard deviations of reproducibility were found to be 0.02‰ and 0.08‰ for δ13C and δ18O values (1 SD), respectively. This MAR2 reference material was previously calibrated using the international NBS-19 stable isotope standard (Friedman et al., 1982).

**References**

de Winter, N.J., Goderis, S., Dehairs, F., Jagt, J.W.M., Fraaije, R.H.B., Van Malderen, S.J.M., Vanhaecke, F., Claeys, P., 2017a Tropical seasonality in the late Campanian (Late Cretaceous): Comparison between multiproxy records from three bivalve taxa from Oman. Palaeogeography, Palaeoclimatology, Palaeoecology, <https://doi.org/10.1016/j.palaeo.2017.07.031>.

de Winter, N.J., Sinnesael, M., Makarona, C., Vansteenberge, S., Claeys, P., 2017b. Trace element analyses of carbonates using portable and micro-X-ray fluorescence: Performance and optimization of measurement parameters and strategies. Journal of Analytical Atomic Spectrometry.

Friedman, I., O’NEIL, J., CEBULA, G., 1982. Two New Carbonate Stable-Isotope Standards. Geostandards Newsletter 6, 11–12.
