# Supplementary material for: An assessment of latest Cretaceous Pycnodonte vesicularis (Lamarck, 1806) shells as records for palaeoseasonality: a multi-proxy investigation
Source: Copernicus journal article supplement (doi:10.5194/cp-14-725-2018), 2018-06-08
Supplement: Supplementary file 5 [file SI8_T_yearstack.xlsx]

## Sheet: M10
original data																													12.0107	15.9994	22.9897	24.305	26.9815	28.0855	30.9738	32.065	35.453	39.0983	40.078	47.867	50.942	51.9961	54.938	55.845	58.9332	58.6934	63.546	65.39	79.904
d	Spectrum	C	O	Na	Mg	Al	Si	P	S	Cl	K	Ca	Ti	V	Cr	Mn	Fe	Co	Ni	Cu	Zn	Br	Rb	Sr	Rh	Ba	Pb	trimmed	C	O	Na	Mg	Al	Si	P	S	Cl	K	Ca	Ti	V	Cr	Mn	Fe	Co	Ni	Cu	Zn	Br
0	Line_1_01	11.8188	47.9543	0.0395522	0.204774	0.0282944	0.195643	0.00172215	0.190472	0	0	39.0669	0.0146261	0	0	0.0737066	0.331592	0	0.000247763	0.00184241	0.00346187	0.00202137	0	0.0701734	0	0	0.00189193		11.8188	47.9543	0.0395522	0.204774	0.0282944	0.195643	0.00172215	0.190472			39.0669	0.0146261			0.0737066	0.331592		0.000247763	0.00184241	0.00346187	0.00202137
0.05	Line_1_02	11.8653	47.9703	0	0.170409	0.024221	0.173835	0.00111338	0.150174	0	0	39.2788	0	0	0.000578421	0.0778495	0.1923	0	0	0.00280661	0.0030729	0.00218369	0	0.0700048	0	0.0130906	0.00387668		11.8653	47.9703		0.170409	0.024221	0.173835	0.00111338	0.150174			39.2788			0.000578421	0.0778495	0.1923			0.00280661	0.0030729	0.00218369
0.1	Line_1_03	11.8441	47.949	0	0.199193	0.0244822	0.164768	0.00113213	0.16669	0	0	39.1617	0	0	0.000265435	0.106073	0.286025	0.000941311	0	0.00210996	0.00278627	0.00151363	0	0.0676624	0	0.0180574	0.003507		11.8441	47.949		0.199193	0.0244822	0.164768	0.00113213	0.16669			39.1617			0.000265435	0.106073	0.286025	0.000941311		0.00210996	0.00278627	0.00151363
0.15	Line_1_04	11.8075	47.9651	0.0254065	0.232737	0.0233706	0.177167	0.0015714	0.244737	0	0	38.9849	0.00671403	0	0.000386241	0.13658	0.311533	0	0	0.00140593	0.00217567	0.000822687	0	0.066338	0	0.0101657	0.00138322		11.8075	47.9651	0.0254065	0.232737	0.0233706	0.177167	0.0015714	0.244737			38.9849	0.00671403		0.000386241	0.13658	0.311533			0.00140593	0.00217567	0.000822687
0.2	Line_1_05	11.8221	47.9738	0	0.15783	0.0239918	0.181823	0.00194698	0.224201	0	0	39.1578	0.0591839	0	0	0.126687	0.20263	0	0	0.001151	0.00151443	0.000761139	0	0.0646197	0	0	0		11.8221	47.9738		0.15783	0.0239918	0.181823	0.00194698	0.224201			39.1578	0.0591839			0.126687	0.20263			0.001151	0.00151443	0.000761139
0.25	Line_1_06	11.8433	47.9905	0.032043	0.19792	0.0308603	0.163562	0.00171849	0.210104	0	0	39.1624	0.0412264	0.0027374	0	0.113616	0.138234	0.000576132	0.000229498	0.00218887	0.00244507	0.00120828	0	0.0645359	0	0	0.000599817		11.8433	47.9905	0.032043	0.19792	0.0308603	0.163562	0.00171849	0.210104			39.1624	0.0412264	0.0027374		0.113616	0.138234	0.000576132	0.000229498	0.00218887	0.00244507	0.00120828
0.3	Line_1_07	11.8422	47.9835	0	0.185942	0.0251776	0.139693	0.00107732	0.23017	0	0	39.178	0.0149293	0	0	0.137355	0.190109	0.000817585	0	0.00175167	0.00219841	0.00134163	0	0.0658389	0	0	0		11.8422	47.9835		0.185942	0.0251776	0.139693	0.00107732	0.23017			39.178	0.0149293			0.137355	0.190109	0.000817585		0.00175167	0.00219841	0.00134163
0.35	Line_1_08	11.8036	47.9893	0	0.190606	0.0199887	0.153113	0.000663227	0.316469	0	0	39.0418	0	0.00346075	0	0.161284	0.244149	0	0	0.00105441	0.00179154	0.00196917	0	0.0653632	0	0.00444059	0.000946227		11.8036	47.9893		0.190606	0.0199887	0.153113	0.000663227	0.316469			39.0418		0.00346075		0.161284	0.244149			0.00105441	0.00179154	0.00196917
0.4	Line_1_09	11.8215	47.9996	0	0.190012	0.0325333	0.136402	0.00162945	0.298048	0	0	39.1033	0	0.00371917	0	0.15946	0.183468	0	4.52746e-05	0.000671527	0.00209512	0.00261967	0	0.0637057	0	0.00110632	0		11.8215	47.9996		0.190012	0.0325333	0.136402	0.00162945	0.298048			39.1033		0.00371917		0.15946	0.183468		4.52746e-05	0.000671527	0.00209512	0.00261967
0.45	Line_1_10	11.813	47.9956	0	0.153969	0.0265973	0.14871	0.00181681	0.313279	0	0	39.1354	0	0	0.000168041	0.161359	0.176301	0.000482292	0	0.000197153	0.00304609	0.00227005	0	0.0611358	0	0.00678125	0		11.813	47.9956		0.153969	0.0265973	0.14871	0.00181681	0.313279			39.1354			0.000168041	0.161359	0.176301	0.000482292		0.000197153	0.00304609	0.00227005
0.5	Line_1_11	11.7786	47.9813	0	0.198439	0.0245367	0.150698	0.00168918	0.353613	0	0	38.9469	0	0	0	0.176165	0.312305	0.00248334	0.000153707	0.0016606	0.00338886	0.00186743	0	0.0618545	0	0.00220708	0.00221977		11.7786	47.9813		0.198439	0.0245367	0.150698	0.00168918	0.353613			38.9469				0.176165	0.312305	0.00248334	0.000153707	0.0016606	0.00338886	0.00186743
0.55	Line_1_12	11.766	47.9776	0	0.199711	0.0224171	0.189404	0.000712867	0.348403	0	0	38.9024	0	0	0	0.180623	0.341399	0.00156271	0	0.000220207	0.00319862	0.00133097	0	0.0627392	0	0.00141609	0.000898768		11.766	47.9776		0.199711	0.0224171	0.189404	0.000712867	0.348403			38.9024				0.180623	0.341399	0.00156271		0.000220207	0.00319862	0.00133097
0.6	Line_1_13	11.8098	48.0088	0	0.196257	0.0239673	0.196418	0.00131792	0.290068	0	0	39.0541	0.00500221	0	0	0.129831	0.213176	0.00191328	0	0.000210665	0.00315692	0.00102282	0	0.0631057	0	0.000876765	0.0010425		11.8098	48.0088		0.196257	0.0239673	0.196418	0.00131792	0.290068			39.0541	0.00500221			0.129831	0.213176	0.00191328		0.000210665	0.00315692	0.00102282
0.65	Line_1_14	11.8287	47.9854	0.00819815	0.144764	0.0236882	0.211942	0.000695976	0.21805	0	0	39.2023	0.0185856	0	0	0.0964924	0.189573	0.00253475	0	0.000405123	0.00402468	0.00119225	0	0.0625895	0	0	0.000843603		11.8287	47.9854	0.00819815	0.144764	0.0236882	0.211942	0.000695976	0.21805			39.2023	0.0185856			0.0964924	0.189573	0.00253475		0.000405123	0.00402468	0.00119225
0.7	Line_1_15	11.8711	47.9892	0	0.168053	0.0235956	0.15376	0.000816271	0.172139	0	0	39.3055	0	0	0	0.0799425	0.164307	0	0	0.00104653	0.00455973	0.00149968	0	0.0621112	0	0.00053957	0.00180698		11.8711	47.9892		0.168053	0.0235956	0.15376	0.000816271	0.172139			39.3055				0.0799425	0.164307			0.00104653	0.00455973	0.00149968
0.75	Line_1_16	11.8733	47.9857	0	0.172455	0.0311963	0.136368	0.000810005	0.172219	0	0	39.3048	0	0	0	0.0857617	0.160025	0	0	0.00103891	0.00468139	0.00147158	0	0.0645666	0	0.0037989	0.00181024		11.8733	47.9857		0.172455	0.0311963	0.136368	0.000810005	0.172219			39.3048				0.0857617	0.160025			0.00103891	0.00468139	0.00147158
0.8	Line_1_17	11.8321	47.9587	0	0.203915	0.0207861	0.0903705	0.000732969	0.250303	0	0	39.1147	0	0	0	0.117803	0.330152	0	0	0.00195564	0.00409213	0.00120502	0	0.066087	0	0.00576994	0.00128638		11.8321	47.9587		0.203915	0.0207861	0.0903705	0.000732969	0.250303			39.1147				0.117803	0.330152			0.00195564	0.00409213	0.00120502
0.85	Line_1_18	11.7942	47.9549	0	0.203535	0.0247789	0.119516	0.000801012	0.304199	0	0	38.9889	0	0.00127371	0	0.137107	0.387464	0.00105568	0	0.00225759	0.00371095	0.00153722	0	0.0653506	0	0.00719922	0.00227946		11.7942	47.9549		0.203535	0.0247789	0.119516	0.000801012	0.304199			38.9889		0.00127371		0.137107	0.387464	0.00105568		0.00225759	0.00371095	0.00153722
0.9	Line_1_19	11.8316	47.989	0	0.189309	0.0240527	0.146156	0.00107155	0.257716	0	0	39.1372	0	0.000455887	0	0.113519	0.227077	0.00115399	0.00010677	0.00305998	0.00369915	0.00181449	0	0.065361	0	0.00641822	0.00119657		11.8316	47.989		0.189309	0.0240527	0.146156	0.00107155	0.257716			39.1372		0.000455887		0.113519	0.227077	0.00115399	0.00010677	0.00305998	0.00369915	0.00181449
0.95	Line_1_20	11.8404	47.9935	0.00428109	0.171843	0.0290141	0.132185	0.00154217	0.248352	0	0	39.1961	0.021019	0	0	0.10237	0.187029	0.000114559	0	0.00256741	0.00196292	0.00131224	0	0.0642995	0	0.000751297	0.00135822		11.8404	47.9935	0.00428109	0.171843	0.0290141	0.132185	0.00154217	0.248352			39.1961	0.021019			0.10237	0.187029	0.000114559		0.00256741	0.00196292	0.00131224
1	Line_1_21	11.863	47.9781	0	0.174064	0.0242495	0.172238	0.00106181	0.152478	0	0	39.2673	0.0212551	0	0.00105144	0.0699839	0.205175	0	0.000654889	0.000940998	0.00123724	0.00148289	0	0.065108	0	0.000343041	0.000255812		11.863	47.9781		0.174064	0.0242495	0.172238	0.00106181	0.152478			39.2673	0.0212551		0.00105144	0.0699839	0.205175		0.000654889	0.000940998	0.00123724	0.00148289
1.05	Line_1_22	11.8768	47.9891	0	0.178335	0.0222134	0.13389	0.00129649	0.167181	0	0	39.3066	0.0115968	0	0.00108225	0.0696041	0.171121	0	0.00140674	0	0.00171326	0.00116097	0	0.0644459	0	0	0.00248562		11.8768	47.9891		0.178335	0.0222134	0.13389	0.00129649	0.167181			39.3066	0.0115968		0.00108225	0.0696041	0.171121		0.00140674		0.00171326	0.00116097
1.1	Line_1_23	11.8536	48.0403	0	0.178509	0.0268309	0.164335	0.00192505	0.260878	0	0	39.2297	0.00986284	0	0.00107003	0.0823929	0.0825436	0	0	0	0.00133808	0.00163231	0	0.0624667	0	0.00268981	5.45898e-06		11.8536	48.0403		0.178509	0.0268309	0.164335	0.00192505	0.260878			39.2297	0.00986284		0.00107003	0.0823929	0.0825436				0.00133808	0.00163231
1.15	Line_1_24	11.8719	48.0173	0	0.147586	0.026321	0.136492	0.00172289	0.218152	0	0	39.3401	0.0184048	0	0.000618357	0.0716107	0.07678	0	0	0	0.00137549	0.00101001	0	0.0666458	0	0.00391366	0		11.8719	48.0173		0.147586	0.026321	0.136492	0.00172289	0.218152			39.3401	0.0184048		0.000618357	0.0716107	0.07678				0.00137549	0.00101001
1.2	Line_1_25	11.8405	47.9396	0	0.133324	0.0313791	0.107829	0.00206713	0.191759	0	0	39.2582	0.0391966	0	0.000194251	0.0696459	0.314878	0.000428337	0	0	0.00151353	0.000607911	0	0.06771	0	0	0.00115534		11.8405	47.9396		0.133324	0.0313791	0.107829	0.00206713	0.191759			39.2582	0.0391966		0.000194251	0.0696459	0.314878	0.000428337			0.00151353	0.000607911
1.25	Line_1_26	11.6677	47.7281	0	0.171404	0.0275713	0.154352	0.00186865	0.217558	0	0	38.6167	0.0565687	0	0.000276103	0.0840314	1.1845	0.00203298	0	0.00052413	0.00499439	0.00099597	0	0.0723866	0	0	0.00847142		11.6677	47.7281		0.171404	0.0275713	0.154352	0.00186865	0.217558			38.6167	0.0565687		0.000276103	0.0840314	1.1845	0.00203298		0.00052413	0.00499439	0.00099597
1.3	Line_1_27	11.6456	47.6859	0	0.20521	0.0254072	0.139179	0.00064441	0.208427	0	0	38.4891	0.0724265	0	0.000671927	0.118647	1.32281	0.00117349	0	0.000661772	0.0060708	0.000633073	0	0.0681727	0	0	0.00937761		11.6456	47.6859		0.20521	0.0254072	0.139179	0.00064441	0.208427			38.4891	0.0724265		0.000671927	0.118647	1.32281	0.00117349		0.000661772	0.0060708	0.000633073
1.35	Line_1_28	11.78	47.8318	0	0.134313	0.0245223	0.130987	0.000699614	0.160593	0	0	39.0558	0.059357	0	0.000223915	0.115142	0.626136	0	0	0	0.00485564	0.000517731	0	0.0653839	0	0.00285736	0.00689328		11.78	47.8318		0.134313	0.0245223	0.130987	0.000699614	0.160593			39.0558	0.059357		0.000223915	0.115142	0.626136				0.00485564	0.000517731
1.4	Line_1_29	11.8412	47.9017	0	0.202202	0.0213306	0.139535	0.001247	0.101016	0	0	39.1473	0.0727603	0	0.000635374	0.0730395	0.417462	0	0	0	0.00442678	0.000244094	0	0.0668541	0	0	0.00901857		11.8412	47.9017		0.202202	0.0213306	0.139535	0.001247	0.101016			39.1473	0.0727603		0.000635374	0.0730395	0.417462				0.00442678	0.000244094
1.45	Line_1_30	11.8649	47.9333	0	0.283344	0.0261721	0.111766	0.000968851	0.096203	0	0	39.092	0.0534758	0	0.00105512	0.0647738	0.387327	0.00134665	0.000479949	0	0.00350401	0.0011006	0	0.0680961	0	0	0.0102232		11.8649	47.9333		0.283344	0.0261721	0.111766	0.000968851	0.096203			39.092	0.0534758		0.00105512	0.0647738	0.387327	0.00134665	0.000479949		0.00350401	0.0011006
1.5	Line_1_31	11.8647	47.9212	0	0.207228	0.0266609	0.141438	0.00109476	0.0864638	0	0	39.2173	0.0343933	0.00196816	0.000112368	0.0859618	0.332259	0.000799196	0	0.000659314	0.00238747	0.00118866	0	0.0672882	0	0	0.00689259		11.8647	47.9212		0.207228	0.0266609	0.141438	0.00109476	0.0864638			39.2173	0.0343933	0.00196816	0.000112368	0.0859618	0.332259	0.000799196		0.000659314	0.00238747	0.00118866
1.55	Line_1_32	11.8341	47.8802	0	0.172383	0.0302151	0.138674	0.00177109	0.113448	0	0	39.1713	0	0.00299843	0	0.0768294	0.481248	0.000619925	0.000598421	0.000486857	0.0020915	0.0011172	0	0.070051	0	0.012283	0.00952403		11.8341	47.8802		0.172383	0.0302151	0.138674	0.00177109	0.113448			39.1713		0.00299843		0.0768294	0.481248	0.000619925	0.000598421	0.000486857	0.0020915	0.0011172
1.6	Line_1_33	11.8341	47.8518	0	0.137864	0.0258657	0.146891	0.00139382	0.0758471	0	0	39.2281	0.00248009	0.000801679	0	0.0634199	0.541098	0.00093937	0	0.000583945	0.00196802	0.000623109	0	0.0706234	0	0.00871849	0.00682457		11.8341	47.8518		0.137864	0.0258657	0.146891	0.00139382	0.0758471			39.2281	0.00248009	0.000801679		0.0634199	0.541098	0.00093937		0.000583945	0.00196802	0.000623109
1.65	Line_1_34	11.8634	47.9108	0.0567539	0.192826	0.0289376	0.136108	0.00203439	0.0824264	0	0	39.2349	0.0280942	0	0	0.0603556	0.323125	0.00108172	0	0.000594491	0.000415888	0.00102481	0	0.0712415	0	0.00190085	0.00391568		11.8634	47.9108	0.0567539	0.192826	0.0289376	0.136108	0.00203439	0.0824264			39.2349	0.0280942			0.0603556	0.323125	0.00108172		0.000594491	0.000415888	0.00102481
1.7	Line_1_35	11.8482	47.8724	0	0.174655	0.0250036	0.136675	0.0017749	0.0627719	0	0	39.2147	0.0342001	0	0	0.0716393	0.478859	0	0.000733893	0.00154241	0.000852834	0.000660701	0	0.0701644	0	0	0.0051443		11.8482	47.8724		0.174655	0.0250036	0.136675	0.0017749	0.0627719			39.2147	0.0342001			0.0716393	0.478859		0.000733893	0.00154241	0.000852834	0.000660701
1.75	Line_1_36	11.7254	47.7347	0	0.101347	0.0235625	0.197274	0.00135712	0.112504	0	0	38.9249	0.006238	0.00122981	0.00185525	0.0738265	1.00945	0	0.000996238	0.000581093	0.00239212	0.00163264	0	0.072012	0	0.00160305	0.00715736		11.7254	47.7347		0.101347	0.0235625	0.197274	0.00135712	0.112504			38.9249	0.006238	0.00122981	0.00185525	0.0738265	1.00945		0.000996238	0.000581093	0.00239212	0.00163264
1.8	Line_1_37	11.6761	47.6857	0	0.14577	0.0227932	0.204546	0.00185416	0.122353	0	0	38.6866	0.0227554	0	0.00177563	0.0598125	1.285	0.000929336	0	0.000557813	0.00332368	0.000418939	0	0.073284	0	0	0.00647456		11.6761	47.6857		0.14577	0.0227932	0.204546	0.00185416	0.122353			38.6866	0.0227554		0.00177563	0.0598125	1.285	0.000929336		0.000557813	0.00332368	0.000418939
1.85	Line_1_38	11.7167	47.7266	0	0.106588	0.0210737	0.180915	0.00170314	0.122901	0	0	38.8888	0.0351431	0	0.00357139	0.0738674	1.03456	0.00083708	4.44995e-05	0.000742762	0.00460998	0.00113415	0	0.0689221	0	0	0.0111523		11.7167	47.7266		0.106588	0.0210737	0.180915	0.00170314	0.122901			38.8888	0.0351431		0.00357139	0.0738674	1.03456	0.00083708	4.44995e-05	0.000742762	0.00460998	0.00113415
1.9	Line_1_39	11.8245	47.9115	0	0.194457	0.0276105	0.118939	0.000579103	0.176813	0	0	39.1063	0.0121467	0	0.00591732	0.0942216	0.449727	0	0.000352507	0.00010153	0.00229157	0.000831064	0	0.0626899	0	0.00387696	0.00713623		11.8245	47.9115		0.194457	0.0276105	0.118939	0.000579103	0.176813			39.1063	0.0121467		0.00591732	0.0942216	0.449727		0.000352507	0.00010153	0.00229157	0.000831064
1.95	Line_1_40	11.9019	47.9555	0	0.156892	0.0272412	0.115066	0.000808111	0.0954012	0	0	39.4252	0.000783173	0	0.00887205	0.0714087	0.154457	0.00084121	0.00176149	0.000863134	0.00113682	0.000835579	0	0.0655292	0	0.00967354	0.00588152		11.9019	47.9555		0.156892	0.0272412	0.115066	0.000808111	0.0954012			39.4252	0.000783173		0.00887205	0.0714087	0.154457	0.00084121	0.00176149	0.000863134	0.00113682	0.000835579
2	Line_1_41	11.8922	47.9333	0	0.114145	0.0228966	0.119289	0.000294373	0.09631	0	0	39.4627	0	0	0.00939233	0.070668	0.190603	0.00239972	0.00187671	0.00118123	0.000934752	0.00083056	0	0.0671254	0	0.00715087	0.00673926		11.8922	47.9333		0.114145	0.0228966	0.119289	0.000294373	0.09631			39.4627			0.00939233	0.070668	0.190603	0.00239972	0.00187671	0.00118123	0.000934752	0.00083056
2.05	Line_1_42	11.8616	47.9475	0	0.176362	0.0302286	0.157448	0.00112526	0.130424	0	0	39.2584	0	0	0.00883224	0.0871051	0.260502	0.00114314	0.0024657	0.00105297	0.00180236	0.000372596	0	0.0661962	0	0.0028843	0.00450454		11.8616	47.9475		0.176362	0.0302286	0.157448	0.00112526	0.130424			39.2584			0.00883224	0.0871051	0.260502	0.00114314	0.0024657	0.00105297	0.00180236	0.000372596
2.1	Line_1_43	11.8663	47.9262	0	0.166016	0.0219607	0.150994	0.00132849	0.098194	0	0	39.2894	0.0123418	0	0.00679735	0.0589546	0.315144	0.00151284	0.00246175	0.000326765	0.0028371	0.00119533	0	0.0700342	0	0	0.00794491		11.8663	47.9262		0.166016	0.0219607	0.150994	0.00132849	0.098194			39.2894	0.0123418		0.00679735	0.0589546	0.315144	0.00151284	0.00246175	0.000326765	0.0028371	0.00119533
2.15	Line_1_44	11.8561	47.903	0.0970072	0.155859	0.0281089	0.139788	0.00157396	0.106749	0	0	39.2726	0	0	0.000721152	0.0833311	0.273015	0.00141141	0.00212898	0.000736497	0.00373017	0.00112579	0	0.069156	0	0	0.00388229		11.8561	47.903	0.0970072	0.155859	0.0281089	0.139788	0.00157396	0.106749			39.2726			0.000721152	0.0833311	0.273015	0.00141141	0.00212898	0.000736497	0.00373017	0.00112579
2.2	Line_1_45	11.8622	47.956	0	0.172731	0.0270656	0.155469	0.00227928	0.143797	0	0	39.2679	0.0061463	0	0.00020153	0.125542	0.21316	0	0.000370562	0.000286594	0.00159477	0.0011031	0	0.0629122	0	0	0.0011776		11.8622	47.956		0.172731	0.0270656	0.155469	0.00227928	0.143797			39.2679	0.0061463		0.00020153	0.125542	0.21316		0.000370562	0.000286594	0.00159477	0.0011031
2.25	Line_1_46	11.898	47.9985	0	0.157236	0.0213406	0.159878	0.00207339	0.130564	0	0	39.4109	0.00114377	0.00284475	0	0.0796557	0.0655392	0	0.000358771	0.000450362	0.000793968	0.00111008	0	0.0672629	0	0	0.00228506		11.898	47.9985		0.157236	0.0213406	0.159878	0.00207339	0.130564			39.4109	0.00114377	0.00284475		0.0796557	0.0655392		0.000358771	0.000450362	0.000793968	0.00111008
2.3	Line_1_47	11.9107	48.0022	0	0.149496	0.0239714	0.159135	0.00187851	0.105801	0	0	39.4652	0.0119101	0	0	0.0601612	0.0367368	9.3334e-05	0	0.000347687	0.000638658	0.00153317	0	0.0687547	0	0	0.00138975		11.9107	48.0022		0.149496	0.0239714	0.159135	0.00187851	0.105801			39.4652	0.0119101			0.0601612	0.0367368	9.3334e-05		0.000347687	0.000638658	0.00153317
2.35	Line_1_48	11.9032	47.9794	0	0.159154	0.0280077	0.160355	0.00182439	0.0817176	0	0	39.4235	0.0289911	0	0	0.0570502	0.100782	0.000812842	0	0.000493079	0.00052625	0.00147315	0	0.0706851	0	0	0.00200691		11.9032	47.9794		0.159154	0.0280077	0.160355	0.00182439	0.0817176			39.4235	0.0289911			0.0570502	0.100782	0.000812842		0.000493079	0.00052625	0.00147315
2.4	Line_1_49	11.901	47.96	0	0.151442	0.023577	0.124409	0.00168555	0.0921007	0	0	39.4297	0.0278294	0	0	0.0782695	0.13126	0.0010123	0	0.000618937	0.00129563	0.00125547	0	0.068604	0	0.00388961	0.00203657		11.901	47.96		0.151442	0.023577	0.124409	0.00168555	0.0921007			39.4297	0.0278294			0.0782695	0.13126	0.0010123		0.000618937	0.00129563	0.00125547
2.45	Line_1_50	11.8807	47.9454	0	0.14293	0.0237574	0.115177	0.00142742	0.115889	0	0	39.375	0.050713	0	0	0.0708899	0.198247	0.00305321	0	0.000844851	0.00105664	0.00159221	0	0.071028	0	0	0.00229247		11.8807	47.9454		0.14293	0.0237574	0.115177	0.00142742	0.115889			39.375	0.050713			0.0708899	0.198247	0.00305321		0.000844851	0.00105664	0.00159221
2.5	Line_1_51	11.8378	47.8737	0.00562287	0.151334	0.0270149	0.127697	0.00134356	0.0952633	0	0	39.218	0.0420181	0	0.000373498	0.0562313	0.478113	0.000524127	0.0010468	0.00289412	0.00255123	0.00188025	0	0.0713184	0	8.08807e-05	0.00511252		11.8378	47.8737	0.00562287	0.151334	0.0270149	0.127697	0.00134356	0.0952633			39.218	0.0420181		0.000373498	0.0562313	0.478113	0.000524127	0.0010468	0.00289412	0.00255123	0.00188025
2.55	Line_1_52	11.7787	47.8198	0	0.138519	0.0225824	0.113525	0.00216663	0.160224	0	0	39.0422	0.0291015	0	0	0.0762913	0.73131	0	0.000503339	0.00174434	0.00493554	0.00167101	0	0.0701547	0	0	0.00657122		11.7787	47.8198		0.138519	0.0225824	0.113525	0.00216663	0.160224			39.0422	0.0291015			0.0762913	0.73131		0.000503339	0.00174434	0.00493554	0.00167101
2.6	Line_1_53	11.6868	47.7448	0.0729021	0.0902083	0.0221155	0.141738	0.00146998	0.249905	0	0	38.8146	0.0196061	0	0.000105058	0.0988625	0.966939	0.00258731	0	0.000538373	0.00609084	0.00190202	0	0.0720983	0	0	0.00680904		11.6868	47.7448	0.0729021	0.0902083	0.0221155	0.141738	0.00146998	0.249905			38.8146	0.0196061		0.000105058	0.0988625	0.966939	0.00258731		0.000538373	0.00609084	0.00190202
2.65	Line_1_54	11.7869	47.8924	0	0.129919	0.0242704	0.111001	0.00266639	0.252721	0.00225046	0	39.0845	0.00962794	0	0.000454809	0.103641	0.516615	0.00603505	0	0.000256978	0.00381468	0.000701738	0	0.068525	0	0	0.00379278		11.7869	47.8924		0.129919	0.0242704	0.111001	0.00266639	0.252721	0.00225046		39.0845	0.00962794		0.000454809	0.103641	0.516615	0.00603505		0.000256978	0.00381468	0.000701738
2.7	Line_1_55	11.8683	47.9447	0	0.120512	0.0262947	0.118852	0.00108602	0.154995	0	0	39.3711	0	0	0	0.0646437	0.24082	0.00418567	0.00256181	0.00101722	0.00370953	0.000822642	0	0.0698651	0	0.00317319	0.00335033		11.8683	47.9447		0.120512	0.0262947	0.118852	0.00108602	0.154995			39.3711				0.0646437	0.24082	0.00418567	0.00256181	0.00101722	0.00370953	0.000822642
2.75	Line_1_56	11.9096	47.9776	0	0.139572	0.0202697	0.114402	0.00133242	0.11788	0	0	39.4782	0	0	0	0.0438159	0.0968686	0.00770126	0.00491916	0.000511033	0.00231459	0.000736192	0	0.0683155	0	0.0135269	0.00249838		11.9096	47.9776		0.139572	0.0202697	0.114402	0.00133242	0.11788			39.4782				0.0438159	0.0968686	0.00770126	0.00491916	0.000511033	0.00231459	0.000736192
2.8	Line_1_57	11.9123	47.9914	0	0.138093	0.0290821	0.110397	0.00203262	0.132522	0	0	39.4892	0	0	0	0.0444652	0.0406418	0.00792808	0.00489749	0.000712049	0.00239083	0.00120602	0	0.0694442	0	0.0208489	0.00242343		11.9123	47.9914		0.138093	0.0290821	0.110397	0.00203262	0.132522			39.4892				0.0444652	0.0406418	0.00792808	0.00489749	0.000712049	0.00239083	0.00120602
2.85	Line_1_58	11.9079	47.9846	0	0.171238	0.0287105	0.111712	0.00205648	0.128147	0	0	39.4191	0	0.00809918	0	0.0492192	0.072028	0.00650987	0.00642199	0.00094274	0.00313766	0.000817296	0	0.0712155	0	0.0246549	0.00343474		11.9079	47.9846		0.171238	0.0287105	0.111712	0.00205648	0.128147			39.4191		0.00809918		0.0492192	0.072028	0.00650987	0.00642199	0.00094274	0.00313766	0.000817296
2.9	Line_1_59	11.8891	47.917	0	0.0584941	0.0175475	0.0822973	0.00254537	0.130431	0	0	39.5414	0	0.00869569	0	0.0548251	0.176639	0.00395396	0.0059307	0.000862832	0.00331421	0.000413375	0	0.0729506	0	0.0268683	0.00678494		11.8891	47.917		0.0584941	0.0175475	0.0822973	0.00254537	0.130431			39.5414		0.00869569		0.0548251	0.176639	0.00395396	0.0059307	0.000862832	0.00331421	0.000413375
2.95	Line_1_60	11.8441	47.9177	0	0.225259	0.028022	0.144663	0.00334756	0.126509	0	0	39.1167	0	0.00219024	0.00111139	0.0546638	0.418336	0.000255952	0.00673294	0.000844505	0.00560038	0.000118536	0	0.0723037	0	0.0222879	0.00922783		11.8441	47.9177		0.225259	0.028022	0.144663	0.00334756	0.126509			39.1167		0.00219024	0.00111139	0.0546638	0.418336	0.000255952	0.00673294	0.000844505	0.00560038	0.000118536
3	Line_1_61	11.809	47.8227	0	0.124419	0.0249792	0.157761	0.00252392	0.0868237	0	0	39.1663	0	0.00115367	0.00188009	0.0543701	0.636984	0	0.00708576	0.000578965	0.00632678	0.000524517	0	0.0709811	0	0.0166662	0.00901127		11.809	47.8227		0.124419	0.0249792	0.157761	0.00252392	0.0868237			39.1663		0.00115367	0.00188009	0.0543701	0.636984		0.00708576	0.000578965	0.00632678	0.000524517
3.05	Line_1_62	11.7883	47.8176	0	0.135808	0.02591	0.130958	0.00353701	0.138774	0.00681943	0	39.0771	0	0	0.00111575	0.0762312	0.692898	0.0015287	0.00486469	0.000469591	0.0057294	0.00119104	0	0.0739968	0	0.00677951	0.0103487		11.7883	47.8176		0.135808	0.02591	0.130958	0.00353701	0.138774	0.00681943		39.0771			0.00111575	0.0762312	0.692898	0.0015287	0.00486469	0.000469591	0.0057294	0.00119104
3.1	Line_1_63	11.7362	47.7207	0.087052	0.0674628	0.0242251	0.160755	0.00291322	0.130832	0.013813	0.00929767	39.0185	0	0.000554593	0.000821972	0.138153	0.788647	0.000391614	0.00415644	0.00124923	0.00678074	0.000556199	0	0.0685818	0	0.00583072	0.0124768		11.7362	47.7207	0.087052	0.0674628	0.0242251	0.160755	0.00291322	0.130832	0.013813	0.00929767	39.0185		0.000554593	0.000821972	0.138153	0.788647	0.000391614	0.00415644	0.00124923	0.00678074	0.000556199
3.15	Line_1_64	11.6719	47.6237	0	0.132374	0.0222512	0.181435	0.00379719	0.0815138	0	0.00394291	38.6935	0	0.000455699	0.00142211	0.0827219	1.38801	0.00247906	0.0037632	0.000586872	0.00910309	0	9.15642e-06	0.0755442	0	0.00836181	0.0131317		11.6719	47.6237		0.132374	0.0222512	0.181435	0.00379719	0.0815138		0.00394291	38.6935		0.000455699	0.00142211	0.0827219	1.38801	0.00247906	0.0037632	0.000586872	0.00910309
3.2	Line_1_65	11.7609	47.7581	0	0.104475	0.019801	0.167759	0.00309004	0.103502	0	0	39.0368	0	0.00268735	0.00090322	0.0908622	0.836315	0	0.00372014	0.00049264	0.0042405	0	0	0.0753331	0	0.0229097	0.00809706		11.7609	47.7581		0.104475	0.019801	0.167759	0.00309004	0.103502			39.0368		0.00268735	0.00090322	0.0908622	0.836315		0.00372014	0.00049264	0.0042405
3.25	Line_1_66	11.8348	47.8787	0.0370235	0.177526	0.0195446	0.159607	0.00256835	0.10512	0	0	39.1682	0	0.000182164	0.00316279	0.133996	0.390525	0.000436182	0.0025371	0.000916348	0.00436075	0	0	0.063695	0	0.00986247	0.00720709		11.8348	47.8787	0.0370235	0.177526	0.0195446	0.159607	0.00256835	0.10512			39.1682		0.000182164	0.00316279	0.133996	0.390525	0.000436182	0.0025371	0.000916348	0.00436075
3.3	Line_1_67	11.8016	47.8424	0	0.159289	0.0291012	0.140668	0.00207636	0.127223	0	0	39.0849	0	0	0.00403128	0.0721562	0.642113	0.00225252	0.000186139	0.00023319	0.00482719	0	0	0.0693935	0	0.00782305	0.00971044		11.8016	47.8424		0.159289	0.0291012	0.140668	0.00207636	0.127223			39.0849			0.00403128	0.0721562	0.642113	0.00225252	0.000186139	0.00023319	0.00482719
3.35	Line_1_68	11.7531	47.787	0	0.118281	0.0264526	0.164851	0.00249052	0.141005	0	0	38.9897	0.0034743	0	0.00582677	0.0543818	0.863362	0.00364522	0	5.42338e-06	0.00446412	0	0	0.0711763	0	0.00202862	0.00878806		11.7531	47.787		0.118281	0.0264526	0.164851	0.00249052	0.141005			38.9897	0.0034743		0.00582677	0.0543818	0.863362	0.00364522		5.42338e-06	0.00446412
3.4	Line_1_69	11.7897	47.83	0.0304431	0.155442	0.0218485	0.154318	0.00281591	0.127939	0	0	39.0498	0	0	0.00426107	0.0444149	0.692636	0.00449604	0	0	0.00339675	0	0	0.0735457	0	0.0109017	0.00404039		11.7897	47.83	0.0304431	0.155442	0.0218485	0.154318	0.00281591	0.127939			39.0498			0.00426107	0.0444149	0.692636	0.00449604			0.00339675
3.45	Line_1_70	11.8451	47.8575	0	0.0699759	0.0247597	0.14045	0.00202009	0.105936	0	0	39.3748	0	0.0363533	0	0.0361304	0.380226	0.00957596	0	0	0.00340924	0	0	0.0745636	0	0.0365865	0.00258988		11.8451	47.8575		0.0699759	0.0247597	0.14045	0.00202009	0.105936			39.3748		0.0363533		0.0361304	0.380226	0.00957596			0.00340924
3.5	Line_1_71	11.8487	47.8768	0.00054328	0.128589	0.0238948	0.113873	0.00227313	0.167501	0.0232424	0	39.2905	0	0.0881567	0	0.063946	0.225329	0.0168164	0	0.0010911	0.00488926	0.000968723	0	0.0738164	0	0.0480906	0.000966999		11.8487	47.8768	0.00054328	0.128589	0.0238948	0.113873	0.00227313	0.167501	0.0232424		39.2905		0.0881567		0.063946	0.225329	0.0168164		0.0010911	0.00488926	0.000968723
3.55	Line_1_72	11.8601	47.8816	0	0.0841643	0.0212045	0.101533	0.00269026	0.134998	0.00864119	0	39.405	0	0.0153523	0	0.146114	0.230411	0.00238469	0	0.000159947	0.00400798	0.000892732	0	0.0668818	0	0.0320615	0.00189477		11.8601	47.8816		0.0841643	0.0212045	0.101533	0.00269026	0.134998	0.00864119		39.405		0.0153523		0.146114	0.230411	0.00238469		0.000159947	0.00400798	0.000892732
3.6	Line_1_73	11.8772	47.8972	0	0.066684	0.0192029	0.102792	0.00221623	0.105828	0.00179353	0	39.4883	0	0	0.00358478	0.0973972	0.245998	0	0.000194446	0.00093731	0.00302135	0.000413128	0	0.0729845	0	0.00935436	0.00477096		11.8772	47.8972		0.066684	0.0192029	0.102792	0.00221623	0.105828	0.00179353		39.4883			0.00358478	0.0973972	0.245998		0.000194446	0.00093731	0.00302135	0.000413128
3.65	Line_1_74	11.8707	47.8914	0	0.0815837	0.0232903	0.102091	0.00230174	0.0977447	0	0	39.4415	0.0150465	0	0.0027898	0.0557353	0.319709	0.000593675	0	0.00148662	0.00337169	0.00187421	0	0.0741387	0	0.00798752	0.00668956		11.8707	47.8914		0.0815837	0.0232903	0.102091	0.00230174	0.0977447			39.4415	0.0150465		0.0027898	0.0557353	0.319709	0.000593675		0.00148662	0.00337169	0.00187421
3.7	Line_1_75	11.8503	47.8904	0	0.152524	0.0195662	0.122725	0.00165762	0.0999136	0	0	39.2558	0.0436072	0	0.00457007	0.0534638	0.411354	0.00039535	0.000120226	0.00197538	0.00335309	0.0030829	0	0.0750641	0	0.00289462	0.00728821		11.8503	47.8904		0.152524	0.0195662	0.122725	0.00165762	0.0999136			39.2558	0.0436072		0.00457007	0.0534638	0.411354	0.00039535	0.000120226	0.00197538	0.00335309	0.0030829
3.75	Line_1_76	11.8737	47.8969	0	0.0798408	0.0218482	0.100378	0.00231828	0.105136	0	0	39.453	0	0	0.00629044	0.0486643	0.310256	0	0.00021815	0.00259259	0.00197294	0.0030508	0	0.0772062	0	0.0111829	0.0054085		11.8737	47.8969		0.0798408	0.0218482	0.100378	0.00231828	0.105136			39.453			0.00629044	0.0486643	0.310256		0.00021815	0.00259259	0.00197294	0.0030508
3.8	Line_1_77	11.8799	47.8964	0	0.0901604	0.0226	0.0805707	0.00243973	0.127614	0.00464897	0	39.4567	0	0.0414412	0	0.0828779	0.206096	0.000227475	0	0.00130249	0.00127601	0.00236212	0	0.0766114	0	0.0232274	0.00355954		11.8799	47.8964		0.0901604	0.0226	0.0805707	0.00243973	0.127614	0.00464897		39.4567		0.0414412		0.0828779	0.206096	0.000227475		0.00130249	0.00127601	0.00236212
3.85	Line_1_78	11.8729	47.8866	0	0.109194	0.0253911	0.110787	0.0017804	0.0953822	0.00224532	0	39.4045	0	0.0204377	0.00858834	0.0999002	0.253604	0.00110806	0.00133863	0.00143091	0.00373973	0.00275446	0	0.0710075	0	0.0245435	0.0028125		11.8729	47.8866		0.109194	0.0253911	0.110787	0.0017804	0.0953822	0.00224532		39.4045		0.0204377	0.00858834	0.0999002	0.253604	0.00110806	0.00133863	0.00143091	0.00373973	0.00275446
3.9	Line_1_79	11.9258	47.9254	0	0.0962352	0.0181192	0.0765519	0.0012568	0.0533237	0	0	39.6004	0	0.00681239	0.00621035	0.0416105	0.153181	0.00042762	0.000225161	0.000970489	0.00223843	0.00216039	0	0.0754725	0	0.0110541	0.00255271		11.9258	47.9254		0.0962352	0.0181192	0.0765519	0.0012568	0.0533237			39.6004		0.00681239	0.00621035	0.0416105	0.153181	0.00042762	0.000225161	0.000970489	0.00223843	0.00216039
3.95	Line_1_80	11.9311	47.9494	0	0.0689717	0.02433	0.0837909	0.00112476	0.0671627	0	0	39.6624	0.0275531	0.0149543	0	0.0306007	0.0533266	0.000513486	0	0.00174177	0.00333548	0.00229342	0	0.0772839	0	0	0		11.9311	47.9494		0.0689717	0.02433	0.0837909	0.00112476	0.0671627			39.6624	0.0275531	0.0149543		0.0306007	0.0533266	0.000513486		0.00174177	0.00333548	0.00229342
4	Line_1_81	11.9202	47.9507	0	0.079778	0.0183841	0.0904885	0.00209246	0.0648093	0	0	39.6075	0.103695	0.000568826	0.000814014	0.0338532	0.03544	0.00142091	6.18968e-06	0.00130183	0.00129661	0.000682198	0	0.0786681	0	0.0081291	0.000123148		11.9202	47.9507		0.079778	0.0183841	0.0904885	0.00209246	0.0648093			39.6075	0.103695	0.000568826	0.000814014	0.0338532	0.03544	0.00142091	6.18968e-06	0.00130183	0.00129661	0.000682198
4.05	Line_1_82	11.9197	47.9374	0	0.0464444	0.0240231	0.0823349	0.00223023	0.0640827	0	0	39.661	0.0804196	0	9.16712e-06	0.0360066	0.0559574	0.000649977	0.00226786	0.00341084	0.00206012	0.000349592	0.000214521	0.0779682	0	0.00327788	0.000230876		11.9197	47.9374		0.0464444	0.0240231	0.0823349	0.00223023	0.0640827			39.661	0.0804196		9.16712e-06	0.0360066	0.0559574	0.000649977	0.00226786	0.00341084	0.00206012	0.000349592
4.1	Line_1_83	11.8817	47.9572	0	0.0906788	0.0210234	0.107226	0.000896572	0.153266	0	0	39.4599	0.0303777	0	0	0.0401315	0.164526	0.00144908	0	0.00368039	0.00450215	0.000770426	0	0.0809177	0	0	0.00181173		11.8817	47.9572		0.0906788	0.0210234	0.107226	0.000896572	0.153266			39.4599	0.0303777			0.0401315	0.164526	0.00144908		0.00368039	0.00450215	0.000770426
4.15	Line_1_84	11.8807	47.9144	0	0.110643	0.0237762	0.106231	0.000948788	0.106579	0	0	39.4246	0	0	0	0.0758063	0.255053	0.00456284	0.000418471	0.00148596	0.00370906	0.00255552	0	0.0791696	0	0.00800949	0.00133446		11.8807	47.9144		0.110643	0.0237762	0.106231	0.000948788	0.106579			39.4246				0.0758063	0.255053	0.00456284	0.000418471	0.00148596	0.00370906	0.00255552
4.2	Line_1_85	11.9249	47.9105	0	0.0895043	0.0246796	0.123715	0.00198783	0	0	0	39.6063	0	0	0.00231619	0.0433449	0.174951	0.00210699	0	0	0.00242575	0.00159779	0	0.0807539	0	0.0105618	0.000299912		11.9249	47.9105		0.0895043	0.0246796	0.123715	0.00198783				39.6063			0.00231619	0.0433449	0.174951	0.00210699			0.00242575	0.00159779
4.25	Line_1_86	11.9272	47.9203	0.0918473	0.116194	0.0191851	0.133439	0.00292025	0	0	0	39.569	0.000619379	0	0.00141081	0.0279045	0.0974739	0.00265319	0.00050069	0.000249145	0.00218615	0.00134317	0	0.0828066	0	0	0.00275246		11.9272	47.9203	0.0918473	0.116194	0.0191851	0.133439	0.00292025				39.569	0.000619379		0.00141081	0.0279045	0.0974739	0.00265319	0.00050069	0.000249145	0.00218615	0.00134317
4.3	Line_1_87	11.9479	47.9589	0	0.136278	0.0242347	0.104576	0.00330235	0.0242506	0	0	39.605	0	0.00672826	0.000373654	0.0391832	0.0390424	0.00236005	0.00180299	0.000493553	0.00277238	0.0016616	0	0.0822526	0	0.0168804	0.0020524		11.9479	47.9589		0.136278	0.0242347	0.104576	0.00330235	0.0242506			39.605		0.00672826	0.000373654	0.0391832	0.0390424	0.00236005	0.00180299	0.000493553	0.00277238	0.0016616
4.35	Line_1_88	11.948	47.962	0	0.161682	0.0265244	0.109164	0.00250101	0.0211572	0	0	39.5654	0	0.00536014	0	0.0344199	0.0401466	0.00464867	0	0.000598738	0.00744468	0.000812168	0	0.0779454	0	0.030604	0.00166652		11.948	47.962		0.161682	0.0265244	0.109164	0.00250101	0.0211572			39.5654		0.00536014		0.0344199	0.0401466	0.00464867		0.000598738	0.00744468	0.000812168
4.4	Line_1_89	11.9439	47.9831	0	0.175574	0.0264759	0.143957	0.00211286	0.0195075	0	0	39.5309	0	0	0.00173898	0.0301215	0.0511563	0.00479244	0.000185942	9.7991e-05	0.00365154	0.000244633	0	0.0738175	0	0.00689973	0.00176833		11.9439	47.9831		0.175574	0.0264759	0.143957	0.00211286	0.0195075			39.5309			0.00173898	0.0301215	0.0511563	0.00479244	0.000185942	9.7991e-05	0.00365154	0.000244633
4.45	Line_1_90	11.9164	47.9631	0	0.125986	0.027277	0.136736	0.00149116	0.0536534	0	0	39.5211	0.0433141	0	0	0.0398882	0.092863	0.00232434	0	0	0.00110014	0.00179903	0	0.0729558	0	0	0		11.9164	47.9631		0.125986	0.027277	0.136736	0.00149116	0.0536534			39.5211	0.0433141			0.0398882	0.092863	0.00232434			0.00110014	0.00179903
4.5	Line_1_91	11.8715	47.9225	0.117495	0.166095	0.0174127	0.113567	0.000603967	0.117058	0	0	39.3059	0.00132516	0	0	0.0431117	0.246301	0.00105273	0	0.000240275	0.00232407	0.00169507	0	0.0717508	0	0	0		11.8715	47.9225	0.117495	0.166095	0.0174127	0.113567	0.000603967	0.117058			39.3059	0.00132516			0.0431117	0.246301	0.00105273		0.000240275	0.00232407	0.00169507
4.55	Line_1_92	11.7967	47.9164	0.0239499	0.0996538	0.0237415	0.111866	0.00119778	0.265912	0	0	39.1652	0.0246979	0	0	0.0629573	0.421713	0	0	0.00120646	0.00654572	0.00139508	0	0.0729865	0	0.000139886	0.00383902		11.7967	47.9164	0.0239499	0.0996538	0.0237415	0.111866	0.00119778	0.265912			39.1652	0.0246979			0.0629573	0.421713			0.00120646	0.00654572	0.00139508
4.6	Line_1_93	11.8344	47.9301	0	0.0861521	0.0225191	0.11119	0.00103515	0.1893	0	0	39.3128	0.120142	0	0.000308991	0.0594823	0.2481	0	0	0.00159309	0.00575937	0.00062334	0	0.0740495	0	0	0.00238746		11.8344	47.9301		0.0861521	0.0225191	0.11119	0.00103515	0.1893			39.3128	0.120142		0.000308991	0.0594823	0.2481			0.00159309	0.00575937	0.00062334
4.65	Line_1_94	11.8737	47.9338	0	0.06356	0.0201216	0.0994906	0.0019328	0.140482	0.00592089	0	39.482	0.0875747	0	0.00250374	0.0714406	0.135409	0.000561911	0	0.00160763	0.00514005	0	0	0.0720629	0	0.00134554	0.00144284		11.8737	47.9338		0.06356	0.0201216	0.0994906	0.0019328	0.140482	0.00592089		39.482	0.0875747		0.00250374	0.0714406	0.135409	0.000561911		0.00160763	0.00514005
4.7	Line_1_95	11.9207	47.9717	0	0.124569	0.0248971	0.0809344	0.0021634	0.0956061	0.00818332	0	39.5385	0.0626572	0	0.002155	0.052658	0.0342221	0.00132333	0	0.00101287	0.0038605	0.0010499	0.000178503	0.0712274	0	0.00197031	0.000467911		11.9207	47.9717		0.124569	0.0248971	0.0809344	0.0021634	0.0956061	0.00818332		39.5385	0.0626572		0.002155	0.052658	0.0342221	0.00132333		0.00101287	0.0038605	0.0010499
4.75	Line_1_96	11.9253	47.9477	0	0.0645005	0.0256859	0.0874499	0.00253034	0.0546733	0.00728946	0	39.651	0.109963	0	0.00300048	0.0219919	0.0029152	0.00838646	0	0.00157452	0.00549528	0.00126182	0	0.0757394	0	0	0.00353345		11.9253	47.9477		0.0645005	0.0256859	0.0874499	0.00253034	0.0546733	0.00728946		39.651	0.109963		0.00300048	0.0219919	0.0029152	0.00838646		0.00157452	0.00549528	0.00126182
4.8	Line_1_97	11.9314	47.9532	0	0.0832893	0.0251451	0.108073	0.00303919	0.053919	0.0136548	0	39.6413	0.0491878	0.000794984	0.00304651	0.0192057	0	0.0187243	0	0.00148645	0.00731934	0.00296105	0	0.0740095	0	0.0034434	0.00676738		11.9314	47.9532		0.0832893	0.0251451	0.108073	0.00303919	0.053919	0.0136548		39.6413	0.0491878	0.000794984	0.00304651	0.0192057		0.0187243		0.00148645	0.00731934	0.00296105
4.85	Line_2_001	11.935	47.9711	0	0.131209	0.0250217	0.111097	0.00222008	0.0545647	0.00700875	0	39.5738	0.0495801	0	0.00361015	0.0195996	0.000603521	0.0219743	0	0.00225672	0.00730832	0.00258726	0	0.0744905	0	0	0.00696487		11.935	47.9711		0.131209	0.0250217	0.111097	0.00222008	0.0545647	0.00700875		39.5738	0.0495801		0.00361015	0.0195996	0.000603521	0.0219743		0.00225672	0.00730832	0.00258726
4.9	Line_2_002	11.935	47.9711	0	0.147818	0.025505	0.114673	0.0022136	0.0541605	0.00636872	0	39.547	0.0404687	0.00343833	0.00164437	0.0192752	0.00403726	0.0206391	0	0.00063243	0.00817626	0.00210093	0	0.0734925	0	0.0121792	0.0101618		11.935	47.9711		0.147818	0.025505	0.114673	0.0022136	0.0541605	0.00636872		39.547	0.0404687	0.00343833	0.00164437	0.0192752	0.00403726	0.0206391		0.00063243	0.00817626	0.00210093
4.95	Line_2_003	11.9353	47.9586	0.00156472	0.111186	0.0256363	0.0961903	0.00272147	0.0608618	0.0115453	0	39.6071	0.0347844	0.00412349	0.000159621	0.0217658	0.00433584	0.0159961	0	0.000543782	0.00799346	0.00221428	0	0.0761917	0	0.00829219	0.0129379		11.9353	47.9586	0.00156472	0.111186	0.0256363	0.0961903	0.00272147	0.0608618	0.0115453		39.6071	0.0347844	0.00412349	0.000159621	0.0217658	0.00433584	0.0159961		0.000543782	0.00799346	0.00221428
5	Line_2_004	11.9389	47.9706	0	0.130827	0.0220262	0.0891071	0.0021866	0.0751987	0.00756879	0	39.5852	0.0152774	0.0036469	0	0.0250719	0.00559485	0.0172326	0	0.000844287	0.00838069	0.00245242	0	0.0799482	0	0.00877844	0.0110556		11.9389	47.9706		0.130827	0.0220262	0.0891071	0.0021866	0.0751987	0.00756879		39.5852	0.0152774	0.0036469		0.0250719	0.00559485	0.0172326		0.000844287	0.00838069	0.00245242
5.05	Line_2_005	11.9155	47.9653	0	0.0847153	0.0225653	0.0987834	0.00260336	0.109883	0.00270366	0	39.5841	0.0502603	0.00218799	0	0.0253564	0.00670831	0.0210727	0	0.00175817	0.0112097	0.00183727	0	0.0777951	0	0.00544152	0.0101532		11.9155	47.9653		0.0847153	0.0225653	0.0987834	0.00260336	0.109883	0.00270366		39.5841	0.0502603	0.00218799		0.0253564	0.00670831	0.0210727		0.00175817	0.0112097	0.00183727
5.1	Line_2_006	11.8679	48.0007	0	0.0996009	0.0267512	0.138488	0.00223168	0.216327	0	0	39.4009	0.082633	0.00278357	0	0.0228168	0.00149136	0.0308125	0	0.00087203	0.00724366	0.00211954	0	0.0776205	0	0.00414484	0.0145355		11.8679	48.0007		0.0996009	0.0267512	0.138488	0.00223168	0.216327			39.4009	0.082633	0.00278357		0.0228168	0.00149136	0.0308125		0.00087203	0.00724366	0.00211954
5.15	Line_2_007	11.88	48.0283	0	0.168602	0.0234732	0.148096	0.00206885	0.213139	0	0	39.3277	0.0477203	0.00624394	0	0.0233194	0	0.0238653	0.000505761	0.000424179	0.00446365	0.00217081	0	0.076804	0	0.0131887	0.00994085		11.88	48.0283		0.168602	0.0234732	0.148096	0.00206885	0.213139			39.3277	0.0477203	0.00624394		0.0233194		0.0238653	0.000505761	0.000424179	0.00446365	0.00217081
5.2	Line_2_008	11.9251	47.9954	0	0.123143	0.0278045	0.119768	0.00220838	0.110196	0.00885268	0	39.5529	0.00324135	0.00189653	0.000689559	0.0243796	0	0.0130361	0.00429147	0.000431669	0.000380093	0.000820269	0	0.0772292	0	0.00295377	0.00530451		11.9251	47.9954		0.123143	0.0278045	0.119768	0.00220838	0.110196	0.00885268		39.5529	0.00324135	0.00189653	0.000689559	0.0243796		0.0130361	0.00429147	0.000431669	0.000380093	0.000820269
5.25	Line_2_009	11.9313	48.0228	0	0.195663	0.0257963	0.133873	0.00246203	0.10033	0.00967771	0	39.4547	0.00687968	0	0	0.0209944	0	0.0024778	0.0100099	0.00192727	0.000137411	0	0	0.0761575	0	0	0.00474115		11.9313	48.0228		0.195663	0.0257963	0.133873	0.00246203	0.10033	0.00967771		39.4547	0.00687968			0.0209944		0.0024778	0.0100099	0.00192727	0.000137411
5.3	Line_2_010	11.9101	47.9913	0.082047	0.163894	0.0250743	0.139261	0.00243054	0.110784	0.0142075	0	39.4365	0.0120664	0	1.6203e-05	0.0254553	0	0	0.00714423	0.000275977	0.000376953	0	0	0.0755935	0	0	0.00352063		11.9101	47.9913	0.082047	0.163894	0.0250743	0.139261	0.00243054	0.110784	0.0142075		39.4365	0.0120664		1.6203e-05	0.0254553			0.00714423	0.000275977	0.000376953
5.35	Line_2_011	11.9128	48.0107	0.00379171	0.155158	0.0249189	0.162045	0.00211255	0.108543	0.0117599	0	39.4597	0.0311503	0	0.000653156	0.0304341	0.000175647	0.000339491	0.00389445	0.000104781	0.000178617	0	0	0.0761272	0	0	0.00544866		11.9128	48.0107	0.00379171	0.155158	0.0249189	0.162045	0.00211255	0.108543	0.0117599		39.4597	0.0311503		0.000653156	0.0304341	0.000175647	0.000339491	0.00389445	0.000104781	0.000178617
5.4	Line_2_012	11.903	47.9857	0	0.0908665	0.0295764	0.174451	0.00225272	0.0975159	0.0120838	0	39.5327	0.0480689	0	0.00690626	0.028383	0.00163536	0.00163209	0.000226441	0.00120065	0.000208407	0	0	0.0769121	0	0	0.00673711		11.903	47.9857		0.0908665	0.0295764	0.174451	0.00225272	0.0975159	0.0120838		39.5327	0.0480689		0.00690626	0.028383	0.00163536	0.00163209	0.000226441	0.00120065	0.000208407
5.45	Line_2_013	11.9103	47.9727	0.00870487	0.0796023	0.0267335	0.161988	0.00309705	0.0809581	0.0158858	0	39.576	0.0344441	0	0.0192563	0.0199235	0.00383929	0.00110378	0.000388538	0.00205953	0.000109859	0	0	0.0760387	0	0	0.00693104		11.9103	47.9727	0.00870487	0.0796023	0.0267335	0.161988	0.00309705	0.0809581	0.0158858		39.576	0.0344441		0.0192563	0.0199235	0.00383929	0.00110378	0.000388538	0.00205953	0.000109859
5.5	Line_2_014	11.9146	47.9749	0	0.0753146	0.0246149	0.164871	0.00254105	0.0791984	0.0199694	0	39.5971	0.0168232	0	0.021735	0.0120785	0.0103493	0.000453425	0.00150051	0.0025918	0.00053195	0	0	0.076616	0	0	0.0041822		11.9146	47.9749		0.0753146	0.0246149	0.164871	0.00254105	0.0791984	0.0199694		39.5971	0.0168232		0.021735	0.0120785	0.0103493	0.000453425	0.00150051	0.0025918	0.00053195
5.55	Line_2_015	11.9291	47.9876	0	0.110394	0.0198162	0.101578	0.00291452	0.10117	0.0108778	0	39.5885	0.00602611	0	0.0240544	0.0155299	0.0156584	0.000234892	0.00174257	0.00199969	0.00140159	0	0	0.0749823	0	0.00145092	0.00490998		11.9291	47.9876		0.110394	0.0198162	0.101578	0.00291452	0.10117	0.0108778		39.5885	0.00602611		0.0240544	0.0155299	0.0156584	0.000234892	0.00174257	0.00199969	0.00140159
5.6	Line_2_016	11.9131	47.9726	0	0.0929315	0.0243279	0.111271	0.00223845	0.108415	0.00190068	0	39.5633	0.00835016	0.00282464	0.0146979	0.0264612	0.0703503	0.00202909	0.000677396	0.000799081	0.00496885	0.00043843	0	0.0761367	0	0	0.00224751		11.9131	47.9726		0.0929315	0.0243279	0.111271	0.00223845	0.108415	0.00190068		39.5633	0.00835016	0.00282464	0.0146979	0.0264612	0.0703503	0.00202909	0.000677396	0.000799081	0.00496885	0.00043843
5.65	Line_2_017	11.8917	47.9249	0	0.13917	0.0265386	0.119018	0.00211876	0.0768762	0	0	39.4154	0	0	0.00521306	0.0396571	0.251762	0.00334381	0.000729753	0.00109219	0.00915792	0.000820814	0	0.0766717	0	0.0109552	0.0047735		11.8917	47.9249		0.13917	0.0265386	0.119018	0.00211876	0.0768762			39.4154			0.00521306	0.0396571	0.251762	0.00334381	0.000729753	0.00109219	0.00915792	0.000820814
5.7	Line_2_018	11.8258	47.8497	0.00852812	0.123035	0.0235881	0.127338	0.00248911	0.115493	0	0	39.2218	0	0.00323437	0.000383191	0.0723603	0.512398	0.00414681	0	0.00202837	0.0101089	0.000388303	0	0.0775089	0	0.0156243	0.0040666		11.8258	47.8497	0.00852812	0.123035	0.0235881	0.127338	0.00248911	0.115493			39.2218		0.00323437	0.000383191	0.0723603	0.512398	0.00414681		0.00202837	0.0101089	0.000388303
5.75	Line_2_019	11.8054	47.8226	0	0.0900779	0.0266287	0.119471	0.00233502	0.132935	0.000724412	0	39.2088	0.00619706	0	4.42699e-05	0.128294	0.557837	0.00476256	0	0.00257445	0.00879837	0.000153578	0	0.0756082	0	0	0.00684697		11.8054	47.8226		0.0900779	0.0266287	0.119471	0.00233502	0.132935	0.000724412		39.2088	0.00619706		4.42699e-05	0.128294	0.557837	0.00476256		0.00257445	0.00879837	0.000153578
5.8	Line_2_020	11.8327	47.864	0	0.157534	0.0326171	0.145468	0.00237232	0.078558	0	0	39.1881	0.040611	0	0.000750892	0.0796735	0.490384	0	0	0.00216382	0.00451994	0.000106147	0	0.0766725	0	0	0.00377498		11.8327	47.864		0.157534	0.0326171	0.145468	0.00237232	0.078558			39.1881	0.040611		0.000750892	0.0796735	0.490384			0.00216382	0.00451994	0.000106147
5.85	Line_2_021	11.8845	47.9107	0	0.170106	0.0283449	0.122424	0.00265595	0.0512849	0	0	39.3373	0.0351734	0	0.000892451	0.0513981	0.308113	0.00156193	0	0.00321181	0.00389866	0.000464738	0	0.0835458	0	0	0.00428941		11.8845	47.9107		0.170106	0.0283449	0.122424	0.00265595	0.0512849			39.3373	0.0351734		0.000892451	0.0513981	0.308113	0.00156193		0.00321181	0.00389866	0.000464738
5.9	Line_2_022	11.932	47.9485	0	0.136851	0.0273149	0.121197	0.00243727	0.0205264	0	0	39.5499	0.0107502	0	0.000193892	0.0500755	0.109651	0	0	0.00109523	0.00122859	0.000458228	0	0.0849342	0	0	0.00286101		11.932	47.9485		0.136851	0.0273149	0.121197	0.00243727	0.0205264			39.5499	0.0107502		0.000193892	0.0500755	0.109651			0.00109523	0.00122859	0.000458228
5.95	Line_2_023	11.9373	47.9811	0	0.137438	0.0254865	0.10941	0.00400242	0.0667861	0	0.00229356	39.568	0	0.000120154	0.000561542	0.0527146	0.0165031	0.00166511	0.000226361	0.000777954	0.000723384	0.000300076	0	0.0819259	0	0.0100908	0.00254036		11.9373	47.9811		0.137438	0.0254865	0.10941	0.00400242	0.0667861		0.00229356	39.568		0.000120154	0.000561542	0.0527146	0.0165031	0.00166511	0.000226361	0.000777954	0.000723384	0.000300076
6	Line_2_024	11.9536	47.9641	0	0.120116	0.0217098	0.101217	0.00308769	0.0222474	0	0.0111314	39.6506	0	0.000413585	0	0.0525704	0.0125981	0.00104419	0	2.86934e-06	0.00147502	0.000689187	0	0.0826007	0	0	0.000740379		11.9536	47.9641		0.120116	0.0217098	0.101217	0.00308769	0.0222474		0.0111314	39.6506		0.000413585		0.0525704	0.0125981	0.00104419		2.86934e-06	0.00147502	0.000689187
6.05	Line_2_025	11.9412	47.9401	0.0335703	0.0914511	0.0223743	0.104496	0.00350192	0.0262033	0	0.0161604	39.6568	0	0.00548	0.00129808	0.047267	0.0170107	0.00153894	0.00113432	8.29072e-06	0.00182355	0.00103695	0	0.0821537	0	0.00460571	0.000811686		11.9412	47.9401	0.0335703	0.0914511	0.0223743	0.104496	0.00350192	0.0262033		0.0161604	39.6568		0.00548	0.00129808	0.047267	0.0170107	0.00153894	0.00113432	8.29072e-06	0.00182355	0.00103695
6.1	Line_2_026	11.9191	47.9503	0	0.0850244	0.0263241	0.10258	0.00639134	0.0943827	0.033836	0.0107629	39.5971	0	0.0093553	0.00353574	0.0462455	0.0226138	0.00269819	0.00286691	0.000126687	0.0028762	0.00079486	0	0.0746782	0	0.00749323	0.000845573		11.9191	47.9503		0.0850244	0.0263241	0.10258	0.00639134	0.0943827	0.033836	0.0107629	39.5971		0.0093553	0.00353574	0.0462455	0.0226138	0.00269819	0.00286691	0.000126687	0.0028762	0.00079486
6.15	Line_2_027	11.924	47.9596	0.0356745	0.143657	0.0287101	0.0815772	0.00578799	0.0932771	0.0283421	0.00954066	39.5186	0	0.00538279	0.00238688	0.0471531	0.0283803	0.00357914	0.00204372	0.0004428	0.00307625	0.000589668	0	0.0702805	0	0.00688504	0.00102511		11.924	47.9596	0.0356745	0.143657	0.0287101	0.0815772	0.00578799	0.0932771	0.0283421	0.00954066	39.5186		0.00538279	0.00238688	0.0471531	0.0283803	0.00357914	0.00204372	0.0004428	0.00307625	0.000589668
6.2	Line_2_028	11.9102	47.959	0.0847462	0.161895	0.0251898	0.100451	0.00456848	0.105016	0.0174505	0.0157904	39.4427	0	0.00342914	0.00203426	0.0458516	0.0336459	0.00227318	0.00182209	0.000508598	0.000980282	0.00040453	0	0.0700715	0	0.0109958	0.000897175		11.9102	47.959	0.0847462	0.161895	0.0251898	0.100451	0.00456848	0.105016	0.0174505	0.0157904	39.4427		0.00342914	0.00203426	0.0458516	0.0336459	0.00227318	0.00182209	0.000508598	0.000980282	0.00040453
6.25	Line_2_029	11.9263	47.9842	0	0.146769	0.0311497	0.096262	0.00376265	0.103725	0.0106601	0.0155039	39.5212	0	0.0042267	0.00403087	0.049877	0.0121048	0.0014521	0.000285612	0.000520662	0.000208207	0.000484872	0	0.0705729	0	0.0143542	0.00233975		11.9263	47.9842		0.146769	0.0311497	0.096262	0.00376265	0.103725	0.0106601	0.0155039	39.5212		0.0042267	0.00403087	0.049877	0.0121048	0.0014521	0.000285612	0.000520662	0.000208207	0.000484872
6.3	Line_2_030	11.9319	47.9698	0	0.0903865	0.026259	0.0904815	0.00303692	0.0858532	0.000965652	0.00207542	39.6333	0	0.000776751	0.00551656	0.0555413	0.0177931	0.00132364	0.00140401	0.00235803	4.15908e-05	0.000524049	0	0.0694477	0	0.00975343	0.00149651		11.9319	47.9698		0.0903865	0.026259	0.0904815	0.00303692	0.0858532	0.000965652	0.00207542	39.6333		0.000776751	0.00551656	0.0555413	0.0177931	0.00132364	0.00140401	0.00235803	4.15908e-05	0.000524049
6.35	Line_2_031	11.9329	47.9892	0	0.144176	0.0272104	0.0961126	0.00185265	0.0898794	0	0	39.5491	0	0	0.00418118	0.0567875	0.0287872	0.000322178	0	0.000567199	0.00103548	0.000290492	0	0.0671011	0	0.00902822	0.00150422		11.9329	47.9892		0.144176	0.0272104	0.0961126	0.00185265	0.0898794			39.5491			0.00418118	0.0567875	0.0287872	0.000322178		0.000567199	0.00103548	0.000290492
6.4	Line_2_032	11.9387	47.9858	0	0.14141	0.0177104	0.0676232	0.00261565	0.0969619	0	0	39.5738	0	0	0.00089653	0.0616724	0.036452	0.00148413	0	0.00121225	0.00176005	0.000475103	0	0.0648316	0	0.00586508	0.000853773		11.9387	47.9858		0.14141	0.0177104	0.0676232	0.00261565	0.0969619			39.5738			0.00089653	0.0616724	0.036452	0.00148413		0.00121225	0.00176005	0.000475103
6.45	Line_2_033	11.9253	47.986	0	0.182113	0.0273136	0.104067	0.00252291	0.0843291	0	0	39.463	0	0	0.000405139	0.0692004	0.0843696	0.000553624	0	0.00134437	0.00210381	0.000261447	0	0.0631561	0	0.00393527	0		11.9253	47.986		0.182113	0.0273136	0.104067	0.00252291	0.0843291			39.463			0.000405139	0.0692004	0.0843696	0.000553624		0.00134437	0.00210381	0.000261447
6.5	Line_2_034	11.8246	47.861	0	0.14341	0.0291117	0.134998	0.00190985	0.114381	0	0	39.1904	0	0	0.000192931	0.0929694	0.52269	0.000889714	0	0.00177922	0.00349492	0.000283444	0.000246722	0.0634547	0	0.0129214	0.0012853		11.8246	47.861		0.14341	0.0291117	0.134998	0.00190985	0.114381			39.1904			0.000192931	0.0929694	0.52269	0.000889714		0.00177922	0.00349492	0.000283444
6.55	Line_2_035	11.7207	47.7983	0.0420022	0.178861	0.0228243	0.137555	0.00241115	0.240955	0	0	38.7856	0	0	0	0.143588	0.837329	0.0018576	0	0.000842282	0.00416588	0.000766342	0	0.0628574	0	0.0139772	0.00534996		11.7207	47.7983	0.0420022	0.178861	0.0228243	0.137555	0.00241115	0.240955			38.7856				0.143588	0.837329	0.0018576		0.000842282	0.00416588	0.000766342
6.6	Line_2_036	11.7149	47.7702	0	0.150937	0.0218627	0.131733	0.0020933	0.217634	0	0	38.813	0	0	0	0.118597	0.977174	0.000109475	0	0.000299488	0.004788	0.000683444	0	0.0612932	0	0.0121897	0.00250494		11.7149	47.7702		0.150937	0.0218627	0.131733	0.0020933	0.217634			38.813				0.118597	0.977174	0.000109475		0.000299488	0.004788	0.000683444
6.65	Line_2_037	11.3561	47.229	0	0.162784	0.0267012	0.239873	0.00247152	0.141512	0	0.0123439	37.5923	0	0	0.000504646	0.100416	3.02092	0.00151396	0	0.000354318	0.0104372	0.000226283	0	0.0701704	0	0.0130377	0.0192845		11.3561	47.229		0.162784	0.0267012	0.239873	0.00247152	0.141512		0.0123439	37.5923			0.000504646	0.100416	3.02092	0.00151396		0.000354318	0.0104372	0.000226283
6.7	Line_2_038	11.3786	47.262	0.0839983	0.0547385	0.0250229	0.233835	0.00384911	0.176519	0	0.0109182	37.8444	0	0.00151105	0.0019323	0.0888625	2.72346	0.00483251	0	0.000581152	0.010123	0	0	0.0724067	0	0.007804	0.0146163		11.3786	47.262	0.0839983	0.0547385	0.0250229	0.233835	0.00384911	0.176519		0.0109182	37.8444		0.00151105	0.0019323	0.0888625	2.72346	0.00483251		0.000581152	0.010123
6.75	Line_2_039	11.758	47.7791	0.0944178	0.0637439	0.0220605	0.156818	0.00352285	0.152834	0	0.00220279	39.0969	0	0.00495381	0.0013238	0.074267	0.705179	0.0031565	0	3.47912e-05	0.0037384	0	0	0.0694494	0	0.00462071	0.00374901		11.758	47.7791	0.0944178	0.0637439	0.0220605	0.156818	0.00352285	0.152834		0.00220279	39.0969		0.00495381	0.0013238	0.074267	0.705179	0.0031565		3.47912e-05	0.0037384
6.8	Line_2_040	11.8748	47.9435	0	0.146602	0.0183885	0.129903	0.0026154	0.124933	0	0	39.3493	0.00367431	5.2153e-05	0.00260229	0.0644571	0.260323	0.00327483	0.000401235	0	0.0013829	0	0	0.0709076	0	3.90853e-05	0.00287667		11.8748	47.9435		0.146602	0.0183885	0.129903	0.0026154	0.124933			39.3493	0.00367431	5.2153e-05	0.00260229	0.0644571	0.260323	0.00327483	0.000401235		0.0013829
6.85	Line_2_041	11.9093	47.9772	0	0.143547	0.0231354	0.105422	0.00216846	0.117854	0	0	39.4695	0	0	8.25032e-05	0.0660467	0.1063	0.00409924	0	0.000120489	0.00103715	0	0	0.070888	0	0.000624579	0.00265538		11.9093	47.9772		0.143547	0.0231354	0.105422	0.00216846	0.117854			39.4695			8.25032e-05	0.0660467	0.1063	0.00409924		0.000120489	0.00103715
6.9	Line_2_042	11.8813	47.962	0.0320306	0.152303	0.0298057	0.111129	0.00255668	0.151493	0	0	39.3603	0	0.00736074	0	0.0659626	0.156303	0.00284433	0	0.0011468	0.00199906	0.000106058	0	0.0736021	0	0.00609129	0.00172072		11.8813	47.962	0.0320306	0.152303	0.0298057	0.111129	0.00255668	0.151493			39.3603		0.00736074		0.0659626	0.156303	0.00284433		0.0011468	0.00199906	0.000106058
6.95	Line_2_043	11.8645	47.9376	0	0.0730625	0.0191924	0.121021	0.00216542	0.166397	0	0	39.4349	0	0	5.74228e-05	0.0635327	0.227	0.00143745	0	0.000412998	0.00142769	0.000266709	0	0.0738975	0	0.011035	0.00205563		11.8645	47.9376		0.0730625	0.0191924	0.121021	0.00216542	0.166397			39.4349			5.74228e-05	0.0635327	0.227	0.00143745		0.000412998	0.00142769	0.000266709
7	Line_2_044	11.8996	47.9663	0	0.130668	0.026777	0.118482	0.000705354	0.116988	0	0	39.4582	0	0.000107475	0.00167259	0.061988	0.136221	0.000764294	0	0.000136505	0.00118902	0.00127474	0	0.0713918	0	0.00531038	0.00224629		11.8996	47.9663		0.130668	0.026777	0.118482	0.000705354	0.116988			39.4582		0.000107475	0.00167259	0.061988	0.136221	0.000764294		0.000136505	0.00118902	0.00127474
7.05	Line_2_045	11.8929	47.9309	0	0.112534	0.0214038	0.0878859	0.00160902	0.112043	0	0	39.4662	0	0.000940582	9.76656e-05	0.0658931	0.219487	0.00138814	0.000365575	0.000326159	0.00200267	0.00138279	0	0.0706281	0	0.00931463	0.0026832		11.8929	47.9309		0.112534	0.0214038	0.0878859	0.00160902	0.112043			39.4662		0.000940582	9.76656e-05	0.0658931	0.219487	0.00138814	0.000365575	0.000326159	0.00200267	0.00138279
7.1	Line_2_046	11.8716	47.8817	0	0.121479	0.0249323	0.081073	0.00138711	0.0892562	0	0	39.3795	0	0	0	0.0713828	0.391889	0.00100814	0	0.000230578	0.00258126	0.00129038	0	0.0722978	0	0.00351354	0.00484374		11.8716	47.8817		0.121479	0.0249323	0.081073	0.00138711	0.0892562			39.3795				0.0713828	0.391889	0.00100814		0.000230578	0.00258126	0.00129038
7.15	Line_2_047	11.7635	47.763	0	0.0714367	0.0275949	0.141486	0.00112133	0.118338	0	0	39.1006	0.0214989	0	0	0.0818693	0.813635	0.00801788	0	0.00210763	0.00391427	0.00111884	0	0.0736435	0	0	0.00718074		11.7635	47.763		0.0714367	0.0275949	0.141486	0.00112133	0.118338			39.1006	0.0214989			0.0818693	0.813635	0.00801788		0.00210763	0.00391427	0.00111884
7.2	Line_2_048	11.6232	47.6183	0	0.0778649	0.0288404	0.169668	0.000905269	0.191354	0	0	38.6205	0.0372022	0	0	0.116686	1.39976	0.0159763	0	0.00243236	0.00661048	0.000507866	0	0.076409	0	0	0.0138147		11.6232	47.6183		0.0778649	0.0288404	0.169668	0.000905269	0.191354			38.6205	0.0372022			0.116686	1.39976	0.0159763		0.00243236	0.00661048	0.000507866
7.25	Line_2_049	11.6197	47.6293	0	0.166251	0.0285433	0.183691	0.00125526	0.191088	0	0	38.4658	0.0367331	0.00660066	0	0.23434	1.34295	0.00525037	0	0.00225967	0.00613474	4.10871e-05	0	0.0708254	0	0	0.0092757		11.6197	47.6293		0.166251	0.0285433	0.183691	0.00125526	0.191088			38.4658	0.0367331	0.00660066		0.23434	1.34295	0.00525037		0.00225967	0.00613474	4.10871e-05
7.3	Line_2_050	11.6627	47.6559	0	0.126126	0.0264565	0.148915	0.00175976	0.172615	0	0	38.6759	0	0.000316302	0.00135852	0.13497	1.28684	0.0127203	0	0.000348666	0.00450379	0.00100206	0	0.0700359	0	0.00516937	0.0123243		11.6627	47.6559		0.126126	0.0264565	0.148915	0.00175976	0.172615			38.6759		0.000316302	0.00135852	0.13497	1.28684	0.0127203		0.000348666	0.00450379	0.00100206
7.35	Line_2_051	11.81	47.8116	0	0.115381	0.0197638	0.139254	0.00154514	0.0930392	0	0	39.1831	0	0.00489196	0.00168944	0.0645407	0.645518	0.0156385	0	0.00102097	0.00307652	0.000900761	0	0.0743715	0	0.00285473	0.0117695		11.81	47.8116		0.115381	0.0197638	0.139254	0.00154514	0.0930392			39.1831		0.00489196	0.00168944	0.0645407	0.645518	0.0156385		0.00102097	0.00307652	0.000900761
7.4	Line_2_052	11.9385	47.9044	0	0.0687942	0.0214775	0.0875858	0.000179486	0	0	0	39.687	0.0152786	0	0.00308872	0.0545502	0.111607	0.0165089	0	0.000523337	0.00197222	0.00148946	0	0.0780723	0	0	0.00895716		11.9385	47.9044		0.0687942	0.0214775	0.0875858	0.000179486				39.687	0.0152786		0.00308872	0.0545502	0.111607	0.0165089		0.000523337	0.00197222	0.00148946
7.45	Line_2_053	11.9279	47.9726	0	0.139043	0.0304011	0.101026	0.00103971	0.0774408	0	0	39.5348	0.0349954	0	0.00146738	0.0508271	0.0160636	0.0217428	0	0.000646674	0.00212206	0.000527829	0	0.0803434	0	0	0.00695491		11.9279	47.9726		0.139043	0.0304011	0.101026	0.00103971	0.0774408			39.5348	0.0349954		0.00146738	0.0508271	0.0160636	0.0217428		0.000646674	0.00212206	0.000527829
7.5	Line_2_054	11.8782	48.0323	0	0.171435	0.0269475	0.123709	0.00171664	0.234069	0	0	39.3153	0.041304	0	0.0013477	0.0509887	0.00542134	0.0199448	0	0.000528867	0.00249076	0.00111969	0	0.080624	0	0.00651622	0.00608418		11.8782	48.0323		0.171435	0.0269475	0.123709	0.00171664	0.234069			39.3153	0.041304		0.0013477	0.0509887	0.00542134	0.0199448		0.000528867	0.00249076	0.00111969
7.55	Line_2_055	11.885	47.9574	0.0570754	0.0531745	0.0314316	0.134485	0.00263125	0.149716	0	0	39.5332	0.016702	0.00266427	0.00213872	0.0542131	0.00800022	0.00968743	0.000382741	0	0.00372621	0.0014855	0	0.0805142	0	0.0107585	0.00554083		11.885	47.9574	0.0570754	0.0531745	0.0314316	0.134485	0.00263125	0.149716			39.5332	0.016702	0.00266427	0.00213872	0.0542131	0.00800022	0.00968743	0.000382741		0.00372621	0.0014855
7.6	Line_2_056	11.9256	47.9871	0	0.110069	0.024124	0.100055	0.00209428	0.114707	0	0	39.5752	0	0.00357874	0.000628481	0.0483152	0.0082577	0.00273789	0.000226616	0	0.00302572	0.00164748	0	0.0798628	0	0.0117142	0.0010549		11.9256	47.9871		0.110069	0.024124	0.100055	0.00209428	0.114707			39.5752		0.00357874	0.000628481	0.0483152	0.0082577	0.00273789	0.000226616		0.00302572	0.00164748
7.65	Line_2_057	11.9006	47.9715	0	0.0862057	0.0233051	0.129371	0.00522954	0.1449	0.0572993	0.000329091	39.5323	0.00118513	0.00029234	0.00218315	0.0482168	0.012472	0	0.00352774	0	0.00105699	0.00200724	0	0.0771361	0	0.000845836	6.22259e-05		11.9006	47.9715		0.0862057	0.0233051	0.129371	0.00522954	0.1449	0.0572993	0.000329091	39.5323	0.00118513	0.00029234	0.00218315	0.0482168	0.012472		0.00352774		0.00105699	0.00200724
7.7	Line_2_058	11.9166	47.9948	0.0180706	0.143183	0.028658	0.154406	0.00273177	0.0857896	0	0	39.492	0.0220865	0	0	0.0514018	0.00832986	0	0.000760419	0.000296515	0.00166813	0.00153097	0	0.0764049	0	0	0.00125747		11.9166	47.9948	0.0180706	0.143183	0.028658	0.154406	0.00273177	0.0857896			39.492	0.0220865			0.0514018	0.00832986		0.000760419	0.000296515	0.00166813	0.00153097
7.75	Line_2_059	11.9279	47.9957	0	0.152905	0.0289575	0.0943722	0.00142895	0.108721	0	0	39.5127	0.0073542	0	0.000209353	0.0631035	0.015248	0	0.000558464	0.000452504	0.00272005	0.00125019	0	0.0784215	0	0.00793055	0.000113785		11.9279	47.9957		0.152905	0.0289575	0.0943722	0.00142895	0.108721			39.5127	0.0073542		0.000209353	0.0631035	0.015248		0.000558464	0.000452504	0.00272005	0.00125019
7.8	Line_2_060	11.9236	47.9845	0	0.113138	0.0240993	0.0911566	0.00221726	0.117841	0	0	39.5661	0	0	0.00145345	0.065432	0.0213003	0	0.0030564	0.000673369	0.00181792	0.00141753	0	0.0732424	0	0.00676893	0.00219545		11.9236	47.9845		0.113138	0.0240993	0.0911566	0.00221726	0.117841			39.5661			0.00145345	0.065432	0.0213003		0.0030564	0.000673369	0.00181792	0.00141753
7.85	Line_2_061	11.9328	47.9962	0	0.15992	0.0281925	0.0877422	0.00205092	0.102624	0	0	39.5215	0	0	0.000358538	0.0607842	0.0213313	6.64422e-05	0.00233652	0.00106301	0.00238583	0.0021314	0	0.0694118	0	0.00811156	0.00105117		11.9328	47.9962		0.15992	0.0281925	0.0877422	0.00205092	0.102624			39.5215			0.000358538	0.0607842	0.0213313	6.64422e-05	0.00233652	0.00106301	0.00238583	0.0021314
7.9	Line_2_062	11.9267	47.991	0.0188881	0.167425	0.0221742	0.0973734	0.00150402	0.106907	0	0	39.4894	0	0	0	0.0531059	0.0273478	0.00119344	7.47694e-05	0.00193043	0.00465197	0.00420162	0	0.0681282	0	0.0143625	0.00362708		11.9267	47.991	0.0188881	0.167425	0.0221742	0.0973734	0.00150402	0.106907			39.4894				0.0531059	0.0273478	0.00119344	7.47694e-05	0.00193043	0.00465197	0.00420162
7.95	Line_2_063	11.9058	47.9885	0	0.199132	0.0267636	0.111724	0.00217399	0.125189	0	0	39.3669	0	0.00191327	0	0.0518025	0.118128	0.000261972	0	0.00181072	0.00517517	0.0047186	0	0.069181	0	0.0119067	0.00895563		11.9058	47.9885		0.199132	0.0267636	0.111724	0.00217399	0.125189			39.3669		0.00191327		0.0518025	0.118128	0.000261972		0.00181072	0.00517517	0.0047186
8	Line_2_064	11.7765	47.8217	0.0168489	0.207026	0.023454	0.118497	0.00121453	0.16796	0	0	38.9222	0	0	0	0.126206	0.707859	0	0.00348968	0.000608406	0.00490875	0.00521557	0	0.0698819	0	0.0163966	0.0100954		11.7765	47.8217	0.0168489	0.207026	0.023454	0.118497	0.00121453	0.16796			38.9222				0.126206	0.707859		0.00348968	0.000608406	0.00490875	0.00521557
8.05	Line_2_065	11.8087	47.8349	0	0.196887	0.0186339	0.120158	0.000266191	0.116881	0	0	39.0466	0	0	0	0.0704386	0.67153	0.000829396	0.0131349	2.80734e-05	0.00582187	0.00478859	0	0.0692475	0	0.0170992	0.00416858		11.8087	47.8349		0.196887	0.0186339	0.120158	0.000266191	0.116881			39.0466				0.0704386	0.67153	0.000829396	0.0131349	2.80734e-05	0.00582187	0.00478859
8.1	Line_2_066	11.9445	47.9905	0	0.180002	0.0254493	0.0694258	0.0015252	0.0808704	0	0	39.5259	0	0	0.000678796	0.0245231	0.050425	0.00232124	0.00692169	0.000354124	0.00183552	0.00441425	0	0.0728096	0	0.0142119	0.00339744		11.9445	47.9905		0.180002	0.0254493	0.0694258	0.0015252	0.0808704			39.5259			0.000678796	0.0245231	0.050425	0.00232124	0.00692169	0.000354124	0.00183552	0.00441425
8.15	Line_2_067	11.9621	47.9624	0	0.0908171	0.0225846	0.0609584	0.00200881	0.0353945	0	0	39.7306	0	0	0.00130988	0.0244027	0.0129333	0.00749182	0.000646659	0.000685378	0.000838415	0.00136658	0	0.0753907	0	0.00408837	0.00398046		11.9621	47.9624		0.0908171	0.0225846	0.0609584	0.00200881	0.0353945			39.7306			0.00130988	0.0244027	0.0129333	0.00749182	0.000646659	0.000685378	0.000838415	0.00136658
8.2	Line_2_068	11.9651	47.9562	0.00150259	0.160083	0.0124176	0.0607224	0.0020184	0	0	0	39.6263	0.0655391	0	0.000545602	0.0365135	0.0060195	0.0226755	0	0.00184922	0.00105939	0.000184238	0	0.0754752	0	0	0.00580521		11.9651	47.9562	0.00150259	0.160083	0.0124176	0.0607224	0.0020184				39.6263	0.0655391		0.000545602	0.0365135	0.0060195	0.0226755		0.00184922	0.00105939	0.000184238
8.25	Line_2_069	11.7939	48.0884	0	0.164584	0.0227851	0.0779692	0.0018866	0.484017	0	0	39.0471	0.160656	0	0.00169543	0.0370906	0.00495361	0.0305419	0	0.00245561	0	9.16906e-05	0	0.0764219	0	0	0.00547647		11.7939	48.0884		0.164584	0.0227851	0.0779692	0.0018866	0.484017			39.0471	0.160656		0.00169543	0.0370906	0.00495361	0.0305419		0.00245561		9.16906e-05
8.3	Line_2_070	11.8536	48.0334	0	0.120165	0.0293214	0.0965984	0.00200864	0.303511	0	0	39.319	0.0815027	0	0.000726765	0.0359092	0.00933819	0.0169966	0	0.00351768	0.000977542	0.000982369	0	0.077519	0	0.00578067	0.00918249		11.8536	48.0334		0.120165	0.0293214	0.0965984	0.00200864	0.303511			39.319	0.0815027		0.000726765	0.0359092	0.00933819	0.0169966		0.00351768	0.000977542	0.000982369
8.35	Line_2_071	11.8997	47.9343	0.0604603	0.0177309	0.0313784	0.106569	0.00270264	0.112939	0.0109679	0	39.641	0.03233	0	0.00267427	0.0316297	0.00731802	0.00703966	0	0.00288799	0.00466763	0.000357626	0	0.079595	0	0.00335373	0.0103287		11.8997	47.9343	0.0604603	0.0177309	0.0313784	0.106569	0.00270264	0.112939	0.0109679		39.641	0.03233		0.00267427	0.0316297	0.00731802	0.00703966		0.00288799	0.00466763	0.000357626
8.4	Line_2_072	11.9313	47.9478	0	0.0581472	0.0221432	0.094718	0.00221976	0.063715	0.0140758	0	39.6787	0.0407471	0	0.00511185	0.0322377	0.00238757	0.00814661	0	0.004194	0.00424691	0	0	0.0820579	0	0	0.00801177		11.9313	47.9478		0.0581472	0.0221432	0.094718	0.00221976	0.063715	0.0140758		39.6787	0.0407471		0.00511185	0.0322377	0.00238757	0.00814661		0.004194	0.00424691
8.45	Line_2_073	11.9466	47.9767	0	0.146053	0.027292	0.0857142	0.00224063	0.0580065	0.00397641	0	39.5842	0.0151165	0.00734157	0	0.037887	0.00220772	0.00564762	0	0.00128979	0.00248594	0.00117509	0	0.0834352	0	0.00659373	0.0059756		11.9466	47.9767		0.146053	0.027292	0.0857142	0.00224063	0.0580065	0.00397641		39.5842	0.0151165	0.00734157		0.037887	0.00220772	0.00564762		0.00128979	0.00248594	0.00117509
8.5	Line_2_074	11.9417	47.9589	0	0.0777234	0.0240513	0.0830261	0.00092644	0.0700107	0	0	39.6801	0	0.00685535	0	0.0396277	0.00304179	0.00812695	0	0.00273021	0.00394528	0.00243903	0	0.0843864	0	0.00956857	0.00284173		11.9417	47.9589		0.0777234	0.0240513	0.0830261	0.00092644	0.0700107			39.6801		0.00685535		0.0396277	0.00304179	0.00812695		0.00273021	0.00394528	0.00243903
8.55	Line_2_075	11.9373	47.9979	0	0.144682	0.0283064	0.0733148	0.00171093	0.108671	0	0	39.5572	0.00426099	0.000822344	0	0.0463219	0.0056766	0.00231125	0.000344198	0.00185714	0.00404789	0.00123386	0	0.0796982	0	0.0021491	0.00217548		11.9373	47.9979		0.144682	0.0283064	0.0733148	0.00171093	0.108671			39.5572	0.00426099	0.000822344		0.0463219	0.0056766	0.00231125	0.000344198	0.00185714	0.00404789	0.00123386
8.6	Line_2_076	11.9179	47.9554	0.131714	0.190379	0.0234512	0.0783282	0.000974128	0.100849	0	0	39.4164	0	0.00844163	0	0.0460219	0.0100995	0.0110412	0	0.00200932	0.00124756	0.000755298	0	0.0811196	0	0.0230893	0.000751654		11.9179	47.9554	0.131714	0.190379	0.0234512	0.0783282	0.000974128	0.100849			39.4164		0.00844163		0.0460219	0.0100995	0.0110412		0.00200932	0.00124756	0.000755298
8.65	Line_2_077	11.9203	47.9928	0	0.109443	0.0213083	0.0860322	0.00139802	0.143812	0.00329838	0	39.5558	0.0134393	0.00474907	0	0.0375548	0.00499501	0.0101804	0	0.00144314	0.000707081	0.000436163	0	0.0852322	0	0.00601837	0.0010718		11.9203	47.9928		0.109443	0.0213083	0.0860322	0.00139802	0.143812	0.00329838		39.5558	0.0134393	0.00474907		0.0375548	0.00499501	0.0101804		0.00144314	0.000707081	0.000436163
8.7	Line_2_078	11.9071	47.9783	0	0.0782158	0.0301163	0.0856074	0.00226317	0.14302	0.00753337	0	39.5635	0.05946	0	7.53487e-05	0.0401362	0.00279692	0.00664194	0.000679114	0.00547205	0	0.000604712	0	0.085152	0	0	0.0033329		11.9071	47.9783		0.0782158	0.0301163	0.0856074	0.00226317	0.14302	0.00753337		39.5635	0.05946		7.53487e-05	0.0401362	0.00279692	0.00664194	0.000679114	0.00547205		0.000604712
8.75	Line_2_079	11.9296	47.9412	0	0	0.0195231	0.0942629	0.0015483	0.0842935	0.00686593	0	39.7665	0	0.00654825	0	0.0369842	0.00568344	0.00231873	0	0.0051066	0.00245646	0.000744951	0	0.0868844	0	0.00938049	8.5094e-05		11.9296	47.9412			0.0195231	0.0942629	0.0015483	0.0842935	0.00686593		39.7665		0.00654825		0.0369842	0.00568344	0.00231873		0.0051066	0.00245646	0.000744951
8.8	Line_2_080	11.9174	47.9673	0	0.0580831	0.0269739	0.162012	0.00146611	0.078003	0.000806219	0	39.6298	0	0.00992715	0	0.0403604	0.00589368	0.0013633	0	0.00101707	0.00126934	0.00110261	0	0.087879	0	0.00934672	7.58418e-06		11.9174	47.9673		0.0580831	0.0269739	0.162012	0.00146611	0.078003	0.000806219		39.6298		0.00992715		0.0403604	0.00589368	0.0013633		0.00101707	0.00126934	0.00110261
8.85	Line_2_081	11.9236	47.9851	0	0.0893255	0.018443	0.136271	0.00149434	0.0931762	0	0	39.5993	0.0123518	0	0	0.0394318	0.00591677	0.00364181	0	0.00160633	0.00112773	0.000362395	0	0.0871658	0	0	0.00164812		11.9236	47.9851		0.0893255	0.018443	0.136271	0.00149434	0.0931762			39.5993	0.0123518			0.0394318	0.00591677	0.00364181		0.00160633	0.00112773	0.000362395
8.9	Line_2_082	11.9268	47.9777	0	0.0912939	0.0217706	0.0905319	0.00129075	0.100739	0	0	39.6064	0.0380073	0	0.00019126	0.0417548	0.00622679	0.00212272	0	0.00150511	0.00131235	0.00109307	0	0.0874979	0	0	0.003714		11.9268	47.9777		0.0912939	0.0217706	0.0905319	0.00129075	0.100739			39.6064	0.0380073		0.00019126	0.0417548	0.00622679	0.00212272		0.00150511	0.00131235	0.00109307
8.95	Line_2_083	11.9277	47.967	0	0.0824843	0.0258892	0.0916035	0.00242586	0.0815731	0	0	39.6228	0.0507631	0	0	0.0413105	0.00519864	0.0040132	0	0.00129904	0.00245516	0.000814985	0	0.0898071	0	0	0.0029502		11.9277	47.967		0.0824843	0.0258892	0.0916035	0.00242586	0.0815731			39.6228	0.0507631			0.0413105	0.00519864	0.0040132		0.00129904	0.00245516	0.000814985
9	Line_2_084	11.9296	47.9536	0	0.0539894	0.0299683	0.0727652	0.00212254	0.0766462	0	0	39.6752	0.0571631	0	0	0.0412126	0.00641211	0.00347481	0	0.00166946	0.00147955	8.62261e-05	0	0.0918576	0	0	0.00280471		11.9296	47.9536		0.0539894	0.0299683	0.0727652	0.00212254	0.0766462			39.6752	0.0571631			0.0412126	0.00641211	0.00347481		0.00166946	0.00147955	8.62261e-05
9.05	Line_2_085	11.9305	47.9465	0.0319148	0.063794	0.0303557	0.0889427	0.00263563	0.0573724	0	0	39.6636	0.0392328	0	0	0.0416476	0.00547461	0.00508978	0	0.00175076	0.000792549	0.00123076	0	0.0889344	0	0	0.000238073		11.9305	47.9465	0.0319148	0.063794	0.0303557	0.0889427	0.00263563	0.0573724			39.6636	0.0392328			0.0416476	0.00547461	0.00508978		0.00175076	0.000792549	0.00123076
9.1	Line_2_086	11.9154	47.9723	0.0225728	0.0831434	0.0272285	0.0815821	0.00194705	0.118519	0	0	39.5818	0.0571051	0	0	0.0377712	0.00375857	0.00488212	0	0.00129598	0.00055422	0.000730499	0	0.087608	0	0	0.00184966		11.9154	47.9723	0.0225728	0.0831434	0.0272285	0.0815821	0.00194705	0.118519			39.5818	0.0571051			0.0377712	0.00375857	0.00488212		0.00129598	0.00055422	0.000730499
9.15	Line_2_087	11.9367	47.9563	0	0.0303694	0.0204046	0.0802127	0.00166961	0.0788067	0	0	39.7396	0.0183506	0	0.000343801	0.0351802	0.0048145	0.00417288	0	0.00193534	0.00108827	0.000715762	0	0.0884198	0	0	0.000844104		11.9367	47.9563		0.0303694	0.0204046	0.0802127	0.00166961	0.0788067			39.7396	0.0183506		0.000343801	0.0351802	0.0048145	0.00417288		0.00193534	0.00108827	0.000715762
9.2	Line_2_088	11.9426	47.9824	0	0.11381	0.022194	0.101417	0.00201235	0.0712008	0	0	39.6213	0	0	3.62342e-05	0.0351493	0.00285559	0.00428174	0	0.000604584	0.00272692	0.000746412	0	0.0893666	0	0.0054327	0.00178205		11.9426	47.9824		0.11381	0.022194	0.101417	0.00201235	0.0712008			39.6213			3.62342e-05	0.0351493	0.00285559	0.00428174		0.000604584	0.00272692	0.000746412
9.25	Line_2_089	11.946	47.9583	0	0.0604628	0.0256006	0.0838345	0.00164412	0.0575097	0	0	39.7208	0	0	0	0.0383663	0.00171688	0.00612483	0	0.000723018	0.00415514	0.000981422	0	0.0885375	0	0.00429233	0.000995467		11.946	47.9583		0.0604628	0.0256006	0.0838345	0.00164412	0.0575097			39.7208				0.0383663	0.00171688	0.00612483		0.000723018	0.00415514	0.000981422
9.3	Line_2_090	11.9486	47.9465	0	0.0315677	0.0215746	0.0929645	0.00202348	0.0377482	0	0	39.7776	0	0.000368559	0	0.0400351	0.00149207	0.00210689	0	0.000274808	0.00297697	0.00181133	0	0.0876388	0	0.00215999	0.00253177		11.9486	47.9465		0.0315677	0.0215746	0.0929645	0.00202348	0.0377482			39.7776		0.000368559		0.0400351	0.00149207	0.00210689		0.000274808	0.00297697	0.00181133
9.35	Line_2_091	11.9351	47.9415	0.0302155	0.0536709	0.029121	0.0966852	0.0017318	0.053883	0	0	39.6957	0	0.000659888	0	0.0437322	0.00333838	0.00111771	0.000169747	0.000633445	0.00172625	0.00183604	0	0.0886801	0	0.0183732	0.00212191		11.9351	47.9415	0.0302155	0.0536709	0.029121	0.0966852	0.0017318	0.053883			39.6957		0.000659888		0.0437322	0.00333838	0.00111771	0.000169747	0.000633445	0.00172625	0.00183604
9.4	Line_2_092	11.9513	47.9634	0	0.0896539	0.0258365	0.0754945	0.00239996	0.0503123	0	0	39.6903	0	0	0	0.0400699	0.0066005	0.0015966	0	0.000545994	0.00312909	0.00204732	0	0.0891103	0	0.00706416	0.00110342		11.9513	47.9634		0.0896539	0.0258365	0.0754945	0.00239996	0.0503123			39.6903				0.0400699	0.0066005	0.0015966		0.000545994	0.00312909	0.00204732
9.45	Line_2_093	11.9417	47.963	0	0.0628424	0.0231688	0.0848151	0.00154087	0.0721672	0	0	39.7023	0	0.000478138	0.000271809	0.0382726	0.00252627	0.00140209	0.0010844	0.000284188	0.00326114	0.00253387	0	0.089084	0	0.00832479	0.000977557		11.9417	47.963		0.0628424	0.0231688	0.0848151	0.00154087	0.0721672			39.7023		0.000478138	0.000271809	0.0382726	0.00252627	0.00140209	0.0010844	0.000284188	0.00326114	0.00253387
9.5	Line_2_094	11.9412	47.9618	0	0.0742047	0.022601	0.105767	0.00129093	0.0582033	0	0	39.6817	0	0	0	0.0346935	0	0.00187005	0	7.66243e-05	0.00246987	0.00241275	0	0.0894237	0	0.0196031	0.00270533		11.9412	47.9618		0.0742047	0.022601	0.105767	0.00129093	0.0582033			39.6817				0.0346935		0.00187005		7.66243e-05	0.00246987	0.00241275
9.55	Line_2_095	11.9447	47.9336	0	0.0310544	0.0214264	0.0969424	0.00174644	0.0356717	0	0	39.7636	0	0.00370058	0	0.0363095	0	0.00152269	0.00170626	0.000798459	0.00272828	0.00242392	0	0.0914079	0	0.0288455	0.00188665		11.9447	47.9336		0.0310544	0.0214264	0.0969424	0.00174644	0.0356717			39.7636		0.00370058		0.0363095		0.00152269	0.00170626	0.000798459	0.00272828	0.00242392
9.6	Line_2_096	11.9176	47.9233	0.00430866	0	0.0234106	0.166896	0.00222579	0.0430911	0.00925137	0	39.725	0	0.00265318	0	0.037543	0.00385633	0.0039041	0.000241763	0.000104278	0.00522567	0.00138475	0	0.0904283	0	0.0373313	0.00216326		11.9176	47.9233	0.00430866		0.0234106	0.166896	0.00222579	0.0430911	0.00925137		39.725		0.00265318		0.037543	0.00385633	0.0039041	0.000241763	0.000104278	0.00522567	0.00138475
9.65	Line_2_097	11.8934	47.8865	0.178974	0.0504835	0.0240076	0.211767	0.00261201	0.00699886	0.00100195	0	39.5629	0	0	0	0.0337886	0.0083198	0.00517451	0.00158981	0.000520978	0.00381323	0.00233214	0	0.0865705	0	0.035675	0.00355939		11.8934	47.8865	0.178974	0.0504835	0.0240076	0.211767	0.00261201	0.00699886	0.00100195		39.5629				0.0337886	0.0083198	0.00517451	0.00158981	0.000520978	0.00381323	0.00233214
9.7	Line_2_098	11.9336	47.9579	0	0.104701	0.0272424	0.130173	0.0015181	0.0400398	0	0	39.6063	0	5.7841e-06	0	0.0386824	0.0476093	0.00126455	0.000537487	0.000751443	0.00325737	0.00186577	0	0.0893292	0	0.013639	0.00147726		11.9336	47.9579		0.104701	0.0272424	0.130173	0.0015181	0.0400398			39.6063		5.7841e-06		0.0386824	0.0476093	0.00126455	0.000537487	0.000751443	0.00325737	0.00186577
9.75	Line_2_099	11.932	47.949	0	0.103537	0.0250343	0.0974838	0.0018107	0.0537262	0	0	39.6017	0	0.00118798	0	0.0482412	0.0808238	0.00149398	0	0.000151332	0.00374184	0.00208851	0	0.091612	0	0.00539464	0.00098028		11.932	47.949		0.103537	0.0250343	0.0974838	0.0018107	0.0537262			39.6017		0.00118798		0.0482412	0.0808238	0.00149398		0.000151332	0.00374184	0.00208851
9.8	Line_2_100	11.9229	47.9449	0	0.100268	0.0316864	0.0909449	0.00165279	0.0722418	0	0	39.5762	0	0.000281584	0	0.0575013	0.0879318	0.00302765	2.22546e-05	0.000226816	0.00485695	0.00200533	0	0.0925841	0	0.00761627	0.00317828		11.9229	47.9449		0.100268	0.0316864	0.0909449	0.00165279	0.0722418			39.5762		0.000281584		0.0575013	0.0879318	0.00302765	2.22546e-05	0.000226816	0.00485695	0.00200533
9.85	Line_2_101	11.9006	47.9416	0	0.0837334	0.0268028	0.0939938	0.00107392	0.118451	0	0	39.5301	0	0	0	0.0743307	0.119453	0.00499066	0	0.000367802	0.0039733	0.00169623	0	0.0909607	0	0.00519518	0.00262376		11.9006	47.9416		0.0837334	0.0268028	0.0939938	0.00107392	0.118451			39.5301				0.0743307	0.119453	0.00499066		0.000367802	0.0039733	0.00169623
9.9	Line_2_102	11.892	47.9661	0	0.13281	0.0227725	0.165621	0.00167188	0.0994662	0	0	39.4216	0.0296056	0	0.000335332	0.068949	0.099076	0.00567507	0	0.000141547	0.00224864	0.000955573	0	0.0882713	0	0	0.00273921		11.892	47.9661		0.13281	0.0227725	0.165621	0.00167188	0.0994662			39.4216	0.0296056		0.000335332	0.068949	0.099076	0.00567507		0.000141547	0.00224864	0.000955573
9.95	Line_2_103	11.9084	47.9604	0	0.0789876	0.0225717	0.160284	0.0023456	0.0728151	0	0	39.5671	0.0370296	0.000529436	0.000301645	0.0434394	0.0438377	0.00922345	0	0.000837196	0.0031827	0.000861996	0	0.083452	0	0.00166754	0.00272011		11.9084	47.9604		0.0789876	0.0225717	0.160284	0.0023456	0.0728151			39.5671	0.0370296	0.000529436	0.000301645	0.0434394	0.0438377	0.00922345		0.000837196	0.0031827	0.000861996
10	Line_2_104	11.9072	47.9832	0	0.0717385	0.0292851	0.0815152	0.00180883	0.147174	0	0	39.5764	0.0669707	0	0.000367494	0.0275813	0.00996211	0.00716418	0	0.00143039	0.00328431	0.00148469	0	0.0804396	0	0	0.00304084		11.9072	47.9832		0.0717385	0.0292851	0.0815152	0.00180883	0.147174			39.5764	0.0669707		0.000367494	0.0275813	0.00996211	0.00716418		0.00143039	0.00328431	0.00148469
10.05	Line_2_105	11.9409	47.9632	0	0.0705347	0.0271249	0.0868134	0.00170539	0.0629702	0	0	39.6919	0.019076	0.00082538	0.00178164	0.0255359	0.00573501	0.00672311	0	0.00163697	0.00284869	0.00123299	0	0.0785295	0	0.00746635	0.0034499		11.9409	47.9632		0.0705347	0.0271249	0.0868134	0.00170539	0.0629702			39.6919	0.019076	0.00082538	0.00178164	0.0255359	0.00573501	0.00672311		0.00163697	0.00284869	0.00123299
10.1	Line_2_106	11.9357	47.9584	0	0.0424123	0.0262969	0.087922	0.00259033	0.0671704	0	0	39.721	0.0325781	0	0.00025601	0.0249727	0.00748088	0.00553798	0	0.00125174	0.00321611	0.00109161	0	0.0783517	0	0	0.00382711		11.9357	47.9584		0.0424123	0.0262969	0.087922	0.00259033	0.0671704			39.721	0.0325781		0.00025601	0.0249727	0.00748088	0.00553798		0.00125174	0.00321611	0.00109161
10.15	Line_2_107	11.9388	47.9345	0.0444175	0.0327693	0.0215473	0.0839984	0.0020112	0.0434794	0	0	39.7473	0.0242483	0.00039695	0.00278725	0.0232332	0.00281432	0.00630986	0	0.00148917	0.00308851	0.00223983	0	0.0779744	0	0	0.00670159		11.9388	47.9345	0.0444175	0.0327693	0.0215473	0.0839984	0.0020112	0.0434794			39.7473	0.0242483	0.00039695	0.00278725	0.0232332	0.00281432	0.00630986		0.00148917	0.00308851	0.00223983
10.2	Line_2_108	11.9077	47.949	0.092595	0.0754247	0.0295874	0.0799861	0.00280334	0.110022	0	0	39.5736	0.0488718	0	0.00298125	0.0296662	0.00446677	0.00701016	0	0.0015301	0.00269368	0.00202098	0	0.0770556	0	0	0.00304851		11.9077	47.949	0.092595	0.0754247	0.0295874	0.0799861	0.00280334	0.110022			39.5736	0.0488718		0.00298125	0.0296662	0.00446677	0.00701016		0.0015301	0.00269368	0.00202098
10.25	Line_2_109	11.9059	47.9815	0	0.0692629	0.0258764	0.0756133	0.00194575	0.149698	0	0	39.5786	0.0831442	0	0	0.0258838	0.00589133	0.00820301	0	0.00190286	0.00527829	0.00165286	0	0.0752501	0	0.00211319	0.00223059		11.9059	47.9815		0.0692629	0.0258764	0.0756133	0.00194575	0.149698			39.5786	0.0831442			0.0258838	0.00589133	0.00820301		0.00190286	0.00527829	0.00165286
10.3	Line_2_110	11.9404	47.9303	0	0.0410233	0.0316287	0.0644088	0.00229548	0.0216332	0	0	39.7405	0.102687	0.00137885	0	0.0202963	0.00162096	0.00926712	0	0.000299887	0.00303799	0.00151306	0	0.0750091	0	0.00860733	0.00405932		11.9404	47.9303		0.0410233	0.0316287	0.0644088	0.00229548	0.0216332			39.7405	0.102687	0.00137885		0.0202963	0.00162096	0.00926712		0.000299887	0.00303799	0.00151306
10.35	Line_3_01	11.9401	47.961	0	0.0722423	0.0223458	0.084647	0.00288162	0.059235	0.00439027	0	39.6873	0.0409476	0.000809007	0.000599504	0.0213351	0.00595541	0.0110481	0	0.000580521	0.00208718	0.0013238	0	0.0761803	0	0.00496507	0		11.9401	47.961		0.0722423	0.0223458	0.084647	0.00288162	0.059235	0.00439027		39.6873	0.0409476	0.000809007	0.000599504	0.0213351	0.00595541	0.0110481		0.000580521	0.00208718	0.0013238
10.4	Line_3_02	11.9465	47.9952	0	0.146685	0.0299847	0.0848556	0.00281571	0.0732108	0.00543039	0	39.5856	0.0139717	0.00146938	0.000438446	0.0204772	0.00556236	0.00738899	0	0.00096484	0.00155616	0.00107893	0	0.0768078	0	0	0		11.9465	47.9952		0.146685	0.0299847	0.0848556	0.00281571	0.0732108	0.00543039		39.5856	0.0139717	0.00146938	0.000438446	0.0204772	0.00556236	0.00738899		0.00096484	0.00155616	0.00107893
10.45	Line_3_03	11.9603	47.9559	0	0.0640078	0.0198555	0.0505709	0.00194106	0.036627	0.00118503	0	39.7684	0.0292107	0	0.000152204	0.0199823	0.00225944	0.00474986	0	0.00116139	0.00309242	0.000906442	0	0.0764053	0	0	0.00328042		11.9603	47.9559		0.0640078	0.0198555	0.0505709	0.00194106	0.036627	0.00118503		39.7684	0.0292107		0.000152204	0.0199823	0.00225944	0.00474986		0.00116139	0.00309242	0.000906442
10.5	Line_3_04	11.9602	47.9562	0	0.070657	0.022425	0.0615	0.00231058	0.0284542	0.00258912	0	39.7577	0.0259238	0	0.00019021	0.020373	0.00186643	0.00621587	0	0.000483274	0.0040558	0.0015206	0	0.0751048	0	0	0.0021561		11.9602	47.9562		0.070657	0.022425	0.0615	0.00231058	0.0284542	0.00258912		39.7577	0.0259238		0.00019021	0.020373	0.00186643	0.00621587		0.000483274	0.0040558	0.0015206
10.55	Line_3_05	11.9661	47.9673	0	0.0971298	0.0239062	0.0662685	0.00220739	0.0259289	0.000628855	0	39.7333	0	0	0.000275795	0.0235873	0.00379523	0.00422174	0	0.00185846	0.00337262	0.00165371	0	0.0761233	0	0.00235277	0		11.9661	47.9673		0.0971298	0.0239062	0.0662685	0.00220739	0.0259289	0.000628855		39.7333			0.000275795	0.0235873	0.00379523	0.00422174		0.00185846	0.00337262	0.00165371
10.6	Line_3_06	11.9534	47.9622	0	0.0756647	0.0245861	0.0796723	0.00218024	0.0438637	0.00632903	0	39.7262	0	0	0	0.0255195	0.00857158	0.00443483	0	0.00186483	0.00550109	0.000779574	0	0.0762409	0	0.00272141	0.000194794		11.9534	47.9622		0.0756647	0.0245861	0.0796723	0.00218024	0.0438637	0.00632903		39.7262				0.0255195	0.00857158	0.00443483		0.00186483	0.00550109	0.000779574
10.65	Line_3_07	11.9531	47.9713	0.049608	0.169298	0.0320547	0.0767955	0.00259086	0.0304755	0	0	39.5708	0.0109787	0	0.000648314	0.0297153	0.0102106	0.00512651	0	0.000378455	0.00486305	0.00216723	0	0.0760966	0	0	0.0037537		11.9531	47.9713	0.049608	0.169298	0.0320547	0.0767955	0.00259086	0.0304755			39.5708	0.0109787		0.000648314	0.0297153	0.0102106	0.00512651		0.000378455	0.00486305	0.00216723
10.7	Line_3_08	11.9484	47.9658	0	0.0950735	0.0238652	0.104894	0.00268934	0.0293643	0	0	39.6777	0.0253026	0	0.000258122	0.0330618	0.0041076	0.00551711	0	0.00214747	0.00242228	0.00148229	0	0.0760475	0	0	0.00187156		11.9484	47.9658		0.0950735	0.0238652	0.104894	0.00268934	0.0293643			39.6777	0.0253026		0.000258122	0.0330618	0.0041076	0.00551711		0.00214747	0.00242228	0.00148229
10.75	Line_3_09	11.9331	47.9509	0	0.0399634	0.0267603	0.0981837	0.00308475	0.0624661	0.0127977	0	39.716	0.028644	0	0.000555336	0.0260969	0.00595886	0.00805619	0	0.0016248	0.00429832	0.000622358	0	0.078803	0	0	0.00221521		11.9331	47.9509		0.0399634	0.0267603	0.0981837	0.00308475	0.0624661	0.0127977		39.716	0.028644		0.000555336	0.0260969	0.00595886	0.00805619		0.0016248	0.00429832	0.000622358
10.8	Line_3_10	11.951	47.9736	0	0.12101	0.0264271	0.0848963	0.002534	0.0429494	0.00665622	0	39.6418	0.0224831	0	0.000645558	0.0259784	0.00713768	0.00298729	0	0.000976735	0.00422749	0.00143523	0	0.0796007	0	0	0.00373025		11.951	47.9736		0.12101	0.0264271	0.0848963	0.002534	0.0429494	0.00665622		39.6418	0.0224831		0.000645558	0.0259784	0.00713768	0.00298729		0.000976735	0.00422749	0.00143523
10.85	Line_3_11	11.9517	47.9509	0	0.0641878	0.0285352	0.0926026	0.00196563	0.02056	0.0088553	0	39.7374	0.0229837	0	0.000595347	0.0259644	0.00368413	0.00310124	0	0.000441186	0.000978668	0.000544805	0	0.0807368	0	0	0.00415148		11.9517	47.9509		0.0641878	0.0285352	0.0926026	0.00196563	0.02056	0.0088553		39.7374	0.0229837		0.000595347	0.0259644	0.00368413	0.00310124		0.000441186	0.000978668	0.000544805
10.9	Line_3_12	11.9395	47.9285	0.105586	0.0858824	0.0249102	0.0772333	0.00233727	0.0265966	0	0	39.6605	0.0242185	0	0.000541687	0.028289	0.00140953	0.00401505	0	0.000633298	0.00234862	0.00112175	0	0.0814372	0	0.000870653	0.00407568		11.9395	47.9285	0.105586	0.0858824	0.0249102	0.0772333	0.00233727	0.0265966			39.6605	0.0242185		0.000541687	0.028289	0.00140953	0.00401505		0.000633298	0.00234862	0.00112175
10.95	Line_3_13	11.9333	47.9563	0.0376857	0.0943335	0.0273941	0.0757111	0.00212139	0.0662604	0.00395283	0	39.6265	0.0461369	0	0.000533012	0.0324504	0.00314326	0.00551705	7.52865e-05	0.000465107	0.00347774	0.00157705	0	0.0801046	0	0	0.0029238		11.9333	47.9563	0.0376857	0.0943335	0.0273941	0.0757111	0.00212139	0.0662604	0.00395283		39.6265	0.0461369		0.000533012	0.0324504	0.00314326	0.00551705	7.52865e-05	0.000465107	0.00347774	0.00157705
11	Line_3_14	11.9386	47.9443	0	0.016735	0.021595	0.086672	0.00223738	0.0551852	0	0	39.7717	0.0268255	0	0.00159941	0.0294851	0.00632184	0.00573788	0	0.0011042	0.00667	0.00138323	0	0.0811593	0	0	0.00260499		11.9386	47.9443		0.016735	0.021595	0.086672	0.00223738	0.0551852			39.7717	0.0268255		0.00159941	0.0294851	0.00632184	0.00573788		0.0011042	0.00667	0.00138323
11.05	Line_3_15	11.9462	47.9665	0.000708434	0.0882701	0.0260451	0.0918325	0.00196965	0.049167	0	0	39.6781	0.0145421	0	0	0.0337617	0.00471426	0.00483374	0	0.00155164	0.00468676	0.00095511	0	0.0833617	0	0	0.00282969		11.9462	47.9665	0.000708434	0.0882701	0.0260451	0.0918325	0.00196965	0.049167			39.6781	0.0145421			0.0337617	0.00471426	0.00483374		0.00155164	0.00468676	0.00095511
11.1	Line_3_16	11.9309	47.998	0	0.143827	0.0264516	0.096439	0.00220529	0.0976759	0	0	39.5366	0.0363883	0	0.000589618	0.0323257	0.00524636	0.00462965	0	0.00142121	0.00327501	0.000325152	0	0.0807348	0	0	0.00301664		11.9309	47.998		0.143827	0.0264516	0.096439	0.00220529	0.0976759			39.5366	0.0363883		0.000589618	0.0323257	0.00524636	0.00462965		0.00142121	0.00327501	0.000325152
11.15	Line_3_17	11.931	47.9598	0	0.0376631	0.0216925	0.0761888	0.00247838	0.0889661	0.0010073	0	39.7123	0.0402974	0	0	0.0321639	0.00292401	0.00260769	0	0.00325687	0.00167463	0.00201458	0	0.0804315	0	0	0.00350966		11.931	47.9598		0.0376631	0.0216925	0.0761888	0.00247838	0.0889661	0.0010073		39.7123	0.0402974			0.0321639	0.00292401	0.00260769		0.00325687	0.00167463	0.00201458
11.2	Line_3_18	11.9456	47.9665	0	0.0581319	0.0253549	0.0961694	0.00128364	0.0573847	0.00293752	0	39.7272	0	0	0	0.0278213	0.000607884	0	0.000491405	0.00380903	0.00299303	0.00243564	0	0.0805962	0	0	0.0006632		11.9456	47.9665		0.0581319	0.0253549	0.0961694	0.00128364	0.0573847	0.00293752		39.7272				0.0278213	0.000607884		0.000491405	0.00380903	0.00299303	0.00243564
11.25	Line_3_19	11.9445	47.9715	0	0.0838975	0.0237467	0.0883229	0.00159312	0.0602461	0	0	39.6802	0.020016	0	0.000363901	0.0334317	0.00171074	0.00207103	0	0.0010245	0.00402757	0.000745361	0	0.0820502	0	0	0.000570258		11.9445	47.9715		0.0838975	0.0237467	0.0883229	0.00159312	0.0602461			39.6802	0.020016		0.000363901	0.0334317	0.00171074	0.00207103		0.0010245	0.00402757	0.000745361
11.3	Line_3_20	11.9439	47.9604	0	0.0831844	0.0273856	0.107594	0.00151781	0.0447048	0.00721768	0	39.6783	0	0	0	0.0434533	0.00176732	0.0075329	0	0.000296217	0.00179203	0.000262034	0	0.0846786	0	0.00286843	0.00313871		11.9439	47.9604		0.0831844	0.0273856	0.107594	0.00151781	0.0447048	0.00721768		39.6783				0.0434533	0.00176732	0.0075329		0.000296217	0.00179203	0.000262034
11.35	Line_3_21	11.9119	47.9557	0.0755885	0.0858837	0.0300811	0.0778967	0.00171671	0.116448	0.00203388	0	39.5661	0.0331199	0	0	0.038105	0.00327321	0.0102948	0	0.000852796	0.00145105	0.00096052	0	0.0866227	0	0	0.0019575		11.9119	47.9557	0.0755885	0.0858837	0.0300811	0.0778967	0.00171671	0.116448	0.00203388		39.5661	0.0331199			0.038105	0.00327321	0.0102948		0.000852796	0.00145105	0.00096052
11.4	Line_3_22	11.9425	47.9377	0	0.0133004	0.0297815	0.0722556	0.00188745	0.04774	0.00463836	0	39.7884	0.0270893	0	0	0.0340365	0.00469236	0.00641207	0	0.000771808	0.000709092	0.000490354	0	0.0855781	0	0.000587527	0.00144721		11.9425	47.9377		0.0133004	0.0297815	0.0722556	0.00188745	0.04774	0.00463836		39.7884	0.0270893			0.0340365	0.00469236	0.00641207		0.000771808	0.000709092	0.000490354
11.45	Line_3_23	11.9206	47.9695	0	0.0584334	0.0204943	0.0735953	0.000754244	0.119737	0	0	39.6419	0.0573431	0	0.000203845	0.0321148	0.00364642	0.00955648	0	0.000598017	0.000824682	0.00123453	0	0.0835532	0	0	0.00586012		11.9206	47.9695		0.0584334	0.0204943	0.0735953	0.000754244	0.119737			39.6419	0.0573431		0.000203845	0.0321148	0.00364642	0.00955648		0.000598017	0.000824682	0.00123453
11.5	Line_3_24	11.938	47.9674	0	0.0661429	0.0296014	0.108999	0.000486251	0.0589722	0	0	39.687	0.0169531	0	0	0.0321794	0	0.00261467	0	0.000841361	0.00143398	0.00117736	0	0.0837495	0	0	0.00443468		11.938	47.9674		0.0661429	0.0296014	0.108999	0.000486251	0.0589722			39.687	0.0169531			0.0321794		0.00261467		0.000841361	0.00143398	0.00117736
11.55	Line_3_25	11.9542	47.9678	0	0.0934429	0.0260562	0.0662164	0.000269409	0.0551622	0	0	39.6949	0.00572561	0.000771747	0.000341892	0.0331725	0	0.00339601	0.000599036	0.00359998	0.00173526	0.00195606	0	0.0860367	0	0.00302889	0.00168712		11.9542	47.9678		0.0934429	0.0260562	0.0662164	0.000269409	0.0551622			39.6949	0.00572561	0.000771747	0.000341892	0.0331725		0.00339601	0.000599036	0.00359998	0.00173526	0.00195606
11.6	Line_3_26	11.9509	47.9399	0	0.0395429	0.0234031	0.0785481	0.000446577	0.0380493	0	0	39.7722	0	0.00519382	0	0.0328929	0.00403784	0.00451115	0	0.00124074	0.00170775	0.0013727	0	0.0876604	0	0.015541	0.00286843		11.9509	47.9399		0.0395429	0.0234031	0.0785481	0.000446577	0.0380493			39.7722		0.00519382		0.0328929	0.00403784	0.00451115		0.00124074	0.00170775	0.0013727
11.65	Line_3_27	11.9425	47.9658	0	0.0852924	0.0253055	0.0773545	0.00182531	0.0656454	0	0	39.6673	0.0210311	0	0.00247251	0.032384	0.0103509	0.00493064	0	0.000620806	0.00316672	0.00103259	0	0.0905804	0	0	0.00243539		11.9425	47.9658		0.0852924	0.0253055	0.0773545	0.00182531	0.0656454			39.6673	0.0210311		0.00247251	0.032384	0.0103509	0.00493064		0.000620806	0.00316672	0.00103259
11.7	Line_3_28	11.9406	47.9857	0	0.115157	0.0258471	0.0847755	0.00158777	0.0850092	0	0	39.6122	0.00958451	0	0.00091325	0.033847	0.00630664	0.00362036	0	0.000317006	0.00160231	0.000608127	0	0.0893623	0	0	0.00305252		11.9406	47.9857		0.115157	0.0258471	0.0847755	0.00158777	0.0850092			39.6122	0.00958451		0.00091325	0.033847	0.00630664	0.00362036		0.000317006	0.00160231	0.000608127
11.75	Line_3_29	11.9358	47.9804	0	0.104604	0.0247529	0.0754293	0.00114185	0.0960866	0	0	39.6139	0.0203175	0	0.00305569	0.0370126	0.00648755	0.00355682	0	0.00160686	0.00231169	0.00185706	0	0.0888402	0	0	0.00291955		11.9358	47.9804		0.104604	0.0247529	0.0754293	0.00114185	0.0960866			39.6139	0.0203175		0.00305569	0.0370126	0.00648755	0.00355682		0.00160686	0.00231169	0.00185706
11.8	Line_3_30	11.9334	47.9751	0	0.0767735	0.0255254	0.0664856	0.00231886	0.109202	0	0	39.6521	0.00822296	0	4.92876e-05	0.0405228	0.00914094	0.00635973	0	0.000844155	0.00233286	0.00121739	0	0.0883078	0	0	0.00200337		11.9334	47.9751		0.0767735	0.0255254	0.0664856	0.00231886	0.109202			39.6521	0.00822296		4.92876e-05	0.0405228	0.00914094	0.00635973		0.000844155	0.00233286	0.00121739
11.85	Line_3_31	11.9214	47.9412	0.0914995	0.101839	0.024018	0.0670124	0.00167352	0.07774	0	0	39.5713	0.0559904	0	9.51385e-05	0.0398455	0.00738792	0.00426399	9.0031e-05	0.000852496	0.00229195	0.00184045	0	0.0867926	0	0	0.00293754		11.9214	47.9412	0.0914995	0.101839	0.024018	0.0670124	0.00167352	0.07774			39.5713	0.0559904		9.51385e-05	0.0398455	0.00738792	0.00426399	9.0031e-05	0.000852496	0.00229195	0.00184045
11.9	Line_3_32	11.9259	47.9385	0.0478894	0.0646053	0.0280733	0.0903861	0.00271811	0.0636988	0.00242225	0	39.6467	0.0297666	0.000123632	0.000236195	0.0411805	0.00605854	0.00570868	0	0.00181407	0.00444775	0.00184382	0	0.0896383	0	0.00304835	0.00528524		11.9259	47.9385	0.0478894	0.0646053	0.0280733	0.0903861	0.00271811	0.0636988	0.00242225		39.6467	0.0297666	0.000123632	0.000236195	0.0411805	0.00605854	0.00570868		0.00181407	0.00444775	0.00184382
11.95	Line_3_33	11.9441	47.9578	0	0.0953998	0.0224798	0.0861028	0.00220074	0.0484691	0	0	39.6542	0.0203808	0	0.00261335	0.0395794	0.0126465	0.00722989	0.000446414	0.000594112	0.00481592	0.00189641	0	0.094536	0	0	0.00455202		11.9441	47.9578		0.0953998	0.0224798	0.0861028	0.00220074	0.0484691			39.6542	0.0203808		0.00261335	0.0395794	0.0126465	0.00722989	0.000446414	0.000594112	0.00481592	0.00189641
12	Line_3_34	11.9386	47.948	0	0.0592249	0.0227161	0.106635	0.0018601	0.0471972	0	0	39.6957	0	0	0.000788194	0.0449332	0.0204693	0.00372221	0	0.000709332	0.0046379	0.00175343	0	0.0941162	0	0.00505837	0.00386798		11.9386	47.948		0.0592249	0.0227161	0.106635	0.0018601	0.0471972			39.6957			0.000788194	0.0449332	0.0204693	0.00372221		0.000709332	0.0046379	0.00175343
12.05	Line_3_35	11.9404	47.9343	0	0.025336	0.0179	0.0925939	0.0017803	0.0433395	0	0	39.7575	0	0.000731263	0.00022615	0.0417619	0.0366451	0.00171672	0	0.00103767	0.00371858	0.000973359	0	0.0943158	0	0.00231482	0.00337485		11.9404	47.9343		0.025336	0.0179	0.0925939	0.0017803	0.0433395			39.7575		0.000731263	0.00022615	0.0417619	0.0366451	0.00171672		0.00103767	0.00371858	0.000973359
12.1	Line_3_36	11.9403	47.9573	0	0.0724578	0.0319241	0.116016	0.0015762	0.0412027	0	0	39.6778	0	0.00224227	0	0.0444669	0.00782848	0.000382272	0	0.000440461	0.00296437	0.00176886	0	0.0976823	0	0.00186334	0.00184724		11.9403	47.9573		0.0724578	0.0319241	0.116016	0.0015762	0.0412027			39.6778		0.00224227		0.0444669	0.00782848	0.000382272		0.000440461	0.00296437	0.00176886
12.15	Line_3_37	11.8951	47.8896	0.309281	0.153073	0.027819	0.122099	0.00179757	0.0360792	0	0	39.3942	0.0175879	0	0.00052095	0.0380869	0.00543042	0.00232652	0.00112599	2.81326e-05	0.00291007	0.000701395	0	0.097459	0	0	0.00486408		11.8951	47.8896	0.309281	0.153073	0.027819	0.122099	0.00179757	0.0360792			39.3942	0.0175879		0.00052095	0.0380869	0.00543042	0.00232652	0.00112599	2.81326e-05	0.00291007	0.000701395
12.2	Line_3_38	11.9458	47.9602	0	0.114758	0.0270993	0.0874639	0.00179098	0.038167	0	0	39.6262	0.0284009	0	0.00240613	0.039013	0.0152397	0.00139767	0.000420953	0.00121767	0.00256719	0.00227001	0	0.0979544	0	0.00250537	0.00508445		11.9458	47.9602		0.114758	0.0270993	0.0874639	0.00179098	0.038167			39.6262	0.0284009		0.00240613	0.039013	0.0152397	0.00139767	0.000420953	0.00121767	0.00256719	0.00227001
12.25	Line_3_39	11.9398	47.9485	0	0.0533228	0.0266923	0.0937654	0.00146138	0.0519091	0	0	39.7083	0.00760235	0.000334627	0	0.0435542	0.0122212	0.00245026	0	0.000740221	0.00361919	0.00186686	0	0.0966274	0	0.00370432	0.00359716		11.9398	47.9485		0.0533228	0.0266923	0.0937654	0.00146138	0.0519091			39.7083	0.00760235	0.000334627		0.0435542	0.0122212	0.00245026		0.000740221	0.00361919	0.00186686
12.3	Line_3_40	11.9441	47.9467	0	0.0891816	0.0229422	0.0775094	0.00207975	0.0323161	0	0	39.6636	0.0522348	0	6.07415e-05	0.0459908	0.0154655	0.00263337	0	0.000587509	0.00326567	0.00205308	0	0.096494	0	0	0.00282536		11.9441	47.9467		0.0891816	0.0229422	0.0775094	0.00207975	0.0323161			39.6636	0.0522348		6.07415e-05	0.0459908	0.0154655	0.00263337		0.000587509	0.00326567	0.00205308
12.35	Line_3_41	11.9338	47.9527	0	0.0775684	0.0290865	0.0988205	0.0025711	0.0501284	0	0	39.6479	0.0385669	0	4.99576e-05	0.0431414	0.0153035	0.00221347	0	0.00166693	0.00302553	0.000955062	0	0.0974457	0	0	0.0050299		11.9338	47.9527		0.0775684	0.0290865	0.0988205	0.0025711	0.0501284			39.6479	0.0385669		4.99576e-05	0.0431414	0.0153035	0.00221347		0.00166693	0.00302553	0.000955062
12.4	Line_3_42	11.9345	47.933	0.0160119	0.0387892	0.0267782	0.0909076	0.00275956	0.0425498	0.00125538	0	39.7148	0.0294591	0	0.000494366	0.0446947	0.0138342	0.00260187	0	0.00112118	0.00233387	0.000232448	0	0.0965102	0	0	0.00730776		11.9345	47.933	0.0160119	0.0387892	0.0267782	0.0909076	0.00275956	0.0425498	0.00125538		39.7148	0.0294591		0.000494366	0.0446947	0.0138342	0.00260187		0.00112118	0.00233387	0.000232448
12.45	Line_3_43	11.9375	47.9584	0	0.0923842	0.0339329	0.106623	0.00137242	0.0443968	0	0	39.6369	0.0206442	0	0.000498947	0.0403809	0.0154432	0.00265383	0	0.0015918	0.00240421	0.00122814	0	0.0953675	0	0	0.00822142		11.9375	47.9584		0.0923842	0.0339329	0.106623	0.00137242	0.0443968			39.6369	0.0206442		0.000498947	0.0403809	0.0154432	0.00265383		0.0015918	0.00240421	0.00122814
12.5	Line_3_44	11.9467	47.966	0	0.120293	0.0260852	0.0898418	0.00158011	0.0434483	0	0	39.622	0.0197656	0	0.00123126	0.043392	0.0104829	0.00368842	0	0.00168393	0.00271278	0.000919968	0	0.0939697	0	0	0.00629248		11.9467	47.966		0.120293	0.0260852	0.0898418	0.00158011	0.0434483			39.622	0.0197656		0.00123126	0.043392	0.0104829	0.00368842		0.00168393	0.00271278	0.000919968
12.55	Line_3_45	11.929	47.9488	0.0271962	0.0752538	0.0280821	0.104331	0.0019033	0.0591199	0	0	39.6384	0.0171899	0	0.00129404	0.0480605	0.0151352	0.00296227	0	0.00161001	0.00338176	0.00166523	0	0.091829	0	0	0.0047798		11.929	47.9488	0.0271962	0.0752538	0.0280821	0.104331	0.0019033	0.0591199			39.6384	0.0171899		0.00129404	0.0480605	0.0151352	0.00296227		0.00161001	0.00338176	0.00166523
12.6	Line_3_46	11.9476	47.9538	0	0.0785473	0.0234544	0.0742271	0.00166851	0.0470118	0	0	39.695	0.0148042	0	0.00107183	0.0468825	0.0133724	0.00229765	0	0.00150979	0.00333986	0.00108739	0	0.0917325	0	0	0.00253379		11.9476	47.9538		0.0785473	0.0234544	0.0742271	0.00166851	0.0470118			39.695	0.0148042		0.00107183	0.0468825	0.0133724	0.00229765		0.00150979	0.00333986	0.00108739
12.65	Line_3_47	11.9293	47.941	0.0678036	0.0931866	0.0250287	0.0934705	0.0016029	0.0546596	0	0	39.6095	0.0151861	0	0.00135572	0.0491609	0.0157635	0.00296627	0	0.00065019	0.00347255	0.00119635	0	0.0924647	0	0	0.00212498		11.9293	47.941	0.0678036	0.0931866	0.0250287	0.0934705	0.0016029	0.0546596			39.6095	0.0151861		0.00135572	0.0491609	0.0157635	0.00296627		0.00065019	0.00347255	0.00119635
12.7	Line_3_48	11.9351	47.9549	0.0278866	0.101737	0.0289067	0.0816697	0.00132885	0.0619003	0	0	39.6154	0.0165438	0	0.00165683	0.0527307	0.0206385	0.00177781	0	0.00068254	0.00304653	0.000906102	0	0.0910378	0	0.00117682	0.000947746		11.9351	47.9549	0.0278866	0.101737	0.0289067	0.0816697	0.00132885	0.0619003			39.6154	0.0165438		0.00165683	0.0527307	0.0206385	0.00177781		0.00068254	0.00304653	0.000906102
12.75	Line_3_49	11.9342	47.9679	0	0.104064	0.023851	0.094866	0.00138844	0.0724712	0	0	39.609	0.0157371	0	0	0.0584212	0.0199512	0.00145161	0	0.000860196	0.00254699	0.00170431	0	0.0903218	0	0	0.00123279		11.9342	47.9679		0.104064	0.023851	0.094866	0.00138844	0.0724712			39.609	0.0157371			0.0584212	0.0199512	0.00145161		0.000860196	0.00254699	0.00170431
12.8	Line_3_50	11.9406	47.9659	0	0.113037	0.0258124	0.0713346	0.00191706	0.0740425	0	0	39.6161	0	0	0	0.0676926	0.0251964	0.00274331	0	0.000391638	0.00308997	0.00126862	0	0.0886743	0	0.00151106	0.000688268		11.9406	47.9659		0.113037	0.0258124	0.0713346	0.00191706	0.0740425			39.6161				0.0676926	0.0251964	0.00274331		0.000391638	0.00308997	0.00126862
12.85	Line_3_51	11.9321	47.9369	0	0.0267151	0.0174591	0.0970018	0.000923923	0.0637931	0	0	39.7312	0	0	0	0.0647768	0.0241176	0.00220308	0	0.00031372	0.00345517	0.00150768	0	0.0863019	0	0.0084271	0.00281607		11.9321	47.9369		0.0267151	0.0174591	0.0970018	0.000923923	0.0637931			39.7312				0.0647768	0.0241176	0.00220308		0.00031372	0.00345517	0.00150768
12.9	Line_3_52	11.9373	47.9621	0	0.105284	0.027043	0.0744057	0.00166519	0.0756106	0	0	39.6202	0	0	0	0.0702381	0.0289309	0.00224995	0	0.000404061	0.00303724	0.001702	0	0.0835246	0	0.00451546	0.00179386		11.9373	47.9621		0.105284	0.027043	0.0744057	0.00166519	0.0756106			39.6202				0.0702381	0.0289309	0.00224995		0.000404061	0.00303724	0.001702
12.95	Line_3_53	11.9296	47.99	0.0296007	0.189019	0.0267118	0.0734504	0.00157443	0.110088	0	0	39.4571	0	0	0	0.0654966	0.0278849	0.00413456	0	0.000619906	0.00241183	0.00208255	0	0.0818393	0	0.00829928	0.000131314		11.9296	47.99	0.0296007	0.189019	0.0267118	0.0734504	0.00157443	0.110088			39.4571				0.0654966	0.0278849	0.00413456		0.000619906	0.00241183	0.00208255
13	Line_3_54	11.9398	47.976	0	0.124102	0.0258338	0.0796904	0.00250577	0.077823	0	0	39.5986	0	0	3.46555e-05	0.0601715	0.0238154	0.00210391	0	0.000556888	0.00346694	0.00205146	0	0.0810665	0	0.00188814	0.000571197		11.9398	47.976		0.124102	0.0258338	0.0796904	0.00250577	0.077823			39.5986			3.46555e-05	0.0601715	0.0238154	0.00210391		0.000556888	0.00346694	0.00205146
13.05	Line_3_55	11.9444	47.9711	0	0.106135	0.0178577	0.0720667	0.00196612	0.0744183	0	0	39.645	0	0	0	0.0593896	0.0194896	0.000696189	0.00162016	0.000698835	0.00271263	0.00169898	0	0.0784619	0	0.000168892	0.00206741		11.9444	47.9711		0.106135	0.0178577	0.0720667	0.00196612	0.0744183			39.645				0.0593896	0.0194896	0.000696189	0.00162016	0.000698835	0.00271263	0.00169898
13.1	Line_3_56	11.9365	47.9631	0.0564585	0.111362	0.0208919	0.0847723	0.00223315	0.0696579	0	0	39.611	0	0	0.000266788	0.0484411	0.0134151	0.00100744	0	0.000362099	0.00206268	0.00163074	0	0.0761499	0	0	0.000610594		11.9365	47.9631	0.0564585	0.111362	0.0208919	0.0847723	0.00223315	0.0696579			39.611			0.000266788	0.0484411	0.0134151	0.00100744		0.000362099	0.00206268	0.00163074
13.15	Line_3_57	11.9396	47.9876	0	0.114281	0.0278938	0.0795608	0.0013017	0.0923204	0	0	39.6162	1.92557e-05	0	0.00120701	0.0427862	0.0128947	0.00179198	0	0.000467985	0.00321691	0.00184037	0	0.076805	0	0	0.000204902		11.9396	47.9876		0.114281	0.0278938	0.0795608	0.0013017	0.0923204			39.6162	1.92557e-05		0.00120701	0.0427862	0.0128947	0.00179198		0.000467985	0.00321691	0.00184037
13.2	Line_3_58	11.9438	47.9877	0	0.137102	0.0293867	0.0884176	0.00122368	0.0729791	0	0	39.5937	0	0	0	0.044785	0.0138808	0.00152682	0	0.000197994	0.00320884	0.00304188	0	0.0743955	0	0.00307761	0.00162949		11.9438	47.9877		0.137102	0.0293867	0.0884176	0.00122368	0.0729791			39.5937				0.044785	0.0138808	0.00152682		0.000197994	0.00320884	0.00304188
13.25	Line_3_59	11.9532	47.9797	0	0.122227	0.0244272	0.0798078	0.00128821	0.0516963	0	0	39.6495	0.00632013	0	0	0.0368399	0.0117897	0.000902396	0	0.00102622	0.00265988	0.00260431	0	0.0742615	0	0	0.0017279		11.9532	47.9797		0.122227	0.0244272	0.0798078	0.00128821	0.0516963			39.6495	0.00632013			0.0368399	0.0117897	0.000902396		0.00102622	0.00265988	0.00260431
13.3	Line_3_60	11.9503	47.9754	0	0.121622	0.0234076	0.0717256	0.00159942	0.0485276	0	0	39.6402	0.0414977	0	0	0.0315508	0.0118452	0.00159862	0	0.00141954	0.00148944	0.00160849	0	0.0758529	0	0	0.000334112		11.9503	47.9754		0.121622	0.0234076	0.0717256	0.00159942	0.0485276			39.6402	0.0414977			0.0315508	0.0118452	0.00159862		0.00141954	0.00148944	0.00160849
13.35	Line_3_61	11.9189	47.9596	0.0496236	0.110319	0.029821	0.109232	0.00216714	0.0644168	0	0	39.5545	0.065119	0	0.000176368	0.033758	0.0182555	0.00377053	0	0.0023413	0.00137915	0.000583538	0	0.0748243	0	0	0.00124752		11.9189	47.9596	0.0496236	0.110319	0.029821	0.109232	0.00216714	0.0644168			39.5545	0.065119		0.000176368	0.033758	0.0182555	0.00377053		0.0023413	0.00137915	0.000583538
13.4	Line_3_62	11.9356	47.9585	0	0.0784564	0.0218165	0.0676777	0.00300753	0.0663392	0	0	39.6624	0.0612052	0	0.000865615	0.0320293	0.0234019	0.00351363	0	0.00252794	0.00165267	0.000660192	0	0.075755	0	0.00391493	0.000723069		11.9356	47.9585		0.0784564	0.0218165	0.0676777	0.00300753	0.0663392			39.6624	0.0612052		0.000865615	0.0320293	0.0234019	0.00351363		0.00252794	0.00165267	0.000660192
13.45	Line_3_63	11.938	47.9668	0	0.119455	0.0280706	0.0761446	0.00256386	0.05162	0	0	39.6037	0.0628838	0	0.000115559	0.0340261	0.0355623	0.0025567	0	0.000711107	0.00174625	0.000581549	0	0.0740088	0	0	0.00144228		11.938	47.9668		0.119455	0.0280706	0.0761446	0.00256386	0.05162			39.6037	0.0628838		0.000115559	0.0340261	0.0355623	0.0025567		0.000711107	0.00174625	0.000581549
13.5	Line_3_64	11.932	47.9618	0.0400093	0.0986711	0.0279316	0.0890204	0.00222443	0.0654088	0	0	39.618	0.0285813	0	0	0.0379401	0.0175585	0.00142056	0	0.000551132	0.00273576	0.00228222	0	0.0732997	0	0	0.000535989		11.932	47.9618	0.0400093	0.0986711	0.0279316	0.0890204	0.00222443	0.0654088			39.618	0.0285813			0.0379401	0.0175585	0.00142056		0.000551132	0.00273576	0.00228222
13.55	Line_3_65	11.9406	47.9791	0	0.129898	0.0177388	0.0723059	0.00216351	0.0737785	0	0	39.5946	0.041096	0	0	0.0385379	0.0271643	0.00453551	0	0.000653719	0.00210256	0.00109145	0	0.0746917	0	0	0		11.9406	47.9791		0.129898	0.0177388	0.0723059	0.00216351	0.0737785			39.5946	0.041096			0.0385379	0.0271643	0.00453551		0.000653719	0.00210256	0.00109145
13.6	Line_3_66	11.9288	47.9795	0	0.104481	0.0263404	0.084851	0.00146637	0.0942083	0	0	39.5973	0.0331379	0	0.000162833	0.0338414	0.0320488	0.00394899	0	0.00105354	0.00269283	0.00128911	0	0.0748698	0	0	1.67136e-05		11.9288	47.9795		0.104481	0.0263404	0.084851	0.00146637	0.0942083			39.5973	0.0331379		0.000162833	0.0338414	0.0320488	0.00394899		0.00105354	0.00269283	0.00128911
13.65	Line_3_67	11.9347	47.9616	0	0.0551036	0.022365	0.0766115	0.00184008	0.073846	0	0	39.698	0.0491254	0	0.000710172	0.0268773	0.0150364	0.00156768	0	0.000141884	0.000584811	0.000788722	0	0.0755007	0	0.00557828	0		11.9347	47.9616		0.0551036	0.022365	0.0766115	0.00184008	0.073846			39.698	0.0491254		0.000710172	0.0268773	0.0150364	0.00156768		0.000141884	0.000584811	0.000788722
13.7	Line_3_68	11.9519	47.9674	0	0.0769409	0.0235763	0.0761675	0.000658358	0.0482553	0	0	39.7197	0.0219865	0	0	0.0204153	0.00677413	0.00368357	0	0.000534504	0.00274296	0.00292896	0	0.0751419	0	0	0.00121565		11.9519	47.9674		0.0769409	0.0235763	0.0761675	0.000658358	0.0482553			39.7197	0.0219865			0.0204153	0.00677413	0.00368357		0.000534504	0.00274296	0.00292896
13.75	Line_3_69	11.931	47.9321	0.0924513	0.0649715	0.0310879	0.104426	0.00215961	0.0401253	0	0	39.6691	0	8.81059e-05	0	0.020172	0.00555277	0.00562078	0.00190543	0.000363471	0.008347	0.00325949	0	0.0758268	0	0.00787003	0.00360544		11.931	47.9321	0.0924513	0.0649715	0.0310879	0.104426	0.00215961	0.0401253			39.6691		8.81059e-05		0.020172	0.00555277	0.00562078	0.00190543	0.000363471	0.008347	0.00325949
13.8	Line_3_70	11.9585	47.969	0	0.127333	0.0238432	0.0820337	0.00273359	0.0300138	0	0	39.6588	0	0.00285806	0.00132976	0.0254573	0.0143622	0.00514564	0.000799353	0.000722331	0.00662758	0.00184567	0	0.0741388	0	0.010991	0.00350555		11.9585	47.969		0.127333	0.0238432	0.0820337	0.00273359	0.0300138			39.6588		0.00285806	0.00132976	0.0254573	0.0143622	0.00514564	0.000799353	0.000722331	0.00662758	0.00184567
13.85	Line_3_71	11.9354	47.9531	0.0395291	0.0892725	0.0311579	0.0968625	0.00184824	0.0536327	0	0	39.6458	0	0.00305755	0.000499246	0.0332397	0.0231212	0.00210067	0	0.00119262	0.00420713	0.00165391	0	0.071657	0	0.0108759	0.00183449		11.9354	47.9531	0.0395291	0.0892725	0.0311579	0.0968625	0.00184824	0.0536327			39.6458		0.00305755	0.000499246	0.0332397	0.0231212	0.00210067		0.00119262	0.00420713	0.00165391
13.9	Line_3_72	11.9357	47.9493	0	0.0250972	0.0257608	0.0878772	0.00141295	0.0673675	0	0	39.7536	0	0.000182875	0.00106333	0.0399463	0.0280541	0.000423804	0	0.000657365	0.00348602	0.00143513	0	0.0698676	0	0.00731239	0.00147794		11.9357	47.9493		0.0250972	0.0257608	0.0878772	0.00141295	0.0673675			39.7536		0.000182875	0.00106333	0.0399463	0.0280541	0.000423804		0.000657365	0.00348602	0.00143513
13.95	Line_3_73	11.935	47.9762	0	0.107074	0.0255418	0.0741912	0.00199447	0.0852592	0	0	39.6154	0.0180401	0	0.0010051	0.0382535	0.0462235	5.41347e-05	7.39217e-05	7.98543e-05	0.00176054	0.00172903	0	0.0712641	0	0.000918847	0		11.935	47.9762		0.107074	0.0255418	0.0741912	0.00199447	0.0852592			39.6154	0.0180401		0.0010051	0.0382535	0.0462235	5.41347e-05	7.39217e-05	7.98543e-05	0.00176054	0.00172903
14	Line_3_74	11.9356	47.9611	0	0.0560586	0.0282831	0.0898004	0.00172076	0.0714483	0	0	39.7012	0	0	0	0.0331859	0.0387204	0.000292516	0	0.000292737	0.00122913	0.0017993	0	0.071775	0	0.00724358	0.000309021		11.9356	47.9611		0.0560586	0.0282831	0.0898004	0.00172076	0.0714483			39.7012				0.0331859	0.0387204	0.000292516		0.000292737	0.00122913	0.0017993
14.05	Line_3_75	11.9303	47.951	0.0646458	0.0899475	0.0222359	0.0762011	0.00227118	0.0761078	0	0	39.627	0.010228	0.00144276	0	0.0385604	0.0235541	0.00279322	0	0.000957988	0.00146575	0.00258712	0	0.0731971	0	0.00372619	0.00180962		11.9303	47.951	0.0646458	0.0899475	0.0222359	0.0762011	0.00227118	0.0761078			39.627	0.010228	0.00144276		0.0385604	0.0235541	0.00279322		0.000957988	0.00146575	0.00258712
14.1	Line_3_76	11.9106	47.9221	0	0.100243	0.0254978	0.0961644	0.00324836	0.0604829	0.00522876	0	39.5446	0.0276089	0	0.000985004	0.101288	0.113758	0.00843312	0.000562279	0.000575798	0.00196237	0.00210645	0	0.0723478	0	0	0.00227663		11.9106	47.9221		0.100243	0.0254978	0.0961644	0.00324836	0.0604829	0.00522876		39.5446	0.0276089		0.000985004	0.101288	0.113758	0.00843312	0.000562279	0.000575798	0.00196237	0.00210645
14.15	Line_3_77	11.7833	47.7175	0	0.119035	0.0291286	0.139479	0.00300695	0.0459368	0	0	39.0914	0.0212333	0	9.04684e-05	0.418479	0.544514	0.00342616	0.000908672	0.000452518	0.00338633	0.0029195	0	0.0664995	0	0	0.00940309		11.7833	47.7175		0.119035	0.0291286	0.139479	0.00300695	0.0459368			39.0914	0.0212333		9.04684e-05	0.418479	0.544514	0.00342616	0.000908672	0.000452518	0.00338633	0.0029195
14.2	Line_3_78	11.651	47.4359	0	0.142555	0.0272386	0.0522734	0.00301942	0.0464039	0	0	38.6176	0	0	0	0.892742	1.06573	0.000787814	0.00384151	9.51738e-05	0.000347312	0.00456538	0	0.0522731	0	0	0.0035924		11.651	47.4359		0.142555	0.0272386	0.0522734	0.00301942	0.0464039			38.6176				0.892742	1.06573	0.000787814	0.00384151	9.51738e-05	0.000347312	0.00456538
14.25	Line_3_79	11.653	47.4335	0	0.159692	0.028436	0.0460502	0.00302577	0.0445718	0	0	38.6042	0	0	0	0.941625	1.02282	0.00286752	0.0119205	0.00227838	0	0.00958834	0	0.0350723	0	0	0.00133436		11.653	47.4335		0.159692	0.028436	0.0460502	0.00302577	0.0445718			38.6042				0.941625	1.02282	0.00286752	0.0119205	0.00227838		0.00958834
14.3	Line_3_80	11.6332	47.4747	0.0830898	0.150437	0.0286799	0.174372	0.00251819	0.0429182	0	0	38.5589	0	0.00472095	0	0.758509	1.01828	0.00152743	0.019276	0.00530354	0.00166946	0.012485	0	0.0230258	0	0.00632081	0		11.6332	47.4747	0.0830898	0.150437	0.0286799	0.174372	0.00251819	0.0429182			38.5589		0.00472095		0.758509	1.01828	0.00152743	0.019276	0.00530354	0.00166946	0.012485
14.35	Line_3_81	10.6096	47.1131	0	0.0504156	0.035358	2.37877	0.002512	0.168289	0.00372205	0	35.3113	0.00768772	0.000556484	0.00130595	0.928336	3.34607	0.00405897	0.00490381	0.00161058	0.0115109	0.00417579	0	0.0160485	0	0	0.000746277
14.4	Line_3_82	10.3995	46.1122	0	0.145977	0.0273697	0.996542	0.00246439	0.192314	0.00264998	0	34.4527	0.0295169	0	0.0030336	1.29674	6.27284	0.0119004	0.00319772	0.00335405	0.0299527	0.000209439	0	0.0160266	0	0	0.00154556
14.45	Line_3_83	11.5398	47.502	0	0.128795	0.0266318	0.254276	0.000896948	0.162354	0	0	38.2854	0	0	0.00638841	0.420001	1.6303	0.00653887	0	0.00137548	0.0107384	0.000321909	0	0.0172439	0	0.00268811	0.00417442		11.5398	47.502		0.128795	0.0266318	0.254276	0.000896948	0.162354			38.2854			0.00638841	0.420001	1.6303	0.00653887		0.00137548	0.0107384	0.000321909
14.5	Line_3_84	11.8827	47.9039	0	0.129515	0.0290486	0.109933	0.000320478	0.0681589	0	0	39.4214	0	0.000854068	0	0.0819619	0.324198	0.00165164	0	0.000367677	0.00443737	0.00225351	0	0.0322811	0	0.00302396	0.00404612		11.8827	47.9039		0.129515	0.0290486	0.109933	0.000320478	0.0681589			39.4214		0.000854068		0.0819619	0.324198	0.00165164		0.000367677	0.00443737	0.00225351
14.55	Line_3_85	11.9148	47.9651	0	0.132426	0.0216332	0.0868886	0.00156856	0.0998697	0	0	39.5182	0.0067341	0	0.0016283	0.0630973	0.132122	0.00209807	0	0.000401437	0.00379102	0.00151703	0	0.0443665	0	0	0.00375497		11.9148	47.9651		0.132426	0.0216332	0.0868886	0.00156856	0.0998697			39.5182	0.0067341		0.0016283	0.0630973	0.132122	0.00209807		0.000401437	0.00379102	0.00151703
14.6	Line_3_86	11.8796	47.9873	0.0237442	0.165936	0.0233598	0.141929	0.00119547	0.15087	0	0	39.342	0.0435309	0	0.00111501	0.0674244	0.104997	0.00308877	0	0.00065522	0.00467034	0.00151433	0	0.0525835	0	0.00014439	0.00423543		11.8796	47.9873	0.0237442	0.165936	0.0233598	0.141929	0.00119547	0.15087			39.342	0.0435309		0.00111501	0.0674244	0.104997	0.00308877		0.00065522	0.00467034	0.00151433
14.65	Line_3_87	11.6045	47.9806	0	0.150462	0.0663737	0.846392	0.000987534	0.200219	0	0.00286436	38.4454	0.0815683	0	0	0.0675018	0.48086	0.00181741	0	0.00103909	0.00364824	0.00261081	0	0.0612951	0	0	0.00178474		11.6045	47.9806		0.150462	0.0663737	0.846392	0.000987534	0.200219		0.00286436	38.4454	0.0815683			0.0675018	0.48086	0.00181741		0.00103909	0.00364824	0.00261081
14.7	Line_3_88	10.7955	48.0952	0	0.115022	0.158775	3.5592	0.000391967	0.124314	0.0555245	0.0782694	35.8034	0.3221	0	0.000871608	0.0798132	0.732353	0.003571	0	0.00235228	0.00442416	0.00167559	0	0.0639872	0	0	0.00324099
14.75	Line_3_89	11.3338	47.6463	0	0	0.0498002	1.38384	0.000740417	0.0204448	0.25471	0.110989	37.7915	0.454276	0	0.00184045	0.0499657	0.835136	0.000842988	0.00128786	0.000429952	0.00234342	0.0015173	0	0.058911	0	0	0.00130785
14.8	Line_3_90	11.7877	47.647	0	0	0.00640593	0.163499	0.000557489	0.00316854	0.3336	0.0414847	39.3084	0.251175	0	0.000615414	0.0356481	0.364279	0	0	0.000182019	0.00106475	0.00190489	0	0.0533905	0	0	0		11.7877	47.647			0.00640593	0.163499	0.000557489	0.00316854	0.3336	0.0414847	39.3084	0.251175		0.000615414	0.0356481	0.364279			0.000182019	0.00106475	0.00190489
14.85	Line_3_91	11.8253	47.6531	0.0105828	0	0.0028379	0.0948779	0.000329306	0.000412406	0.357432	0.0205342	39.4369	0.199027	0	0	0.0396924	0.308396	0.000106498	0	0.000148886	0.00178049	0.00166779	0	0.0466597	0	0	0.000234357		11.8253	47.6531	0.0105828		0.0028379	0.0948779	0.000329306	0.000412406	0.357432	0.0205342	39.4369	0.199027			0.0396924	0.308396	0.000106498		0.000148886	0.00178049	0.00166779
14.9	Line_3_92	11.885	47.7312	0	0	0.00583189	0.107907	0.000246222	0	0.358179	0.00271776	39.6387	0.0618261	0	0	0.0330233	0.130285	0	0	0.00122121	0.0011601	0.00103377	0	0.0415608	0	0	0		11.885	47.7312			0.00583189	0.107907	0.000246222		0.358179	0.00271776	39.6387	0.0618261			0.0330233	0.130285			0.00122121	0.0011601	0.00103377
14.95	Line_3_93	11.9119	47.7592	0.00432342	0.0145815	0.0027755	0.0957453	0.000135858	0	0.355771	0	39.7065	0.00586478	0	0	0.0323388	0.070067	0.000491527	0	0.000539605	0.00130152	0.00089194	0	0.0363533	0	0	0.00126224		11.9119	47.7592	0.00432342	0.0145815	0.0027755	0.0957453	0.000135858		0.355771		39.7065	0.00586478			0.0323388	0.070067	0.000491527		0.000539605	0.00130152	0.00089194
15	Line_3_94	11.9117	47.7574	0	0	0.00222676	0.0981238	0	0.00328442	0.36239	0	39.7322	0	0	0	0.0300306	0.0655913	0.000554924	0	0	0.00167807	0.00213031	0	0.031393	0	0	0.00123471		11.9117	47.7574			0.00222676	0.0981238		0.00328442	0.36239		39.7322				0.0300306	0.0655913	0.000554924			0.00167807	0.00213031
15.05	Line_3_95	11.9095	47.7622	0	0.026898	0	0.10071	0.000152947	0.00121078	0.353619	0	39.6816	0.00878345	0.00125597	0	0.0277643	0.0887537	0	0	0.000532707	0.00135333	0.00266274	0	0.0289856	0	0.0040936	0		11.9095	47.7622		0.026898		0.10071	0.000152947	0.00121078	0.353619		39.6816	0.00878345	0.00125597		0.0277643	0.0887537			0.000532707	0.00135333	0.00266274
15.1	Line_3_96	11.9118	47.7564	0	0.00439796	0.000280077	0.0921946	0	0.00130787	0.357433	0	39.7265	0.00426139	0	0	0.0260447	0.0841819	0	0	0.00112507	0.00171541	0.00311301	0	0.0292807	0	0	0		11.9118	47.7564		0.00439796	0.000280077	0.0921946		0.00130787	0.357433		39.7265	0.00426139			0.0260447	0.0841819			0.00112507	0.00171541	0.00311301
15.15	Line_3_97	11.9057	47.7508	0.0322593	0	0.00170138	0.0996727	0	0.0026152	0.347841	0	39.7127	0	0	0	0.0301183	0.078618	0.000274177	0	0	0.00183016	0.0030946	0	0.0303333	0	0.00246774	0		11.9057	47.7508	0.0322593		0.00170138	0.0996727		0.0026152	0.347841		39.7127				0.0301183	0.078618	0.000274177			0.00183016	0.0030946
15.2	Line_3_98	11.9135	47.7624	0	0.0137458	8.44053e-05	0.0928486	1.82589e-05	0.00138226	0.352962	0	39.7159	0.00794597	0	0	0.0268772	0.0753864	0.00163183	0	0	0.00147552	0.00313485	0	0.0306708	0	0	0		11.9135	47.7624		0.0137458	8.44053e-05	0.0928486	1.82589e-05	0.00138226	0.352962		39.7159	0.00794597			0.0268772	0.0753864	0.00163183			0.00147552	0.00313485
[truncated: 63 more columns]

## Sheet: M10 Trecon
MAX		0.0119519	0.0011316	-16.4406	16.9193	46.1181	32.3396	17.9741	9.94272	50.443	53.5167	31.3482	-10.525	5.59818	1.90108				Kim and O'Neil, 1997						Hays and Grossman, 1991
MIN		0.000551211	0.000714544	-206.514	0.572986	2.52796	-6.8915	1.16079	-4.06839	-0.728044	-28.4759	-10.4681	-68.3739	1.39099	-48.9551				-0.9332			13.5381			15.8143
MEAN		0.00495934	0.00089183	-62.6112	7.0922	19.9125	8.75462	7.86627	1.51951	19.6799	33.5999	21.1906	-27.2543	4.3815	-12.806				-2.78064			1.38303			8.41364
TOP CYCLE		0.00709151	0.000989476	-40.1674	10.1688	28.1167	16.1384	11.0307	4.15655	29.3109	43.2815	26.1282	-19.4077	4.95217	-5.90789				-1.77829			8.94957			11.7454
BOTTOM CYCLE		0.00259155	0.000781144	-85.9239	3.91882	11.4502	1.1385	4.60221	-1.20054	9.74587	23.5435	16.0618	-32.4285	4.0052	-17.3547						Dw	-2.8	0.01	Dw	-2.8	0.01				62.0541	69.1505
d	years	Mg/Ca	Sr/Ca	Freitas et al., 2005	Surge and Lohmann, 2008	Mouchi et al., 2013	Klein et al., 1996	Vander Putten et al., 2000	Wannamaker et al., 2008	Takesue et al., 2004	Cléroux et al., 2008	Ederfield and Ganssen	Wannamaker et al., 2008	Takesue et al., 2004	Cléroux et al., 2008		D (mm)	years	d18O trim		alpha	T	T-	T+	T	T-	T+		Surge and Lohmann, 2008	Mouchi et al., 2013	Takesue et al., 2004
0	0.142857	0.00864326	0.000821612	-31.1728	12.324	33.8639	21.3109	13.2475	6.00388	36.0576	47.1616	28.1071	-29.8992	4.18915	-15.1312		15.2	12.7143	-2.336	0.110744	1.0314	11.5203	10.9774	12.0654	13.7028	13.2338	14.1748		40.3345	108.559	123.743
0.05	0.188967	0.00715391	0.000815214	-39.7692	10.2554	28.3478	16.3464	11.1199	4.23085	29.5822	43.4533	26.2159	-30.2991	4.16007	-15.4827		15.2	12.5714	-2.78064	0.0455559	1.03094	13.5381	13.2844	13.7923	15.6156	15.4175	15.8143		33.4394	90.1718	102.158
0.1	0.235077	0.00838732	0.000790293	-32.5391	11.9685	32.916	20.4577	12.8819	5.69919	34.9449	46.5722	27.8065	-31.8567	4.04679	-16.852		15.0451	12.4286	-2.5414	0.110744	1.03119	12.4488	11.9022	12.9975	14.5805	14.106	15.058		39.1496	105.399	120.034
0.15	0.281187	0.0098442	0.000778339	-25.259	13.9919	38.3119	25.314	14.9631	7.43357	41.2791	49.7126	29.4081	-32.6038	3.99245	-17.5088		14.8902	12.2857	-1.9254	0.110744	1.03182	9.68284	9.14711	10.2207	11.9785	11.5204	12.4396		45.8945	123.385	141.148
0.2	0.315118	0.00664634	0.000754831	-43.1143	9.55047	26.4679	14.6545	10.3948	3.6266	27.3754	42.0103	25.4799	-34.0731	3.8856	-18.8005		14.7353	12.1429	-1.9518	0.110744	1.0318	9.80025	9.26405	10.3385	12.0882	11.6294	12.55		31.0895	83.9054	94.802
0.25	0.347722	0.00833358	0.000753763	-32.8313	11.8939	32.717	20.2786	12.8051	5.63522	34.7112	46.4462	27.7422	-34.1398	3.88074	-18.8592		14.5804	12	-1.0695	0.110744	1.03271	5.9302	5.40898	6.45343	8.51438	8.079	8.9527		38.9008	104.736	119.255
0.3	0.380327	0.00782612	0.000768676	-35.687	11.1891	30.8375	18.5871	12.0802	5.0311	32.5049	45.2143	27.1139	-33.2077	3.94853	-18.0398		14.4255	11.8	-1.8724	0.110744	1.03188	9.44744	8.91262	9.98435	11.7589	11.3022	12.2186		36.5515	98.4707	111.9
0.35	0.412931	0.0080504	0.000765784	-34.4027	11.5006	31.6682	19.3347	12.4006	5.2981	33.48	45.7683	27.3965	-33.3885	3.93538	-18.1987		14.2705	11.6	-2.0523	0.110744	1.03169	10.2481	9.71017	10.7882	12.5071	12.0456	12.9716		37.5898	101.24	115.151
0.4	0.476555	0.00801269	0.000745191	-34.6161	11.4482	31.5285	19.209	12.3467	5.2532	33.316	45.6762	27.3495	-34.6756	3.84178	-19.3302		14.1156	11.4	-1.7115	0.110744	1.03204	8.73528	8.20323	9.2694	11.0963	10.6439	11.5517		37.4152	100.774	114.604
0.45	0.568775	0.00648744	0.000714544	-44.2143	9.32977	25.8794	14.1248	10.1678	3.43743	26.6845	41.5359	25.2379	-36.591	3.70247	-21.0141		13.9607	11.2	-1.5493	0.110744	1.03221	8.0211	7.49182	8.55244	10.4347	9.98653	10.8857		30.3539	81.9437	92.4991
0.5	0.660994	0.00840165	0.000726443	-32.4615	11.9884	32.9691	20.5055	12.9024	5.71625	35.0072	46.6057	27.8235	-35.8473	3.75656	-20.3603		13.8058	11	-0.9332	0.110744	1.03285	5.34207	4.8231	5.86302	7.97895	7.54719	8.41364		39.216	105.576	120.241
0.55	0.610357	0.00846519	0.000737676	-32.119	12.0767	33.2044	20.7173	12.9931	5.7919	35.2835	46.7534	27.8989	-35.1453	3.80762	-19.7431		13.6509	10.8333											39.5102	106.36	121.162
0.6	0.702577	0.00828648	0.000739103	-33.0889	11.8284	32.5425	20.1216	12.7378	5.57914	34.5064	46.335	27.6855	-35.056	3.81411	-19.6646		13.496	10.6667	-1.8723	0.110744	1.03188	9.447	8.91218	9.98391	11.7585	11.3018	12.2182		38.6828	104.154	118.572
0.65	0.794797	0.00608917	0.000730285	-47.0941	8.77662	24.4043	12.7972	9.59881	2.96329	24.9529	40.2936	24.6044	-35.6072	3.77402	-20.1492		13.3411	10.5	-1.537	0.110744	1.03223	7.9671	7.43802	8.49823	10.3847	9.93694	10.8355		28.51	77.0268	86.7271
0.7	0.87208	0.00705023	0.000722801	-40.4327	10.1114	27.9638	16.0008	10.9718	4.10742	29.1315	43.1671	26.0699	-36.0749	3.74001	-20.5604		13.1862	10.3333											32.9594	88.8918	100.656
0.75	0.91819	0.00723505	0.00075139	-39.2565	10.3681	28.6483	16.6168	11.2358	4.32744	29.935	43.6745	26.3286	-34.2882	3.86995	-18.9896		13.0313	10.1667											33.815	91.1734	103.334
0.8	0.9643	0.00859646	0.00077282	-31.4196	12.259	33.6906	21.1549	13.1807	5.94817	35.8542	47.0551	28.0528	-32.9487	3.96736	-17.8121		12.8764	10	-1.2201	0.110744	1.03255	6.58303	6.0593	7.10878	9.11117	8.67179	9.55349		40.1179	107.981	123.065
0.85	1.00884	0.0086081	0.000766674	-31.3581	12.2751	33.7337	21.1937	13.1973	5.96203	35.9048	47.0817	28.0663	-33.3328	3.93943	-18.1498		12.7215	9.83333	-1.4301	0.110744	1.03234	7.49863	6.97137	8.02794	9.95243	9.50747	10.4003		40.1718	108.125	123.233
0.9	1.04798	0.00797613	0.000763891	-34.824	11.3974	31.3931	19.0871	12.2945	5.20968	33.1571	45.5866	27.3038	-33.5068	3.92678	-18.3027		12.5665	9.66667	-1.7191	0.110744	1.03204	8.76884	8.23665	9.30309	11.1275	10.6748	11.5831		37.246	100.323	114.074
0.95	1.08712	0.00722936	0.000750356	-39.2923	10.3602	28.6273	16.5979	11.2277	4.32067	29.9103	43.6591	26.3208	-34.3527	3.86526	-19.0463		12.4116	9.5	-1.6427	0.110744	1.03212	8.43189	7.90102	8.96483	10.8149	10.3643	11.2684		33.7887	91.1032	103.252
1	1.12626	0.00730952	0.000758413	-38.7911	10.4716	28.9242	16.8651	11.3422	4.4161	30.2588	43.8753	26.431	-33.8492	3.90188	-18.6037		12.2567	9.33333	-1.5477	0.110744	1.03221	8.01408	7.48482	8.54539	10.4282	9.98008	10.8792		34.1598	92.0929	104.413
1.05	1.1654	0.00748138	0.000749951	-37.7347	10.7102	29.5607	17.4379	11.5877	4.62069	31.006	44.3309	26.6634	-34.3781	3.86341	-19.0686		12.1018	9.16667	-1.7697	0.110744	1.03198	8.99245	8.4594	9.52758	11.3353	10.8813	11.7922		34.9554	94.2145	106.904
1.1	1.20454	0.00750334	0.000728343	-37.6015	10.7407	29.642	17.5111	11.6191	4.64683	31.1015	44.3884	26.6927	-35.7285	3.7652	-20.2559		11.9469	9	-1.4852	0.110744	1.03228	7.73989	7.2117	8.27014	10.1749	9.72849	10.6243		35.0571	94.4856	107.222
1.15	1.24369	0.00618616	0.00077489	-46.3757	8.91133	24.7636	13.1205	9.73737	3.07876	25.3746	40.6035	24.7624	-32.8194	3.97677	-17.6983		11.792	8.90909	-1.5255	0.110744	1.03224	7.91662	7.38774	8.44755	10.3381	9.8906	10.7885		28.9591	78.2242	88.1328
1.2	1.31767	0.00560002	0.000788905	-50.9005	8.09725	22.5927	11.1667	8.90003	2.38097	22.8262	38.6516	23.767	-31.9434	4.04048	-16.9283		11.6371	8.81818	-1.58907	0.0455559	1.03217	8.19587	7.95175	8.44043	10.5963	10.4112	10.7819		26.2455	70.9879	79.6379
1.25	1.39837	0.00731907	0.000857404	-38.7317	10.4848	28.9595	16.8969	11.3558	4.42746	30.3003	43.9009	26.4441	-27.6622	4.35184	-13.1646		11.4822	8.72727	-1.65153	0.0455559	1.03211	8.47079	8.22617	8.71584	10.8509	10.6651	11.0373		34.204	92.2107	104.552
1.3	1.47906	0.00879168	0.00081017	-30.3989	12.5301	34.4136	21.8056	13.4595	6.18057	36.7029	47.4954	28.2773	-30.6144	4.13713	-15.7599		11.3273	8.63636	-1.89371	0.0455559	1.03186	9.54204	9.29551	9.78901	11.8471	11.6587	12.0361		41.0216	110.391	125.894
1.35	1.55975	0.00567079	0.000765752	-50.3297	8.19554	22.8548	11.4026	9.00113	2.46523	23.1339	38.8978	23.8926	-33.3905	3.93524	-18.2004		11.1724	8.54545	-1.82232	0.0455559	1.03193	9.22539	8.97942	9.47179	11.552	11.3643	11.7402		26.5731	71.8616	80.6636
1.4	1.64044	0.00851714	0.000781139	-31.8409	12.1488	33.3968	20.8905	13.0673	5.85374	35.5093	46.8734	27.9601	-32.4288	4.00518	-17.355		11.0174	8.45455	-1.78689	0.0455559	1.03197	9.06852	8.82284	9.31464	11.406	11.2187	11.5938		39.7506	107.002	121.915
1.45	1.72114	0.0119519	0.000796778	-16.4406	16.9193	46.1181	32.3396	17.9741	9.94272	50.443	53.5167	31.3482	-31.4514	4.07626	-16.4957		10.8625	8.36364	-1.70488	0.0455559	1.03205	8.70604	8.461	8.95151	11.0692	10.8828	11.2561		55.6522	149.406	171.694
1.5	1.77318	0.00871326	0.000784809	-30.8061	12.4212	34.1232	21.5442	13.3475	6.08722	36.362	47.3198	28.1877	-32.1994	4.02186	-17.1534		10.7076	8.27273	-1.68971	0.0455559	1.03207	8.63911	8.39419	8.88446	11.0071	10.8208	11.1938		40.6586	109.423	124.757
1.55	1.80927	0.00725665	0.000817992	-39.1211	10.3981	28.7283	16.6888	11.2666	4.35315	30.0289	43.7329	26.3584	-30.1255	4.17269	-15.3301		10.5527	8.18182	-1.58003	0.0455559	1.03218	8.15612	7.91206	8.40061	10.5595	10.3745	10.7451		33.915	91.4401	103.647
1.6	1.84535	0.00579513	0.000823481	-49.3438	8.36824	23.3153	11.8171	9.17876	2.61325	23.6745	39.3231	24.1094	-29.7824	4.19764	-15.0285		10.3978	8.09091	-1.58382	0.0455559	1.03218	8.17276	7.92868	8.41728	10.5749	10.3898	10.7605		27.1488	73.3967	82.4657
1.65	1.88144	0.00810406	0.000830544	-34.1007	11.5751	31.8669	19.5135	12.4772	5.36198	33.7133	45.8986	27.4629	-29.341	4.22975	-14.6404		10.2429	8	-1.31831	0.0455559	1.03245	7.01044	6.76842	7.25289	9.50327	9.32109	9.68594		37.8383	101.902	115.928
1.7	1.91753	0.00734417	0.000818409	-38.5761	10.5197	29.0525	16.9806	11.3917	4.45735	30.4094	43.968	26.4783	-30.0994	4.17459	-15.3072		10.088	7.91667	-1.67027	0.0455559	1.03209	8.55339	8.30862	8.79858	10.9275	10.7415	11.1141		34.3202	92.5206	104.916
1.75	1.95361	0.00429333	0.000846214	-62.9781	6.2824	17.7531	6.81109	7.03333	0.82539	17.1449	33.4416	21.1099	-28.3617	4.30097	-13.7795		9.93308	7.83333	-1.66589	0.0455559	1.03209	8.53408	8.28935	8.77924	10.9096	10.7236	11.0961		20.196	54.8559	60.7004
1.8	1.9897	0.00621325	0.000866466	-46.1771	8.94896	24.8639	13.2108	9.77608	3.11102	25.4924	40.6891	24.8061	-27.0958	4.39303	-12.6667		9.77817	7.75	-1.53967	0.0455559	1.03222	7.97882	7.73508	8.223	10.3956	10.211	10.5807		29.0845	78.5587	88.5254
1.85	2.03844	0.00451952	0.000810655	-60.6444	6.59655	18.5908	7.56506	7.35645	1.09466	18.1283	34.4484	21.6233	-30.584	4.13934	-15.7332		9.62326	7.66667	-1.70542	0.0455559	1.03205	8.70842	8.46338	8.9539	11.0714	10.885	11.2583		21.2431	57.6484	63.9785
1.9	2.09223	0.00819951	0.000733253	-33.5685	11.7076	32.2204	19.8317	12.6136	5.4756	34.1283	46.1281	27.58	-35.4217	3.78751	-19.9861		9.46835	7.58333	-1.80147	0.0455559	1.03195	9.13305	8.88725	9.37929	11.4661	11.2786	11.654		38.2801	103.08	117.312
1.95	2.14603	0.00656201	0.000760264	-43.6947	9.43335	26.1556	14.3734	10.2743	3.52621	27.0087	41.76	25.3522	-33.7335	3.91029	-18.502		9.31344	7.5											30.6991	82.8643	93.5799
2	2.19982	0.0047696	0.000778042	-58.1963	6.94389	19.517	8.39867	7.71372	1.39238	19.2157	35.5044	22.1619	-32.6224	3.9911	-17.5251		9.15854	7.41667	-1.70131	0.0455559	1.03206	8.69029	8.44529	8.93574	11.0546	10.8682	11.2414		22.4009	60.7358	67.6029
2.05	2.25362	0.00740767	0.000771263	-38.1848	10.6079	29.2877	17.1922	11.4824	4.53294	30.6855	44.1368	26.5644	-33.046	3.96029	-17.8976		9.00363	7.33333	-1.40922	0.0455559	1.03236	7.40731	7.16458	7.65046	9.8683	9.68513	10.052		34.6142	93.3046	105.836
2.1	2.30741	0.00696762	0.000815338	-40.9685	9.9967	27.6579	15.7254	10.8537	4.00907	28.7723	42.936	25.952	-30.2914	4.16063	-15.4759		8.84872	7.25	-1.48454	0.0455559	1.03228	7.737	7.49368	7.98074	10.1722	9.98825	10.3567		32.577	87.8719	99.4583
2.15	2.3458	0.00654413	0.000805458	-43.8187	9.40852	26.0894	14.3138	10.2488	3.50492	26.931	41.7065	25.325	-30.9089	4.11572	-16.0188		8.69381	7.16667	-1.48212	0.0455559	1.03228	7.72641	7.48312	7.97013	10.1625	9.97851	10.3469		30.6164	82.6436	93.3208
2.2	2.36986	0.00725344	0.000732823	-39.1412	10.3937	28.7164	16.6781	11.2621	4.34933	30.0149	43.7242	26.354	-35.4485	3.78556	-20.0097		8.5389	7.08333	-1.59447	0.0455559	1.03217	8.21961	7.97544	8.46422	10.6183	10.4331	10.804		33.9002	91.4004	103.601
2.25	2.39392	0.00657878	0.00078066	-43.5787	9.45664	26.2177	14.4293	10.2983	3.54617	27.0817	41.81	25.3778	-32.4587	4.003	-17.3813		8.38399	7	-1.40923	0.0964569	1.03236	7.40738	6.9427	7.87364	9.86837	9.48113	10.2578		30.7768	83.0714	93.823
2.3	2.41797	0.00624632	0.000796876	-45.9359	8.99488	24.9864	13.3211	9.82331	3.15038	25.6362	40.7932	24.8592	-31.4453	4.07671	-16.4903		8.22908	6.83333	-1.59292	0.0964569	1.03217	8.21279	7.74537	8.68182	10.612	10.2205	11.0057		29.2376	78.9669	89.0046
2.35	2.44203	0.00665692	0.000820116	-43.042	9.56516	26.5071	14.6897	10.4099	3.63919	27.4214	42.0415	25.4958	-29.9928	4.18234	-15.2134		8.07417	6.66667	-1.65623	0.0964569	1.0321	8.49148	8.0231	8.96146	10.8701	10.4772	11.2653		31.1385	84.036	94.9553
2.4	2.46609	0.00633335	0.000795845	-45.3069	9.11576	25.3087	13.6112	9.94764	3.25399	26.0146	41.0645	24.9976	-31.5097	4.07202	-16.547		7.91926	6.5	-1.70404	0.0964569	1.03205	8.70237	8.23327	9.17307	11.0658	10.6717	11.4621		29.6405	80.0413	90.2659
2.45	2.49015	0.00598566	0.000825109	-47.8734	8.63286	24.021	12.4522	9.45094	2.84007	24.5029	39.9574	24.4329	-29.6807	4.20504	-14.9391		7.76435	6.33333	-1.98684	0.0964569	1.03176	9.95622	9.48282	10.4313	12.234	11.8333	12.6368		28.0308	75.7489	85.227
2.5	2.53176	0.006363	0.0008318	-45.0946	9.15695	25.4185	13.71	9.99	3.28929	26.1435	41.1561	25.0443	-29.2625	4.23546	-14.5714		7.60944	6.16667	-1.82571	0.0964569	1.03193	9.24039	8.76944	9.71294	11.566	11.1691	11.9651		29.7778	80.4074	90.6957
2.55	2.58556	0.00585039	0.000821912	-48.9124	8.44499	23.52	12.0013	9.2577	2.67904	23.9147	39.5092	24.2043	-29.8805	4.19051	-15.1148		7.45453	6	-1.59966	0.0964569	1.03216	8.24243	7.7749	8.71155	10.6394	10.2478	11.0333		27.4046	74.0789	83.2665
2.6	2.63935	0.00383233	0.000849637	-68.1413	5.64212	16.0457	5.27442	6.37475	0.276579	15.1405	31.2144	19.974	-28.1477	4.31653	-13.5914		7.29962	5.9	-1.68011	0.0964569	1.03208	8.59677	8.12803	9.06711	10.9678	10.5743	11.3635		18.0617	49.1645	54.0192
2.65	2.69315	0.00548123	0.00080195	-51.8751	7.93226	22.1527	10.7708	8.73033	2.23956	22.3097	38.2312	23.5526	-31.1281	4.09977	-16.2115		7.14471	5.8	-1.70035	0.0964569	1.03206	8.68605	8.21701	9.1567	11.0506	10.6566	11.4468		25.6955	69.5214	77.9164
2.7	2.74694	0.00504735	0.000811682	-55.6236	7.32965	20.5457	9.32449	8.1105	1.72303	20.4233	36.6142	22.7279	-30.5199	4.14401	-15.6768		6.9898	5.7	-1.61613	0.0964569	1.03214	8.31491	7.84713	8.78428	10.7065	10.3145	11.1008		23.6868	64.1648	71.6282
2.75	2.80074	0.00582978	0.000791525	-49.0728	8.41636	23.4436	11.9326	9.22825	2.6545	23.8251	39.44	24.1691	-31.7797	4.05239	-16.7843		6.8349	5.6	-1.59005	0.0964569	1.03217	8.20019	7.73281	8.66917	10.6003	10.2089	10.994		27.3092	73.8244	82.9678
2.8	2.84832	0.0057664	0.000804379	-49.5697	8.32833	23.2089	11.7213	9.13772	2.57905	23.5496	39.2257	24.0597	-30.9763	4.11081	-16.0781		6.67999	5.5	-1.60443	0.0964569	1.03216	8.26344	7.79585	8.73264	10.6589	10.2671	11.0529		27.0157	73.042	82.0493
2.85	2.88636	0.00716313	0.000826363	-39.7106	10.2682	28.382	16.3771	11.133	4.24182	29.6223	43.4786	26.2287	-29.6023	4.21074	-14.8702		6.52508	5.4	-1.41134	0.0964569	1.03236	7.41657	6.95186	7.88287	9.87683	9.48954	10.2664		33.4821	90.2856	102.292
2.9	2.9244	0.00243933	0.000843879	-88.6754	3.7074	10.8864	0.631095	4.38475	-1.38175	9.08404	22.3566	15.4565	-28.5076	4.29036	-13.9078		6.37017	5.3	-1.65502	0.0964569	1.0321	8.48615	8.01779	8.95611	10.8652	10.4723	11.2603		11.6126	31.967	33.8308
2.95	2.96244	0.00949575	0.000845475	-26.8971	13.508	37.0213	24.1525	14.4654	7.01875	39.7641	49.006	29.0477	-28.4078	4.29762	-13.82		6.21526	5.2	-1.70725	0.0964569	1.03205	8.71652	8.24737	9.18728	11.0789	10.6848	11.4753		44.2812	119.083	136.098
3	3.00048	0.00523823	0.000828959	-53.9362	7.59477	21.2527	9.96078	8.38319	1.95028	21.2532	37.3421	23.0991	-29.4401	4.22254	-14.7275		6.06035	5.1	-1.44515	0.0964569	1.03232	7.56447	7.09926	8.03128	10.0131	9.62505	10.4034		24.5705	66.5214	74.3947
3.05	3.03852	0.00573077	0.000866151	-49.8514	8.27885	23.0769	11.6026	9.08682	2.53663	23.3947	39.1042	23.9978	-27.1156	4.39159	-12.684		5.90544	5	-1.4672	0.0964569	1.0323	7.66103	7.19549	8.12816	10.1022	9.71357	10.493		26.8508	72.6021	81.5329
3.1	3.07655	0.00285105	0.000803972	-81.5861	4.27923	12.4113	2.00349	4.97292	-0.891611	10.8741	25.4147	17.0161	-31.0018	4.10896	-16.1004		5.75053	4.875	-1.64882	0.0964569	1.03211	8.45887	7.9906	8.92874	10.8399	10.4471	11.2349		13.5187	37.05	39.7978
3.15	3.11459	0.00564123	0.000893029	-50.5672	8.15448	22.7453	11.3041	8.9589	2.43003	23.0053	38.7954	23.8403	-25.4357	4.51377	-11.2072		5.59562	4.75	-1.91447	0.0964569	1.03184	9.63428	9.16199	10.1082	11.9332	11.5343	12.3344		26.4362	71.4966	80.2352
3.2	3.15263	0.00441314	0.000882703	-61.727	6.4488	18.1968	7.21046	7.20448	0.968023	17.6658	33.9813	21.3851	-26.081	4.46683	-11.7745		5.44071	4.625	-1.69362	0.0964569	1.03206	8.65637	8.18742	9.12692	11.0231	10.6292	11.4191		20.7506	56.3351	62.4368
3.25	3.17783	0.00747376	0.000743832	-37.7811	10.6997	29.5324	17.4125	11.5768	4.61162	30.9729	44.311	26.6532	-34.7605	3.8356	-19.4049		5.2858	4.5											34.9202	94.1205	106.794
3.3	3.19552	0.00672026	0.000812105	-42.6116	9.65314	26.7417	14.9009	10.5004	3.7146	27.6968	42.2272	25.5905	-30.4934	4.14593	-15.6535		5.13089	4.375	-1.83574	0.0964569	1.03192	9.28485	8.81376	9.75757	11.6074	11.2103	12.0067		31.4318	84.818	95.8733
3.35	3.2132	0.00500238	0.000835003	-56.0304	7.26719	20.3792	9.17459	8.04625	1.6695	20.2277	36.4387	22.6384	-29.0623	4.25001	-14.3955		4.91182	4.25	-1.79438	0.0964569	1.03196	9.10164	8.63117	9.57372	11.4368	11.0407	11.8352		23.4786	63.6096	70.9765
3.4	3.23089	0.00656387	0.000861473	-43.6819	9.43593	26.1625	14.3796	10.277	3.52841	27.0168	41.7655	25.3551	-27.4079	4.37033	-12.941		4.69274	4.125	-1.7812	0.0964569	1.03197	9.04335	8.57308	9.51523	11.3826	10.9868	11.7807		30.7077	82.8873	93.6068
3.45	3.24858	0.00293049	0.000866186	-80.3369	4.38957	12.7055	2.2683	5.08641	-0.797037	11.2195	25.9535	17.291	-27.1134	4.39175	-12.6821		4.53783	4	-1.44935	0.0964569	1.03232	7.58289	7.11762	8.04976	10.0301	9.64193	10.4205		13.8865	38.0307	40.9491
3.5	3.26627	0.00539669	0.000859346	-52.5816	7.81485	21.8396	10.489	8.60956	2.13892	21.9421	37.9264	23.3971	-27.5409	4.36066	-13.0579		4.38292	3.83333	-1.45152	0.0964569	1.03231	7.59237	7.12706	8.05926	10.0388	9.65061	10.4293		25.3041	68.4777	76.6912
3.55	3.28395	0.00352198	0.000776354	-71.9798	5.21109	14.8962	4.23995	5.93141	-0.0928757	13.7912	29.5585	19.1295	-32.7279	3.98343	-17.6179		4.16385	3.66667	-1.95933	0.0964569	1.03179	9.83373	9.36075	10.3083	12.1195	11.7195	12.5217		16.6249	45.3331	49.5215
3.6	3.30164	0.0027846	0.000845405	-82.658	4.18695	12.1652	1.78201	4.878	-0.970712	10.5852	24.9523	16.7803	-28.4122	4.29729	-13.8239		3.8445	3.5	-2.39125	0.0964569	1.03134	11.7694	11.2898	12.2507	13.9379	13.5279	14.3501		13.2111	36.2297	38.8348
3.65	3.31933	0.00341084	0.000859794	-73.4374	5.05672	14.4846	3.86945	5.77262	-0.225196	13.308	28.9298	18.8088	-27.5129	4.3627	-13.0333		3.68959	3.33333	-2.11824	0.0964569	1.03162	10.5427	10.0673	11.0198	12.7833	12.3796	13.1892		16.1103	43.9609	47.9107
3.7	3.34454	0.00640686	0.000874643	-44.7823	9.21786	25.581	13.8562	10.0527	3.3415	26.3342	41.2908	25.113	-26.5848	4.4302	-12.2174		3.21845	3.16667	-1.99613	0.0964569	1.03175	9.99762	9.52407	10.4728	12.2727	11.8718	12.6757		29.9808	80.9489	91.3313
3.75	3.39833	0.00333699	0.000895106	-74.4324	4.95415	14.2111	3.6233	5.66713	-0.313109	12.9869	28.5006	18.59	-25.3059	4.52321	-11.0931		2.99937	3	-1.87724	0.0964569	1.03187	9.46891	8.99719	9.94226	11.7789	11.3809	12.1792		15.7685	43.0492	46.8404
3.8	3.45213	0.00376795	0.000888128	-68.9114	5.55271	15.8072	5.05983	6.28278	0.199939	14.8606	30.8822	19.8046	-25.742	4.49149	-11.4765		2.7803	2.83333	-1.94243	0.0964569	1.03181	9.75857	9.28585	10.2329	12.0492	11.6497	12.4511		17.7637	48.3697	53.0862
3.85	3.50287	0.00456946	0.000824255	-60.1448	6.66592	18.7758	7.73154	7.4278	1.15412	18.3455	34.6639	21.7332	-29.7341	4.20116	-14.986		2.62539	2.66667		0.0964569	1.03381	1.38303	0.938648	1.8289					21.4744	58.265	64.7024
3.9	3.52897	0.00400723	0.00087175	-66.1127	5.88505	16.6935	5.85744	6.62462	0.484801	15.901	32.0895	20.4203	-26.7656	4.41705	-12.3764		2.47048	2.5	-2.64752	0.0964569	1.03108	12.9309	12.4472	13.4163	15.038	14.6221	15.4561		18.8714	51.3239	56.5541
3.95	3.55506	0.00286749	0.000891276	-81.3247	4.30207	12.4722	2.0583	4.99641	-0.872036	10.9456	25.5274	17.0736	-25.5453	4.5058	-11.3035		2.12409	2.33333	-2.44059	0.0964569	1.03129	11.9923	11.5119	12.4744	14.1485	13.7373	14.5618		13.5949	37.253	40.0361
4	3.58116	0.00332136	0.000908498	-74.6457	4.93245	14.1532	3.5712	5.6448	-0.331713	12.919	28.4086	18.543	-24.4689	4.58408	-10.3573		1.96918	2.16667	-2.05633	0.0964569	1.03169	10.2661	9.79165	10.7422	12.524	12.1218	12.9284		15.6961	42.8563	46.6139
4.05	3.60725	0.00193099	0.000899202	-99.2976	3.00138	9.00367	-1.06336	3.65856	-1.98691	6.87388	17.7744	13.1196	-25.0499	4.54183	-10.868		1.81427	2	-1.75466	0.0964569	1.032	8.92595	8.45609	9.39743	11.2734	10.8782	11.6709		9.25922	25.6913	26.4636
4.1	3.63334	0.00378931	0.000937973	-68.6544	5.58238	15.8863	5.13103	6.3133	0.22537	14.9535	30.993	19.8611	-22.6267	4.71806	-8.73774		1.46788	1.75	-1.88349	0.0964569	1.03187	9.49666	9.02484	9.9701	11.8048	11.4066	12.2053		17.8625	48.6335	53.3958
4.15	3.65944	0.00462771	0.000918532	-59.569	6.74682	18.9915	7.9257	7.51102	1.22347	18.5987	34.9122	21.8599	-23.8418	4.62969	-9.80595		1.31298	1.5	-2.34977	0.0964569	1.03139	11.5824	11.1034	12.063	13.7613	13.3523	14.1726		21.744	58.9841	65.5465
4.2	3.69417	0.0037264	0.000932614	-69.4153	5.495	15.6533	4.92134	6.22343	0.15048	14.68	30.6648	19.6937	-22.9617	4.6937	-9.03222		1.15807	1.25	-2.32214	0.0964569	1.03141	11.4579	10.9793	11.9381	13.6439	13.2356	14.0545		17.5713	47.8568	52.4841
4.25	3.73221	0.00484216	0.000957222	-57.51	7.04467	19.7858	8.64053	7.81737	1.47876	19.5311	35.8004	22.3129	-21.4236	4.80556	-7.6801		0.838712	1	-1.9365	0.0999518	1.03181	9.7322	9.24408	10.222	12.0246	11.6107	12.4409		22.7368	61.6316	68.6545
4.3	3.77025	0.00567396	0.000949954	-50.3043	8.19994	22.8665	11.4132	9.00566	2.469	23.1477	38.9088	23.8981	-21.8779	4.77252	-8.07944		0.683803	0.857143	-1.9625	0.0999518	1.03179	9.84786	9.35934	10.3381	12.1327	11.7182	12.5496		26.5878	71.9007	80.7096
4.35	3.80829	0.00673839	0.000901111	-42.4891	9.67832	26.8088	14.9613	10.5263	3.73618	27.7756	42.28	25.6175	-24.9306	4.5505	-10.7631		0.528894	0.714286	-2.2095	0.0999518	1.03153	10.9516	10.4591	11.4458	13.1673	12.7468	13.5901		31.5157	85.0418	96.1361
4.4	3.85171	0.00732374	0.000854133	-38.7027	10.4913	28.9768	16.9125	11.3625	4.43302	30.3206	43.9134	26.4505	-27.8667	4.33697	-13.3444		0.528894	0.571429	-2.175	0.0999518	1.03157	10.7969	10.305	11.2906	13.0219	12.6023	13.4439		34.2256	92.2684	104.619
4.45	3.9055	0.00525657	0.000844371	-53.7774	7.62023	21.3206	10.0219	8.40938	1.9721	21.3329	37.4106	23.134	-28.4768	4.2926	-13.8807		0.373984	0.428571	-2.096	0.0999518	1.03165	10.4433	9.95267	10.9357	12.69	12.2723	13.1101		24.6554	66.7477	74.6604
4.5	3.9593	0.006968	0.000834971	-40.9661	9.99722	27.6593	15.7267	10.8543	4.00952	28.7739	42.937	25.9525	-29.0643	4.24987	-14.3972		0.154909	0.285714	-2.6675	0.0999518	1.03106	13.0219	12.522	13.5235	15.1244	14.693	15.5582		32.5787	87.8765	99.4637
4.55	4.00982	0.0041957	0.000852404	-64.0237	6.1468	17.3915	6.48566	6.89386	0.709165	16.7204	32.9906	20.8799	-27.9747	4.32911	-13.4393		0	0.142857											19.744	53.6506	59.2855
4.6	4.05016	0.00361362	0.00086157	-70.8124	5.33836	15.2356	4.54539	6.06231	0.0162098	14.1896	30.0622	19.3864	-27.4019	4.37077	-12.9357														17.0491	46.4644	50.8495
4.65	4.09051	0.00265458	0.000834865	-84.8316	4.00636	11.6836	1.3486	4.69226	-1.1255	10.0199	24.0147	16.3021	-29.071	4.24938	-14.403														12.6092	34.6244	36.9504
4.7	4.12914	0.00519518	0.000824004	-54.3114	7.53497	21.0933	9.81726	8.32168	1.89902	21.066	37.1802	23.0166	-29.7498	4.20002	-14.9998														24.3712	65.9899	73.7707
4.75	4.15767	0.00268237	0.000873715	-84.3582	4.04496	11.7866	1.44123	4.73196	-1.09242	10.1407	24.2189	16.4063	-26.6428	4.42598	-12.2684														12.7378	34.9675	37.3532
4.8	4.1862	0.00346459	0.000853969	-72.7267	5.13137	14.6836	4.04862	5.84941	-0.161208	13.5417	29.2364	18.9652	-27.8769	4.33622	-13.3533														16.3592	44.6245	48.6896
4.85	4.21473	0.00546722	0.000860985	-51.9914	7.91281	22.1008	10.7241	8.71032	2.22288	22.2488	38.181	23.527	-27.4384	4.36811	-12.9679														25.6307	69.3484	77.7134
4.9	4.24326	0.00616345	0.000850027	-46.5429	8.8798	24.6795	13.0448	9.70493	3.05173	25.2759	40.5313	24.7256	-28.1233	4.31831	-13.5699														28.854	77.9439	87.8037
4.95	4.27179	0.00462901	0.000879909	-59.5562	6.74863	18.9964	7.93005	7.51288	1.22502	18.6044	34.9178	21.8627	-26.2557	4.45413	-11.9281														21.7501	59.0002	65.5654
5	4.30032	0.00544972	0.000923801	-52.1371	7.8885	22.036	10.6657	8.68531	2.20205	22.1727	38.1181	23.4949	-23.5125	4.65364	-9.51644														25.5496	69.1323	77.4597
5.05	4.32884	0.003529	0.000898947	-71.8894	5.22083	14.9222	4.26332	5.94142	-0.0845285	13.8217	29.5975	19.1494	-25.0658	4.54067	-10.882														16.6574	45.4197	49.6231
5.1	4.35737	0.00416839	0.000901101	-64.3205	6.10887	17.2903	6.39462	6.85484	0.676651	16.6017	32.8626	20.8146	-24.9312	4.55046	-10.7637														19.6175	53.3134	58.8897
5.15	4.39042	0.00706926	0.000893281	-40.3102	10.1379	28.0343	16.0642	10.9989	4.13007	29.2142	43.22	26.0968	-25.4199	4.51491	-11.1934														33.0475	89.1267	100.931
5.2	4.43076	0.00513383	0.000893113	-54.8514	7.44976	20.866	9.61275	8.23404	1.82598	20.7992	36.9473	22.8978	-25.4304	4.51415	-11.2026														24.0872	65.2324	72.8815
5.25	4.47111	0.00817747	0.00088291	-33.6908	11.677	32.1388	19.7582	12.5821	5.44937	34.0325	46.0754	27.5531	-26.0681	4.46777	-11.7632														38.1781	102.808	116.992
5.3	4.51146	0.00685293	0.000876777	-41.7229	9.83741	27.2331	15.3431	10.6899	3.87254	28.2736	42.6106	25.786	-26.4514	4.43989	-12.1002														32.046	86.456	97.7961
5.35	4.5518	0.00648381	0.000882448	-44.2397	9.32473	25.8659	14.1127	10.1626	3.4331	26.6687	41.5249	25.2323	-26.097	4.46567	-11.7886														30.3371	81.8988	92.4465
5.4	4.59215	0.00379017	0.000889901	-68.6441	5.58356	15.8895	5.13389	6.31452	0.226388	14.9572	30.9975	19.8634	-25.6312	4.49955	-11.3791														17.8665	48.644	53.4082
5.45	4.6325	0.00331669	0.000878832	-74.7098	4.92595	14.1359	3.55562	5.63812	-0.337279	12.8986	28.3809	18.5289	-26.323	4.44924	-11.9873														15.6745	42.7986	46.5462
5.5	4.67284	0.00313636	0.000885032	-77.2508	4.6755	13.468	2.95454	5.38052	-0.551949	12.1146	27.2848	17.9699	-25.9355	4.47742	-11.6466														14.8396	40.5724	43.9328
5.55	4.71319	0.00459819	0.000866348	-59.8599	6.70582	18.8822	7.8273	7.46884	1.18832	18.4704	34.7867	21.7959	-27.1033	4.39249	-12.6732														21.6074	58.6196	65.1187
5.6	4.75353	0.0038733	0.000880247	-67.6579	5.69903	16.1974	5.411	6.43329	0.325357	15.3187	31.4229	20.0803	-26.2346	4.45567	-11.9095														18.2514	49.6704	54.613
5.65	4.79388	0.00582224	0.000889758	-49.1317	8.40588	23.4157	11.9075	9.21748	2.64552	23.7923	39.4146	24.1561	-25.6402	4.4989	-11.387														27.2742	73.7313	82.8585
5.7	4.83423	0.00517262	0.000903913	-54.5092	7.50363	21.0097	9.74206	8.28945	1.87216	20.9679	37.0949	22.9731	-24.7554	4.56324	-10.6092														24.2667	65.7113	73.4437
5.75	4.87457	0.00378831	0.00088204	-68.6664	5.58098	15.8826	5.12769	6.31187	0.224175	14.9492	30.9879	19.8585	-26.1225	4.46382	-11.811														17.8579	48.6211	53.3813
5.8	4.91492	0.00662875	0.000894929	-43.2348	9.52604	26.4028	14.5958	10.3696	3.60565	27.2989	41.9584	25.4534	-25.317	4.5224	-11.1028														31.0081	83.6883	94.5471
5.85	4.95526	0.00713059	0.000971454	-39.9176	10.223	28.2614	16.2686	11.0866	4.20308	29.4808	43.3893	26.1832	-20.5341	4.87025	-6.89811														33.3314	89.8838	101.82
5.9	4.99561	0.00570574	0.00098229	-50.0504	8.24408	22.9842	11.5191	9.05106	2.50683	23.2858	39.0183	23.954	-19.8569	4.9195	-6.30276														26.7349	72.2931	81.1701
5.95	5.02877	0.00572759	0.000947064	-49.8766	8.27444	23.0652	11.592	9.08228	2.53285	23.3808	39.0933	23.9922	-22.0585	4.75938	-8.23824														26.8361	72.5629	81.4869
6	5.06104	0.00499531	0.000952876	-56.0946	7.25738	20.353	9.15104	8.03616	1.66109	20.197	36.411	22.6243	-21.6952	4.7858	-7.91888														23.4459	63.5224	70.8741
6.05	5.09332	0.00380261	0.000947573	-68.4952	5.60085	15.9356	5.17537	6.3323	0.241202	15.0113	31.0617	19.8961	-22.0267	4.7617	-8.21028														17.9241	48.7977	53.5886
6.1	5.1256	0.00354071	0.000862648	-71.7388	5.2371	14.9656	4.30238	5.95816	-0.070578	13.8727	29.6625	19.1825	-27.3345	4.37567	-12.8765														16.7116	45.5644	49.793
6.15	5.15787	0.00599427	0.000813461	-47.8081	8.64482	24.0528	12.4809	9.46324	2.85032	24.5403	39.9856	24.4473	-30.4087	4.15209	-15.5791														28.0707	75.8552	85.3517
6.2	5.19015	0.00676826	0.000812601	-42.2881	9.7198	26.9195	15.0609	10.5689	3.77173	27.9055	42.3668	25.6617	-30.4624	4.14819	-15.6263														31.654	85.4106	96.5689
6.25	5.22243	0.00612371	0.00081679	-46.837	8.82459	24.5322	12.9124	9.64815	3.00441	25.1031	40.4045	24.6609	-30.2006	4.16723	-15.3962														28.6699	77.4532	87.2276
6.3	5.2547	0.00376057	0.000801494	-69.0005	5.54246	15.7799	5.03523	6.27224	0.191155	14.8286	30.8438	19.785	-31.1566	4.0977	-16.2366														17.7295	48.2786	52.9793
6.35	5.28698	0.00601129	0.000776061	-47.6792	8.66846	24.1159	12.5376	9.48756	2.87059	24.6143	40.0412	24.4757	-32.7462	3.9821	-17.634														28.1495	76.0653	85.5984
6.4	5.31926	0.00589226	0.000749345	-48.5882	8.50314	23.675	12.1409	9.31752	2.72888	24.0968	39.649	24.2757	-34.4159	3.86066	-19.1019														27.5984	74.5958	83.8734
6.45	5.35154	0.00760959	0.000732029	-36.9624	10.8883	30.0355	17.8653	11.7708	4.77332	31.5634	44.6641	26.8334	-35.4982	3.78195	-20.0534														35.549	95.7974	108.762
6.5	5.38381	0.00603406	0.000740606	-47.5073	8.70009	24.2002	12.6135	9.52009	2.89769	24.7133	40.1153	24.5135	-34.9621	3.82094	-19.5821														28.2549	76.3464	85.9284
6.55	5.41609	0.00760423	0.000741291	-36.9944	10.8809	30.0157	17.8474	11.7632	4.76694	31.5401	44.6503	26.8263	-34.9193	3.82405	-19.5445														35.5242	95.7312	108.684
6.6	5.44837	0.00641252	0.000722334	-44.7422	9.22573	25.6019	13.8751	10.0607	3.34824	26.3588	41.3081	25.1218	-36.1041	3.73788	-20.5861														30.0071	81.0188	91.4134
6.65	5.48064	0.00714041	0.000853803	-39.855	10.2367	28.2978	16.3014	11.1006	4.21477	29.5235	43.4163	26.197	-27.8873	4.33547	-13.3625														33.3769	90.005	101.962
6.7	5.51292	0.00238507	0.000875145	-89.6978	3.63205	10.6855	0.450248	4.30725	-1.44634	8.84815	21.9155	15.2316	-26.5535	4.43248	-12.1899														11.3615	31.2972	33.0446
6.75	5.5452	0.00268848	0.000812511	-84.2548	4.05345	11.8092	1.4616	4.74069	-1.08514	10.1673	24.2635	16.429	-30.468	4.14778	-15.6313														12.7661	35.043	37.4418
6.8	5.57747	0.00614346	0.00082425	-46.6906	8.85203	24.6054	12.9782	9.67637	3.02793	25.189	40.4676	24.6931	-29.7344	4.20114	-14.9863														28.7614	77.697	87.5139
6.85	5.60975	0.0059971	0.000821511	-47.7866	8.64875	24.0633	12.4903	9.46728	2.85369	24.5526	39.9948	24.452	-29.9056	4.18869	-15.1368														28.0838	75.8901	85.3927
6.9	5.64203	0.00638059	0.000855331	-44.9691	9.18138	25.4837	13.7686	10.0151	3.31023	26.22	41.2102	25.0719	-27.7918	4.34241	-13.2785														29.8592	80.6246	90.9506
6.95	5.6743	0.00305509	0.000857139	-78.4442	4.56262	13.167	2.68362	5.26441	-0.648706	11.7612	26.77	17.7073	-27.6788	4.35063	-13.1792														14.4634	39.569	42.7549
7	5.70658	0.00546062	0.000827588	-52.0463	7.90364	22.0764	10.7021	8.70088	2.21502	22.2201	38.1573	23.5149	-29.5257	4.21631	-14.8028														25.6001	69.2669	77.6176
7.05	5.73886	0.00470185	0.000818569	-58.8466	6.84979	19.2661	8.17282	7.61692	1.31172	18.9211	35.2239	22.0188	-30.0895	4.17531	-15.2984														22.0873	59.8993	66.621
7.1	5.77114	0.00508678	0.000839765	-55.2698	7.38442	20.6918	9.45593	8.16683	1.76998	20.5947	36.7668	22.8057	-28.7647	4.27166	-14.1338														23.8694	64.6516	72.1997
7.15	5.80341	0.00301265	0.000861497	-79.08	4.50368	13.0098	2.54217	5.20379	-0.699224	11.5767	26.4957	17.5675	-27.4064	4.37044	-12.9397														14.2669	39.0451	42.1399
7.2	5.83569	0.00332456	0.000904959	-74.602	4.93688	14.165	3.58185	5.64937	-0.32791	12.9329	28.4274	18.5526	-24.69	4.568	-10.5517														15.7109	42.8958	46.6602
7.25	5.86797	0.00712689	0.000842203	-39.9412	10.2179	28.2477	16.2563	11.0813	4.19867	29.4647	43.3791	26.178	-28.6123	4.28274	-13.9998														33.3143	89.8381	101.766
7.3	5.90024	0.00537742	0.000828292	-52.7442	7.78808	21.7682	10.4247	8.58203	2.11598	21.8583	37.8563	23.3614	-29.4818	4.21951	-14.7642														25.2149	68.2398	76.4119
7.35	5.93252	0.00485562	0.000868181	-57.3839	7.06336	19.8356	8.68539	7.8366	1.49478	19.5896	35.8549	22.3406	-26.9887	4.40082	-12.5725														22.7992	61.7977	68.8495
7.4	5.9648	0.00285834	0.000899811	-81.47	4.28936	12.4383	2.02781	4.98335	-0.882927	10.9058	25.4648	17.0417	-25.0118	4.5446	-10.8345														13.5525	37.14	39.9035
7.45	5.99707	0.00579935	0.000929551	-49.3107	8.3741	23.3309	11.8312	9.18479	2.61828	23.6928	39.3374	24.1167	-23.1531	4.67978	-9.2005														27.1683	73.4488	82.5268
7.5	6.04892	0.00719033	0.000938006	-39.5383	10.306	28.4827	16.4678	11.1719	4.27421	29.7406	43.5529	26.2666	-22.6246	4.71821	-8.73591														33.608	90.6214	102.686
7.55	6.10271	0.00221795	0.000931566	-92.9999	3.39993	10.0665	-0.106835	4.0685	-1.6453	8.12152	20.4911	14.5051	-23.0271	4.68894	-9.08978														10.5877	29.2339	30.6225
7.6	6.15651	0.00458619	0.000923049	-59.9787	6.68915	18.8377	7.78729	7.4517	1.17403	18.4182	34.7355	21.7698	-23.5594	4.65022	-9.55773														21.5518	58.4715	64.9447
7.65	6.2103	0.00359579	0.000892501	-71.0371	5.3136	15.1696	4.48598	6.03685	-0.00500817	14.1121	29.9652	19.3369	-25.4687	4.51137	-11.2362														16.9666	46.2444	50.5912
7.7	6.2641	0.00597851	0.000884942	-47.9277	8.62294	23.9945	12.4284	9.44074	2.83157	24.4718	39.934	24.421	-25.9412	4.47701	-11.6516														27.9978	75.6607	85.1234
7.75	6.31789	0.00638111	0.000907823	-44.9654	9.1821	25.4856	13.7704	10.0159	3.31085	26.2222	41.2118	25.0727	-24.511	4.58102	-10.3943														29.8616	80.631	90.9581
7.8	6.37169	0.00471516	0.000846724	-58.7181	6.86828	19.3154	8.21721	7.63595	1.32758	18.979	35.2793	22.0471	-28.3297	4.30329	-13.7514														22.1489	60.0638	66.814
7.85	6.42548	0.00667237	0.000803347	-42.9366	9.58662	26.5643	14.7412	10.432	3.65758	27.4886	42.087	25.519	-31.0408	4.10612	-16.1348														31.21	84.2268	95.1793
7.9	6.47928	0.00699119	0.000789131	-40.815	10.0294	27.7452	15.804	10.8874	4.03713	28.8747	43.0022	25.9858	-31.9293	4.0415	-16.9159														32.6861	88.1629	99.7999
7.95	6.53307	0.00834102	0.000803819	-32.7907	11.9042	32.7445	20.3034	12.8157	5.64407	34.7436	46.4637	27.7511	-31.0113	4.10827	-16.1088														38.9353	104.827	119.363
8	6.58687	0.00877079	0.000821241	-30.507	12.5011	34.3363	21.736	13.4297	6.15571	36.6121	47.4488	28.2535	-29.9225	4.18746	-15.1516														40.925	110.133	125.591
8.05	6.64066	0.00831465	0.000811193	-32.9346	11.8676	32.6469	20.2155	12.7781	5.61268	34.6289	46.4016	27.7195	-30.5504	4.14179	-15.7037														38.8132	104.502	118.98
8.1	6.69446	0.00750942	0.000842577	-37.5647	10.7492	29.6645	17.5314	11.6277	4.65407	31.1279	44.4043	26.7008	-28.5889	4.28444	-13.9793														35.0853	94.5607	107.31
8.15	6.74825	0.00376923	0.000867951	-68.8959	5.55449	15.812	5.06411	6.28462	0.201468	14.8662	30.8889	19.808	-27.003	4.39978	-12.5851														17.7696	48.3856	53.1048
8.2	6.80205	0.00666153	0.000871212	-43.0106	9.57156	26.5242	14.7051	10.4165	3.64467	27.4414	42.0551	25.5028	-26.7993	4.4146	-12.406														31.1598	84.0929	95.0221
8.25	6.85584	0.00695036	0.000895223	-41.0812	9.97273	27.5939	15.6679	10.8291	3.98853	28.6972	42.8874	25.9272	-25.2986	4.52374	-11.0867														32.4971	87.6588	99.2082
8.3	6.90964	0.00503948	0.000901796	-55.6945	7.31872	20.5166	9.29826	8.09925	1.71366	20.389	36.5836	22.7123	-24.8877	4.55362	-10.7255														23.6504	64.0676	71.5142
8.35	6.96343	0.000737559	0.000918424	-143.045	1.34383	4.58355	-5.04147	1.95366	-3.40767	1.68504	-1.09701	3.49518	-23.8485	4.6292	-9.81186														3.73407	10.9575	9.16753
8.4	7.00861	0.00241647	0.000945945	-89.1033	3.67565	10.8017	0.554905	4.3521	-1.40896	8.98466	22.172	15.3623	-22.1284	4.7543	-8.29972														11.5068	31.6848	33.4996
8.45	7.03551	0.00608412	0.000964118	-47.1318	8.76961	24.3856	12.7804	9.5916	2.95728	24.9309	40.2773	24.5961	-20.9926	4.8369	-7.30121														28.4867	76.9644	86.6539
8.5	7.06241	0.0032299	0.000972753	-75.915	4.80542	13.8145	3.26634	5.51415	-0.440592	12.5213	27.861	18.2638	-20.453	4.87615	-6.82677														15.2727	41.7272	45.2884
8.55	7.08931	0.00603113	0.000921566	-47.5294	8.69601	24.1894	12.6038	9.5159	2.8942	24.7006	40.1058	24.5086	-23.6521	4.64348	-9.63925														28.2413	76.3102	85.8859
8.6	7.1162	0.00796441	0.000941351	-34.8908	11.3811	31.3497	19.048	12.2777	5.19572	33.1061	45.5577	27.2891	-22.4155	4.73342	-8.55212														37.1917	100.178	113.904
8.65	7.1431	0.00456236	0.00098559	-60.2156	6.65605	18.7495	7.70785	7.41765	1.14566	18.3146	34.6333	21.7177	-19.6506	4.9345	-6.12141														21.4415	58.1772	64.5993
8.7	7.17	0.00325994	0.00098447	-75.4941	4.84715	13.9257	3.36648	5.55706	-0.404828	12.6519	28.0426	18.3564	-19.7206	4.92941	-6.18294														15.4118	42.0981	45.7238
8.75	7.1969		0.000999372										-18.7892	4.99715	-5.36416
8.8	7.22379	0.00241679	0.0010143	-89.0973	3.6761	10.8029	0.555967	4.35256	-1.40858	8.98604	22.1745	15.3637	-17.8563	5.065	-4.54399														11.5083	31.6888	33.5042
8.85	7.25069	0.00371961	0.00100684	-69.4982	5.48557	15.6282	4.89871	6.21373	0.142396	14.6505	30.629	19.6755	-18.3224	5.0311	-4.95379														17.5399	47.773	52.3857
8.9	7.27759	0.0038009	0.0010105	-68.5156	5.59848	15.9293	5.16967	6.32986	0.23917	15.0039	31.0529	19.8916	-18.0939	5.04771	-4.75291														17.9162	48.7766	53.5638
8.95	7.30449	0.00343271	0.00103674	-73.1469	5.08709	14.5656	3.94235	5.80386	-0.199161	13.4031	29.0551	18.8728	-16.454	5.16698	-3.31123														16.2116	44.2309	48.2276
9	7.33138	0.00224388	0.00105901	-92.4716	3.43594	10.1625	-0.0204011	4.10554	-1.61443	8.23426	20.719	14.6213	-15.0621	5.26821	-2.08756														10.7078	29.5541	30.9983
9.05	7.35828	0.00265215	0.00102561	-84.8732	4.00299	11.6746	1.3405	4.68879	-1.12839	10.0093	23.9967	16.293	-17.1496	5.11639	-3.92277														12.5979	34.5944	36.9152
9.1	7.38518	0.00346372	0.0010124	-72.7381	5.13016	14.6804	4.04573	5.84817	-0.16224	13.5379	29.2315	18.9627	-17.9752	5.05635	-4.6485														16.3552	44.6138	48.6771
9.15	7.41207	0.00126015	0.00101772	-118.698	2.06965	6.51908	-3.2995	2.70021	-2.78554	3.95718	9.40573	8.85157	-17.6425	5.08055	-4.35602														6.15347	17.4093	16.7413
9.2	7.43897	0.00473655	0.00103169	-58.5124	6.89798	19.3946	8.2885	7.6665	1.35303	19.072	35.368	22.0924	-16.7694	5.14404	-3.5885														22.2479	60.3278	67.1239
9.25	7.46587	0.00251004	0.00101956	-87.3764	3.80561	11.1483	0.866805	4.48577	-1.29757	9.39149	22.9169	15.7423	-17.5276	5.08891	-4.25499														11.94	32.84	34.8557
9.3	7.49277	0.00130862	0.00100777	-116.982	2.13698	6.69861	-3.13792	2.76946	-2.72783	4.16793	10.1458	9.22902	-18.2645	5.03531	-4.90288														6.37789	18.0077	17.4438
9.35	7.51966	0.00222949	0.00102185	-92.7641	3.41596	10.1092	-0.0683742	4.08498	-1.63156	8.17169	20.5928	14.557	-17.3847	5.0993	-4.12938														10.6411	29.3764	30.7897
9.4	7.54656	0.00372473	0.00102694	-69.4357	5.49268	15.6472	4.91577	6.22105	0.14849	14.6727	30.656	19.6892	-17.0661	5.12247	-3.8493														17.5636	47.8362	52.4599
9.45	7.57346	0.00261004	0.00102633	-85.6007	3.9445	11.5187	1.20014	4.62863	-1.17852	9.82627	23.6829	16.1329	-17.1044	5.11968	-3.88302														12.403	34.0746	36.305
9.5	7.60036	0.00308355	0.00103078	-78.0227	4.60215	13.2724	2.7785	5.30507	-0.61482	11.885	26.9518	17.8001	-16.8264	5.1399	-3.63862														14.5951	39.9204	43.1674
9.55	7.62725	0.0012878	0.00105148	-117.711	2.10805	6.62148	-3.20734	2.73971	-2.75262	4.07739	9.8313	9.06861	-15.5325	5.234	-2.50113														6.28148	17.7506	17.142
9.6	7.65415		0.00104122										-16.1737	5.18737	-3.06477
9.65	7.68105	0.00210413	0.00100089	-95.3946	3.24184	9.64491	-0.486246	3.90589	-1.7808	7.62664	19.4581	13.9783	-18.6946	5.00403	-5.28097														10.0608	27.8287	28.9728
9.7	7.70795	0.00435909	0.00103165	-62.2872	6.37374	17.9966	7.0303	7.12727	0.903678	17.4308	33.7397	21.2619	-16.772	5.14385	-3.59079														20.5004	55.6678	61.6535
9.75	7.73484	0.00431115	0.00105813	-62.7898	6.30715	17.8191	6.8705	7.05879	0.846609	17.2224	33.5229	21.1513	-15.1166	5.26425	-2.13545														20.2785	55.0759	60.9587
9.8	7.76174	0.0041777	0.00107005	-64.2191	6.12181	17.3248	6.42568	6.86815	0.687742	16.6422	32.9063	20.8369	-14.3717	5.31842	-1.48066														19.6607	53.4284	59.0247
9.85	7.78864	0.00349286	0.00105252	-72.3573	5.17064	14.7884	4.14287	5.8898	-0.127546	13.6646	29.3957	19.0465	-15.4677	5.23871	-2.44414														16.4901	44.9736	49.0994
9.9	7.81554	0.00555531	0.00102421	-51.2648	8.03516	22.4271	11.0177	8.83616	2.32775	22.6318	38.4944	23.6868	-17.237	5.11004	-3.99955														26.0385	70.4359	78.99
9.95	7.84243	0.00329181	0.000964728	-75.0519	4.89141	14.0437	3.47271	5.60259	-0.36689	12.7905	28.2333	18.4536	-20.9545	4.83967	-7.26769														15.5593	42.4915	46.1857
10	7.86933	0.00298901	0.000929687	-79.4382	4.47084	12.9222	2.46335	5.17001	-0.727375	11.4739	26.3412	17.4887	-23.1446	4.68039	-9.19304														14.1574	38.7532	41.7972
10.05	7.89623	0.00293029	0.000904968	-80.34	4.38929	12.7048	2.26764	5.08613	-0.797271	11.2187	25.9522	17.2903	-24.6895	4.56804	-10.5512														13.8856	38.0283	40.9463
10.1	7.92313	0.00176069	0.000902259	-103.494	2.76485	8.37293	-1.63103	3.41527	-2.18966	6.13343	15.9641	12.1963	-24.8588	4.55572	-10.7001														8.47079	23.5888	23.9955
10.15	7.95002	0.00135947	0.000897321	-115.249	2.2076	6.88694	-2.96842	2.84211	-2.66729	4.38902	10.8933	9.61024	-25.1674	4.53328	-10.9714														6.61331	18.6355	18.1808
10.2	7.97692	0.00314281	0.000890638	-77.1574	4.68446	13.4919	2.97603	5.38973	-0.544274	12.1427	27.3251	17.9904	-25.5851	4.5029	-11.3386														14.8695	40.652	44.0262
10.25	8.00417	0.00288569	0.000869659	-81.0371	4.32735	12.5396	2.11898	5.02242	-0.850364	11.0248	25.6515	17.1369	-26.8963	4.40754	-12.4912														13.6791	37.4777	40.2999
10.3	8.03351	0.00170219	0.000863343	-105.03	2.6836	8.15626	-1.82603	3.3317	-2.2593	5.87909	15.3015	11.8584	-27.2911	4.37883	-12.8383														8.19995	22.8665	23.1477
10.35	8.06285	0.00300158	0.000877998	-79.2474	4.48831	12.9688	2.50527	5.18797	-0.712404	11.5286	26.4235	17.5307	-26.3752	4.44544	-12.0331														14.2157	38.9084	41.9794
10.4	8.09219	0.00611026	0.000887505	-46.9369	8.80591	24.4824	12.8675	9.62894	2.9884	25.0446	40.3614	24.639	-25.781	4.48866	-11.5107														28.6077	77.2871	87.0327
10.45	8.12154	0.00265403	0.000878796	-84.8411	4.00559	11.6816	1.34675	4.69146	-1.12616	10.0175	24.0106	16.3	-26.3252	4.44907	-11.9892														12.6066	34.6176	36.9424
10.5	8.15088	0.00293052	0.00086407	-80.3365	4.38961	12.7056	2.26839	5.08645	-0.797004	11.2196	25.9537	17.2911	-27.2456	4.38214	-12.7984														13.8866	38.0311	40.9495
10.55	8.18022	0.00403096	0.000876326	-65.8444	5.918	16.7813	5.93654	6.65852	0.513048	16.0042	32.2052	20.4793	-26.4796	4.43784	-12.125														18.9813	51.6168	56.898
10.6	8.20956	0.0031407	0.000877837	-77.188	4.68153	13.4841	2.96899	5.38671	-0.546788	12.1335	27.3119	17.9837	-26.3852	4.44471	-12.0419														14.8597	40.6259	43.9956
10.65	8.23891	0.00705484	0.000879615	-40.4031	10.1178	27.9809	16.0161	10.9783	4.11291	29.1515	43.1799	26.0764	-26.2741	4.45279	-11.9442														32.9807	88.9486	100.722
10.7	8.26825	0.00395115	0.000876681	-66.7534	5.80715	16.4857	5.6705	6.5445	0.418034	15.6572	31.8131	20.2793	-26.4575	4.43946	-12.1055														18.6118	50.6315	55.7413
10.75	8.29759	0.00165923	0.00090757	-106.192	2.62394	7.99716	-1.96922	3.27033	-2.31044	5.69232	14.8003	11.6028	-24.5269	4.57987	-10.4082														8.00108	22.3362	22.5251
10.8	8.32694	0.00503358	0.000918474	-55.7477	7.31052	20.4947	9.27859	8.09082	1.70664	20.3634	36.5606	22.7006	-23.8454	4.62943	-9.80914														23.623	63.9948	71.4287
10.85	8.35628	0.00266356	0.000929339	-84.678	4.01884	11.7169	1.37854	4.70509	-1.11481	10.059	24.0809	16.3359	-23.1663	4.67881	-9.21214														12.6507	34.7353	37.0806
10.9	8.38562	0.00357072	0.00093922	-71.3551	5.27878	15.0768	4.40241	6.00103	-0.0348526	14.0031	29.828	19.2669	-22.5488	4.72373	-8.66925														16.8506	45.9349	50.2279
10.95	8.41496	0.00392546	0.000924644	-67.0499	5.77147	16.3906	5.58487	6.5078	0.387453	15.5455	31.6852	20.2141	-23.4598	4.65747	-9.47012														18.4929	50.3143	55.369
11	8.44431	0.000693844	0.000933397	-145.822	1.28312	4.42164	-5.18719	1.89121	-3.45971	1.49497	-2.29505	2.88418	-22.9127	4.69726	-8.9892														3.53168	10.4178	8.53396
11.05	8.47365	0.00366837	0.00096099	-70.1288	5.41441	15.4384	4.72791	6.14053	0.0813956	14.4277	30.357	19.5367	-21.1881	4.82268	-7.47305														17.3026	47.1404	51.6431
11.1	8.50299	0.00599861	0.000934037	-47.7752	8.65084	24.0689	12.4954	9.46944	2.85548	24.5592	39.9998	24.4545	-22.8727	4.70017	-8.95399														28.0908	75.9087	85.4146
11.15	8.53233	0.00156387	0.000926412	-108.883	2.49149	7.64397	-2.28709	3.1341	-2.42396	5.27771	13.6397	11.0109	-23.3493	4.66551	-9.37298														7.5596	21.1589	21.1431
11.2	8.56168	0.00241289	0.00092796	-89.1708	3.67068	10.7885	0.542957	4.34698	-1.41323	8.96907	22.1429	15.3475	-23.2525	4.67255	-9.28789														11.4902	31.6406	33.4476
11.25	8.59102	0.00348647	0.000945821	-72.4405	5.16176	14.7647	4.12156	5.88067	-0.135155	13.6368	29.3598	19.0282	-22.1362	4.75373	-8.30655														16.4605	44.8947	49.0068
11.3	8.62036	0.003457	0.000976167	-72.8263	5.12084	14.6556	4.02334	5.83857	-0.170235	13.5087	29.1934	18.9433	-20.2396	4.89167	-6.6392														16.3241	44.5309	48.5797
11.35	8.6497	0.0035793	0.00100141	-71.2461	5.2907	15.1085	4.43101	6.01329	-0.0246399	14.0404	29.8751	19.2909	-18.6619	5.00641	-5.25222														16.8903	46.0408	50.3522
11.4	8.67905	0.000551211	0.000983805	-156.283	1.08502	3.89337	-5.66263	1.68744	-3.62951	0.874831	-6.80737	0.582892	-19.7622	4.92639	-6.21951														2.87135	8.65693	6.46683
11.45	8.70839	0.00243062	0.000964076	-88.838	3.6953	10.8541	0.602061	4.37231	-1.39212	9.04617	22.2864	15.4207	-20.9953	4.83671	-7.30353														11.5723	31.8595	33.7046
11.5	8.73773	0.00274818	0.000965243	-83.2565	4.13636	12.0303	1.66059	4.82597	-1.01407	10.4269	24.6941	16.6486	-20.9223	4.84201	-7.23942														13.0425	35.78	38.3069
11.55	8.76708	0.0038817	0.000991407	-67.5594	5.71069	16.2285	5.439	6.44529	0.335357	15.3552	31.4654	20.102	-19.2871	4.96094	-5.80182														18.2903	49.7741	54.7348
11.6	8.79642	0.00163945	0.00100815	-106.737	2.59646	7.9239	-2.03516	3.24208	-2.33399	5.60632	14.5652	11.4829	-18.2404	5.03706	-4.88169														7.9095	22.092	22.2384
11.65	8.82576	0.00354558	0.00104449	-71.6763	5.24387	14.9836	4.31862	5.96512	-0.06478	13.8938	29.6895	19.1963	-15.9694	5.20223	-2.88519														16.7342	45.6245	49.8635
11.7	8.8551	0.00479372	0.00103188	-57.967	6.97738	19.6064	8.47906	7.74817	1.42109	19.3205	35.6033	22.2123	-16.7576	5.1449	-3.57813														22.5126	61.0335	67.9524
11.75	8.88445	0.00435425	0.00102581	-62.3377	6.36701	17.9787	7.01417	7.12036	0.897917	17.4098	33.7179	21.2508	-17.1371	5.1173	-3.91177														20.478	55.608	61.5833
11.8	8.91379	0.00319268	0.00101867	-76.4418	4.75372	13.6766	3.14226	5.46097	-0.484906	12.3595	27.6338	18.1479	-17.5829	5.08488	-4.30362														15.1004	41.2676	44.749
11.85	8.94313	0.00424368	0.00100324	-63.5068	6.21345	17.5692	6.64561	6.96241	0.766291	16.9291	33.2136	20.9936	-18.5474	5.01474	-5.15153														19.9661	54.243	59.9809
11.9	8.97247	0.00268703	0.00103416	-84.2794	4.05143	11.8038	1.45675	4.73861	-1.08687	10.161	24.2529	16.4236	-16.6147	5.15529	-3.4525														12.7594	35.025	37.4207
11.95	9.00333	0.00396706	0.00109046	-66.5707	5.82925	16.5447	5.72354	6.56723	0.436977	15.7264	31.8919	20.3195	-13.096	5.4112	-0.359127														18.6855	50.8279	55.9719
12	9.05713	0.0024602	0.00108449	-88.2881	3.73639	10.9637	0.700677	4.41458	-1.3569	9.1748	22.5236	15.5417	-13.4697	5.38402	-0.687623														11.7093	32.2247	34.1334
12.05	9.11092	0.00105082	0.0010851	-126.955	1.77892	5.74378	-3.99726	2.40117	-3.03474	3.04705	5.84379	7.03498	-13.4315	5.3868	-0.654092														5.18436	14.825	13.7076
12.1	9.16472	0.00301126	0.00112609	-79.1011	4.50175	13.0047	2.53753	5.2018	-0.700884	11.5707	26.4867	17.5628	-10.8697	5.57311	1.59808														14.2605	39.0279	42.1197
12.15	9.21851	0.00640733	0.0011316	-44.779	9.21852	25.5827	13.8578	10.0533	3.34206	26.3362	41.2922	25.1137	-10.525	5.59818	1.90108														29.983	80.9547	91.3381
12.2	9.27231	0.00477542	0.00113069	-58.1408	6.95198	19.5386	8.41808	7.72203	1.39931	19.241	35.5283	22.1741	-10.5819	5.59405	1.85111														22.4279	60.8077	67.6873
12.25	9.3261	0.00221433	0.00111307	-93.0741	3.39491	10.0531	-0.118891	4.06333	-1.6496	8.10579	20.4591	14.4888	-11.6832	5.51395	0.882927														10.571	29.1893	30.57
12.3	9.3799	0.00370761	0.00111278	-69.6452	5.4689	15.5837	4.8587	6.19659	0.128107	14.5983	30.5657	19.6431	-11.7009	5.51266	0.867307														17.4843	47.6248	52.2117
12.35	9.43369	0.00322608	0.00112421	-75.9688	4.80011	13.8003	3.2536	5.50869	-0.445142	12.5047	27.8378	18.2519	-10.9872	5.56457	1.49479														15.255	41.68	45.2331
12.4	9.48749	0.00161053	0.00111154	-107.546	2.55629	7.81678	-2.13156	3.20076	-2.36841	5.48057	14.2162	11.3049	-11.779	5.50698	0.798701														7.77561	21.735	21.8193
12.45	9.54128	0.00384333	0.00110053	-68.011	5.65741	16.0864	5.31111	6.39047	0.289681	15.1884	31.2706	20.0027	-12.4667	5.45697	0.194143														18.1126	49.3004	54.1787
12.5	9.59508	0.00500626	0.00108481	-55.9951	7.27258	20.3936	9.18753	8.0518	1.67412	20.2446	36.4539	22.6462	-13.4492	5.38551	-0.669645														23.4966	63.6575	71.0327
12.55	9.64887	0.00313057	0.00105966	-77.3348	4.66746	13.4466	2.93523	5.37224	-0.558845	12.0894	27.2486	17.9514	-15.0212	5.27119	-2.05159														14.8128	40.5009	43.8488
12.6	9.70267	0.00326292	0.00105704	-75.4527	4.85127	13.9367	3.37639	5.56131	-0.40129	12.6649	28.0604	18.3655	-15.1852	5.25926	-2.19579														15.4255	42.1348	45.7669
12.65	9.75646	0.0038794	0.00106777	-67.5864	5.70749	16.22	5.43132	6.44199	0.332614	15.3452	31.4537	20.0961	-14.5142	5.30806	-1.60591														18.2796	49.7456	54.7014
12.7	9.81025	0.00423473	0.00105114	-63.6028	6.20101	17.536	6.61576	6.94961	0.755629	16.8901	33.1722	20.9725	-15.5538	5.23245	-2.51979														19.9247	54.1325	59.8511
12.75	9.86405	0.0043323	0.00104304	-62.5673	6.33653	17.8974	6.94101	7.08901	0.87179	17.3144	33.6188	21.2003	-16.0598	5.19565	-2.96466														20.3764	55.3371	61.2653
12.8	9.91784	0.004705	0.00102383	-58.8161	6.85417	19.2778	8.18335	7.62143	1.31548	18.9348	35.237	22.0255	-17.2605	5.10833	-4.02018														22.1019	59.9383	66.6667
12.85	9.97164	0.00110876	0.000993554	-124.516	1.85938	5.95836	-3.80414	2.48394	-2.96577	3.29894	6.89609	7.57166	-19.1528	4.9707	-5.68382														5.45258	15.5402	14.5472
12.9	10.0254	0.00438185	0.000964274	-62.0505	6.40534	18.0809	7.10616	7.15978	0.930771	17.5298	33.8418	21.314	-20.9829	4.83761	-7.29264														20.6058	55.9487	61.9833
12.95	10.0792	0.00789933	0.000948723	-35.2638	11.2907	31.1086	18.8311	12.1848	5.11825	32.8232	45.3968	27.207	-21.9548	4.76692	-8.1471														36.8904	99.3744	112.961
13	10.133	0.00516783	0.000936407	-54.5512	7.49699	20.992	9.72611	8.28262	1.86647	20.9471	37.0768	22.9638	-22.7246	4.71094	-8.8238														24.2446	65.6523	73.3744
13.05	10.1868	0.0044145	0.00090526	-61.713	6.4507	18.2019	7.21502	7.20644	0.969649	17.6718	33.9874	21.3882	-24.6712	4.56936	-10.5351														20.757	56.3519	62.4566
13.1	10.2406	0.00463588	0.000879338	-59.4889	6.75816	19.0218	7.95292	7.52268	1.23319	18.6342	34.9468	21.8775	-26.2914	4.45154	-11.9594														21.7818	59.0849	65.6649
13.15	10.2944	0.00475676	0.000886788	-58.3189	6.92605	19.4695	8.35586	7.69537	1.37709	19.1598	35.4515	22.1349	-25.8258	4.4854	-11.5501														22.3415	60.5773	67.4168
13.2	10.3482	0.0057099	0.000859455	-50.0172	8.24987	22.9996	11.533	9.057	2.51179	23.3039	39.0326	23.9613	-27.534	4.36116	-13.0519														26.7542	72.3445	81.2305
13.25	10.402	0.00508321	0.0008567	-55.3017	7.37946	20.6786	9.44404	8.16173	1.76573	20.5792	36.753	22.7987	-27.7063	4.34864	-13.2033														23.8528	64.6076	72.148
13.3	10.4558	0.00505926	0.000875265	-55.5164	7.34619	20.5898	9.36419	8.12751	1.73721	20.475	36.6604	22.7515	-26.546	4.43302	-12.1833														23.7419	64.3118	71.8008
13.35	10.5096	0.00459899	0.000865266	-59.852	6.70694	18.8852	7.82998	7.46999	1.18928	18.4739	34.7902	21.7976	-27.1709	4.38757	-12.7326														21.6111	58.6296	65.1304
13.4	10.5634	0.00326182	0.000873646	-75.468	4.84975	13.9327	3.37273	5.55974	-0.402595	12.6601	28.0539	18.3621	-26.6472	4.42566	-12.2722														15.4205	42.1212	45.751
13.45	10.6172	0.0049737	0.000854773	-56.2916	7.22737	20.273	9.07901	8.00529	1.63536	20.1031	36.326	22.5809	-27.8267	4.33988	-13.3092														23.3459	63.2556	70.5609
13.5	10.671	0.00410683	0.000846276	-64.9968	6.02338	17.0623	6.18945	6.76691	0.603373	16.3341	32.5709	20.6658	-28.3578	4.30125	-13.776														19.3326	52.5535	57.9976
13.55	10.7248	0.00540976	0.000862857	-52.4717	7.833	21.888	10.5325	8.62822	2.15447	21.9989	37.9738	23.4213	-27.3214	4.37662	-12.865														25.3646	68.639	76.8805
13.6	10.7786	0.00435093	0.000864857	-62.3723	6.36241	17.9664	7.00311	7.11562	0.893969	17.3954	33.703	21.2432	-27.1964	4.38571	-12.7551														20.4627	55.5671	61.5353
13.65	10.8324	0.00228887	0.000869932	-91.5692	3.49844	10.3292	0.129578	4.16982	-1.56086	8.42988	21.1083	14.8199	-26.8793	4.40878	-12.4763														10.9161	30.1095	31.6503
13.7	10.8862	0.0031942	0.000865326	-76.4202	4.75583	13.6822	3.14734	5.46314	-0.483094	12.3661	27.6431	18.1526	-27.1672	4.38784	-12.7294														15.1074	41.2864	44.771
13.75	10.9399	0.00270073	0.000874325	-84.0482	4.07046	11.8545	1.50243	4.75818	-1.07056	10.2206	24.3526	16.4745	-26.6047	4.42875	-12.2349														12.8228	35.1942	37.6193
13.8	10.9937	0.00529436	0.000855085	-53.4518	7.67272	21.4606	10.1479	8.46337	2.01709	21.4972	37.551	23.2057	-27.8072	4.34129	-13.2921														24.8304	67.2143	75.2081
13.85	11.057	0.00371305	0.000826731	-69.5785	5.47646	15.6039	4.87685	6.20436	0.134588	14.622	30.5944	19.6578	-29.5793	4.21242	-14.8499														17.5095	47.692	52.2906
13.9	11.1216	0.00104102	0.000803901	-127.381	1.7653	5.70748	-4.02994	2.38717	-3.04641	3.00443	5.66003	6.94127	-31.0062	4.10864	-16.1043														5.13898	14.7039	13.5655
13.95	11.1862	0.00445689	0.00082283	-61.2786	6.50957	18.3589	7.35631	7.26699	1.02011	17.8561	34.1748	21.4838	-29.8231	4.19468	-15.0643														20.9532	56.8752	63.0709
14	11.2507	0.00232836	0.000826938	-90.7917	3.55327	10.4754	0.261193	4.22623	-1.51386	8.60156	21.4436	14.9909	-29.5664	4.21335	-14.8386														11.0989	30.597	32.2226
14.05	11.3153	0.0037429	0.0008449	-69.2146	5.51792	15.7144	4.97634	6.247	0.17012	14.7517	30.7514	19.7379	-28.4437	4.295	-13.8516														17.6477	48.0605	52.7232
14.1	11.3798	0.00418002	0.000836838	-64.1938	6.12503	17.3334	6.43341	6.87146	0.690505	16.6523	32.9172	20.8424	-28.9476	4.25836	-14.2946														19.6714	53.4571	59.0583
14.15	11.4444	0.00502114	0.000778109	-55.8602	7.29325	20.4487	9.23714	8.07306	1.69184	20.3093	36.5121	22.6758	-32.6182	3.9914	-17.5215														23.5655	63.8413	71.2484
14.2	11.5089	0.00608707	0.000619149	-47.1097	8.77371	24.3966	12.7902	9.59581	2.9608	24.9438	40.2868	24.6009	-42.5532	3.26886	-26.2556														28.5003	77.0009	86.6967
14.25	11.5735	0.00682118	0.000415559	-41.934	9.79331	27.1155	15.2373	10.6445	3.83474	28.1356	42.5195	25.7396	-55.2776	2.34345	-37.4418														31.899	86.0639	97.3359
14.3	11.638	0.0064334	0.000273144	-44.5945	9.25472	25.6793	13.9447	10.0906	3.37309	26.4496	41.3719	25.1543	-64.1785	1.69611	-45.2668														30.1037	81.2765	91.7159
14.35	11.7026
14.4	11.7671
14.45	11.8317	0.00554721	0.000206017	-51.3312	8.02391	22.3971	10.9907	8.82459	2.31811	22.5966	38.4658	23.6722	-68.3739	1.39099	-48.9551														26.001	70.336	78.8727
14.5	11.8962	0.00541751	0.000374558	-52.4066	7.84376	21.9167	10.5584	8.6393	2.1637	22.0326	38.0019	23.4356	-57.8401	2.15708	-39.6946														25.4005	68.7347	76.9929
14.55	11.9608	0.00552569	0.000513523	-51.5078	7.99402	22.3174	10.919	8.79385	2.29249	22.503	38.3896	23.6334	-49.1548	2.78874	-32.0592														25.9014	70.0703	78.5608
14.6	12.0181	0.00695496	0.000611358	-41.0512	9.97911	27.6109	15.6832	10.8357	3.994	28.7172	42.9003	25.9338	-43.0402	3.23344	-26.6837														32.5183	87.7155	99.2747
14.65	12.0642	0.00645344	0.000729262	-44.4531	9.28256	25.7535	14.0115	10.1192	3.39695	26.5367	41.4328	25.1854	-35.6711	3.76937	-20.2054														30.1965	81.524	92.0064
14.7	12.1103
14.75	12.1564
14.8	12.2025		0.000621272										-42.4205	3.27851	-26.1389
14.85	12.2487		0.00054118										-47.4262	2.91446	-30.5395
14.9	12.2948		0.000479587										-51.2758	2.63449	-33.9238
14.95	12.3409	0.000605551	0.000418779	-152.009	1.16049	4.09463	-5.4815	1.76507	-3.56482	1.11109	-4.96383	1.5231	-55.0763	2.35809	-37.2649														3.12292	9.32779	7.25436
15	12.387		0.000361404										-58.6623	2.09729	-40.4174
15.05	12.4376	0.00111774	0.000334115	-124.149	1.87187	5.99164	-3.77419	2.49678	-2.95507	3.33801	7.05437	7.65238	-60.3678	1.97325	-41.9168														5.49418	15.6511	14.6774
15.1	12.5298	0.00018255	0.000337135	-206.514	0.572986	2.52796	-6.8915	1.16079	-4.06839	-0.728044	-28.4759	-10.4681	-60.1791	1.98698	-41.7508														1.16458	4.10555	1.12391
15.15	12.6221		0.000349376										-59.414	2.04262	-41.0782
15.2	12.7143	0.000570709	0.000353235	-154.703	1.1121	3.96559	-5.59764	1.7153	-3.6063	0.959605	-6.12577	0.930509	-59.1728	2.06016	-40.8662														2.96162	8.89764	6.74941
						19.9125				19.6799	33.5999

## Sheet: M4
original data																													12.0107	15.9994	22.9897	24.305	26.9815	28.0855	30.9738	32.065	35.453	39.0983	40.078	47.867	50.942	51.9961	54.938	55.845	58.9332	58.6934	63.546	65.39	79.904
d	Spectrum	C	O	Na	Mg	Al	Si	P	S	Cl	K	Ca	Ti	V	Cr	Mn	Fe	Co	Ni	Cu	Zn	Br	Rb	Sr	Rh	Ba	Pb	trimmed	C	O	Na	Mg	Al	Si	P	S	Cl	K	Ca	Ti	V	Cr	Mn	Fe	Co	Ni	Cu	Zn	Br
0	Line_4_001	11.0922	47.4334	0.0138567	0.00648371	0.0572836	1.54734	0.000591306	0.0371777	0.191887	0.072404	36.9709	0.620906	0	0.000360074	0.0418107	1.8316	0.00189587	0	0.000368343	0.0109278	0.0018124	0	0.0666499	0	0	0.000149154
0.05	Line_4_002	11.1412	47.5663	0	0.0405269	0.0696598	1.62448	0.000741685	0.0457221	0.154999	0.0687938	37.078	0.578203	0	0.000277848	0.0478034	1.49979	0.00160409	0	0.00022562	0.0105335	0.00261687	0	0.0674272	0	0	0.00111498
0.1	Line_4_003	11.2018	47.7275	0	0.0547524	0.0771711	1.74554	0.00097548	0.0648324	0.0985492	0.0568699	37.2566	0.419064	0	0.00187887	0.0592414	1.15141	0.00157377	0	0.000403616	0.0107136	0.00234452	0	0.0676944	0	0	0.0010437
0.15	Line_4_004	11.355	47.8827	0	0.0408686	0.0817602	1.58318	0.00077126	0.0842832	0.0404506	0.026796	37.791	0.255573	0	0.00158303	0.0726786	0.701987	0.00125178	0	0	0.00987578	0.00236949	0	0.0670739	0	0	0.000772373
0.2	Line_4_005	11.5999	47.9893	0.0334297	0.118254	0.0714136	1.00957	0.000601932	0.116138	0	0.000256132	38.4806	0.119227	0	0	0.0830076	0.297412	0.000100193	0	0	0.00646664	0.00223776	0	0.0672792	0	0.00322414	0.00149539
0.25	Line_4_006	11.8383	47.9907	0	0.125335	0.0343186	0.335303	0.000963728	0.117015	0	0	39.2649	0.0461022	0	0	0.0886871	0.0832108	0.000600593	0	0.000126806	0.00540097	0.00228615	0	0.0656534	0	0	0.00119542		11.8383	47.9907		0.125335	0.0343186	0.335303	0.000963728	0.117015			39.2649	0.0461022			0.0886871	0.0832108	0.000600593		0.000126806	0.00540097	0.00228615
0.3	Line_4_007	11.9042	47.9813	0	0.153927	0.0337481	0.1008	0.00093318	0.120159	0	0	39.4374	0.0540419	0	0	0.0946055	0.0444244	0.000786564	0	0.000450064	0.00467391	0.00210681	0	0.0664491	0	0	6.76309e-05		11.9042	47.9813		0.153927	0.0337481	0.1008	0.00093318	0.120159			39.4374	0.0540419			0.0946055	0.0444244	0.000786564		0.000450064	0.00467391	0.00210681
0.35	Line_4_008	11.9041	47.9759	0	0.124984	0.0359829	0.0918542	0.00105049	0.132036	0	0	39.4851	0.0306031	0	0	0.0982624	0.0436648	0.00195927	0	0.00110834	0.00433826	0.00235687	0	0.0660947	0	0	0.000528845		11.9041	47.9759		0.124984	0.0359829	0.0918542	0.00105049	0.132036			39.4851	0.0306031			0.0982624	0.0436648	0.00195927		0.00110834	0.00433826	0.00235687
0.4	Line_4_009	11.9203	47.9903	0	0.16536	0.0329857	0.0522663	0.00184794	0.139119	0	0	39.472	0.0107177	0	0	0.0955704	0.044182	0.00113256	0	0.000306803	0.00438572	0.00176823	0	0.0668749	0	0	0.000915375		11.9203	47.9903		0.16536	0.0329857	0.0522663	0.00184794	0.139119			39.472	0.0107177			0.0955704	0.044182	0.00113256		0.000306803	0.00438572	0.00176823
0.45	Line_4_010	11.9092	47.9801	0	0.121685	0.0285419	0.0730926	0.00192486	0.143153	0	0	39.507	0.0235528	0.000410712	0	0.0924436	0.0464986	0.00139558	0	0.000173356	0.00326102	0.000871359	0	0.0667007	0	0	0		11.9092	47.9801		0.121685	0.0285419	0.0730926	0.00192486	0.143153			39.507	0.0235528	0.000410712		0.0924436	0.0464986	0.00139558		0.000173356	0.00326102	0.000871359
0.5	Line_4_011	11.904	47.9837	0	0.165882	0.0348374	0.0838063	0.00266249	0.126293	0	0	39.4168	0.0703015	0.000868013	0	0.0901617	0.046262	0.00082421	0	0.001019	0.00208375	0.000450094	0	0.0672895	0	0.0018145	0.000946275		11.904	47.9837		0.165882	0.0348374	0.0838063	0.00266249	0.126293			39.4168	0.0703015	0.000868013		0.0901617	0.046262	0.00082421		0.001019	0.00208375	0.000450094
0.55	Line_4_012	11.9099	47.9543	0	0.0788557	0.0294186	0.0727076	0.00203867	0.112576	0	0	39.5799	0.051729	0.000827168	0	0.0881449	0.0430226	0.00038148	0	0.00143424	0.00240711	0.00115377	0	0.0674962	0	0.00218938	0.00148115		11.9099	47.9543		0.0788557	0.0294186	0.0727076	0.00203867	0.112576			39.5799	0.051729	0.000827168		0.0881449	0.0430226	0.00038148		0.00143424	0.00240711	0.00115377
0.6	Line_4_013	11.9103	47.9623	0.0296715	0.134178	0.0394559	0.0995546	0.00147748	0.0897512	0	0	39.4901	0.0412525	0	0	0.0859814	0.0423768	0.00187678	0	0.00043348	0.00226563	0.00174289	0	0.0669815	0	0	0.000352203		11.9103	47.9623	0.0296715	0.134178	0.0394559	0.0995546	0.00147748	0.0897512			39.4901	0.0412525			0.0859814	0.0423768	0.00187678		0.00043348	0.00226563	0.00174289
0.65	Line_4_014	11.9254	47.9581	0	0.0939519	0.033705	0.0727124	0.00142759	0.0898926	0	0	39.6069	0.0163109	0	0	0.0851622	0.0370877	0.00396201	0.000207937	0.000982824	0.00257552	0.00141262	0	0.0664934	0	0.00378341	0		11.9254	47.9581		0.0939519	0.033705	0.0727124	0.00142759	0.0898926			39.6069	0.0163109			0.0851622	0.0370877	0.00396201	0.000207937	0.000982824	0.00257552	0.00141262
0.7	Line_4_015	11.9311	47.9827	0	0.155096	0.030304	0.0730042	0.00150941	0.100446	0	0	39.5251	0.00175118	0	0	0.0833046	0.0328182	0.00322882	0	0.000792981	0.00353258	0.00103226	0	0.066952	0	0.0064448	0.000892055		11.9311	47.9827		0.155096	0.030304	0.0730042	0.00150941	0.100446			39.5251	0.00175118			0.0833046	0.0328182	0.00322882		0.000792981	0.00353258	0.00103226
0.75	Line_4_016	11.9169	47.9661	0	0.0787834	0.0305221	0.0701162	0.00261485	0.127134	0	0	39.604	0.00483927	0	0	0.0873495	0.0304444	0.00638165	0	0.00112407	0.00446075	0.00139053	0	0.0659568	0	0	0.00179912		11.9169	47.9661		0.0787834	0.0305221	0.0701162	0.00261485	0.127134			39.604	0.00483927			0.0873495	0.0304444	0.00638165		0.00112407	0.00446075	0.00139053
0.8	Line_4_017	11.9078	47.985	0	0.120946	0.0296189	0.0653012	0.00284398	0.159394	0.000585575	0	39.5044	0.0188607	0	0.000455931	0.0945048	0.0336304	0.0036037	0	0.000454639	0.00470953	0.00143907	0	0.0655015	0	0	0.000923176		11.9078	47.985		0.120946	0.0296189	0.0653012	0.00284398	0.159394	0.000585575		39.5044	0.0188607		0.000455931	0.0945048	0.0336304	0.0036037		0.000454639	0.00470953	0.00143907
0.85	Line_4_018	11.9061	48.0133	0	0.214688	0.0326895	0.0798404	0.00255258	0.165469	0	0	39.3444	0.0197114	0	0.000234704	0.105214	0.0420668	0.00230374	0.000451474	0.000148572	0.00466857	0.00141574	0	0.0646779	0	0	5.36186e-05		11.9061	48.0133		0.214688	0.0326895	0.0798404	0.00255258	0.165469			39.3444	0.0197114		0.000234704	0.105214	0.0420668	0.00230374	0.000451474	0.000148572	0.00466857	0.00141574
0.9	Line_4_019	11.917	47.9712	0	0.109963	0.0287045	0.0504088	0.00190812	0.14191	0	0	39.5526	0.0011822	0	0	0.104255	0.0428053	0.00239955	0	0.00021417	0.00331225	0.00183651	0	0.0667639	0	0.00205778	0.00146681		11.917	47.9712		0.109963	0.0287045	0.0504088	0.00190812	0.14191			39.5526	0.0011822			0.104255	0.0428053	0.00239955		0.00021417	0.00331225	0.00183651
0.95	Line_4_020	11.9204	47.9864	0	0.164019	0.034457	0.0830953	0.00178715	0.113846	0	0	39.4744	0.0110766	0	0	0.089565	0.0402065	0.00170476	0	4.63635e-06	0.0020461	0.0013838	0	0.0677844	0	0.00526671	0.00251578		11.9204	47.9864		0.164019	0.034457	0.0830953	0.00178715	0.113846			39.4744	0.0110766			0.089565	0.0402065	0.00170476		4.63635e-06	0.0020461	0.0013838
1	Line_4_021	11.9247	47.9977	0	0.190978	0.0345749	0.0816405	0.00159535	0.107571	0	0	39.4437	0.0301991	0	0.00119272	0.0727168	0.034148	0.0033094	0	5.30741e-05	0.00258236	0.00130393	0	0.0689192	0	0	0.00310382		11.9247	47.9977		0.190978	0.0345749	0.0816405	0.00159535	0.107571			39.4437	0.0301991		0.00119272	0.0727168	0.034148	0.0033094		5.30741e-05	0.00258236	0.00130393
1.05	Line_4_022	11.9039	47.9829	0	0.083445	0.0328424	0.0932594	0.00196627	0.148588	0	0	39.5515	0.0327283	6.55819e-05	0.00269277	0.058079	0.0269545	0.00695634	0	0.000316223	0.00213937	0.000967005	0	0.0689262	0	0	0.00174981		11.9039	47.9829		0.083445	0.0328424	0.0932594	0.00196627	0.148588			39.5515	0.0327283	6.55819e-05	0.00269277	0.058079	0.0269545	0.00695634		0.000316223	0.00213937	0.000967005
1.1	Line_4_023	11.9041	48.0156	0	0.148022	0.029343	0.0742598	0.00209995	0.188425	0	0	39.4449	0.0387852	0.00173437	0.00109019	0.0442514	0.0196699	0.00451928	0	0.000504333	0.00257595	0.0014454	0	0.0703956	0	0.00500876	0.00332406		11.9041	48.0156		0.148022	0.029343	0.0742598	0.00209995	0.188425			39.4449	0.0387852	0.00173437	0.00109019	0.0442514	0.0196699	0.00451928		0.000504333	0.00257595	0.0014454
1.15	Line_4_024	11.9129	48.0019	0	0.106296	0.025121	0.0808391	0.00212374	0.16225	0	0	39.5436	0.0240843	0.000961909	0	0.0388394	0.0156184	0.00158554	0	0.000775167	0.00257997	0.00187411	0	0.0694153	0	0.00580233	0.0034296		11.9129	48.0019		0.106296	0.025121	0.0808391	0.00212374	0.16225			39.5436	0.0240843	0.000961909		0.0388394	0.0156184	0.00158554		0.000775167	0.00257997	0.00187411
1.2	Line_4_025	11.9341	47.9856	0	0.109833	0.033639	0.0758696	0.00191207	0.102519	0	0	39.609	0	0	0	0.0504531	0.0132483	0.00193443	0	0.00195084	0.00419691	0.00134103	0	0.0686454	0	0.00469013	0.00113455		11.9341	47.9856		0.109833	0.033639	0.0758696	0.00191207	0.102519			39.609				0.0504531	0.0132483	0.00193443		0.00195084	0.00419691	0.00134103
1.25	Line_4_026	11.9407	47.9914	0	0.159803	0.0282856	0.060342	0.00154318	0.100402	0	0	39.5489	0	0	0	0.06509	0.0149776	0.00324599	0	0.00383957	0.0059575	0.00170963	0	0.0676125	0	0.00539602	0.000818287		11.9407	47.9914		0.159803	0.0282856	0.060342	0.00154318	0.100402			39.5489				0.06509	0.0149776	0.00324599		0.00383957	0.0059575	0.00170963
1.3	Line_4_027	11.9345	47.9843	0	0.128184	0.0274681	0.0681923	0.00133043	0.106111	0	0	39.5813	0	0	0.000149378	0.0674382	0.0176118	0.00607469	0	0.00159416	0.00587052	0.0026169	0	0.0658348	0	0	0.00143413		11.9345	47.9843		0.128184	0.0274681	0.0681923	0.00133043	0.106111			39.5813			0.000149378	0.0674382	0.0176118	0.00607469		0.00159416	0.00587052	0.0026169
1.35	Line_4_028	11.9265	47.9748	0	0.101848	0.0359078	0.0784652	0.001366	0.102192	0	0	39.5981	0.0123383	0	0	0.0694414	0.0199837	0.00505495	0	0.00030378	0.00364082	0.00215452	0	0.0657359	0	0	0.00220582		11.9265	47.9748		0.101848	0.0359078	0.0784652	0.001366	0.102192			39.5981	0.0123383			0.0694414	0.0199837	0.00505495		0.00030378	0.00364082	0.00215452
1.4	Line_4_029	11.9272	47.9801	0	0.128504	0.0311664	0.0650398	0.00114533	0.108969	0	0	39.5562	0.0277044	0	0	0.0747569	0.021367	0.00271256	0	0.000876868	0.00262679	0.00251835	0	0.0661052	0	0	0.0029633		11.9272	47.9801		0.128504	0.0311664	0.0650398	0.00114533	0.108969			39.5562	0.0277044			0.0747569	0.021367	0.00271256		0.000876868	0.00262679	0.00251835
1.45	Line_4_030	11.9206	47.9785	0	0.124206	0.028952	0.0711813	0.00182936	0.116089	0	0	39.5414	0.0353818	0	0.00119811	0.0813467	0.0224038	0.00218277	0	0.0003737	0.00272942	0.00197092	0	0.0660308	0	0	0.00364885		11.9206	47.9785		0.124206	0.028952	0.0711813	0.00182936	0.116089			39.5414	0.0353818		0.00119811	0.0813467	0.0224038	0.00218277		0.0003737	0.00272942	0.00197092
1.5	Line_4_031	11.9244	47.9671	0	0.101543	0.0265564	0.0627931	0.0016891	0.106679	0	0	39.5911	0.0328205	0	0.000318283	0.0856597	0.0231799	0.00215943	0.000327709	0.000889715	0.00239721	0.00125617	0	0.0666163	0	0	0.00246335		11.9244	47.9671		0.101543	0.0265564	0.0627931	0.0016891	0.106679			39.5911	0.0328205		0.000318283	0.0856597	0.0231799	0.00215943	0.000327709	0.000889715	0.00239721	0.00125617
1.55	Line_4_032	11.904	47.9575	0.0684389	0.145188	0.0288792	0.0688579	0.00215007	0.127882	0.0122633	0	39.4511	0.0387561	0	0.000606603	0.091782	0.0248574	0.00322173	9.78853e-05	0.00211512	0.00315679	0.00145544	0	0.0665675	0	0	0.00111614		11.904	47.9575	0.0684389	0.145188	0.0288792	0.0688579	0.00215007	0.127882	0.0122633		39.4511	0.0387561		0.000606603	0.091782	0.0248574	0.00322173	9.78853e-05	0.00211512	0.00315679	0.00145544
1.6	Line_4_033	11.8968	47.9612	0	0.10685	0.0263828	0.0720305	0.00229273	0.144316	0.0161951	0	39.4899	0.0806922	0	0.00154685	0.0938911	0.0263948	0.00450704	9.63705e-05	0.00272652	0.00377582	0.00134898	0	0.0676152	0	0	0.00134195		11.8968	47.9612		0.10685	0.0263828	0.0720305	0.00229273	0.144316	0.0161951		39.4899	0.0806922		0.00154685	0.0938911	0.0263948	0.00450704	9.63705e-05	0.00272652	0.00377582	0.00134898
1.65	Line_4_034	11.8809	47.9844	0	0.132145	0.0285519	0.0993851	0.00180189	0.181445	0.00881132	0	39.3942	0.0756521	0	0.0015253	0.0990177	0.028706	0.00543065	0.000296193	0.00119172	0.0038158	0.0017031	0	0.0691433	0	0	0.00192926		11.8809	47.9844		0.132145	0.0285519	0.0993851	0.00180189	0.181445	0.00881132		39.3942	0.0756521		0.0015253	0.0990177	0.028706	0.00543065	0.000296193	0.00119172	0.0038158	0.0017031
1.7	Line_4_035	11.8722	47.9656	0.0613049	0.103045	0.0256848	0.0711392	0.00152986	0.206801	0	0	39.4138	0.0608008	0	0.000790104	0.100575	0.0316606	0.00751586	0	0.000837926	0.00462498	0.00247064	0	0.0683296	0	0	0.00121244		11.8722	47.9656	0.0613049	0.103045	0.0256848	0.0711392	0.00152986	0.206801			39.4138	0.0608008		0.000790104	0.100575	0.0316606	0.00751586		0.000837926	0.00462498	0.00247064
1.75	Line_4_036	11.8793	48.0027	0	0.136693	0.0297767	0.0670366	0.00140544	0.237269	0	0	39.383	0.0365608	0	0.00142107	0.100887	0.032768	0.00910968	0	0.000826121	0.00626205	0.00294506	0	0.0659016	0	0.00543647	0.000673324		11.8793	48.0027		0.136693	0.0297767	0.0670366	0.00140544	0.237269			39.383	0.0365608		0.00142107	0.100887	0.032768	0.00910968		0.000826121	0.00626205	0.00294506
1.8	Line_4_037	11.9017	48.0009	0	0.188629	0.0339281	0.0636087	0.00136534	0.192957	0	0	39.3727	0	0	0.00151853	0.0932215	0.0285811	0.00884883	0	0.000637436	0.00734348	0.00166627	0	0.0643334	0	0.0368362	0.00119698		11.9017	48.0009		0.188629	0.0339281	0.0636087	0.00136534	0.192957			39.3727			0.00151853	0.0932215	0.0285811	0.00884883		0.000637436	0.00734348	0.00166627
1.85	Line_4_038	11.8876	48.0008	0	0.148559	0.0299885	0.0689484	0.00120476	0.230316	0	0	39.3923	0	0	0.00212131	0.0858964	0.0280666	0.0135916	0	0.00166454	0.00620582	0.00171685	0	0.0635178	0	0.0350188	0.00247196		11.8876	48.0008		0.148559	0.0299885	0.0689484	0.00120476	0.230316			39.3923			0.00212131	0.0858964	0.0280666	0.0135916		0.00166454	0.00620582	0.00171685
1.9	Line_4_039	11.8734	48.0106	0	0.121749	0.028488	0.0699118	0.00156745	0.256562	0	0	39.3888	0.0478581	8.70642e-05	2.38097e-05	0.08657	0.0286362	0.0102145	0	0.00209416	0.0056615	0.00193852	0	0.0639946	0	0	0.00185783		11.8734	48.0106		0.121749	0.028488	0.0699118	0.00156745	0.256562			39.3888	0.0478581	8.70642e-05	2.38097e-05	0.08657	0.0286362	0.0102145		0.00209416	0.0056615	0.00193852
1.95	Line_4_040	11.8791	48.0154	0	0.164281	0.0353175	0.100939	0.00220058	0.222646	0	0	39.3372	0.0344276	0.0110734	0	0.0847993	0.0294819	0.00771372	0	0.00133067	0.00496283	0.00217027	0	0.0648903	0	0	0.00213498		11.8791	48.0154		0.164281	0.0353175	0.100939	0.00220058	0.222646			39.3372	0.0344276	0.0110734		0.0847993	0.0294819	0.00771372		0.00133067	0.00496283	0.00217027
2	Line_4_041	11.9066	47.9995	0	0.149314	0.0323466	0.0772275	0.00185097	0.162012	0	0	39.454	0.0286646	0.000586318	0.00118995	0.0824507	0.0268844	0.00324635	0	0.000568991	0.00475573	0.00172516	0	0.0648018	0	0	0.00224407		11.9066	47.9995		0.149314	0.0323466	0.0772275	0.00185097	0.162012			39.454	0.0286646	0.000586318	0.00118995	0.0824507	0.0268844	0.00324635		0.000568991	0.00475573	0.00172516
2.05	Line_4_042	11.9158	47.9507	0	0.0375427	0.0326011	0.0859946	0.00123581	0.10905	0	0	39.6681	0.00420736	1.38583e-05	0	0.0829711	0.02861	0.00205029	0	0.000567881	0.00418452	0.00189311	0	0.0660212	0	0.00705447	0.00135957		11.9158	47.9507		0.0375427	0.0326011	0.0859946	0.00123581	0.10905			39.6681	0.00420736	1.38583e-05		0.0829711	0.02861	0.00205029		0.000567881	0.00418452	0.00189311
2.1	Line_4_043	11.9314	47.9484	0	0.0696732	0.0233285	0.0529058	0.00156409	0.0974012	0	0	39.6669	0	0	0	0.0811001	0.0289636	0.00335963	0	0.000209388	0.0037309	0.0020008	0	0.0666618	0	0.0212096	0.00120118		11.9314	47.9484		0.0696732	0.0233285	0.0529058	0.00156409	0.0974012			39.6669				0.0811001	0.0289636	0.00335963		0.000209388	0.0037309	0.0020008
2.15	Line_4_044	11.9135	47.9772	0	0.129841	0.032957	0.0915977	0.00176602	0.129051	0	0	39.5082	0	0	0.000691009	0.0780699	0.0286637	0.00582962	0	0.000908245	0.00273931	0.00202174	0	0.0661521	0	0.0291725	0.00171521		11.9135	47.9772		0.129841	0.032957	0.0915977	0.00176602	0.129051			39.5082			0.000691009	0.0780699	0.0286637	0.00582962		0.000908245	0.00273931	0.00202174
2.2	Line_4_045	11.9055	47.9849	0	0.118623	0.0305412	0.0660621	0.00157361	0.176299	0	0	39.5002	0	0	0.00121811	0.0770111	0.0291752	0.00647505	0	0.00197777	0.00309275	0.00190776	0	0.0660801	0	0.0271458	0.00214697		11.9055	47.9849		0.118623	0.0305412	0.0660621	0.00157361	0.176299			39.5002			0.00121811	0.0770111	0.0291752	0.00647505		0.00197777	0.00309275	0.00190776
2.25	Line_4_046	11.8954	47.9778	0	0.0768796	0.0346698	0.0713827	0.00133608	0.177845	0	0	39.536	0.0326585	0.00044434	0.000139597	0.0835025	0.0309931	0.00393368	0	0.000671809	0.00444534	0.00142822	0	0.0646894	0	0.00470297	0.00113056		11.8954	47.9778		0.0768796	0.0346698	0.0713827	0.00133608	0.177845			39.536	0.0326585	0.00044434	0.000139597	0.0835025	0.0309931	0.00393368		0.000671809	0.00444534	0.00142822
2.3	Line_4_047	11.9122	47.985	0.00171636	0.139111	0.0329796	0.0603982	0.000771447	0.138109	0	0	39.4901	0.0544979	0	0.000691586	0.0814535	0.0308143	0.00209974	0	0.000232926	0.00507718	0.000821314	0	0.063223	0	0	0.000742519		11.9122	47.985	0.00171636	0.139111	0.0329796	0.0603982	0.000771447	0.138109			39.4901	0.0544979		0.000691586	0.0814535	0.0308143	0.00209974		0.000232926	0.00507718	0.000821314
2.35	Line_4_048	11.9169	47.9708	0	0.108565	0.0292437	0.0653554	0.0014495	0.119643	0	0	39.5564	0.0373483	0	0.000422191	0.0853688	0.0360506	0.00222224	0.000741964	7.11457e-05	0.00579633	0.000970029	0	0.0626698	0	0	0		11.9169	47.9708		0.108565	0.0292437	0.0653554	0.0014495	0.119643			39.5564	0.0373483		0.000422191	0.0853688	0.0360506	0.00222224	0.000741964	7.11457e-05	0.00579633	0.000970029
2.4	Line_4_049	11.9091	47.9578	0.0298362	0.10021	0.0305877	0.0806082	0.00163497	0.123022	0	0	39.5434	0	0	5.20464e-05	0.0933518	0.0506078	0.00395551	0.000436341	0.000439607	0.00873203	0.0022692	0	0.0639858	0	0	0		11.9091	47.9578	0.0298362	0.10021	0.0305877	0.0806082	0.00163497	0.123022			39.5434			5.20464e-05	0.0933518	0.0506078	0.00395551	0.000436341	0.000439607	0.00873203	0.0022692
2.45	Line_4_050	11.9072	47.9546	0	0.119632	0.0255847	0.0687242	0.000992358	0.1276	0	0	39.5044	0	0	0	0.0968937	0.108981	0.00511045	0.0012121	5.55865e-05	0.010662	0.00306496	0	0.065357	0	0	0		11.9072	47.9546		0.119632	0.0255847	0.0687242	0.000992358	0.1276			39.5044				0.0968937	0.108981	0.00511045	0.0012121	5.55865e-05	0.010662	0.00306496
2.5	Line_4_051	11.8907	47.9386	0	0.0823407	0.0281954	0.0662579	0.000611195	0.148822	0	0	39.5103	0	0.000508072	3.74201e-05	0.0897193	0.159377	0.00439656	0	0.000278038	0.00902952	0.00393213	0	0.0669058	0	0	0		11.8907	47.9386		0.0823407	0.0281954	0.0662579	0.000611195	0.148822			39.5103		0.000508072	3.74201e-05	0.0897193	0.159377	0.00439656		0.000278038	0.00902952	0.00393213
2.55	Line_4_052	11.8859	47.9578	0	0.115043	0.0342683	0.0916336	0.0010426	0.14895	0	0	39.44	0.0133779	0	0.000818226	0.0700542	0.161675	0.00312245	0	0.000181463	0.00463335	0.00398826	0	0.0674996	0	0	0		11.8859	47.9578		0.115043	0.0342683	0.0916336	0.0010426	0.14895			39.44	0.0133779		0.000818226	0.0700542	0.161675	0.00312245		0.000181463	0.00463335	0.00398826
2.6	Line_4_053	11.9181	47.9571	0	0.115183	0.0315543	0.0754248	0.00124932	0.0969476	0	0	39.5467	0.00322502	0.00035133	0.000768802	0.0565953	0.114436	0.0018729	0	0	0.00178746	0.00370322	0	0.0687955	0	0.00603885	0.000180474		11.9181	47.9571		0.115183	0.0315543	0.0754248	0.00124932	0.0969476			39.5467	0.00322502	0.00035133	0.000768802	0.0565953	0.114436	0.0018729			0.00178746	0.00370322
2.65	Line_4_054	11.9281	47.9513	0	0.0339002	0.029014	0.0898878	0.00246301	0.0792084	0	0	39.7134	0	0.000412987	0.00190437	0.0437131	0.0462387	0.00148878	0	0.000198072	0.00190326	0.00248244	0	0.0701043	0	0.00431468	0		11.9281	47.9513		0.0339002	0.029014	0.0898878	0.00246301	0.0792084			39.7134		0.000412987	0.00190437	0.0437131	0.0462387	0.00148878		0.000198072	0.00190326	0.00248244
2.7	Line_4_055	11.9303	47.9941	0	0.118625	0.0298459	0.0917669	0.00304357	0.10728	0	0	39.5815	0	0	0.00316909	0.0462034	0.0153916	5.54875e-05	0	0.000106791	0.00228237	0.00177618	0	0.0693802	0	0.00456775	0.000631543		11.9303	47.9941		0.118625	0.0298459	0.0917669	0.00304357	0.10728			39.5815			0.00316909	0.0462034	0.0153916	5.54875e-05		0.000106791	0.00228237	0.00177618
2.75	Line_4_056	11.9173	47.9945	0	0.115035	0.0260536	0.0823742	0.00302354	0.149231	0.01248	0	39.5445	0	0	0.00207989	0.055074	0.0182075	0.000571774	0	0.000333974	0.00334315	0.0016685	0	0.0683854	0	0.00583785	0		11.9173	47.9945		0.115035	0.0260536	0.0823742	0.00302354	0.149231	0.01248		39.5445			0.00207989	0.055074	0.0182075	0.000571774		0.000333974	0.00334315	0.0016685
2.8	Line_4_057	11.9147	47.971	0.0338391	0.099144	0.0287787	0.0663538	0.00232688	0.12349	0.00431945	0	39.5623	0.0501959	0	0	0.0554955	0.0144492	0.00100992	0	0.000108571	0.00374798	0.00124463	0	0.0674457	0	0	0		11.9147	47.971	0.0338391	0.099144	0.0287787	0.0663538	0.00232688	0.12349	0.00431945		39.5623	0.0501959			0.0554955	0.0144492	0.00100992		0.000108571	0.00374798	0.00124463
2.85	Line_4_058	11.9213	47.9583	0	0.0451447	0.0260545	0.0559127	0.00261381	0.111408	0	0	39.6742	0.0578301	0.0017573	0.000852834	0.0556712	0.0115486	0.00297778	0	0.00124267	0.00419833	0.00156574	0	0.0655192	0	0.00156908	0.000378077		11.9213	47.9583		0.0451447	0.0260545	0.0559127	0.00261381	0.111408			39.6742	0.0578301	0.0017573	0.000852834	0.0556712	0.0115486	0.00297778		0.00124267	0.00419833	0.00156574
2.9	Line_4_059	11.9216	47.9857	0	0.124489	0.0289946	0.080931	0.00173451	0.11113	0	0	39.545	0.0496031	0	0.0007287	0.0643494	0.0124779	0.00311299	0	0.000632288	0.00271965	0.00191793	0	0.0639402	0	0	0.000920774		11.9216	47.9857		0.124489	0.0289946	0.080931	0.00173451	0.11113			39.545	0.0496031		0.0007287	0.0643494	0.0124779	0.00311299		0.000632288	0.00271965	0.00191793
2.95	Line_4_060	11.9246	47.9871	0	0.142777	0.0337238	0.0711365	0.00113136	0.11263	0	0	39.5258	0.0352123	0	0.000623182	0.0795114	0.0124232	0.00431987	0.00103271	0.00012629	0.0019675	0.00200367	0	0.0618555	0	0	0.00199287		11.9246	47.9871		0.142777	0.0337238	0.0711365	0.00113136	0.11263			39.5258	0.0352123		0.000623182	0.0795114	0.0124232	0.00431987	0.00103271	0.00012629	0.0019675	0.00200367
3	Line_4_061	11.9302	47.9896	0	0.142137	0.0312543	0.0673028	0.0022627	0.115275	0	0	39.5457	0.00367938	0	0.000943874	0.084242	0.0122838	0.00412099	0.00143767	0	0.00365416	0.00050282	0	0.062042	0	0	0.00337174		11.9302	47.9896		0.142137	0.0312543	0.0673028	0.0022627	0.115275			39.5457	0.00367938		0.000943874	0.084242	0.0122838	0.00412099	0.00143767		0.00365416	0.00050282
3.05	Line_4_062	11.9316	47.9728	0	0.0949766	0.0288891	0.0687764	0.00198013	0.102965	0	0	39.6263	0	0	0.000423858	0.0748029	0.0169512	0.00337504	0.000929003	1.98007e-05	0.00552394	0.000674551	0	0.0661438	0	0	0.00287575		11.9316	47.9728		0.0949766	0.0288891	0.0687764	0.00198013	0.102965			39.6263			0.000423858	0.0748029	0.0169512	0.00337504	0.000929003	1.98007e-05	0.00552394	0.000674551
3.1	Line_4_063	11.932	47.9846	0	0.133612	0.0333496	0.0775066	0.00126324	0.0934197	0	0	39.5629	0.0228218	0.000284304	0	0.0608241	0.019649	0.00200872	0	0.000418594	0.00406714	0.00135547	0	0.0682028	0	0	0.00177043		11.932	47.9846		0.133612	0.0333496	0.0775066	0.00126324	0.0934197			39.5629	0.0228218	0.000284304		0.0608241	0.019649	0.00200872		0.000418594	0.00406714	0.00135547
3.15	Line_4_064	11.9318	47.9724	0	0.104961	0.0299344	0.0663206	0.000950742	0.0907385	0	0	39.6094	0.0397992	0.00174536	0	0.0509119	0.0198172	0.00128452	0	0.00149714	0.00362752	0.00189624	0	0.0683662	0	0.00305821	0.00145098		11.9318	47.9724		0.104961	0.0299344	0.0663206	0.000950742	0.0907385			39.6094	0.0397992	0.00174536		0.0509119	0.0198172	0.00128452		0.00149714	0.00362752	0.00189624
3.2	Line_4_065	11.9293	47.9818	0	0.124918	0.0319683	0.0782527	0.000769939	0.0985106	0	0	39.5678	0.0283769	0.00334039	0.000528486	0.0494143	0.0197877	0.00153942	0	0.00117169	0.00367879	0.00183622	0	0.0689394	0	0.00737406	0.000723349		11.9293	47.9818		0.124918	0.0319683	0.0782527	0.000769939	0.0985106			39.5678	0.0283769	0.00334039	0.000528486	0.0494143	0.0197877	0.00153942		0.00117169	0.00367879	0.00183622
3.25	Line_4_066	11.9264	47.9681	0	0.0505688	0.030267	0.0806772	0.0013185	0.10571	0	0	39.681	0.00961724	0.0015959	0	0.0541486	0.0137619	0.000593671	0	0.000237063	0.00417903	0.00212426	0	0.0683222	0	0.00132939	0		11.9264	47.9681		0.0505688	0.030267	0.0806772	0.0013185	0.10571			39.681	0.00961724	0.0015959		0.0541486	0.0137619	0.000593671		0.000237063	0.00417903	0.00212426
3.3	Line_4_067	11.8949	47.9215	0.188186	0.11282	0.0348663	0.0878365	0.00160509	0.102766	0.0147975	0	39.4736	0.0143153	0	0	0.0681963	0.010357	0.000676989	0	0	0.00415023	0.0021331	0	0.0673399	0	0	0		11.8949	47.9215	0.188186	0.11282	0.0348663	0.0878365	0.00160509	0.102766	0.0147975		39.4736	0.0143153			0.0681963	0.010357	0.000676989			0.00415023	0.0021331
3.35	Line_4_068	11.8895	47.8649	0.16794	0.060693	0.0317069	0.0671319	0.00137973	0.0882151	0.0754038	0.000876269	39.5417	0.0353844	0	0	0.0857595	0.0117361	0.00218226	0.000800669	0	0.00437649	0.00256996	0	0.0674255	0	0	0.000298456		11.8895	47.8649	0.16794	0.060693	0.0317069	0.0671319	0.00137973	0.0882151	0.0754038	0.000876269	39.5417	0.0353844			0.0857595	0.0117361	0.00218226	0.000800669		0.00437649	0.00256996
3.4	Line_4_069	11.802	47.6878	0.629383	0.106075	0.0299557	0.0774786	0.000951218	0.0827689	0.168272	0.0147643	39.1746	0.0464349	0	0.000141267	0.0873857	0.0109382	0.00329016	0.00135995	3.93755e-05	0.00469963	0.00352473	0	0.0677015	0	0	0.000487884		11.802	47.6878	0.629383	0.106075	0.0299557	0.0774786	0.000951218	0.0827689	0.168272	0.0147643	39.1746	0.0464349		0.000141267	0.0873857	0.0109382	0.00329016	0.00135995	3.93755e-05	0.00469963	0.00352473
3.45	Line_4_070	11.8342	47.7385	0.439844	0.0620306	0.0327588	0.0628133	0.00142924	0.0860435	0.164088	0.0102693	39.355	0.0502657	0	0.00032315	0.0721028	0.0100056	0.00348138	0.00126449	0.000706796	0.00301342	0.00361739	0	0.0673462	0	0	0.000868332		11.8342	47.7385	0.439844	0.0620306	0.0327588	0.0628133	0.00142924	0.0860435	0.164088	0.0102693	39.355	0.0502657		0.00032315	0.0721028	0.0100056	0.00348138	0.00126449	0.000706796	0.00301342	0.00361739
3.5	Line_4_071	11.8846	47.8604	0.240598	0.114354	0.027605	0.0684497	0.00126295	0.0920265	0.0936925	0.00346029	39.4362	0.0273085	0	0	0.0577192	0.0109013	0.00178028	0.000991747	0.00198376	0.00149092	0.00248889	0	0.0687742	0	0.00156385	0.00238334		11.8846	47.8604	0.240598	0.114354	0.027605	0.0684497	0.00126295	0.0920265	0.0936925	0.00346029	39.4362	0.0273085			0.0577192	0.0109013	0.00178028	0.000991747	0.00198376	0.00149092	0.00248889
3.55	Line_4_072	11.898	47.9186	0.131267	0.0815985	0.0361341	0.0850044	0.000757835	0.106805	0.0302162	0	39.5352	0.0204605	0	0.000177289	0.0526824	0.010492	0.000158849	0.00135631	0.00239433	0.000410434	0.00328463	0	0.0683861	0	0.0157587	0.000827532		11.898	47.9186	0.131267	0.0815985	0.0361341	0.0850044	0.000757835	0.106805	0.0302162		39.5352	0.0204605		0.000177289	0.0526824	0.010492	0.000158849	0.00135631	0.00239433	0.000410434	0.00328463
3.6	Line_4_073	11.9308	47.9909	0	0.14066	0.0310737	0.0703662	0.000982111	0.11963	0.00235383	0	39.5467	0.00291148	0	0.000962279	0.0486702	0.0114245	0.0011136	0.00103064	0.00106473	0.000594415	0.00377412	0	0.0695217	0	0.0229215	0.00251899		11.9308	47.9909		0.14066	0.0310737	0.0703662	0.000982111	0.11963	0.00235383		39.5467	0.00291148		0.000962279	0.0486702	0.0114245	0.0011136	0.00103064	0.00106473	0.000594415	0.00377412
3.65	Line_4_074	11.9217	48.0034	0	0.121943	0.031052	0.0876583	0.00158697	0.139262	0	0	39.5469	0.00875224	0	0.00180339	0.0434877	0.00890939	0.00218912	0	4.09012e-05	0.000650763	0.00295278	0	0.0697317	0	0.00719849	0.000753897		11.9217	48.0034		0.121943	0.031052	0.0876583	0.00158697	0.139262			39.5469	0.00875224		0.00180339	0.0434877	0.00890939	0.00218912		4.09012e-05	0.000650763	0.00295278
3.7	Line_4_075	11.9096	47.9762	0.075126	0.107885	0.0282559	0.0802279	0.0013717	0.13939	0	0	39.5306	0.0162732	0	0.000469607	0.0478181	0.00923339	0.00212935	0	0	0.00377369	0.00300645	0	0.0684087	0	0.000286005	0		11.9096	47.9762	0.075126	0.107885	0.0282559	0.0802279	0.0013717	0.13939			39.5306	0.0162732		0.000469607	0.0478181	0.00923339	0.00212935			0.00377369	0.00300645
3.75	Line_4_076	11.9265	47.9878	0	0.107293	0.0299978	0.0931203	0.000677672	0.110297	0	0	39.588	0.00664589	0	0.0001816	0.055792	0.013776	0.00127519	0.000504653	0	0.00724013	0.00289852	0	0.0680329	0	0	0		11.9265	47.9878		0.107293	0.0299978	0.0931203	0.000677672	0.110297			39.588	0.00664589		0.0001816	0.055792	0.013776	0.00127519	0.000504653		0.00724013	0.00289852
3.8	Line_4_077	11.9274	47.9686	0	0.0795335	0.0298731	0.0801197	0.00103637	0.0951735	0	0	39.6363	0.0247409	0	0.000392496	0.0556501	0.0175097	0.000984302	0.00025722	0.000194324	0.00899854	0.00309401	0	0.068937	0	0	0.00124905		11.9274	47.9686		0.0795335	0.0298731	0.0801197	0.00103637	0.0951735			39.6363	0.0247409		0.000392496	0.0556501	0.0175097	0.000984302	0.00025722	0.000194324	0.00899854	0.00309401
3.85	Line_4_078	11.9399	47.9767	0	0.127301	0.0339557	0.0771859	0.00142542	0.0769435	0	0	39.5983	0	0	0	0.0462562	0.024175	0.000289207	0	0.000266689	0.00881078	0.00294326	0	0.0711465	0	0.00874986	0.00559303		11.9399	47.9767		0.127301	0.0339557	0.0771859	0.00142542	0.0769435			39.5983				0.0462562	0.024175	0.000289207		0.000266689	0.00881078	0.00294326
3.9	Line_4_079	11.943	47.9736	0	0.114696	0.0287368	0.080117	0.00197219	0.0700242	0	0	39.6294	0	0	0.000246398	0.0343872	0.0199835	0	0.00046137	0.00075985	0.0053923	0.00186184	0	0.0713894	0	0.0174842	0.00643807		11.943	47.9736		0.114696	0.0287368	0.080117	0.00197219	0.0700242			39.6294			0.000246398	0.0343872	0.0199835		0.00046137	0.00075985	0.0053923	0.00186184
3.95	Line_4_080	11.9512	47.96	0	0.0757733	0.034499	0.0847744	0.00186468	0.0376085	0	0	39.7214	0	0	0.000338156	0.0270183	0.00867663	0.000297689	0.00102529	0	0.00222007	0.00144383	0	0.0700413	0	0.0175589	0.00427883		11.9512	47.96		0.0757733	0.034499	0.0847744	0.00186468	0.0376085			39.7214			0.000338156	0.0270183	0.00867663	0.000297689	0.00102529		0.00222007	0.00144383
4	Line_4_081	11.957	47.9652	0	0.0779064	0.0263289	0.0658586	0.00196453	0.0445798	0	0	39.7382	0	0	0.000441801	0.0326737	0.0079383	8.04606e-05	0.00127708	0.000127043	0.00282965	0.000127255	0	0.0677788	0	0.00711926	0.00265622		11.957	47.9652		0.0779064	0.0263289	0.0658586	0.00196453	0.0445798			39.7382			0.000441801	0.0326737	0.0079383	8.04606e-05	0.00127708	0.000127043	0.00282965	0.000127255
4.05	Line_4_082	11.9363	47.9746	0	0.110236	0.0301964	0.0721619	0.00266638	0.0753847	0.00392671	0	39.6165	0.0413773	0	0.000151755	0.0480332	0.0153118	0	0.000565173	0.000517017	0.00394934	0	0	0.066372	0	0	0.00174504		11.9363	47.9746		0.110236	0.0301964	0.0721619	0.00266638	0.0753847	0.00392671		39.6165	0.0413773		0.000151755	0.0480332	0.0153118		0.000565173	0.000517017	0.00394934
4.1	Line_4_083	11.9189	47.9654	0.102285	0.191451	0.0341028	0.0684404	0.00174451	0.085677	0.000114092	0	39.4257	0.0481946	0.00266515	0	0.0613381	0.0223039	0.000350191	0	0.00141275	0.00408354	0.000263291	0	0.0636929	0	0.000138798	0.00174566		11.9189	47.9654	0.102285	0.191451	0.0341028	0.0684404	0.00174451	0.085677	0.000114092		39.4257	0.0481946	0.00266515		0.0613381	0.0223039	0.000350191		0.00141275	0.00408354	0.000263291
4.15	Line_4_084	11.9316	47.9574	0	0.0824035	0.0271219	0.0620466	0.000898181	0.0850564	0	0	39.6485	0.0299778	0.00506411	0	0.071134	0.025721	0.000606853	0	0.00295167	0.00379998	0.00121601	0	0.0624355	0	0.00211723	0		11.9316	47.9574		0.0824035	0.0271219	0.0620466	0.000898181	0.0850564			39.6485	0.0299778	0.00506411		0.071134	0.025721	0.000606853		0.00295167	0.00379998	0.00121601
4.2	Line_4_085	11.9294	47.9756	0	0.131844	0.0380438	0.0728701	0.00120181	0.0957481	0	0	39.5593	0.00687285	0.00704513	0	0.0762066	0.0312016	0.00022813	0	0.00175886	0.00256247	0.00149038	0	0.0637401	0	0.00483215	0		11.9294	47.9756		0.131844	0.0380438	0.0728701	0.00120181	0.0957481			39.5593	0.00687285	0.00704513		0.0762066	0.0312016	0.00022813		0.00175886	0.00256247	0.00149038
4.25	Line_4_086	11.9138	47.9767	0	0.109824	0.0235142	0.0841921	0.000904423	0.139053	0	0	39.5416	0	0.00804732	0	0.0780671	0.0371116	0.00303333	0	0.000992076	0.00349222	0.00239009	0	0.0677272	0	0.0095146	0		11.9138	47.9767		0.109824	0.0235142	0.0841921	0.000904423	0.139053			39.5416		0.00804732		0.0780671	0.0371116	0.00303333		0.000992076	0.00349222	0.00239009
4.3	Line_4_087	11.9098	47.9835	0	0.122559	0.0286092	0.0786024	0.0021232	0.155554	0	0	39.5064	0	0.00744009	0	0.0707729	0.0348581	0.00537964	0	0.0017321	0.00743976	0.00295865	0	0.0697235	0	0.0125684	0		11.9098	47.9835		0.122559	0.0286092	0.0786024	0.0021232	0.155554			39.5064		0.00744009		0.0707729	0.0348581	0.00537964		0.0017321	0.00743976	0.00295865
4.35	Line_4_088	11.9151	47.9831	0	0.139584	0.0297543	0.0884045	0.00218576	0.136069	0.00316773	0	39.4959	0	0.0120918	0	0.0590178	0.0301038	0.00466542	0	0.00136707	0.00857912	0.00255839	0	0.069814	0	0.0166586	0.00182741		11.9151	47.9831		0.139584	0.0297543	0.0884045	0.00218576	0.136069	0.00316773		39.4959		0.0120918		0.0590178	0.0301038	0.00466542		0.00136707	0.00857912	0.00255839
4.4	Line_4_089	11.925	47.9555	0	0.0769608	0.0289413	0.0895164	0.00287691	0.0950698	0.0122014	0	39.6325	0	0.0128526	0	0.0512012	0.0203847	0.00269005	0	0.000632592	0.00739934	0.00220539	0	0.0691553	0	0.013117	0.00176215		11.925	47.9555		0.0769608	0.0289413	0.0895164	0.00287691	0.0950698	0.0122014		39.6325		0.0128526		0.0512012	0.0203847	0.00269005		0.000632592	0.00739934	0.00220539
4.45	Line_4_090	11.9337	47.9616	0.0338625	0.123808	0.0336892	0.0692891	0.00230412	0.0822594	0.0065847	0	39.5845	0	0.00765449	0	0.0536818	0.0161866	0.00189802	0.00107894	0.00255885	0.00541822	0.00216491	0	0.0686064	0	0.00737494	0.00176698		11.9337	47.9616	0.0338625	0.123808	0.0336892	0.0692891	0.00230412	0.0822594	0.0065847		39.5845		0.00765449		0.0536818	0.0161866	0.00189802	0.00107894	0.00255885	0.00541822	0.00216491
4.5	Line_4_091	11.916	47.9772	0	0.104984	0.0283014	0.088614	0.00352962	0.129842	0.0281643	0	39.5562	0.0141553	0	0.00118661	0.0589796	0.0124689	0.00233848	0.00018562	0.00260466	0.00304215	0.00299463	0	0.0690437	0	0	0.000245227		11.916	47.9772		0.104984	0.0283014	0.088614	0.00352962	0.129842	0.0281643		39.5562	0.0141553		0.00118661	0.0589796	0.0124689	0.00233848	0.00018562	0.00260466	0.00304215	0.00299463
4.55	Line_4_092	11.9202	47.9811	0.0132389	0.11861	0.0332379	0.0792056	0.00306434	0.128238	0.00497673	0	39.5477	0	0	0.0019106	0.058485	0.00890514	0.00312867	0.00122365	0.001833	0.00496276	0.00419772	0	0.0696442	0	0.015267	0.000870148		11.9202	47.9811	0.0132389	0.11861	0.0332379	0.0792056	0.00306434	0.128238	0.00497673		39.5477			0.0019106	0.058485	0.00890514	0.00312867	0.00122365	0.001833	0.00496276	0.00419772
4.6	Line_4_093	11.936	47.9595	0	0.0669695	0.0251295	0.0766279	0.00219035	0.0856083	0	0	39.6854	0	0	0.000459876	0.0481264	0.00333249	0.00414508	0.000964524	0.00126084	0.00784499	0.00429197	0	0.0694831	0	0.0201096	0.00253599		11.936	47.9595		0.0669695	0.0251295	0.0766279	0.00219035	0.0856083			39.6854			0.000459876	0.0481264	0.00333249	0.00414508	0.000964524	0.00126084	0.00784499	0.00429197
4.65	Line_4_094	11.9315	47.9748	0	0.0706005	0.0290239	0.0888914	0.00295416	0.0975746	0	0	39.6644	0	0	0.00130852	0.040783	0.00551903	0.00516043	0	3.03149e-05	0.00512256	0.00317662	0	0.0700121	0	0.00804682	0.00107944		11.9315	47.9748		0.0706005	0.0290239	0.0888914	0.00295416	0.0975746			39.6644			0.00130852	0.040783	0.00551903	0.00516043		3.03149e-05	0.00512256	0.00317662
4.7	Line_4_095	11.9245	47.9778	0.0222616	0.0826002	0.0309471	0.0757696	0.00315391	0.11767	0	0	39.6207	0.00420165	0	0.000634885	0.0398002	0.0174979	0.00357847	0	0.000383548	0.00302201	0.00211695	0	0.0712768	0	0.00179757	0.000259344		11.9245	47.9778	0.0222616	0.0826002	0.0309471	0.0757696	0.00315391	0.11767			39.6207	0.00420165		0.000634885	0.0398002	0.0174979	0.00357847		0.000383548	0.00302201	0.00211695
4.75	Line_4_096	11.9133	47.9799	0	0.112374	0.0381985	0.0923215	0.00211294	0.121577	0	0	39.5341	0	0	0.000155712	0.0542218	0.0726362	0.000582369	0	0.00085615	0.0045081	0.00175379	0	0.0711526	0	0.00022996	0		11.9133	47.9799		0.112374	0.0381985	0.0923215	0.00211294	0.121577			39.5341			0.000155712	0.0542218	0.0726362	0.000582369		0.00085615	0.0045081	0.00175379
4.8	Line_4_097	11.9096	47.9466	0	0.0886557	0.0319226	0.0581436	0.00187951	0.117281	0	0	39.5611	0.00216706	0	0.00059221	0.0694278	0.133883	0	0.000102857	0.000575076	0.00574723	0.00137279	0	0.0708563	0	0	3.09683e-05		11.9096	47.9466		0.0886557	0.0319226	0.0581436	0.00187951	0.117281			39.5611	0.00216706		0.00059221	0.0694278	0.133883		0.000102857	0.000575076	0.00574723	0.00137279
4.85	Line_4_098	11.9108	47.9521	0	0.0891212	0.0226703	0.0850596	0.00181591	0.107764	0	0	39.5652	0.00402843	0	0.000295675	0.0660416	0.114641	0	0.00282218	0.000918703	0.00508854	0.00254605	0	0.0690617	0	0	0		11.9108	47.9521		0.0891212	0.0226703	0.0850596	0.00181591	0.107764			39.5652	0.00402843		0.000295675	0.0660416	0.114641		0.00282218	0.000918703	0.00508854	0.00254605
4.9	Line_4_099	11.9227	47.9696	0	0.119766	0.0336408	0.0819524	0.00218538	0.0968975	0	0	39.5549	0	0	0.000283433	0.0651457	0.0749743	0	0.00314318	0.000524491	0.00376673	0.00299216	0	0.0675802	0	0	0		11.9227	47.9696		0.119766	0.0336408	0.0819524	0.00218538	0.0968975			39.5549			0.000283433	0.0651457	0.0749743		0.00314318	0.000524491	0.00376673	0.00299216
4.95	Line_4_100	11.9291	47.9734	0	0.123325	0.0288093	0.0772091	0.00192718	0.095866	0	0	39.5723	0	8.42053e-05	0.00014997	0.0828579	0.0384841	0	0.00426859	7.17143e-06	0.0031473	0.00303916	0	0.0636895	0	0	0.00227312		11.9291	47.9734		0.123325	0.0288093	0.0772091	0.00192718	0.095866			39.5723		8.42053e-05	0.00014997	0.0828579	0.0384841		0.00426859	7.17143e-06	0.0031473	0.00303916
5	Line_4_101	11.9292	47.9793	0	0.134141	0.031274	0.0711602	0.00168328	0.104103	0	0	39.556	0	0	0	0.0921006	0.0279703	0	0.00341356	0.00180809	0.00357861	0.00203157	0	0.0611862	0	0	0.00103349		11.9292	47.9793		0.134141	0.031274	0.0711602	0.00168328	0.104103			39.556				0.0921006	0.0279703		0.00341356	0.00180809	0.00357861	0.00203157
5.05	Line_4_102	11.9261	47.9691	0	0.0897301	0.0286412	0.0659429	0.00163171	0.112536	0	0	39.6179	0.00340122	0	0	0.0839647	0.0237872	0	0.00116332	0.00555891	0.00352569	0.00143507	0	0.0629739	0	0	0.00256675		11.9261	47.9691		0.0897301	0.0286412	0.0659429	0.00163171	0.112536			39.6179	0.00340122			0.0839647	0.0237872		0.00116332	0.00555891	0.00352569	0.00143507
5.1	Line_4_103	11.9351	47.9782	0	0.103554	0.0316742	0.0514587	0.00178265	0.108233	0	0	39.624	0.00764279	0	0.000707505	0.0648248	0.014953	0.000854133	0	0.00515146	0.0022252	0.00146478	0	0.0655922	0	0	0.00251311		11.9351	47.9782		0.103554	0.0316742	0.0514587	0.00178265	0.108233			39.624	0.00764279		0.000707505	0.0648248	0.014953	0.000854133		0.00515146	0.0022252	0.00146478
5.15	Line_4_104	11.9287	47.9614	0	0.0296974	0.0291366	0.0547422	0.00150631	0.117779	0	0	39.7235	0.00638846	0	0	0.0513664	0.0123456	0.00554023	0	0.0050206	0.00133618	0.00182273	0	0.0672583	0	0	0.00244224		11.9287	47.9614		0.0296974	0.0291366	0.0547422	0.00150631	0.117779			39.7235	0.00638846			0.0513664	0.0123456	0.00554023		0.0050206	0.00133618	0.00182273
5.2	Line_4_105	11.8976	48.0143	0	0.132697	0.0301107	0.0756423	0.000417239	0.206711	0	0	39.4509	0.036782	0	7.83671e-05	0.053464	0.0119222	0.0140177	0	0.00493788	0.000484259	0.00255459	0	0.0655609	0	0	0.00181046		11.8976	48.0143		0.132697	0.0301107	0.0756423	0.000417239	0.206711			39.4509	0.036782		7.83671e-05	0.053464	0.0119222	0.0140177		0.00493788	0.000484259	0.00255459
5.25	Line_4_106	11.8281	48.042	0	0.0961833	0.0298143	0.07199	0.000846322	0.377609	0	0	39.2793	0.118713	0	0.000461062	0.0520753	0.00881924	0.0156588	1.5147e-05	0.00878231	0.000193607	0.00217369	0	0.0652073	0	0	0.00211983		11.8281	48.042		0.0961833	0.0298143	0.07199	0.000846322	0.377609			39.2793	0.118713		0.000461062	0.0520753	0.00881924	0.0156588	1.5147e-05	0.00878231	0.000193607	0.00217369
5.3	Line_4_107	11.824	48.0418	0	0.0826337	0.0254564	0.0660077	0.00144841	0.38469	0	0	39.2876	0.147975	0	0.000162558	0.0412087	0.00460163	0.00893496	0.00232836	0.0120034	0	0.00233323	0	0.0662095	0	0	0.000588852		11.824	48.0418		0.0826337	0.0254564	0.0660077	0.00144841	0.38469			39.2876	0.147975		0.000162558	0.0412087	0.00460163	0.00893496	0.00232836	0.0120034		0.00233323
5.35	Line_4_108	11.8853	48.0048	0	0.0869614	0.0336264	0.0774808	0.00196041	0.212691	0.00170489	0	39.4841	0.0821731	0	0	0.0371686	0.00361185	0.00358831	0.00429459	0.0091196	0.000573821	0.00235445	0	0.0681966	0	0	0.000272847		11.8853	48.0048		0.0869614	0.0336264	0.0774808	0.00196041	0.212691	0.00170489		39.4841	0.0821731			0.0371686	0.00361185	0.00358831	0.00429459	0.0091196	0.000573821	0.00235445
5.4	Line_4_109	11.9149	47.9514	0.0288162	0.0916783	0.0371124	0.0881819	0.00170368	0.0901691	0.0370072	0.000103174	39.5751	0.0626383	0	0.000492199	0.0350479	0.00537177	0.000149241	0.00325786	0.00500309	0.00127691	0.00239653	0	0.0681306	0	0	0		11.9149	47.9514	0.0288162	0.0916783	0.0371124	0.0881819	0.00170368	0.0901691	0.0370072	0.000103174	39.5751	0.0626383		0.000492199	0.0350479	0.00537177	0.000149241	0.00325786	0.00500309	0.00127691	0.00239653
5.45	Line_4_110	11.9027	47.8757	0.129554	0.070107	0.0281931	0.0754345	0.00129286	0.0736097	0.0982004	0.0254216	39.5706	0.0332267	0	0	0.0356814	0.00902853	0.000359789	0	0	0.00219315	0.00200845	0	0.0667128	0	0	0		11.9027	47.8757	0.129554	0.070107	0.0281931	0.0754345	0.00129286	0.0736097	0.0982004	0.0254216	39.5706	0.0332267			0.0356814	0.00902853	0.000359789			0.00219315	0.00200845
5.5	Line_4_111	11.8784	47.8308	0.272596	0.0858498	0.0249633	0.0717839	0.00257663	0.0855938	0.111576	0.030626	39.4643	0.0118624	0	0	0.0416841	0.0114485	0.00516085	0	0.000771232	0.00341596	0.00154358	0	0.0649599	0	0	4.1613e-05		11.8784	47.8308	0.272596	0.0858498	0.0249633	0.0717839	0.00257663	0.0855938	0.111576	0.030626	39.4643	0.0118624			0.0416841	0.0114485	0.00516085		0.000771232	0.00341596	0.00154358
5.55	Line_4_112	11.9251	47.9149	0.0256679	0.0209561	0.029271	0.0399713	0.00189512	0.100357	0.0580303	0.0105333	39.7274	0.0074845	0.00296535	7.87138e-05	0.0483744	0.0104963	0.00538705	0	0.00166205	0.00339899	0.00173587	0	0.0640753	0	0	0.000251024		11.9251	47.9149	0.0256679	0.0209561	0.029271	0.0399713	0.00189512	0.100357	0.0580303	0.0105333	39.7274	0.0074845	0.00296535	7.87138e-05	0.0483744	0.0104963	0.00538705		0.00166205	0.00339899	0.00173587
5.6	Line_4_113	11.94	47.9863	0	0.139128	0.03093	0.0600906	0.00201277	0.100903	0.00932834	0	39.5828	0	0.00445675	0	0.0506647	0.0144978	0.00517725	0	0.00138745	0.00242042	0.00206783	0	0.0628116	0	0.00461257	0.000420563		11.94	47.9863		0.139128	0.03093	0.0600906	0.00201277	0.100903	0.00932834		39.5828		0.00445675		0.0506647	0.0144978	0.00517725		0.00138745	0.00242042	0.00206783
5.65	Line_4_114	11.9487	47.981	0	0.100974	0.0326302	0.0569836	0.00198582	0.0780212	0	0	39.6752	0	0.000409646	0	0.0421347	0.0131563	0.00219564	0	3.90071e-05	0.00248616	0.00169375	0	0.0620331	0	8.551e-05	0.000332425		11.9487	47.981		0.100974	0.0326302	0.0569836	0.00198582	0.0780212			39.6752		0.000409646		0.0421347	0.0131563	0.00219564		3.90071e-05	0.00248616	0.00169375
5.7	Line_4_115	11.94	47.9918	0	0.12137	0.0365576	0.0761642	0.00103119	0.0926525	0	0	39.6125	0	0.000262465	0.000892589	0.0373427	0.0107165	0.00180062	0	0.000688807	0.00501499	0.00245632	0	0.0623887	0	0.00542052	0.000936686		11.94	47.9918		0.12137	0.0365576	0.0761642	0.00103119	0.0926525			39.6125		0.000262465	0.000892589	0.0373427	0.0107165	0.00180062		0.000688807	0.00501499	0.00245632
5.75	Line_4_116	11.9152	47.9943	0.0507653	0.161477	0.0358726	0.0975889	0.0012994	0.134577	0.0134757	0	39.4627	0	0.00294542	0.000593488	0.0318712	0.00617134	0.00505582	0	0.00183855	0.00734187	0.00358173	0	0.0639167	0	0.0073502	0.00214804		11.9152	47.9943	0.0507653	0.161477	0.0358726	0.0975889	0.0012994	0.134577	0.0134757		39.4627		0.00294542	0.000593488	0.0318712	0.00617134	0.00505582		0.00183855	0.00734187	0.00358173
5.8	Line_4_117	11.9201	47.9557	0.0688885	0.0795259	0.0304618	0.095419	0.00095405	0.0979836	0	0	39.6137	0	0.00525485	0.00109977	0.0247691	0.00282189	0.00619933	0	0.00172835	0.00790342	0.00474872	0	0.0653267	0	0.0135416	0.00385292		11.9201	47.9557	0.0688885	0.0795259	0.0304618	0.095419	0.00095405	0.0979836			39.6137		0.00525485	0.00109977	0.0247691	0.00282189	0.00619933		0.00172835	0.00790342	0.00474872
5.85	Line_4_118	11.9566	47.9777	0	0.124972	0.0329331	0.0701895	0.000334314	0.0516976	0	0	39.6601	0	0.00102322	0	0.0175364	0.00172329	0.00701341	0	0.00275629	0.00511382	0.00293862	0	0.0664213	0	0.0164121	0.00459661		11.9566	47.9777		0.124972	0.0329331	0.0701895	0.000334314	0.0516976			39.6601		0.00102322		0.0175364	0.00172329	0.00701341		0.00275629	0.00511382	0.00293862
5.9	Line_4_119	11.9464	47.9793	0	0.0871539	0.0359183	0.080145	0.0010941	0.0705447	0	0	39.6881	0	0	0.000391265	0.0151767	0.00546466	0.00714843	0.00027768	0.00293007	0.00206955	0.00141248	0	0.0671848	0	0.00564259	0.00357144		11.9464	47.9793		0.0871539	0.0359183	0.080145	0.0010941	0.0705447			39.6881			0.000391265	0.0151767	0.00546466	0.00714843	0.00027768	0.00293007	0.00206955	0.00141248
5.95	Line_4_120	11.9304	47.9912	0.0128785	0.0885165	0.0369931	0.0719947	0.00208225	0.120885	0	0	39.6325	0.000199476	0	0.000589887	0.0221856	0.0089798	0.00570819	0.000677595	0.00125583	0.00251896	0.00036154	0	0.0669505	0	0	0.0030951		11.9304	47.9912	0.0128785	0.0885165	0.0369931	0.0719947	0.00208225	0.120885			39.6325	0.000199476		0.000589887	0.0221856	0.0089798	0.00570819	0.000677595	0.00125583	0.00251896	0.00036154
6	Line_4_121	11.9234	47.9777	0	0.0417857	0.0294645	0.0625756	0.0027225	0.141779	0.0102995	0	39.6857	0.000104502	0	0.000835325	0.0338543	0.0119319	0.00428634	0.000105751	0.000174462	0.0032782	0.000389453	0	0.0678721	0	0	0.00170606		11.9234	47.9777		0.0417857	0.0294645	0.0625756	0.0027225	0.141779	0.0102995		39.6857	0.000104502		0.000835325	0.0338543	0.0119319	0.00428634	0.000105751	0.000174462	0.0032782	0.000389453
6.05	Line_4_122	11.9251	47.9799	0	0.0467952	0.0283101	0.0816185	0.0027085	0.123896	0.000904003	0	39.6837	0	0	0.00171345	0.0397922	0.0107941	0.00275185	0	0.000360473	0.00296418	0.00117393	0	0.066722	0	0	0.000881151		11.9251	47.9799		0.0467952	0.0283101	0.0816185	0.0027085	0.123896	0.000904003		39.6837			0.00171345	0.0397922	0.0107941	0.00275185		0.000360473	0.00296418	0.00117393
6.1	Line_5_01	11.911	47.9621	0.0881097	0.0746767	0.035024	0.0888274	0.00224487	0.120215	0	0	39.5904	0	0	0.0014666	0.0390591	0.0104895	0.00257782	0	0.000567437	0.00300839	0.000909341	0	0.0674772	0	0	0.00179741		11.911	47.9621	0.0881097	0.0746767	0.035024	0.0888274	0.00224487	0.120215			39.5904			0.0014666	0.0390591	0.0104895	0.00257782		0.000567437	0.00300839	0.000909341
6.15	Line_5_02	11.9392	47.9959	0	0.129373	0.034676	0.0841356	0.00209722	0.0917604	0.00184621	0	39.595	0	0	0.00194434	0.0413421	0.00949605	0.00166294	0	0.000768037	0.00215919	0.00157794	0	0.0662151	0	0.000215062	0.00058121		11.9392	47.9959		0.129373	0.034676	0.0841356	0.00209722	0.0917604	0.00184621		39.595			0.00194434	0.0413421	0.00949605	0.00166294		0.000768037	0.00215919	0.00157794
6.2	Line_5_03	11.9332	47.9742	0	0.0688764	0.0328853	0.0993274	0.00252509	0.0804764	0.00268797	0	39.6745	0.00420131	0	0.00217972	0.0412983	0.00934993	0.000102015	0	0.00173721	0.00174537	0.00193645	0	0.0661331	0	0.0023746	0.000245975		11.9332	47.9742		0.0688764	0.0328853	0.0993274	0.00252509	0.0804764	0.00268797		39.6745	0.00420131		0.00217972	0.0412983	0.00934993	0.000102015		0.00173721	0.00174537	0.00193645
6.25	Line_5_04	11.9239	47.9666	0.0473738	0.114441	0.0297799	0.0939614	0.00167269	0.0773746	0.00270832	0	39.5683	0.0418056	0	0.00279514	0.04298	0.0128174	0	0.00184604	0.00186551	0.00115507	0.00205604	0	0.0665508	0	0	0		11.9239	47.9666	0.0473738	0.114441	0.0297799	0.0939614	0.00167269	0.0773746	0.00270832		39.5683	0.0418056		0.00279514	0.04298	0.0128174		0.00184604	0.00186551	0.00115507	0.00205604
6.3	Line_5_05	11.9147	47.971	0.0263308	0.118342	0.0310399	0.11377	0.00234125	0.0789041	0.00228514	0	39.5311	0.0704132	0.000519176	0.0016178	0.0455372	0.0173239	0	0.00296994	0.00106593	0.00157239	0.00181251	0	0.0667697	0	0.000504631	0		11.9147	47.971	0.0263308	0.118342	0.0310399	0.11377	0.00234125	0.0789041	0.00228514		39.5311	0.0704132	0.000519176	0.0016178	0.0455372	0.0173239		0.00296994	0.00106593	0.00157239	0.00181251
6.35	Line_5_06	11.9285	47.9818	0	0.117204	0.0321611	0.0943082	0.00198984	0.0839035	0	0	39.5784	0.0437197	0.00348391	0.00158387	0.0412559	0.0123125	0	0.00147045	0.000239803	0.00376924	0.00217832	0	0.0677557	0	0.00398738	0		11.9285	47.9818		0.117204	0.0321611	0.0943082	0.00198984	0.0839035			39.5784	0.0437197	0.00348391	0.00158387	0.0412559	0.0123125		0.00147045	0.000239803	0.00376924	0.00217832
6.4	Line_5_07	11.9341	47.9506	0	0.0452589	0.0266593	0.0738534	0.00222429	0.0690986	0	0	39.7156	0.0413461	0.00480827	0.0029847	0.0329881	0.00871728	0.000563007	0	0.000516694	0.00602119	0.00322961	0	0.0682689	0	0.0127627	0.000394991		11.9341	47.9506		0.0452589	0.0266593	0.0738534	0.00222429	0.0690986			39.7156	0.0413461	0.00480827	0.0029847	0.0329881	0.00871728	0.000563007		0.000516694	0.00602119	0.00322961
6.45	Line_5_08	11.933	47.9572	0.0011928	0.0687828	0.0342313	0.0846841	0.00239136	0.0585515	0.00094455	0	39.6731	0.0525872	0.00181026	0.00377045	0.0266698	0.0116356	0.00244755	0	0.00101063	0.00754667	0.0027102	0	0.0686262	0	0.00585659	0.00125413		11.933	47.9572	0.0011928	0.0687828	0.0342313	0.0846841	0.00239136	0.0585515	0.00094455		39.6731	0.0525872	0.00181026	0.00377045	0.0266698	0.0116356	0.00244755		0.00101063	0.00754667	0.0027102
6.5	Line_5_09	11.9364	47.9333	0	0	0.026295	0.0740127	0.00125727	0.0465542	0	0	39.7982	0.0520965	0	0.00200365	0.0279701	0.0193025	0.00248355	0	0.000363482	0.00634224	0.0024954	0	0.0677222	0	0.00177811	0.00142083		11.9364	47.9333			0.026295	0.0740127	0.00125727	0.0465542			39.7982	0.0520965		0.00200365	0.0279701	0.0193025	0.00248355		0.000363482	0.00634224	0.0024954
6.55	Line_5_10	11.9556	47.967	0	0.108018	0.0296083	0.0556574	0.00161747	0.0465733	0	0	39.6844	0.00798849	0	0.000569588	0.0362147	0.0240916	0.00208839	0	0.000249039	0.00635989	0.00267389	0	0.0671126	0	0.00339433	0.000658294		11.9556	47.967		0.108018	0.0296083	0.0556574	0.00161747	0.0465733			39.6844	0.00798849		0.000569588	0.0362147	0.0240916	0.00208839		0.000249039	0.00635989	0.00267389
6.6	Line_5_11	11.9418	47.9545	0	0.046216	0.0353621	0.0690598	0.00166559	0.0632494	0	0	39.7405	0	0	0.00110711	0.0445908	0.0247249	0.000376323	0	0	0.00622153	0.00217865	0	0.0664367	0	0.00182045	0.00015969		11.9418	47.9545		0.046216	0.0353621	0.0690598	0.00166559	0.0632494			39.7405			0.00110711	0.0445908	0.0247249	0.000376323			0.00622153	0.00217865
6.65	Line_5_12	11.9332	47.9875	0	0.113426	0.0311973	0.066086	0.00266236	0.110164	0	0	39.6016	0	0	0.00544001	0.0489939	0.0242044	0.000640414	0.000891652	0	0.00471513	0.0021195	0	0.0650447	0	0.00128311	0.000770066		11.9332	47.9875		0.113426	0.0311973	0.066086	0.00266236	0.110164			39.6016			0.00544001	0.0489939	0.0242044	0.000640414	0.000891652		0.00471513	0.0021195
6.7	Line_5_13	11.8707	47.9345	0.0860924	0.038394	0.0320931	0.105501	0.0047909	0.185655	0.0563353	0.00207186	39.5174	0	0	0.00853257	0.058688	0.0262089	0.0014362	0.000638931	0.000346218	0.00404528	0.00137298	0	0.0638476	0	0.00134282	0		11.8707	47.9345	0.0860924	0.038394	0.0320931	0.105501	0.0047909	0.185655	0.0563353	0.00207186	39.5174			0.00853257	0.058688	0.0262089	0.0014362	0.000638931	0.000346218	0.00404528	0.00137298
6.75	Line_5_14	11.873	47.9452	0.0192601	0.0349187	0.0273355	0.122491	0.00601596	0.190186	0.0719876	0.00111928	39.5312	0	0	0.00853045	0.0658639	0.0230687	0.00363082	0.00146682	0.000857269	0.00450193	0.00208012	0	0.0631251	0	0.00414465	0		11.873	47.9452	0.0192601	0.0349187	0.0273355	0.122491	0.00601596	0.190186	0.0719876	0.00111928	39.5312			0.00853045	0.0658639	0.0230687	0.00363082	0.00146682	0.000857269	0.00450193	0.00208012
6.8	Line_5_15	11.8728	47.9589	0.0305474	0.0872208	0.0274336	0.134284	0.00432261	0.165229	0.0495061	0	39.4452	0.0602344	0	0.00529445	0.0661014	0.0205059	0.00471086	0.000114714	0.000631103	0.00414151	0.00172244	0	0.0610467	0	0	0		11.8728	47.9589	0.0305474	0.0872208	0.0274336	0.134284	0.00432261	0.165229	0.0495061		39.4452	0.0602344		0.00529445	0.0661014	0.0205059	0.00471086	0.000114714	0.000631103	0.00414151	0.00172244
6.85	Line_5_16	11.8651	47.9651	0	0.0629407	0.0339852	0.171051	0.00369207	0.159887	0.0426674	0	39.4597	0.0749767	0	0.00249959	0.0663286	0.021169	0.00457987	0	1.04474e-05	0.00360468	0.00159555	0	0.0605969	0	0	0.000478895		11.8651	47.9651		0.0629407	0.0339852	0.171051	0.00369207	0.159887	0.0426674		39.4597	0.0749767		0.00249959	0.0663286	0.021169	0.00457987		1.04474e-05	0.00360468	0.00159555
6.9	Line_5_17	11.8871	47.9781	0	0.0952964	0.0271781	0.158675	0.00315002	0.147159	0.0394495	0	39.4796	0.0241831	0	0.00347515	0.0576889	0.0224373	0.0027783	0	0	0.00290818	0.00221695	0	0.0607234	0	0.00723637	0.000678089		11.8871	47.9781		0.0952964	0.0271781	0.158675	0.00315002	0.147159	0.0394495		39.4796	0.0241831		0.00347515	0.0576889	0.0224373	0.0027783			0.00290818	0.00221695
6.95	Line_5_18	11.9085	47.9642	0	0.0708556	0.0296242	0.143041	0.00309739	0.10353	0.0178432	0	39.59	0	0	0.00304959	0.0435323	0.0203462	0.0010321	0.000247631	0	0.00261242	0.0016369	0	0.0635023	0	0.0334635	0		11.9085	47.9642		0.0708556	0.0296242	0.143041	0.00309739	0.10353	0.0178432		39.59			0.00304959	0.0435323	0.0203462	0.0010321	0.000247631		0.00261242	0.0016369
7	Line_5_19	11.9284	47.9597	0	0.0929489	0.0368096	0.123342	0.00179141	0.0613202	0	0	39.6184	0	0	0.00263093	0.0311432	0.0158608	3.71237e-05	0	0	0.00268322	0.00234491	0	0.0671592	0	0.0553533	0		11.9284	47.9597		0.0929489	0.0368096	0.123342	0.00179141	0.0613202			39.6184			0.00263093	0.0311432	0.0158608	3.71237e-05			0.00268322	0.00234491
7.05	Line_5_20	11.9465	47.9341	0.024153	0.076505	0.0259276	0.072043	0.00164497	0.038108	0.00507447	0	39.7045	0	0	0.00269156	0.0180455	0.0150086	6.67167e-05	0.000927425	0.00211906	0.00433541	0.00341593	0	0.0703848	0	0.0544665	0		11.9465	47.9341	0.024153	0.076505	0.0259276	0.072043	0.00164497	0.038108	0.00507447		39.7045			0.00269156	0.0180455	0.0150086	6.67167e-05	0.000927425	0.00211906	0.00433541	0.00341593
7.1	Line_5_21	11.9489	47.9476	0	0.0732094	0.0276246	0.065373	0.00278671	0.0517245	0.0239135	0	39.7186	0	0	0.00290267	0.0172139	0.0151081	5.14876e-05	0.0002841	0.00213181	0.00635762	0.00418683	0	0.0689346	0	0.0231347	0		11.9489	47.9476		0.0732094	0.0276246	0.065373	0.00278671	0.0517245	0.0239135		39.7186			0.00290267	0.0172139	0.0151081	5.14876e-05	0.0002841	0.00213181	0.00635762	0.00418683
7.15	Line_5_22	11.9414	47.9594	0	0.0519857	0.0338489	0.0855147	0.00235553	0.0611206	0.00787885	0	39.7288	0	0	0.00102975	0.0264518	0.0157451	0	0	0.000276143	0.00653358	0.00284607	0	0.068244	0	0.00617834	0.000401054		11.9414	47.9594		0.0519857	0.0338489	0.0855147	0.00235553	0.0611206	0.00787885		39.7288			0.00102975	0.0264518	0.0157451			0.000276143	0.00653358	0.00284607
7.2	Line_5_23	11.9419	47.9606	0.0226731	0.090789	0.0328343	0.0675891	0.00262439	0.0643933	0.00469239	0	39.6675	0	0	0.00146383	0.035873	0.0253884	0	0	0.000427048	0.00895199	0.0016141	0	0.066178	0	0	0.00445515		11.9419	47.9606	0.0226731	0.090789	0.0328343	0.0675891	0.00262439	0.0643933	0.00469239		39.6675			0.00146383	0.035873	0.0253884			0.000427048	0.00895199	0.0016141
7.25	Line_5_24	11.9339	47.9742	0.00732458	0.116964	0.0410224	0.0784339	0.00237709	0.0808565	0.0103352	0	39.5971	0.0101443	0	0.000690162	0.0352915	0.025921	0	2.17102e-05	0.000284893	0.0100188	0.000768918	0	0.0675056	0	0	0.00681538		11.9339	47.9742	0.00732458	0.116964	0.0410224	0.0784339	0.00237709	0.0808565	0.0103352		39.5971	0.0101443		0.000690162	0.0352915	0.025921		2.17102e-05	0.000284893	0.0100188	0.000768918
7.3	Line_5_25	11.9406	47.9827	0.00135738	0.12206	0.0323712	0.0635584	0.00267312	0.093625	0.010701	0	39.6106	1.35265e-05	0.00058126	0.000986035	0.0310518	0.0190295	0.00068427	0.00101035	9.59882e-05	0.00815953	0.00179393	0	0.068183	0	0.000464003	0.00766902		11.9406	47.9827	0.00135738	0.12206	0.0323712	0.0635584	0.00267312	0.093625	0.010701		39.6106	1.35265e-05	0.00058126	0.000986035	0.0310518	0.0190295	0.00068427	0.00101035	9.59882e-05	0.00815953	0.00179393
7.35	Line_5_26	11.9184	47.9671	0	0.082271	0.0401256	0.0900951	0.00365989	0.119994	0.0406359	0	39.6016	0	0.00330274	0.000670029	0.0260826	0.0119071	0.00159682	0.00182024	0.000124088	0.00504698	0.00167741	0	0.0693317	0	0.00932494	0.00525106		11.9184	47.9671		0.082271	0.0401256	0.0900951	0.00365989	0.119994	0.0406359		39.6016		0.00330274	0.000670029	0.0260826	0.0119071	0.00159682	0.00182024	0.000124088	0.00504698	0.00167741
7.4	Line_5_27	11.9123	47.9704	0	0.0554221	0.0345739	0.0704355	0.00317048	0.154111	0.0328919	0	39.6256	0.00519725	0.00177663	0	0.0344951	0.0106873	0.00111241	0.00179755	0.000292675	0.0043849	0.00118596	0	0.0691045	0	0.00897207	0.00210927		11.9123	47.9704		0.0554221	0.0345739	0.0704355	0.00317048	0.154111	0.0328919		39.6256	0.00519725	0.00177663		0.0344951	0.0106873	0.00111241	0.00179755	0.000292675	0.0043849	0.00118596
7.45	Line_5_28	11.9081	48.0183	0	0.153587	0.0304385	0.0755734	0.000974775	0.176215	0	0	39.4509	0.0461282	0.000269104	0	0.0497081	0.014797	0.00108033	0	0.000871364	0.00506605	0.00116782	0	0.0668109	0	0	0		11.9081	48.0183		0.153587	0.0304385	0.0755734	0.000974775	0.176215			39.4509	0.0461282	0.000269104		0.0497081	0.014797	0.00108033		0.000871364	0.00506605	0.00116782
7.5	Line_5_29	11.9045	47.9887	0.026932	0.134842	0.0285951	0.0787862	0.000689449	0.139009	0	0	39.4701	0.0912662	0	0	0.0510654	0.013034	0.000782377	0	0.000831667	0.0037905	0.00111429	0	0.0659558	0	0	0		11.9045	47.9887	0.026932	0.134842	0.0285951	0.0787862	0.000689449	0.139009			39.4701	0.0912662			0.0510654	0.013034	0.000782377		0.000831667	0.0037905	0.00111429
7.55	Line_5_30	11.9052	47.9788	0	0.0934639	0.0306586	0.0937959	0.00144767	0.116303	0	0	39.5408	0.111686	0	0	0.0448167	0.0111205	0.000823469	0	0.00115862	0.00272332	0.0014704	0	0.0657242	0	0	0		11.9052	47.9788		0.0934639	0.0306586	0.0937959	0.00144767	0.116303			39.5408	0.111686			0.0448167	0.0111205	0.000823469		0.00115862	0.00272332	0.0014704
7.6	Line_5_31	11.9103	47.9449	0.0992803	0.0972207	0.0267071	0.066056	0.00150275	0.0912627	0	0	39.5517	0.092678	0	0.000570205	0.0367021	0.00709882	0.0011109	0	0.0018475	0.002828	0.00231119	0	0.0658029	0	0	0		11.9103	47.9449	0.0992803	0.0972207	0.0267071	0.066056	0.00150275	0.0912627			39.5517	0.092678		0.000570205	0.0367021	0.00709882	0.0011109		0.0018475	0.002828	0.00231119
7.65	Line_5_32	11.9259	47.9949	0	0.133674	0.0399723	0.0854093	0.00230404	0.0981158	0	0	39.5434	0.0586005	0	0.00375198	0.0342899	0.00475422	0.00131371	0	0.00121482	0.00393173	0.00185832	0	0.0659705	0	0.000629791	7.68246e-05		11.9259	47.9949		0.133674	0.0399723	0.0854093	0.00230404	0.0981158			39.5434	0.0586005		0.00375198	0.0342899	0.00475422	0.00131371		0.00121482	0.00393173	0.00185832
7.7	Line_5_33	11.9363	47.9738	0	0.0918713	0.0263208	0.0672465	0.00173618	0.0887702	0	0	39.6475	0.0298722	0	0.00342507	0.0396144	0.00788189	0.00288814	0	0.00122507	0.00513868	0.00236561	0	0.0653763	0	0.00816281	0.000459148		11.9363	47.9738		0.0918713	0.0263208	0.0672465	0.00173618	0.0887702			39.6475	0.0298722		0.00342507	0.0396144	0.00788189	0.00288814		0.00122507	0.00513868	0.00236561
7.75	Line_5_34	11.946	47.9522	0.0280272	0.118402	0.025893	0.0619751	0.000950829	0.0544907	0	0	39.6368	0	0	0.00235208	0.0517356	0.0141891	0.00246697	0	0.00146223	0.00641242	0.00257497	0	0.0636513	0	0.0285147	0.00190485		11.946	47.9522	0.0280272	0.118402	0.025893	0.0619751	0.000950829	0.0544907			39.6368			0.00235208	0.0517356	0.0141891	0.00246697		0.00146223	0.00641242	0.00257497
7.8	Line_5_35	11.9516	47.9384	0	0.0985387	0.0308843	0.059958	0.000765211	0.0333587	0	0	39.6891	0	0	0.00282658	0.0508928	0.0156787	0.00394786	0	0.00206649	0.00918139	0.0031305	0	0.0619954	0	0.0429111	0.00477817		11.9516	47.9384		0.0985387	0.0308843	0.059958	0.000765211	0.0333587			39.6891			0.00282658	0.0508928	0.0156787	0.00394786		0.00206649	0.00918139	0.0031305
7.85	Line_5_36	11.9441	47.9292	0	0.0688127	0.0255965	0.0763074	0.000648601	0.0384896	0	0	39.7129	0	0	0.00301905	0.0422861	0.0148906	0.00411485	0	0.00163068	0.0117307	0.00200814	0	0.0621673	0	0.0555841	0.00649713		11.9441	47.9292		0.0688127	0.0255965	0.0763074	0.000648601	0.0384896			39.7129			0.00301905	0.0422861	0.0148906	0.00411485		0.00163068	0.0117307	0.00200814
7.9	Line_5_37	11.9432	47.9575	0	0.100874	0.030867	0.051496	0.00170846	0.078414	0	0	39.656	0	0	0.00364504	0.0315575	0.0113113	0.00200394	0	5.16007e-05	0.0105755	0.00117325	0	0.0646114	0	0.0480307	0.00693801		11.9432	47.9575		0.100874	0.030867	0.051496	0.00170846	0.078414			39.656			0.00364504	0.0315575	0.0113113	0.00200394		5.16007e-05	0.0105755	0.00117325
7.95	Line_5_38	11.9209	47.98	0	0.116767	0.0351664	0.0662469	0.00294874	0.138754	0.0226259	0	39.5544	0	0	0.00243667	0.0354157	0.0156209	0.00359868	0.000480983	0.00101588	0.0095633	0.00131415	0	0.0664221	0	0.0203756	0.00596742		11.9209	47.98		0.116767	0.0351664	0.0662469	0.00294874	0.138754	0.0226259		39.5544			0.00243667	0.0354157	0.0156209	0.00359868	0.000480983	0.00101588	0.0095633	0.00131415
8	Line_5_39	11.8553	47.9003	0.0590541	0.0685907	0.0325326	0.075903	0.00862079	0.228958	0.16938	0.018742	39.4151	0	0	0.00608552	0.0440181	0.0272086	0.00069272	0	0.00110952	0.00583328	0.001181	0	0.0665397	0	0.0120783	0.00269911		11.8553	47.9003	0.0590541	0.0685907	0.0325326	0.075903	0.00862079	0.228958	0.16938	0.018742	39.4151			0.00608552	0.0440181	0.0272086	0.00069272		0.00110952	0.00583328	0.001181
8.05	Line_5_40	11.7511	47.7296	0.194135	0.0616103	0.0310236	0.106619	0.0146859	0.321455	0.468407	0.0466974	39.0785	0	0	0.0151927	0.0493956	0.0461299	0	0.00118664	0.00404051	0.00192172	0.000840827	0	0.0670517	0	0.00869549	0.00165678		11.7511	47.7296	0.194135	0.0616103	0.0310236	0.106619	0.0146859	0.321455	0.468407	0.0466974	39.0785			0.0151927	0.0493956	0.0461299		0.00118664	0.00404051	0.00192172	0.000840827
8.1	Line_5_41	11.7648	47.7495	0.0924599	0.0506494	0.0350319	0.103986	0.0139799	0.316603	0.469607	0.0472002	39.1426	0	0	0.0160393	0.0517692	0.0631372	0	0.00184731	0.00503156	0.000719829	0.00106941	0	0.0665296	0	0.00550077	0.00195741		11.7648	47.7495	0.0924599	0.0506494	0.0350319	0.103986	0.0139799	0.316603	0.469607	0.0472002	39.1426			0.0160393	0.0517692	0.0631372		0.00184731	0.00503156	0.000719829	0.00106941
8.15	Line_5_42	11.8463	47.8893	0.06093	0.149824	0.031061	0.0869245	0.00782048	0.223085	0.206929	0.0315777	39.2513	0	0.00258512	0.00677572	0.0502012	0.0726897	3.1353e-06	0.00121037	0.00308997	0.000357002	0.00134389	0	0.0654525	0	0.00899269	0.00228065		11.8463	47.8893	0.06093	0.149824	0.031061	0.0869245	0.00782048	0.223085	0.206929	0.0315777	39.2513		0.00258512	0.00677572	0.0502012	0.0726897	3.1353e-06	0.00121037	0.00308997	0.000357002	0.00134389
8.2	Line_5_43	11.8946	47.8688	0.128281	0.0788725	0.0260846	0.0543107	0.00293513	0.0994334	0.0472583	0.0332482	39.5297	0	0.0102237	0	0.0516744	0.060839	8.06706e-05	0	0.00074252	0.000891421	0.0017835	0	0.0650109	0	0.0442608	0.000976876		11.8946	47.8688	0.128281	0.0788725	0.0260846	0.0543107	0.00293513	0.0994334	0.0472583	0.0332482	39.5297		0.0102237		0.0516744	0.060839	8.06706e-05		0.00074252	0.000891421	0.0017835
8.25	Line_5_44	11.9263	47.8947	0.0200412	0.078589	0.0334489	0.0626644	0.00159245	0.0503391	0.00385803	0.0299685	39.6363	0	0.00273164	0	0.0442508	0.0413174	0.00109419	0.000147758	0.00105148	0.00188551	0.00198721	0	0.0645797	0	0.102661	0.000422796		11.9263	47.8947	0.0200412	0.078589	0.0334489	0.0626644	0.00159245	0.0503391	0.00385803	0.0299685	39.6363		0.00273164		0.0442508	0.0413174	0.00109419	0.000147758	0.00105148	0.00188551	0.00198721
8.3	Line_5_45	11.9344	47.9337	0	0.132078	0.0411693	0.0822521	0.000975575	0.0488841	0	0.00558204	39.5744	0	0	0	0.0368283	0.0263105	0.00151519	0.000980302	0.000517064	0.00155397	0.00194695	0	0.0660954	0	0.110738	0		11.9344	47.9337		0.132078	0.0411693	0.0822521	0.000975575	0.0488841		0.00558204	39.5744				0.0368283	0.0263105	0.00151519	0.000980302	0.000517064	0.00155397	0.00194695
8.35	Line_5_46	11.9318	47.9409	0	0.140236	0.0279593	0.0597136	0.00117442	0.0458813	0.00234866	0	39.5511	0.105113	0	0	0.0310216	0.0193763	0.00310291	0.000466219	0.000408384	0.00253795	0.00207815	0	0.0684566	0	0.0662869	0		11.9318	47.9409		0.140236	0.0279593	0.0597136	0.00117442	0.0458813	0.00234866		39.5511	0.105113			0.0310216	0.0193763	0.00310291	0.000466219	0.000408384	0.00253795	0.00207815
8.4	Line_5_47	11.927	47.947	0	0.0981745	0.0348962	0.0751504	0.00182433	0.0565592	0.012897	0	39.604	0.0950304	0.000249058	0	0.0272471	0.0126523	0.00740034	0.000479661	0.000406128	0.00453652	0.00242832	0	0.0696822	0	0.0223993	0		11.927	47.947		0.0981745	0.0348962	0.0751504	0.00182433	0.0565592	0.012897		39.604	0.0950304	0.000249058		0.0272471	0.0126523	0.00740034	0.000479661	0.000406128	0.00453652	0.00242832
8.45	Line_5_48	11.9348	47.9482	0	0.078442	0.0310174	0.0826544	0.00177739	0.0556039	0.00862598	0	39.6625	0.046148	0.00622423	0	0.029265	0.010725	0.00805634	0	0.000530445	0.00456577	0.00182473	0	0.0693648	0	0.0195886	7.75207e-05		11.9348	47.9482		0.078442	0.0310174	0.0826544	0.00177739	0.0556039	0.00862598		39.6625	0.046148	0.00622423		0.029265	0.010725	0.00805634		0.000530445	0.00456577	0.00182473
8.5	Line_5_49	11.9341	47.9617	0	0.0946673	0.0286559	0.078687	0.00229032	0.0827718	0.00113754	0	39.6337	0.0156219	0.00799839	0	0.0322968	0.00908598	0.00736407	0	0.000489058	0.00451388	0.00253846	0	0.0694078	0	0.0313693	0.00159533		11.9341	47.9617		0.0946673	0.0286559	0.078687	0.00229032	0.0827718	0.00113754		39.6337	0.0156219	0.00799839		0.0322968	0.00908598	0.00736407		0.000489058	0.00451388	0.00253846
8.55	Line_5_50	11.9326	47.9739	0	0.113848	0.029957	0.0747757	0.00159304	0.0944325	0	0	39.5969	0.0237064	0.00329814	0	0.0338359	0.00818352	0.00650288	0	0.000468573	0.00518898	0.0022632	0	0.0692936	0	0.0262627	0.00303622		11.9326	47.9739		0.113848	0.029957	0.0747757	0.00159304	0.0944325			39.5969	0.0237064	0.00329814		0.0338359	0.00818352	0.00650288		0.000468573	0.00518898	0.0022632
8.6	Line_5_51	11.9196	47.9557	0	0.0309212	0.0273532	0.0632667	0.00143866	0.120255	0	0	39.6899	0.0400144	0.00139369	0	0.0354712	0.00868881	0.00653291	0	0.000505016	0.00459692	0.00187373	0	0.0704935	0	0.0168135	0.00516756		11.9196	47.9557		0.0309212	0.0273532	0.0632667	0.00143866	0.120255			39.6899	0.0400144	0.00139369		0.0354712	0.00868881	0.00653291		0.000505016	0.00459692	0.00187373
8.65	Line_5_52	11.9164	47.9803	0	0.0683775	0.0260239	0.0639121	0.00133836	0.146037	0	0	39.6176	0.0400151	0	0.000121645	0.0395867	0.00811041	0.0067363	0	0.000714333	0.00406541	0.0011905	0	0.069685	0	0.00660312	0.00317743		11.9164	47.9803		0.0683775	0.0260239	0.0639121	0.00133836	0.146037			39.6176	0.0400151		0.000121645	0.0395867	0.00811041	0.0067363		0.000714333	0.00406541	0.0011905
8.7	Line_5_53	11.9069	48.0043	0.00458871	0.11281	0.0371102	0.0944038	0.00141981	0.164001	0	0	39.5124	0.0179814	0	0.00116395	0.0466753	0.0112938	0.00426449	0	0.00076102	0.00489971	0.00167273	0	0.0706265	0	0	0.00277108		11.9069	48.0043	0.00458871	0.11281	0.0371102	0.0944038	0.00141981	0.164001			39.5124	0.0179814		0.00116395	0.0466753	0.0112938	0.00426449		0.00076102	0.00489971	0.00167273
8.75	Line_5_54	11.8881	47.9906	0.0348549	0.119496	0.0362197	0.0976824	0.00308945	0.190677	0.0252752	0	39.4394	0.0191314	0	0.00138438	0.0549484	0.0167374	0.00252558	0	0.0013917	0.00572521	0.00171566	0	0.0692139	0	0	0.00180083		11.8881	47.9906	0.0348549	0.119496	0.0362197	0.0976824	0.00308945	0.190677	0.0252752		39.4394	0.0191314		0.00138438	0.0549484	0.0167374	0.00252558		0.0013917	0.00572521	0.00171566
8.8	Line_5_55	11.896	47.989	0.0179621	0.116807	0.0425549	0.101993	0.00303449	0.170307	0.0264795	0	39.4699	0.00617039	0	0.000271878	0.059339	0.0179052	0.0011155	0	0.00160654	0.00714265	0.00191025	0	0.0692835	0	0	0.00117643		11.896	47.989	0.0179621	0.116807	0.0425549	0.101993	0.00303449	0.170307	0.0264795		39.4699	0.00617039		0.000271878	0.059339	0.0179052	0.0011155		0.00160654	0.00714265	0.00191025
8.85	Line_5_56	11.9126	47.9999	0	0.136712	0.0310798	0.0917798	0.00264742	0.153122	0.0126332	0	39.4929	0	0	0.000200052	0.0662483	0.0205664	0.000983393	0	0.00123819	0.00662019	0.00171214	0	0.0684477	0	0	0.000643485		11.9126	47.9999		0.136712	0.0310798	0.0917798	0.00264742	0.153122	0.0126332		39.4929			0.000200052	0.0662483	0.0205664	0.000983393		0.00123819	0.00662019	0.00171214
8.9	Line_5_57	11.9263	48.0132	0	0.18368	0.0301147	0.0836827	0.00183702	0.132439	0	0	39.4618	0	0	0	0.0696471	0.0208553	0.000564087	0	0.000461158	0.00577589	0.00170764	0	0.0671022	0	0	0.000793639		11.9263	48.0132		0.18368	0.0301147	0.0836827	0.00183702	0.132439			39.4618				0.0696471	0.0208553	0.000564087		0.000461158	0.00577589	0.00170764
8.95	Line_5_58	11.9193	48.0023	0	0.144853	0.0292479	0.0798014	0.0019226	0.141691	0	0	39.5033	0.0117476	0	2.50569e-05	0.0712765	0.0198865	0.000178019	0	0.000453564	0.00638547	0.000917954	0	0.06556	0	0	0.00118074		11.9193	48.0023		0.144853	0.0292479	0.0798014	0.0019226	0.141691			39.5033	0.0117476		2.50569e-05	0.0712765	0.0198865	0.000178019		0.000453564	0.00638547	0.000917954
9	Line_5_59	11.9214	47.9971	0	0.136818	0.0296151	0.0786004	0.00170777	0.135125	0	0	39.5243	0.00828501	0	0.00094609	0.0701472	0.0189617	0.000815864	0	0.0010323	0.007415	0.00172981	0	0.0634007	0	0	0.00258094		11.9214	47.9971		0.136818	0.0296151	0.0786004	0.00170777	0.135125			39.5243	0.00828501		0.00094609	0.0701472	0.0189617	0.000815864		0.0010323	0.007415	0.00172981
9.05	Line_5_60	11.9215	47.9828	0	0.0992463	0.0280073	0.0635261	0.00152836	0.137111	0	0	39.5864	0.00811448	0	0.00162558	0.0725158	0.0196598	0.00120297	0	0	0.00818499	0.00261367	0	0.0639614	0	0	0.00199953		11.9215	47.9828		0.0992463	0.0280073	0.0635261	0.00152836	0.137111			39.5864	0.00811448		0.00162558	0.0725158	0.0196598	0.00120297			0.00818499	0.00261367
9.1	Line_5_61	11.9135	47.9709	0.0326586	0.0804538	0.0274008	0.0689471	0.00148056	0.142467	0	0	39.5905	0.00434117	0	0.00173457	0.0691281	0.0161557	0.00272896	0	0	0.00867727	0.00329153	0	0.0640594	0	0	0.00161401		11.9135	47.9709	0.0326586	0.0804538	0.0274008	0.0689471	0.00148056	0.142467			39.5905	0.00434117		0.00173457	0.0691281	0.0161557	0.00272896			0.00867727	0.00329153
9.15	Line_5_62	11.9193	47.9746	0.000491427	0.066205	0.036844	0.0719673	0.00175109	0.132587	0	0	39.6332	0	0	0.000816406	0.0660169	0.0124624	0.00524896	0	0.0002793	0.00873453	0.00360583	0	0.0647617	0	0	0.00112867		11.9193	47.9746	0.000491427	0.066205	0.036844	0.0719673	0.00175109	0.132587			39.6332			0.000816406	0.0660169	0.0124624	0.00524896		0.0002793	0.00873453	0.00360583
9.2	Line_5_63	11.9318	47.9743	0	0.111014	0.0334636	0.0656324	0.00161618	0.0982333	0	0	39.6012	0.0182072	0	0.000111505	0.0679033	0.01188	0.00801422	0	0.000203271	0.00764202	0.00349446	0	0.064111	0	0	0.00112567		11.9318	47.9743		0.111014	0.0334636	0.0656324	0.00161618	0.0982333			39.6012	0.0182072		0.000111505	0.0679033	0.01188	0.00801422		0.000203271	0.00764202	0.00349446
9.25	Line_5_64	11.9313	47.9568	0	0.06512	0.0306153	0.0643745	0.0018148	0.0835692	0	0	39.6757	0.0369927	0	0.000261351	0.0630546	0.0080075	0.00415838	0.00053559	0	0.00777361	0.00329513	0	0.0637903	0	0	0.00283442		11.9313	47.9568		0.06512	0.0306153	0.0643745	0.0018148	0.0835692			39.6757	0.0369927		0.000261351	0.0630546	0.0080075	0.00415838	0.00053559		0.00777361	0.00329513
9.3	Line_5_65	11.9302	47.9631	0	0.0828218	0.0308773	0.0871579	0.00190975	0.0722567	0	0	39.6423	0.0425819	0	0.000391543	0.0555088	0.00527897	0.0032165	0.0041197	0	0.00826011	0.00368684	0	0.0648406	0	0	0.00147193		11.9302	47.9631		0.0828218	0.0308773	0.0871579	0.00190975	0.0722567			39.6423	0.0425819		0.000391543	0.0555088	0.00527897	0.0032165	0.0041197		0.00826011	0.00368684
9.35	Line_5_66	11.9524	47.9735	0.00395848	0.124563	0.0291905	0.0549161	0.00191604	0.0627041	0.00317053	0	39.647	0.0053612	0	0.000245466	0.0489077	0.00363893	0.00229061	0.00371748	0	0.0104994	0.00353539	0	0.0657121	0	0	0.00276355		11.9524	47.9735	0.00395848	0.124563	0.0291905	0.0549161	0.00191604	0.0627041	0.00317053		39.647	0.0053612		0.000245466	0.0489077	0.00363893	0.00229061	0.00371748		0.0104994	0.00353539
9.4	Line_5_67	11.94	47.9717	0	0.0795522	0.0335741	0.0890578	0.00253166	0.0709178	0.00158142	0	39.6794	0	0.000634087	0	0.0410816	0.0018111	0.001204	0.00200615	0	0.0116977	0.00342975	0	0.0668776	0	0	0.00298572		11.94	47.9717		0.0795522	0.0335741	0.0890578	0.00253166	0.0709178	0.00158142		39.6794		0.000634087		0.0410816	0.0018111	0.001204	0.00200615		0.0116977	0.00342975
9.45	Line_5_68	11.9463	47.9646	0	0.0842559	0.0320533	0.063345	0.00225589	0.0706478	0.00480254	0	39.692	0	0.00504428	0	0.0324344	0.00487415	0.00219252	0.000110371	0.000817179	0.0109192	0.00264344	0	0.0678009	0	0.010714	0.00227924		11.9463	47.9646		0.0842559	0.0320533	0.063345	0.00225589	0.0706478	0.00480254		39.692		0.00504428		0.0324344	0.00487415	0.00219252	0.000110371	0.000817179	0.0109192	0.00264344
9.5	Line_5_69	11.9399	47.9668	0	0.106854	0.0292717	0.0709797	0.00328419	0.0834797	0.0217969	0	39.6333	0	0.00227814	0	0.0263579	0.00875925	0.00212043	0	0.0042957	0.0085075	0.00202075	0	0.0686394	0	0.0194277	0.00189636		11.9399	47.9668		0.106854	0.0292717	0.0709797	0.00328419	0.0834797	0.0217969		39.6333		0.00227814		0.0263579	0.00875925	0.00212043		0.0042957	0.0085075	0.00202075
9.55	Line_5_70	11.9456	47.9573	0	0.0880546	0.0283552	0.0666214	0.00293143	0.0634335	0.00790325	0	39.6832	0	0	0	0.0313678	0.0142736	0.00186996	0	0.00776453	0.00478014	0.00185859	0	0.0689073	0	0.0251695	0.000627441		11.9456	47.9573		0.0880546	0.0283552	0.0666214	0.00293143	0.0634335	0.00790325		39.6832				0.0313678	0.0142736	0.00186996		0.00776453	0.00478014	0.00185859
9.6	Line_5_71	11.9402	47.9767	0	0.112424	0.0282092	0.0753156	0.00281231	0.0828691	0.00210422	0.000748074	39.6254	0	0	0	0.0428957	0.0169304	0.000939081	0	0.00722248	0.00268324	0.00159704	0	0.0675461	0	0.0127952	0.00065156		11.9402	47.9767		0.112424	0.0282092	0.0753156	0.00281231	0.0828691	0.00210422	0.000748074	39.6254				0.0428957	0.0169304	0.000939081		0.00722248	0.00268324	0.00159704
9.65	Line_5_72	11.9267	47.9705	0	0.0653381	0.0258181	0.0644528	0.0028621	0.121984	0	0	39.6598	0	0.00158636	0.000649467	0.0543439	0.0171137	0.000626155	0.000275405	0.00559584	0.00174549	0.000978216	0	0.0636493	0	0.016006	0		11.9267	47.9705		0.0653381	0.0258181	0.0644528	0.0028621	0.121984			39.6598		0.00158636	0.000649467	0.0543439	0.0171137	0.000626155	0.000275405	0.00559584	0.00174549	0.000978216
9.7	Line_5_73	11.9016	47.9576	0.071668	0.0710786	0.0307961	0.0635301	0.00359324	0.155619	0.00269038	0	39.5683	0.00663068	0.00184089	0.0023427	0.062223	0.0190561	0.0023948	0.000779926	0.00326252	0.00196364	0.0012982	0	0.0599046	0	0.0117761	0		11.9016	47.9576	0.071668	0.0710786	0.0307961	0.0635301	0.00359324	0.155619	0.00269038		39.5683	0.00663068	0.00184089	0.0023427	0.062223	0.0190561	0.0023948	0.000779926	0.00326252	0.00196364	0.0012982
9.75	Line_6_01	11.9072	48.0005	0	0.137676	0.0318099	0.0716872	0.00399975	0.163248	0.00417927	0	39.4775	0.0425151	0.000267421	0.0018825	0.0610768	0.0208343	0.00461147	0.000441811	0.00180444	0.00231335	0.00152461	0	0.0594581	0	0.00544932	0		11.9072	48.0005		0.137676	0.0318099	0.0716872	0.00399975	0.163248	0.00417927		39.4775	0.0425151	0.000267421	0.0018825	0.0610768	0.0208343	0.00461147	0.000441811	0.00180444	0.00231335	0.00152461
9.8	Line_6_02	11.9129	47.9772	0	0.114442	0.026125	0.0486138	0.00296664	0.135778	0.00545455	0	39.5353	0.0851465	0	0.00170169	0.0587757	0.0208815	0.00557678	0	0.000325968	0.00413945	0.00234774	0	0.0583973	0	0.00385715	0		11.9129	47.9772		0.114442	0.026125	0.0486138	0.00296664	0.135778	0.00545455		39.5353	0.0851465		0.00170169	0.0587757	0.0208815	0.00557678		0.000325968	0.00413945	0.00234774
9.85	Line_6_03	11.9087	47.9596	0	0.0702891	0.0324882	0.0758047	0.0021251	0.112467	0	0	39.5933	0.0854965	0.00124661	0.000790796	0.0519265	0.0201093	0.00620546	0	0.000469345	0.00485254	0.00275051	0	0.0601099	0	0.0106644	0.000661467		11.9087	47.9596		0.0702891	0.0324882	0.0758047	0.0021251	0.112467			39.5933	0.0854965	0.00124661	0.000790796	0.0519265	0.0201093	0.00620546		0.000469345	0.00485254	0.00275051
9.9	Line_6_04	11.9164	47.9757	0	0.116397	0.0271087	0.122915	0.00161181	0.0876942	0	0	39.5419	0.0482743	0.000241434	0	0.0506787	0.0175982	0.00549707	0	0.000912468	0.00528067	0.00219629	0	0.0625944	0	0.016997	0		11.9164	47.9757		0.116397	0.0271087	0.122915	0.00161181	0.0876942			39.5419	0.0482743	0.000241434		0.0506787	0.0175982	0.00549707		0.000912468	0.00528067	0.00219629
9.95	Line_6_05	11.9094	47.9623	0	0.0632396	0.0315815	0.165735	0.0013455	0.0689373	0	0	39.6053	0.0366756	0	0	0.0496833	0.0151368	0.00472746	0	0.000332535	0.00459818	0.00245229	0	0.064112	0	0.0144593	0		11.9094	47.9623		0.0632396	0.0315815	0.165735	0.0013455	0.0689373			39.6053	0.0366756			0.0496833	0.0151368	0.00472746		0.000332535	0.00459818	0.00245229
10	Line_6_06	11.8986	47.9533	0.0499232	0.0684747	0.032918	0.186903	0.00148446	0.0619281	0	0	39.5605	0.043495	0	0	0.0470193	0.0123622	0.00350101	0	9.38163e-05	0.00297829	0.00209456	0	0.064755	0	0.00914961	0.000533799		11.8986	47.9533	0.0499232	0.0684747	0.032918	0.186903	0.00148446	0.0619281			39.5605	0.043495			0.0470193	0.0123622	0.00350101		9.38163e-05	0.00297829	0.00209456
10.05	Line_6_07	11.9249	47.981	0	0.12672	0.0303261	0.135317	0.00178175	0.0662179	0	0	39.552	0.031734	0	0	0.050179	0.015382	0.00348118	0	0.000135005	0.00210919	0.00207444	0	0.0649419	0	0.0116406	2.24479e-05		11.9249	47.981		0.12672	0.0303261	0.135317	0.00178175	0.0662179			39.552	0.031734			0.050179	0.015382	0.00348118		0.000135005	0.00210919	0.00207444
10.1	Line_6_08	11.9345	47.9881	0.00027353	0.143775	0.0342205	0.0911209	0.00118039	0.087398	0	0	39.5559	0.00551633	0	0	0.0518781	0.0182765	0.0031113	0	0.000150141	0.00190235	0.00246628	0	0.0652125	0	0.0141051	0.000948		11.9345	47.9881	0.00027353	0.143775	0.0342205	0.0911209	0.00118039	0.087398			39.5559	0.00551633			0.0518781	0.0182765	0.0031113		0.000150141	0.00190235	0.00246628
10.15	Line_6_09	11.9298	48.0056	0	0.161678	0.0334205	0.0849666	0.00179942	0.117156	0	0	39.5107	0.00627607	0	0.000148312	0.0496377	0.0166779	0.00295733	0	0	0.00369865	0.00258417	0	0.0650162	0	0.00696809	0.000911075		11.9298	48.0056		0.161678	0.0334205	0.0849666	0.00179942	0.117156			39.5107	0.00627607		0.000148312	0.0496377	0.0166779	0.00295733			0.00369865	0.00258417
10.2	Line_6_10	11.9082	47.9935	0	0.0941592	0.0373964	0.0954042	0.00174758	0.147872	0	0	39.5493	0.0245681	0	0.000397091	0.0530839	0.0168797	0.00301445	0	0.000298293	0.00498389	0.00236223	0	0.0662213	0	0.000324421	0.000352917		11.9082	47.9935		0.0941592	0.0373964	0.0954042	0.00174758	0.147872			39.5493	0.0245681		0.000397091	0.0530839	0.0168797	0.00301445		0.000298293	0.00498389	0.00236223
10.25	Line_6_11	11.912	47.999	0	0.122217	0.0293937	0.0778863	0.00136186	0.156228	0	0	39.5158	0.0283945	0	0.000692328	0.0624127	0.0167835	0.00303499	0	0.000471666	0.00559642	0.00232341	0	0.0659158	0	0	0.000492232		11.912	47.999		0.122217	0.0293937	0.0778863	0.00136186	0.156228			39.5158	0.0283945		0.000692328	0.0624127	0.0167835	0.00303499		0.000471666	0.00559642	0.00232341
10.3	Line_6_12	11.8994	47.9865	0	0.0832753	0.0273436	0.0887968	0.000679647	0.171003	0	0	39.5384	0.0279601	0	0.000449002	0.0789352	0.0205187	0.00274457	0	0.000114	0.00508848	0.00226234	0	0.0651115	0	0	0.00150451		11.8994	47.9865		0.0832753	0.0273436	0.0887968	0.000679647	0.171003			39.5384	0.0279601		0.000449002	0.0789352	0.0205187	0.00274457		0.000114	0.00508848	0.00226234
10.35	Line_6_13	11.8917	47.9984	0	0.109387	0.0336767	0.0722469	0.00100912	0.203673	0	0	39.4718	0.0280978	0	0	0.0933752	0.026826	0.00186079	0	0.000197561	0.00386306	0.00207154	0	0.0605832	0	0	0.00128049		11.8917	47.9984		0.109387	0.0336767	0.0722469	0.00100912	0.203673			39.4718	0.0280978			0.0933752	0.026826	0.00186079		0.000197561	0.00386306	0.00207154
10.4	Line_6_14	11.8847	48.0127	0	0.133569	0.0283132	0.0761703	0.00130656	0.232326	0	0	39.41	0.0208629	0	0	0.10027	0.0314369	0.00166354	0	0.00059084	0.00400239	0.00279173	0	0.0573592	0	0	0.00194915		11.8847	48.0127		0.133569	0.0283132	0.0761703	0.00130656	0.232326			39.41	0.0208629			0.10027	0.0314369	0.00166354		0.00059084	0.00400239	0.00279173
10.45	Line_6_15	11.8901	48.0018	0	0.106384	0.0286695	0.0796961	0.0012048	0.211904	0	0	39.4736	0.01408	0	0.000112364	0.098251	0.029595	0.00192793	0	9.20696e-06	0.00307897	0.00232857	0	0.0559521	0	0.00056103	0.000827328		11.8901	48.0018		0.106384	0.0286695	0.0796961	0.0012048	0.211904			39.4736	0.01408		0.000112364	0.098251	0.029595	0.00192793		9.20696e-06	0.00307897	0.00232857
10.5	Line_6_16	11.9	48.0098	0	0.129315	0.0318107	0.074148	0.00136176	0.201424	0	0	39.4682	0.000882218	0	0.000898342	0.0862295	0.0274145	0.00270174	0	0.00149085	0.00344929	0.00211709	0	0.057446	0	0.00133856	0		11.9	48.0098		0.129315	0.0318107	0.074148	0.00136176	0.201424			39.4682	0.000882218		0.000898342	0.0862295	0.0274145	0.00270174		0.00149085	0.00344929	0.00211709
10.55	Line_6_17	11.8946	47.9763	0.0431481	0.0758401	0.0310064	0.0746619	0.00137577	0.184627	0	0	39.5375	0	0	0.00103137	0.0829717	0.0266419	0.00284688	0	0.00126938	0.00401432	0.0017836	0	0.059283	0	0	0.00109922		11.8946	47.9763	0.0431481	0.0758401	0.0310064	0.0746619	0.00137577	0.184627			39.5375			0.00103137	0.0829717	0.0266419	0.00284688		0.00126938	0.00401432	0.0017836
10.6	Line_6_18	11.9154	47.9865	0	0.0944812	0.0293685	0.0844386	0.00143319	0.142222	0.000452665	0	39.5754	0	0	0.000402864	0.0770623	0.0215255	0.00196977	0	0	0.0057878	0.00250291	0	0.0606825	0	0	0.00029336		11.9154	47.9865		0.0944812	0.0293685	0.0844386	0.00143319	0.142222	0.000452665		39.5754			0.000402864	0.0770623	0.0215255	0.00196977			0.0057878	0.00250291
10.65	Line_6_19	11.9192	47.9558	0	0.0403459	0.0391933	0.0710936	0.000142247	0.110055	0	0	39.6762	0.018165	0	0.000569944	0.0728724	0.0191438	0.0026097	0.000360333	0	0.00746157	0.00331299	0	0.0631364	0	0	0.00039322		11.9192	47.9558		0.0403459	0.0391933	0.0710936	0.000142247	0.110055			39.6762	0.018165		0.000569944	0.0728724	0.0191438	0.0026097	0.000360333		0.00746157	0.00331299
10.7	Line_6_20	11.9305	47.9691	0.0248006	0.117357	0.0339507	0.0715411	0	0.0894923	0.00114505	0	39.5858	0.0162028	0	0.000540048	0.0615446	0.0166863	0.00291803	3.7064e-05	1.24686e-05	0.00786055	0.003455	0	0.0659492	0	0	0.00105093		11.9305	47.9691	0.0248006	0.117357	0.0339507	0.0715411		0.0894923	0.00114505		39.5858	0.0162028		0.000540048	0.0615446	0.0166863	0.00291803	3.7064e-05	1.24686e-05	0.00786055	0.003455
10.75	Line_6_21	11.9291	47.9661	0.0477467	0.118587	0.0347811	0.081038	0.000710726	0.0856479	0	0	39.5787	0	0	0.00086737	0.0555984	0.0162741	0.00219895	0.000439966	0.000200824	0.00778411	0.00325535	0	0.0669109	0	0.00305425	0.00104736		11.9291	47.9661	0.0477467	0.118587	0.0347811	0.081038	0.000710726	0.0856479			39.5787			0.00086737	0.0555984	0.0162741	0.00219895	0.000439966	0.000200824	0.00778411	0.00325535
10.8	Line_6_22	11.9338	47.9603	0.00933152	0.0589703	0.0350751	0.0750651	0.0007749	0.0845387	0	0	39.6926	0	0	3.81444e-05	0.0481239	0.015523	0.00198155	0	0.000851635	0.00691587	0.00348703	0	0.066714	0	0.00523319	0.000653628		11.9338	47.9603	0.00933152	0.0589703	0.0350751	0.0750651	0.0007749	0.0845387			39.6926			3.81444e-05	0.0481239	0.015523	0.00198155		0.000851635	0.00691587	0.00348703
10.85	Line_6_23	11.9397	47.9674	0.00738867	0.0848172	0.0380842	0.0601685	0.00121681	0.0831922	0	0	39.6694	0	0	0.000628553	0.0474025	0.0158941	0.00377644	0.00055808	0.000660407	0.00626404	0.00258446	0	0.0673384	0	0.00317707	0.000404177		11.9397	47.9674	0.00738867	0.0848172	0.0380842	0.0601685	0.00121681	0.0831922			39.6694			0.000628553	0.0474025	0.0158941	0.00377644	0.00055808	0.000660407	0.00626404	0.00258446
10.9	Line_6_24	11.9347	47.9803	0	0.110977	0.0284509	0.100934	0.00112156	0.0807248	0	0	39.6094	0	0	0.000734949	0.0519423	0.0162156	0.00455641	0	0.000782898	0.00575379	0.00235597	0	0.0680347	0	0.0023546	0.000568732		11.9347	47.9803		0.110977	0.0284509	0.100934	0.00112156	0.0807248			39.6094			0.000734949	0.0519423	0.0162156	0.00455641		0.000782898	0.00575379	0.00235597
10.95	Line_6_25	11.8946	47.953	0.0800053	0.0680979	0.0327342	0.149077	0.000570333	0.109798	0	0	39.5467	0	0.00114068	0	0.0609485	0.0198223	0.00416001	0.000458221	0.000517614	0.00544259	0.00238628	0	0.066597	0	0.00360967	0.000350683		11.8946	47.953	0.0800053	0.0680979	0.0327342	0.149077	0.000570333	0.109798			39.5467		0.00114068		0.0609485	0.0198223	0.00416001	0.000458221	0.000517614	0.00544259	0.00238628
11	Line_6_26	11.9113	47.9999	0	0.142609	0.0299883	0.138647	0.000338459	0.123266	0	0	39.4808	0	0.00243562	0	0.0609404	0.0237916	0.00412131	0	0.000675824	0.00531983	0.00181714	0	0.0644158	0	0.00869834	0.000869313		11.9113	47.9999		0.142609	0.0299883	0.138647	0.000338459	0.123266			39.4808		0.00243562		0.0609404	0.0237916	0.00412131		0.000675824	0.00531983	0.00181714
11.05	Line_6_27	11.9082	47.9834	0.0119128	0.112104	0.0290413	0.13823	0.000768318	0.116794	0	0	39.5215	0	0.00234459	0.00063392	0.0644996	0.0254008	0.00334591	0	0.000762148	0.00566332	0.00119633	0	0.0623133	0	0.0110085	0.000865779		11.9082	47.9834	0.0119128	0.112104	0.0290413	0.13823	0.000768318	0.116794			39.5215		0.00234459	0.00063392	0.0644996	0.0254008	0.00334591		0.000762148	0.00566332	0.00119633
11.1	Line_6_28	11.8955	47.9274	0.0940274	0.104099	0.0304999	0.121586	0.000601615	0.0997309	0.0464511	0.00789822	39.493	0.0184169	8.58916e-06	0	0.0548945	0.0229434	0.00484987	0	0.00048447	0.00594503	0.00126786	0	0.0611818	0	0.0074812	0.00163943		11.8955	47.9274	0.0940274	0.104099	0.0304999	0.121586	0.000601615	0.0997309	0.0464511	0.00789822	39.493	0.0184169	8.58916e-06		0.0548945	0.0229434	0.00484987		0.00048447	0.00594503	0.00126786
11.15	Line_6_29	11.9025	47.8941	0.0717633	0.0750873	0.026881	0.100735	0.00177113	0.0712686	0.0956607	0.0108469	39.5638	0.0480627	0	0	0.0437026	0.0192027	0.00435327	0	0	0.00586041	0.000652088	0	0.061863	0	0	0.00196729		11.9025	47.8941	0.0717633	0.0750873	0.026881	0.100735	0.00177113	0.0712686	0.0956607	0.0108469	39.5638	0.0480627			0.0437026	0.0192027	0.00435327			0.00586041	0.000652088
11.2	Line_6_30	11.8596	47.8121	0.374805	0.150819	0.0338103	0.0829219	0.00184921	0.0687231	0.125212	0.0141087	39.2952	0.0579396	0	0.000188348	0.0347595	0.012528	0.00323765	0	0.0007363	0.00463296	0.000422499	0	0.0631442	0	0	0.00327129		11.8596	47.8121	0.374805	0.150819	0.0338103	0.0829219	0.00184921	0.0687231	0.125212	0.0141087	39.2952	0.0579396		0.000188348	0.0347595	0.012528	0.00323765		0.0007363	0.00463296	0.000422499
11.25	Line_6_31	11.8667	47.8062	0.301264	0.084405	0.0361109	0.0672008	0.00243183	0.0786268	0.143119	0.016918	39.428	0.0432073	0	0	0.0384474	0.0128698	0.00248715	0	0.000912337	0.00385506	0.000466988	0	0.0638687	0	0	0.00292823		11.8667	47.8062	0.301264	0.084405	0.0361109	0.0672008	0.00243183	0.0786268	0.143119	0.016918	39.428	0.0432073			0.0384474	0.0128698	0.00248715		0.000912337	0.00385506	0.000466988
11.3	Line_6_32	11.8678	47.8154	0.286082	0.0935984	0.0312192	0.0745714	0.00202065	0.0850525	0.145726	0.0145406	39.4164	0.0357066	0	0	0.0432385	0.0147557	0.00119568	0	0.00136775	0.0044793	0.00122184	0	0.0646438	0	0	0.000875824		11.8678	47.8154	0.286082	0.0935984	0.0312192	0.0745714	0.00202065	0.0850525	0.145726	0.0145406	39.4164	0.0357066			0.0432385	0.0147557	0.00119568		0.00136775	0.0044793	0.00122184
11.35	Line_6_33	11.9052	47.8981	0.0893275	0.112229	0.0312104	0.0711071	0.00305755	0.0933336	0.116648	0.00997162	39.5111	0.0217827	0	0	0.04981	0.0162706	0.000206157	6.38917e-05	0.000890942	0.00439971	0.00258275	0	0.0627925	0	0	0		11.9052	47.8981	0.0893275	0.112229	0.0312104	0.0711071	0.00305755	0.0933336	0.116648	0.00997162	39.5111	0.0217827			0.04981	0.0162706	0.000206157	6.38917e-05	0.000890942	0.00439971	0.00258275
11.4	Line_6_34	11.8839	47.8704	0.186101	0.0396816	0.023685	0.0730255	0.00257402	0.117755	0.085713	0.00306136	39.5598	0.00638945	0	0.000911377	0.0565655	0.0196037	0.000353713	0	0.000364466	0.00428744	0.00284669	0	0.0629433	0	0	4.34943e-05		11.8839	47.8704	0.186101	0.0396816	0.023685	0.0730255	0.00257402	0.117755	0.085713	0.00306136	39.5598	0.00638945		0.000911377	0.0565655	0.0196037	0.000353713		0.000364466	0.00428744	0.00284669
11.45	Line_6_35	11.9046	47.9543	0.0870413	0.127409	0.0337318	0.0815553	0.00245615	0.132161	0.0425991	0	39.4842	0	0	0.000735715	0.0576129	0.0213703	0.00106912	0	0	0.003921	0.00253958	0	0.0622789	0	0	0.000401291		11.9046	47.9543	0.0870413	0.127409	0.0337318	0.0815553	0.00245615	0.132161	0.0425991		39.4842			0.000735715	0.0576129	0.0213703	0.00106912			0.003921	0.00253958
11.5	Line_6_36	11.9212	47.9704	0	0.0609884	0.0339386	0.0632159	0.00197257	0.131931	0.0109556	0	39.6487	0	0	0	0.0588877	0.0241442	0.00185871	0	9.36745e-05	0.00383677	0.00244494	0	0.0638498	0	0.000802328	0.00076663		11.9212	47.9704		0.0609884	0.0339386	0.0632159	0.00197257	0.131931	0.0109556		39.6487				0.0588877	0.0241442	0.00185871		9.36745e-05	0.00383677	0.00244494
11.55	Line_6_37	11.9242	47.9948	0	0.130291	0.0344902	0.0949235	0.00162343	0.1161	0	0	39.5439	0	0.00107966	0	0.0599036	0.0233465	0.002206	0	0.000389853	0.00501138	0.00225609	0	0.0647115	0	0	0.00071611		11.9242	47.9948		0.130291	0.0344902	0.0949235	0.00162343	0.1161			39.5439		0.00107966		0.0599036	0.0233465	0.002206		0.000389853	0.00501138	0.00225609
11.6	Line_6_38	11.9391	47.9752	0	0.0957815	0.0280526	0.0642019	0.00148146	0.0926898	0	0	39.6503	0	0.0029339	0	0.0550271	0.0182037	0.00213137	0	0.00140391	0.00581638	0.00168665	0	0.0655024	0	0	0.000414713		11.9391	47.9752		0.0957815	0.0280526	0.0642019	0.00148146	0.0926898			39.6503		0.0029339		0.0550271	0.0182037	0.00213137		0.00140391	0.00581638	0.00168665
11.65	Line_6_39	11.9417	47.9647	0	0.0640938	0.0277457	0.0434768	0.00144593	0.0926215	0	0	39.7112	0.00927951	0.00246986	0	0.0490519	0.0150465	0.00222028	0	0.00141322	0.00556715	0.00163027	0	0.0655457	0	0	0.000816555		11.9417	47.9647		0.0640938	0.0277457	0.0434768	0.00144593	0.0926215			39.7112	0.00927951	0.00246986		0.0490519	0.0150465	0.00222028		0.00141322	0.00556715	0.00163027
11.7	Line_6_40	11.9293	47.98	0	0.080849	0.037994	0.0764279	0.00160841	0.10623	0	0	39.6413	0.0115754	0.0022398	0.000139667	0.0446091	0.00989805	0.00258943	0	0.00104067	0.00373245	0.000714336	0	0.0671093	0	0.00133422	0.00135628		11.9293	47.98		0.080849	0.037994	0.0764279	0.00160841	0.10623			39.6413	0.0115754	0.0022398	0.000139667	0.0446091	0.00989805	0.00258943		0.00104067	0.00373245	0.000714336
11.75	Line_6_41	11.9136	47.9812	0.023695	0.0795463	0.0277749	0.0763769	0.0015287	0.14236	0	0	39.5908	0.0239805	0	0.00134838	0.0491117	0.0121422	0.00364387	0	0.000422986	0.00324108	4.68109e-05	0	0.0680301	0	0	0.00120475		11.9136	47.9812	0.023695	0.0795463	0.0277749	0.0763769	0.0015287	0.14236			39.5908	0.0239805		0.00134838	0.0491117	0.0121422	0.00364387		0.000422986	0.00324108	4.68109e-05
11.8	Line_6_42	11.8992	48.0042	0	0.109151	0.0329027	0.109826	0.00247597	0.173411	0.00899701	0	39.4931	0.0164483	0	0.00198613	0.0522865	0.0173447	0.00399642	0	4.24445e-05	0.00411576	0.000392428	0	0.0695078	0	0	0.000567874		11.8992	48.0042		0.109151	0.0329027	0.109826	0.00247597	0.173411	0.00899701		39.4931	0.0164483		0.00198613	0.0522865	0.0173447	0.00399642		4.24445e-05	0.00411576	0.000392428
11.85	Line_6_43	11.8929	47.9845	0.0167696	0.0948229	0.0266727	0.100339	0.00254811	0.174824	0.00952106	0	39.4955	0.0213459	0	0.00152722	0.0656096	0.0326703	0.00364729	0	0.000252682	0.00492245	0.000928295	0	0.070293	0	0	0.00037464		11.8929	47.9845	0.0167696	0.0948229	0.0266727	0.100339	0.00254811	0.174824	0.00952106		39.4955	0.0213459		0.00152722	0.0656096	0.0326703	0.00364729		0.000252682	0.00492245	0.000928295
11.9	Line_6_44	11.8884	47.9803	0	0.0823869	0.0309975	0.115112	0.00174516	0.167843	0	0	39.5023	0.0180926	0	0.000636684	0.0833637	0.0509199	0.00369147	0	0.000106603	0.00501268	0.00113863	0	0.0670651	0	0	0.000853965		11.8884	47.9803		0.0823869	0.0309975	0.115112	0.00174516	0.167843			39.5023	0.0180926		0.000636684	0.0833637	0.0509199	0.00369147		0.000106603	0.00501268	0.00113863
11.95	Line_6_45	11.8917	47.9928	0	0.112651	0.0271418	0.112607	0.00122815	0.176501	0	0	39.4654	0.00716711	0	0	0.0840281	0.0510212	0.00218056	0	0.000153221	0.00481397	0.00149206	0	0.0629732	0	0.00590789	0.000210742		11.8917	47.9928		0.112651	0.0271418	0.112607	0.00122815	0.176501			39.4654	0.00716711			0.0840281	0.0510212	0.00218056		0.000153221	0.00481397	0.00149206
12	Line_6_46	11.8853	48.003	0	0.113328	0.0289024	0.110902	0.00131383	0.198086	0	0	39.4437	0.0194602	0	8.46432e-05	0.0783396	0.0461005	0.00238563	0	0.00043933	0.00495114	0.00192453	0	0.0607999	0	0.000265744	0.000726472		11.8853	48.003		0.113328	0.0289024	0.110902	0.00131383	0.198086			39.4437	0.0194602		8.46432e-05	0.0783396	0.0461005	0.00238563		0.00043933	0.00495114	0.00192453
12.05	Line_6_47	11.8949	47.9691	0	0.0202366	0.0271403	0.0766556	0.00136817	0.178278	0	0	39.6296	0.0263969	0	0.000414419	0.0680485	0.0370618	0.00284173	0	0.000364988	0.00484172	0.00181919	0	0.0602964	0	0	0.000614348		11.8949	47.9691		0.0202366	0.0271403	0.0766556	0.00136817	0.178278			39.6296	0.0263969		0.000414419	0.0680485	0.0370618	0.00284173		0.000364988	0.00484172	0.00181919
12.1	Line_6_48	11.9021	47.9827	0	0.0727164	0.0328713	0.0954864	0.00164535	0.154481	0	0	39.5671	0.0211066	0	0.000277486	0.0655144	0.0314075	0.00347066	0	0.000566147	0.00508357	0.0020325	0	0.0604768	0	0	0.00100533		11.9021	47.9827		0.0727164	0.0328713	0.0954864	0.00164535	0.154481			39.5671	0.0211066		0.000277486	0.0655144	0.0314075	0.00347066		0.000566147	0.00508357	0.0020325
12.15	Line_6_49	11.9377	47.9935	0	0.151888	0.0295998	0.0490834	0.000964618	0.113003	0	0	39.5553	0.00670238	0	0	0.0647848	0.0256059	0.00309633	0	0.000657546	0.0046665	0.0016798	0	0.0602131	0	0.00126763	0.000296709		11.9377	47.9935		0.151888	0.0295998	0.0490834	0.000964618	0.113003			39.5553	0.00670238			0.0647848	0.0256059	0.00309633		0.000657546	0.0046665	0.0016798
12.2	Line_6_50	11.9236	47.9654	0	0.0673979	0.0349889	0.073107	0.00126365	0.105626	0	0	39.6471	0.0144429	0	0	0.0683473	0.0265097	0.00249216	0	0.000299655	0.0050794	0.00243899	0	0.0615538	0	0	0.000408978		11.9236	47.9654		0.0673979	0.0349889	0.073107	0.00126365	0.105626			39.6471	0.0144429			0.0683473	0.0265097	0.00249216		0.000299655	0.0050794	0.00243899
12.25	Line_6_51	11.9271	47.9764	0	0.0926057	0.0347019	0.0785469	0.00125089	0.104665	0	0	39.6168	0.00833582	0	0	0.061025	0.0220118	0.0017818	0.000813538	0.000865794	0.00579099	0.00192605	0	0.0623472	0	0.0030762	0		11.9271	47.9764		0.0926057	0.0347019	0.0785469	0.00125089	0.104665			39.6168	0.00833582			0.061025	0.0220118	0.0017818	0.000813538	0.000865794	0.00579099	0.00192605
12.3	Line_6_52	11.9362	47.9769	0	0.087854	0.0282001	0.0573391	0.00121828	0.106581	0	0	39.6545	0	0	0	0.0542778	0.0190798	0.00181768	0.000682612	0.000315678	0.00579031	0.00255277	0	0.0637503	0	0.00288193	0		11.9362	47.9769		0.087854	0.0282001	0.0573391	0.00121828	0.106581			39.6545				0.0542778	0.0190798	0.00181768	0.000682612	0.000315678	0.00579031	0.00255277
12.35	Line_6_53	11.9169	47.9737	0.0241179	0.0810569	0.0320751	0.0707726	0.00105056	0.130081	0	0	39.601	0.0161265	0	0.000434334	0.0543991	0.0225129	0.00300898	0	0.000698837	0.00510412	0.00220124	0	0.0641655	0	0	0.000568986		11.9169	47.9737	0.0241179	0.0810569	0.0320751	0.0707726	0.00105056	0.130081			39.601	0.0161265		0.000434334	0.0543991	0.0225129	0.00300898		0.000698837	0.00510412	0.00220124
12.4	Line_6_54	11.9156	47.9703	0	0.0610502	0.0340788	0.0603592	0.00177577	0.134181	0	0	39.6296	0.029893	0	0.000884785	0.0595939	0.0283083	0.00252997	0.00024349	0.00122822	0.00379906	0.00134307	0	0.064403	0	0	0.000798733		11.9156	47.9703		0.0610502	0.0340788	0.0603592	0.00177577	0.134181			39.6296	0.029893		0.000884785	0.0595939	0.0283083	0.00252997	0.00024349	0.00122822	0.00379906	0.00134307
12.45	Line_7_01	11.913	47.9557	0	0.0153624	0.0308421	0.071689	0.00190635	0.127147	0	0	39.6958	0.0233909	0	0.00106583	0.0594744	0.0293736	0.00283515	0	0.00127196	0.00368256	0.0015991	0	0.0653512	0	0	0.000517724		11.913	47.9557		0.0153624	0.0308421	0.071689	0.00190635	0.127147			39.6958	0.0233909		0.00106583	0.0594744	0.0293736	0.00283515		0.00127196	0.00368256	0.0015991
12.5	Line_7_02	11.9298	47.9752	0	0.100069	0.0326899	0.0700135	0.00237979	0.0984179	0	0	39.6123	0.0166166	0	0.000231087	0.0576904	0.0307299	0.00164228	0.000514026	0.000329476	0.00293701	0.00227365	0	0.0651789	0	0	0.000947053		11.9298	47.9752		0.100069	0.0326899	0.0700135	0.00237979	0.0984179			39.6123	0.0166166		0.000231087	0.0576904	0.0307299	0.00164228	0.000514026	0.000329476	0.00293701	0.00227365
12.55	Line_7_03	11.9372	47.9705	0.00390906	0.0951252	0.0307318	0.0688936	0.00198501	0.0832123	0	0	39.6448	0.0025117	0	0.000202747	0.056602	0.032249	0.00105101	0.000192339	0	0.00314986	0.00168698	0	0.0658458	0	0	0.000170047		11.9372	47.9705	0.00390906	0.0951252	0.0307318	0.0688936	0.00198501	0.0832123			39.6448	0.0025117		0.000202747	0.056602	0.032249	0.00105101	0.000192339		0.00314986	0.00168698
12.6	Line_7_04	11.9436	47.9799	0	0.126269	0.0375851	0.0744366	0.00157373	0.0692852	0	0	39.614	0	0	0	0.051909	0.0256041	0.000810841	0	0	0.00340845	0.00205635	0	0.0672546	0	0.00225558	8.0707e-05		11.9436	47.9799		0.126269	0.0375851	0.0744366	0.00157373	0.0692852			39.614				0.051909	0.0256041	0.000810841			0.00340845	0.00205635
12.65	Line_7_05	11.9505	47.9713	0	0.0910133	0.0298269	0.0599359	0.00158483	0.0648174	0	0	39.6947	0	0	0	0.0428714	0.017296	0.000881861	0	8.39412e-05	0.0028777	0.00176811	0	0.0686701	0	0.00188151	0		11.9505	47.9713		0.0910133	0.0298269	0.0599359	0.00158483	0.0648174			39.6947				0.0428714	0.017296	0.000881861		8.39412e-05	0.0028777	0.00176811
12.7	Line_7_06	11.9409	47.9875	0	0.10657	0.0280789	0.0721767	0.00191902	0.0934617	0	0	39.6368	0.00527912	0.000313325	0	0.033654	0.0117769	0.00211231	0	0.000481376	0.00311649	0.001574	0	0.0691796	0	0.00452507	0.000535368		11.9409	47.9875		0.10657	0.0280789	0.0721767	0.00191902	0.0934617			39.6368	0.00527912	0.000313325		0.033654	0.0117769	0.00211231		0.000481376	0.00311649	0.001574
12.75	Line_7_07	11.9307	47.9902	0	0.0902117	0.0248262	0.0761072	0.00118595	0.11897	0	0	39.6296	0.0151663	0.000364247	0	0.0303717	0.00918739	0.0028625	0	0.000141161	0.00345206	0.00174306	0	0.0695289	0	0.00452156	0.000869166		11.9307	47.9902		0.0902117	0.0248262	0.0761072	0.00118595	0.11897			39.6296	0.0151663	0.000364247		0.0303717	0.00918739	0.0028625		0.000141161	0.00345206	0.00174306
12.8	Line_7_08	11.9112	47.9731	0.0604979	0.0823763	0.0300039	0.0597677	0.00176817	0.144953	0.000309189	0	39.5769	0.0371705	0	0.00034541	0.0316033	0.00736961	0.00352027	0	0.000134701	0.00408106	0.00156164	0	0.0704758	0	0.00178517	0.00115738		11.9112	47.9731	0.0604979	0.0823763	0.0300039	0.0597677	0.00176817	0.144953	0.000309189		39.5769	0.0371705		0.00034541	0.0316033	0.00736961	0.00352027		0.000134701	0.00408106	0.00156164
12.85	Line_7_09	11.8869	47.923	0.180202	0.0931987	0.0312038	0.0577109	0.00169803	0.143572	0.0294096	0	39.4782	0.0477848	0	0.000198348	0.035774	0.00838767	0.00431179	0	0.000738483	0.00479663	0.00158943	0	0.0698592	0	0	0.00145751		11.8869	47.923	0.180202	0.0931987	0.0312038	0.0577109	0.00169803	0.143572	0.0294096		39.4782	0.0477848		0.000198348	0.035774	0.00838767	0.00431179		0.000738483	0.00479663	0.00158943
12.9	Line_7_10	11.9083	47.9178	0.0772426	0.0646251	0.0290675	0.0581484	0.00185615	0.109946	0.0606008	0.00219759	39.5966	0.0389448	0	0.000140184	0.0414473	0.00957863	0.00392385	0	0	0.00557978	0.00223455	0	0.0699187	0	0	0.00179976		11.9083	47.9178	0.0772426	0.0646251	0.0290675	0.0581484	0.00185615	0.109946	0.0606008	0.00219759	39.5966	0.0389448		0.000140184	0.0414473	0.00957863	0.00392385			0.00557978	0.00223455
12.95	Line_7_11	11.8904	47.8862	0.175435	0.0629078	0.0251668	0.068911	0.00193905	0.113602	0.0663955	0.00442933	39.54	0.0181612	0	0.000536868	0.0504045	0.013823	0.00283732	0	6.32316e-05	0.00560516	0.00206914	0	0.0697964	0	0	0.00123256		11.8904	47.8862	0.175435	0.0629078	0.0251668	0.068911	0.00193905	0.113602	0.0663955	0.00442933	39.54	0.0181612		0.000536868	0.0504045	0.013823	0.00283732		6.32316e-05	0.00560516	0.00206914
13	Line_7_12	11.8893	47.8933	0.183317	0.143096	0.0341094	0.0776515	0.00137729	0.0978974	0.0713695	0.0172258	39.4057	0.0277688	0	0.000327067	0.0611175	0.020893	0.00134673	0	0.00014501	0.00528576	0.00173756	0	0.0665402	0	0	0.00048549		11.8893	47.8933	0.183317	0.143096	0.0341094	0.0776515	0.00137729	0.0978974	0.0713695	0.0172258	39.4057	0.0277688		0.000327067	0.0611175	0.020893	0.00134673		0.00014501	0.00528576	0.00173756
13.05	Line_7_13	11.8956	47.9051	0.121175	0.0966777	0.0320303	0.0782039	0.00128421	0.0951058	0.0475877	0.0140816	39.5042	0.0460418	0	0.000126969	0.0681306	0.0220338	0.000636155	0	0.00120003	0.00467348	0.00128533	0	0.0637749	0	0	0.00104736		11.8956	47.9051	0.121175	0.0966777	0.0320303	0.0782039	0.00128421	0.0951058	0.0475877	0.0140816	39.5042	0.0460418		0.000126969	0.0681306	0.0220338	0.000636155		0.00120003	0.00467348	0.00128533
13.1	Line_7_14	11.9101	47.936	0.0541819	0.0852086	0.0305863	0.0603807	0.00131628	0.104295	0.0228456	0.00490878	39.5722	0.0530018	0	0.000152503	0.0732193	0.022283	0.00070194	0	0.000644452	0.00400263	0.00148929	0	0.0622813	0	0	0.000274934		11.9101	47.936	0.0541819	0.0852086	0.0305863	0.0603807	0.00131628	0.104295	0.0228456	0.00490878	39.5722	0.0530018		0.000152503	0.0732193	0.022283	0.00070194		0.000644452	0.00400263	0.00148929
13.15	Line_7_15	11.9248	47.9786	0	0.127344	0.0273411	0.0638759	0.00124893	0.1061	0	0	39.5521	0.0543667	0	0.000428925	0.0723582	0.0200404	0.00136847	7.4116e-05	0.00102646	0.00433428	0.00200355	0	0.0616226	0	0	0.000938578		11.9248	47.9786		0.127344	0.0273411	0.0638759	0.00124893	0.1061			39.5521	0.0543667		0.000428925	0.0723582	0.0200404	0.00136847	7.4116e-05	0.00102646	0.00433428	0.00200355
13.2	Line_7_16	11.9163	47.9749	0	0.08097	0.0300576	0.0803362	0.00108767	0.118189	0	0	39.6	0.047502	0	0.00070774	0.061574	0.0170264	0.00126273	4.28755e-05	0.000358408	0.00508305	0.00194571	0	0.0621458	0	0	0.000506367		11.9163	47.9749		0.08097	0.0300576	0.0803362	0.00108767	0.118189			39.6	0.047502		0.00070774	0.061574	0.0170264	0.00126273	4.28755e-05	0.000358408	0.00508305	0.00194571
13.25	Line_7_17	11.9251	47.9874	0	0.114661	0.0309319	0.065911	0.00131003	0.118179	0	0	39.5735	0.0420026	0	0	0.0550651	0.0134109	0.00136945	0	0	0.00552964	0.00202632	0	0.0630954	0	0	0.000551303		11.9251	47.9874		0.114661	0.0309319	0.065911	0.00131003	0.118179			39.5735	0.0420026			0.0550651	0.0134109	0.00136945			0.00552964	0.00202632
13.3	Line_7_18	11.9249	47.9731	0	0.0658278	0.0287229	0.0698389	0.000913447	0.113264	0	0	39.653	0.0327397	0	0	0.0506854	0.0116813	0.00213685	0.000275688	0	0.00537105	0.00253668	0	0.0636373	0	0	0.00136466		11.9249	47.9731		0.0658278	0.0287229	0.0698389	0.000913447	0.113264			39.653	0.0327397			0.0506854	0.0116813	0.00213685	0.000275688		0.00537105	0.00253668
13.35	Line_7_19	11.9268	47.976	0.0760464	0.145456	0.034065	0.0725322	0.00142982	0.0992193	0	0	39.5282	0.00610557	0	0	0.0482675	0.0110294	0.00134796	0	0.000115756	0.0054319	0.00220173	0	0.063596	0	0.00159229	0.000570259		11.9268	47.976	0.0760464	0.145456	0.034065	0.0725322	0.00142982	0.0992193			39.5282	0.00610557			0.0482675	0.0110294	0.00134796		0.000115756	0.0054319	0.00220173
13.4	Line_7_20	11.9375	47.9741	0	0.095336	0.0359398	0.0707205	0.000448967	0.089898	0	0	39.6466	0	0	0	0.0478291	0.0107873	0.00181562	0	0.000379628	0.00504531	0.00189938	0	0.0630799	0	0.0184475	0.000162079		11.9375	47.9741		0.095336	0.0359398	0.0707205	0.000448967	0.089898			39.6466				0.0478291	0.0107873	0.00181562		0.000379628	0.00504531	0.00189938
13.45	Line_7_21	11.9462	47.9727	0	0.114251	0.0330216	0.054283	0.000475374	0.0785671	0	0	39.6448	0	0	0	0.0509001	0.0128089	0.00231417	0.000754326	0.00102986	0.00433194	0.00173959	0	0.0625952	0	0.0188278	0.000346222		11.9462	47.9727		0.114251	0.0330216	0.054283	0.000475374	0.0785671			39.6448				0.0509001	0.0128089	0.00231417	0.000754326	0.00102986	0.00433194	0.00173959
13.5	Line_7_22	11.9462	47.9707	0	0.104408	0.0286298	0.057789	0.000349118	0.0763596	0	0	39.6608	0	0	0	0.0537364	0.0161835	0.00168896	0	0.00149014	0.00470093	0.00163915	0	0.0631478	0	0.0118501	0.000310476		11.9462	47.9707		0.104408	0.0286298	0.057789	0.000349118	0.0763596			39.6608				0.0537364	0.0161835	0.00168896		0.00149014	0.00470093	0.00163915
13.55	Line_7_23	11.9325	47.9596	0.0123492	0.058589	0.0302208	0.0680738	0.000382529	0.0892689	0	0	39.6908	0.0104357	0	0	0.0563734	0.0169749	0.00171707	0	0.00148383	0.00400733	0.00186344	0	0.0628078	0	0.00228993	0.000254589		11.9325	47.9596	0.0123492	0.058589	0.0302208	0.0680738	0.000382529	0.0892689			39.6908	0.0104357			0.0563734	0.0169749	0.00171707		0.00148383	0.00400733	0.00186344
13.6	Line_7_24	11.9192	47.9382	0.0785439	0.0607943	0.0263422	0.0811231	0.000782788	0.0806027	0	0	39.6426	0.0260292	0	3.03051e-05	0.0577667	0.0158165	0.00204109	0	0.00140678	0.00370624	0.00181242	0	0.0627025	0	0	0.00047664		11.9192	47.9382	0.0785439	0.0607943	0.0263422	0.0811231	0.000782788	0.0806027			39.6426	0.0260292		3.03051e-05	0.0577667	0.0158165	0.00204109		0.00140678	0.00370624	0.00181242
13.65	Line_7_25	11.9431	47.9642	0	0.0896926	0.0321065	0.0539602	0.0016536	0.0703512	0	0	39.6743	0.0227256	0	0.000134119	0.0587303	0.0148677	0.00293788	0	0.00216413	0.00336935	0.00189742	0	0.0638577	0	0	0		11.9431	47.9642		0.0896926	0.0321065	0.0539602	0.0016536	0.0703512			39.6743	0.0227256		0.000134119	0.0587303	0.0148677	0.00293788		0.00216413	0.00336935	0.00189742
13.7	Line_7_26	11.9408	47.9678	0	0.0884999	0.0329195	0.0767147	0.00179504	0.0678973	0	0	39.6685	0.00557235	0	5.5767e-05	0.0585099	0.0184731	0.00287217	0.000227721	0.000497877	0.00300599	0.0019343	0	0.063905	0	0	0		11.9408	47.9678		0.0884999	0.0329195	0.0767147	0.00179504	0.0678973			39.6685	0.00557235		5.5767e-05	0.0585099	0.0184731	0.00287217	0.000227721	0.000497877	0.00300599	0.0019343
13.75	Line_7_27	11.9306	47.9689	0	0.0751847	0.0326927	0.0909359	0.00110432	0.0859333	0	0	39.6562	0.00138466	0	0.000556625	0.0621102	0.0220604	0.00358259	0	0	0.00260844	0.00161207	0	0.064176	0	0	0.000412147		11.9306	47.9689		0.0751847	0.0326927	0.0909359	0.00110432	0.0859333			39.6562	0.00138466		0.000556625	0.0621102	0.0220604	0.00358259			0.00260844	0.00161207
13.8	Line_7_28	11.9187	47.9764	0	0.0790581	0.0319573	0.107975	0.00125421	0.105942	0	0	39.6108	0.00806263	0	0.000512933	0.0607054	0.0262831	0.00331637	0	5.01507e-06	0.00388694	0.00142488	0	0.0626109	0	0	0.0010723		11.9187	47.9764		0.0790581	0.0319573	0.107975	0.00125421	0.105942			39.6108	0.00806263		0.000512933	0.0607054	0.0262831	0.00331637		5.01507e-06	0.00388694	0.00142488
13.85	Line_7_29	11.9151	47.9728	0.0106787	0.0788407	0.0257218	0.102953	0.00170369	0.114778	0	0	39.5994	0.0122194	0	0.000280205	0.0599348	0.0293478	0.00498118	0	0.00118318	0.00494248	0.00137789	0	0.0627975	0	0	0.000862389		11.9151	47.9728	0.0106787	0.0788407	0.0257218	0.102953	0.00170369	0.114778			39.5994	0.0122194		0.000280205	0.0599348	0.0293478	0.00498118		0.00118318	0.00494248	0.00137789
13.9	Line_7_30	11.9046	47.9768	0.0236426	0.098795	0.02882	0.127783	0.00195885	0.117504	0	0	39.5316	0.0188478	0	0.000729686	0.0611867	0.0316813	0.00467517	0	0.00123315	0.00554975	0.00193375	0	0.0623354	0	0	0.00029672		11.9046	47.9768	0.0236426	0.098795	0.02882	0.127783	0.00195885	0.117504			39.5316	0.0188478		0.000729686	0.0611867	0.0316813	0.00467517		0.00123315	0.00554975	0.00193375
13.95	Line_7_31	11.9115	47.9791	0	0.0985094	0.0302803	0.127087	0.00152385	0.106073	0	0	39.5557	0.0142169	0	0.000262744	0.0679019	0.0350799	0.00295377	0	0.000656425	0.00513598	0.00166702	0	0.0611174	0	0	0.0012382		11.9115	47.9791		0.0985094	0.0302803	0.127087	0.00152385	0.106073			39.5557	0.0142169		0.000262744	0.0679019	0.0350799	0.00295377		0.000656425	0.00513598	0.00166702
14	Line_7_32	11.9131	47.9907	0	0.129155	0.0314474	0.117041	0.00159939	0.11995	0	0	39.5117	0	0	0	0.0778456	0.0385178	0.00173538	0	0.000379899	0.00490959	0.00160581	0	0.058449	0	0.000220591	0.00160664		11.9131	47.9907		0.129155	0.0314474	0.117041	0.00159939	0.11995			39.5117				0.0778456	0.0385178	0.00173538		0.000379899	0.00490959	0.00160581
14.05	Line_7_33	11.9061	47.9908	0	0.114491	0.0290157	0.0924445	0.00190606	0.15345	0	0	39.5129	0.00771987	0	0	0.0824375	0.0419157	0.00132109	0	1.28739e-05	0.00438492	0.00144967	0	0.0574667	0	0.00211451	2.17578e-05		11.9061	47.9908		0.114491	0.0290157	0.0924445	0.00190606	0.15345			39.5129	0.00771987			0.0824375	0.0419157	0.00132109		1.28739e-05	0.00438492	0.00144967
14.1	Line_7_34	11.904	47.9776	0	0.0762261	0.0294501	0.0650488	0.00127843	0.167261	0	0	39.5691	0.018319	0	9.16337e-05	0.0809847	0.0399704	0.0021464	0	1.1135e-05	0.00395787	0.00151039	0	0.0572596	0	0.00524995	0.000477508		11.904	47.9776		0.0762261	0.0294501	0.0650488	0.00127843	0.167261			39.5691	0.018319		9.16337e-05	0.0809847	0.0399704	0.0021464		1.1135e-05	0.00395787	0.00151039
14.15	Line_7_35	11.8927	48.0024	0	0.116497	0.034605	0.102825	0.00139139	0.187867	0	0	39.4653	0.00861383	0	0.000109155	0.0764757	0.0367188	0.00288152	0	0.000238971	0.00374243	0.00120628	0	0.0566649	0	0.00968157	7.16641e-05		11.8927	48.0024		0.116497	0.034605	0.102825	0.00139139	0.187867			39.4653	0.00861383		0.000109155	0.0764757	0.0367188	0.00288152		0.000238971	0.00374243	0.00120628
14.2	Line_7_36	11.8936	48.0163	0.0258585	0.186606	0.0331595	0.0905146	0.00141229	0.191698	0	0	39.3516	0.027445	0	0.00044939	0.0720384	0.0369008	0.00322359	0	0.00144353	0.00397862	0.00147273	0	0.0588152	0	0.00236007	0.00111172		11.8936	48.0163	0.0258585	0.186606	0.0331595	0.0905146	0.00141229	0.191698			39.3516	0.027445		0.00044939	0.0720384	0.0369008	0.00322359		0.00144353	0.00397862	0.00147273
14.25	Line_7_37	11.894	47.9977	0	0.115197	0.0322552	0.0751601	0.00167264	0.190138	0	0	39.4696	0.0370871	0	0.000867352	0.0730243	0.042452	0.00217047	0	0.000888346	0.00434407	0.00159766	0	0.0614502	0	0	0.000379489		11.894	47.9977		0.115197	0.0322552	0.0751601	0.00167264	0.190138			39.4696	0.0370871		0.000867352	0.0730243	0.042452	0.00217047		0.000888346	0.00434407	0.00159766
14.3	Line_7_38	11.8938	47.985	0.0419797	0.151221	0.0309599	0.0767106	0.00149519	0.167774	0	0	39.41	0.0355496	0	0.00103386	0.0815919	0.0544531	0.00140367	0	0.000308479	0.00447928	0.00163124	0	0.0604293	0	0	0.000177664		11.8938	47.985	0.0419797	0.151221	0.0309599	0.0767106	0.00149519	0.167774			39.41	0.0355496		0.00103386	0.0815919	0.0544531	0.00140367		0.000308479	0.00447928	0.00163124
14.35	Line_7_39	11.9077	47.9811	0	0.139263	0.0318427	0.0647383	0.00115646	0.149583	0	0	39.4765	0.0136549	0	0.00110459	0.0984021	0.0663011	0.001213	0	0.000337197	0.00521248	0.00186265	0	0.0597185	0	0	0.000294597		11.9077	47.9811		0.139263	0.0318427	0.0647383	0.00115646	0.149583			39.4765	0.0136549		0.00110459	0.0984021	0.0663011	0.001213		0.000337197	0.00521248	0.00186265
14.4	Line_7_40	11.9024	47.9763	0	0.171308	0.0341326	0.0865012	0.00127725	0.136347	0	0	39.4068	0.00516056	0	0.000766502	0.124227	0.0817946	0.00113082	0	0.000476284	0.00561987	0.00142587	0	0.0578481	0	0.00606514	0.000303382		11.9024	47.9763		0.171308	0.0341326	0.0865012	0.00127725	0.136347			39.4068	0.00516056		0.000766502	0.124227	0.0817946	0.00113082		0.000476284	0.00561987	0.00142587
14.45	Line_7_41	11.9035	47.9807	0	0.207335	0.032103	0.0679289	0.00147482	0.140782	0	0	39.3511	0.0221622	0	0.00039687	0.136684	0.0865781	0.00131733	0	0.000649548	0.00501172	0.0017846	0	0.0573032	0	0.00248507	0.000742131		11.9035	47.9807		0.207335	0.032103	0.0679289	0.00147482	0.140782			39.3511	0.0221622		0.00039687	0.136684	0.0865781	0.00131733		0.000649548	0.00501172	0.0017846
14.5	Line_7_42	11.9016	47.954	0	0.106022	0.0293613	0.0721033	0.0011981	0.13466	0	0	39.5107	0.0166272	0	0.000683904	0.128199	0.0731585	0.00183648	0	0.00155342	0.00427317	0.00214028	0	0.059798	0	0.00172326	0.000309433		11.9016	47.954		0.106022	0.0293613	0.0721033	0.0011981	0.13466			39.5107	0.0166272		0.000683904	0.128199	0.0731585	0.00183648		0.00155342	0.00427317	0.00214028
14.55	Line_7_43	11.9002	47.9892	0	0.160027	0.0298727	0.08569	0.00159754	0.154057	0	0	39.4159	0.0315248	0	0.000245124	0.105316	0.0557525	0.0012873	0	0.0001917	0.00378454	0.00226414	0	0.0625845	0	0	0.000427885		11.9002	47.9892		0.160027	0.0298727	0.08569	0.00159754	0.154057			39.4159	0.0315248		0.000245124	0.105316	0.0557525	0.0012873		0.0001917	0.00378454	0.00226414
14.6	Line_7_44	11.9139	47.9941	0	0.136825	0.0286327	0.0761916	0.00127992	0.151324	0	0	39.4985	0.00266788	0	6.20383e-05	0.0829008	0.03799	0.00122318	0.000529173	0	0.00270215	0.00243511	0	0.0654342	0	0.00330353	1.63808e-05		11.9139	47.9941		0.136825	0.0286327	0.0761916	0.00127992	0.151324			39.4985	0.00266788		6.20383e-05	0.0829008	0.03799	0.00122318	0.000529173		0.00270215	0.00243511
14.65	Line_7_45	11.9277	48.0247	0	0.207984	0.0285164	0.0654042	0.00196312	0.152187	0	0	39.4268	0	0	0.000320871	0.0590686	0.0234134	0.00230413	0	0	0.00309322	0.00167892	0	0.0663197	0	0.00767793	0.000841119		11.9277	48.0247		0.207984	0.0285164	0.0654042	0.00196312	0.152187			39.4268			0.000320871	0.0590686	0.0234134	0.00230413			0.00309322	0.00167892
14.7	Line_7_46	11.9269	48.0354	0	0.213834	0.0319228	0.0592259	0.00187695	0.169427	0.00442047	0	39.4142	0	0	0.00112242	0.0450488	0.0145228	0.0046245	0.000799288	0.00049917	0.00303793	0.00158747	0	0.0667749	0	0.0033304	0.00137199		11.9269	48.0354		0.213834	0.0319228	0.0592259	0.00187695	0.169427	0.00442047		39.4142			0.00112242	0.0450488	0.0145228	0.0046245	0.000799288	0.00049917	0.00303793	0.00158747
14.75	Line_7_47	11.9244	48.0479	0	0.215953	0.0308141	0.0706139	0.00141401	0.17896	0	0	39.4025	0.00254654	0	0.00131246	0.0372828	0.00921328	0.00528118	0.000443179	0	0.00321778	0.00117238	0	0.066793	0	0	0.00016704		11.9244	48.0479		0.215953	0.0308141	0.0706139	0.00141401	0.17896			39.4025	0.00254654		0.00131246	0.0372828	0.00921328	0.00528118	0.000443179		0.00321778	0.00117238
14.8	Line_7_48	11.9085	48.0194	0.103828	0.242239	0.0350795	0.0693564	0.00114056	0.169378	0	0	39.3061	0.0173802	0	0.00111347	0.0381146	0.0119493	0.00447013	0.000149066	0	0.00378606	0.00124584	0	0.0666677	0	0	0.000138483		11.9085	48.0194	0.103828	0.242239	0.0350795	0.0693564	0.00114056	0.169378			39.3061	0.0173802		0.00111347	0.0381146	0.0119493	0.00447013	0.000149066		0.00378606	0.00124584
14.85	Line_7_49	11.9181	48.031	0	0.188339	0.0346062	0.0849177	0.000331371	0.163309	0	0	39.4267	0.0175369	0	0.00142587	0.0421313	0.0129155	0.00374216	0.00100547	0	0.00385251	0.00183854	0	0.0674749	0	0	0.00074733		11.9181	48.031		0.188339	0.0346062	0.0849177	0.000331371	0.163309			39.4267	0.0175369		0.00142587	0.0421313	0.0129155	0.00374216	0.00100547		0.00385251	0.00183854
14.9	Line_7_50	11.9344	48.0189	0	0.178737	0.0245873	0.0648566	0.00050887	0.136718	0	0	39.4968	0.00817361	0	0.0010659	0.0448481	0.0126658	0.0027998	0.000422559	0	0.00385791	0.0014944	0	0.067764	0	0	0.00129526		11.9344	48.0189		0.178737	0.0245873	0.0648566	0.00050887	0.136718			39.4968	0.00817361		0.0010659	0.0448481	0.0126658	0.0027998	0.000422559		0.00385791	0.0014944
14.95	Line_7_51	11.9311	48.0267	0	0.201424	0.0315493	0.070106	0.00060027	0.140218	0	0	39.4481	0.0141515	0	0.000304658	0.045641	0.0117586	0.0025738	0.000475465	0	0.00396646	0.00186432	0	0.0683645	0	0	0.00107459		11.9311	48.0267		0.201424	0.0315493	0.070106	0.00060027	0.140218			39.4481	0.0141515		0.000304658	0.045641	0.0117586	0.0025738	0.000475465		0.00396646	0.00186432
15	Line_7_52	11.9259	48.0302	0	0.204419	0.0350331	0.0719004	0.000706537	0.149007	0	0	39.4259	0.0245095	0	0.000208337	0.0442761	0.0104477	0.00276151	4.99383e-05	0	0.00454358	0.00165766	0	0.0680549	0	0	0.000401995		11.9259	48.0302		0.204419	0.0350331	0.0719004	0.000706537	0.149007			39.4259	0.0245095		0.000208337	0.0442761	0.0104477	0.00276151	4.99383e-05		0.00454358	0.00165766
15.05	Line_7_53	11.9172	48.0102	0.0392752	0.171636	0.0249488	0.0788593	0.00110135	0.152699	0	0	39.4502	0.0164568	0	0.000433123	0.0453168	0.0130416	0.00222341	0	0.000102951	0.00481066	0.00164306	0	0.0693252	0	0	0.000626418		11.9172	48.0102	0.0392752	0.171636	0.0249488	0.0788593	0.00110135	0.152699			39.4502	0.0164568		0.000433123	0.0453168	0.0130416	0.00222341		0.000102951	0.00481066	0.00164306
15.1	Line_7_54	11.9136	48.0242	0.000194979	0.187858	0.0326065	0.083543	0.00141382	0.164301	0	0	39.4119	0.0202979	0	0	0.0487765	0.0330005	0.00194217	0	9.35914e-05	0.00536676	0.00208418	0	0.068323	0	0	0.000446822		11.9136	48.0242	0.000194979	0.187858	0.0326065	0.083543	0.00141382	0.164301			39.4119	0.0202979			0.0487765	0.0330005	0.00194217		9.35914e-05	0.00536676	0.00208418
15.15	Line_7_55	11.9021	48.0097	0	0.194692	0.0298381	0.0743293	0.00121566	0.174365	0	0	39.3624	0.0241115	0	0.000141715	0.0647218	0.0851787	0.00133546	0	5.31821e-05	0.00506154	0.00221618	0	0.068137	0	0	0.000385697		11.9021	48.0097		0.194692	0.0298381	0.0743293	0.00121566	0.174365			39.3624	0.0241115		0.000141715	0.0647218	0.0851787	0.00133546		5.31821e-05	0.00506154	0.00221618
15.2	Line_7_56	11.8743	47.9778	0.0712291	0.257003	0.0326445	0.0455749	0.000966217	0.197566	0	0	39.1674	0.0264967	0	0	0.0928955	0.179362	0.000819293	0	0.00011021	0.00530837	0.00242959	0	0.0668095	0	0	0.00128905		11.8743	47.9778	0.0712291	0.257003	0.0326445	0.0455749	0.000966217	0.197566			39.1674	0.0264967			0.0928955	0.179362	0.000819293		0.00011021	0.00530837	0.00242959
15.25	Line_7_57	11.8543	47.9724	0	0.243179	0.032055	0.0846228	0.000826713	0.204703	0	0	39.125	0.0287795	0	0	0.118278	0.262656	0.000967539	0	0.00033625	0.00545127	0.00183202	0	0.0637942	0	0	0.000830629		11.8543	47.9724		0.243179	0.032055	0.0846228	0.000826713	0.204703			39.125	0.0287795			0.118278	0.262656	0.000967539		0.00033625	0.00545127	0.00183202
15.3	Line_7_58	11.846	47.9594	0.023279	0.252365	0.0308963	0.063171	0.00124702	0.218776	0	0	39.0829	0.0281879	0	0	0.127357	0.294813	0.000910395	0	3.5567e-05	0.00572939	0.00169432	0	0.0617309	0	0	0.00147992		11.846	47.9594	0.023279	0.252365	0.0308963	0.063171	0.00124702	0.218776			39.0829	0.0281879			0.127357	0.294813	0.000910395		3.5567e-05	0.00572939	0.00169432
15.35	Line_7_59	11.8515	47.9692	0	0.247691	0.0301898	0.0824832	0.000933458	0.208531	0	0	39.1109	0.0259205	0	0.000236997	0.126752	0.275397	0.00339556	0	0.000177975	0.00549098	0.00174648	0	0.0577363	0	0	0.00169804		11.8515	47.9692		0.247691	0.0301898	0.0824832	0.000933458	0.208531			39.1109	0.0259205		0.000236997	0.126752	0.275397	0.00339556		0.000177975	0.00549098	0.00174648
15.4	Line_7_60	11.8581	47.9718	0.0338946	0.25678	0.0326339	0.0646716	0.00162278	0.206891	0	0	39.1196	0.0293706	0	0	0.119189	0.23853	0.00329687	0	0	0.00539585	0.00145037	0	0.0539574	0	0	0.00282947		11.8581	47.9718	0.0338946	0.25678	0.0326339	0.0646716	0.00162278	0.206891			39.1196	0.0293706			0.119189	0.23853	0.00329687			0.00539585	0.00145037
15.45	Line_7_61	11.8813	48.0147	0	0.287086	0.0328518	0.0603051	0.00157768	0.211686	0	0	39.1476	0.0167585	0	0	0.107282	0.172437	0.00416888	0.000372473	0	0.00521944	0.00190185	0	0.0527221	0	0	0.002039		11.8813	48.0147		0.287086	0.0328518	0.0603051	0.00157768	0.211686			39.1476	0.0167585			0.107282	0.172437	0.00416888	0.000372473		0.00521944	0.00190185
15.5	Line_7_62	11.8827	48.0042	0.0476149	0.246317	0.0308958	0.0635647	0.00119338	0.207086	0	0	39.2188	0.0170547	0	0.000377657	0.0991159	0.114007	0.00424567	0	0	0.00473451	0.00184383	0	0.054686	0	0	0.00154494		11.8827	48.0042	0.0476149	0.246317	0.0308958	0.0635647	0.00119338	0.207086			39.2188	0.0170547		0.000377657	0.0991159	0.114007	0.00424567			0.00473451	0.00184383
15.55	Line_7_63	11.8955	48.0593	0	0.308032	0.036676	0.0866053	0.00152935	0.219249	0	0	39.1581	0.00288845	0	0.000555549	0.0907	0.0732467	0.00307445	1.65584e-05	0	0.0046192	0.00133633	0	0.0579115	0	0	0.000612974		11.8955	48.0593		0.308032	0.036676	0.0866053	0.00152935	0.219249			39.1581	0.00288845		0.000555549	0.0907	0.0732467	0.00307445	1.65584e-05		0.0046192	0.00133633
15.6	Line_7_64	11.8901	48.0457	0.00830515	0.255965	0.0350396	0.0842688	0.00192129	0.226723	0	0	39.2247	0.0131422	0	0.000420902	0.0892455	0.0522322	0.00384611	0	0.000171579	0.00443468	0.00145648	0	0.0611613	0	0	0.0011412		11.8901	48.0457	0.00830515	0.255965	0.0350396	0.0842688	0.00192129	0.226723			39.2247	0.0131422		0.000420902	0.0892455	0.0522322	0.00384611		0.000171579	0.00443468	0.00145648
15.65	Line_7_65	11.8802	48.0166	0.043506	0.184327	0.0319012	0.0949801	0.00173013	0.223552	0	0	39.3087	0.0107484	0	9.31253e-05	0.088256	0.0425533	0.00239251	0	6.58e-05	0.00451176	0.00180616	0	0.0635362	0	0	0.00054997		11.8802	48.0166	0.043506	0.184327	0.0319012	0.0949801	0.00173013	0.223552			39.3087	0.0107484		9.31253e-05	0.088256	0.0425533	0.00239251		6.58e-05	0.00451176	0.00180616
15.7	Line_7_66	11.8984	48.0336	0	0.208964	0.0313157	0.0606866	0.00138032	0.223621	0	0	39.3272	0.0143119	0	0.000630638	0.0865029	0.0367919	0.00288931	0	0.000444784	0.00416913	0.00176053	0	0.0663124	0	0	0.00109097		11.8984	48.0336		0.208964	0.0313157	0.0606866	0.00138032	0.223621			39.3272	0.0143119		0.000630638	0.0865029	0.0367919	0.00288931		0.000444784	0.00416913	0.00176053
15.75	Line_7_67	11.9041	48.0306	0	0.204786	0.0294601	0.0616534	0.00172133	0.207084	0	0	39.3524	0.0187249	0	0.000339684	0.0793054	0.033074	0.00259769	0	0.000204022	0.00416022	0.00140638	0	0.0679306	0	0	0.000435292		11.9041	48.0306		0.204786	0.0294601	0.0616534	0.00172133	0.207084			39.3524	0.0187249		0.000339684	0.0793054	0.033074	0.00259769		0.000204022	0.00416022	0.00140638
15.8	Line_7_68	11.8879	47.9893	0.132055	0.196965	0.0292544	0.0686794	0.00139007	0.194784	0	0	39.3111	0.00496809	0	0.000481891	0.0744838	0.0307508	0.00279961	0	0.000271663	0.00461095	0.00152165	0	0.0682821	0	0	0.000379641		11.8879	47.9893	0.132055	0.196965	0.0292544	0.0686794	0.00139007	0.194784			39.3111	0.00496809		0.000481891	0.0744838	0.0307508	0.00279961		0.000271663	0.00461095	0.00152165
[truncated: 63 more columns]

## Sheet: M4 Trecon
MAX		0.00899779	0.000823983	-12.7201	18.3351	49.8937	35.7377	19.4304	11.1563	54.8752	55.1216	32.1667	-29.751	4.19992	-15.0009				-1.1145			20.892			Hays and Grossman, 1991
MIN		0.000638152	0.000648355	-149.625	1.20577	4.21538	-5.37283	1.81165	-3.52601	1.25284	-3.93563	2.04748	-42.7491	3.25461	-26.4278				-4.3479			6.12494			23.1445
MEAN		0.00425538	0.000763621	-62.9427	6.83494	19.2265	8.13719	7.60165	1.29899	18.8746	33.4569	21.1177	-33.9277	3.89617	-18.6727				-2.0394			10.2069			9.08869
TOP CYCLE		0.00609136	0.000818644	-47.0777	8.77966	24.4124	12.8045	9.60194	2.9659	24.9624	40.3006	24.608	-30.0848	4.17565	-15.2943						Dw	-2.8	0.01		12.8888
BOTTOM CYCLE		0.00242478	0.000697818	-88.9473	3.68719	10.8325	0.582598	4.36397	-1.39907	9.02078	22.2393	15.3967	-37.6364	3.62645	-21.9331										-2.8	0.01			21.0253	57.0675	63.2967
d	years	Mg/Ca	Sr/Ca	Freitas et al., 2005	Surge and Lohmann, 2008	Mouchi et al., 2013	Klein et al., 1996	Vander Putten et al., 2000	Wannamaker et al., 2008	Takesue et al., 2004	Cléroux et al., 2008	Ederfield and Ganssen	Wannamaker et al., 2008	Takesue et al., 2004	Cléroux et al., 2008		D (mm)	years	d18O trim		alpha	T	T-	T+	T	T-	T+		Surge and Lohmann, 2008	Mouchi et al., 2013	Takesue et al., 2004
0	0.25																0	0.25	-1.6985	0.0999518	1.03206	8.6779	8.19352	9.164	11.0431	10.6349	11.4536
0.05	0.304193																0.115328	0.375
0.1	0.358386																0.230657	0.5	-1.4665	0.0999518	1.0323	7.65797	7.17718	8.14045	10.0993	9.69672	10.5043
0.15	0.412579																0.345985	0.625	-1.235	0.0999518	1.03254	6.64779	6.17056	7.1267	9.17051	8.77346	9.56995
0.2	0.466772																0.461314	0.75	-2.213	0.0999518	1.03153	10.9673	10.4748	11.4616	13.182	12.7615	13.6049
0.25	0.520965	0.00526356	0.000764814	-53.717	7.62994	21.3465	10.0452	8.41937	1.98042	21.3633	37.4366	23.1473	-33.4491	3.93097	-18.252		0.576642	0.875	-1.88	0.0999518	1.03187	9.48118	8.99395	9.97013	11.7904	11.3778	12.2053		24.6878	66.834	74.7617
0.3	0.575158	0.00643603	0.000770697	-44.5759	9.25838	25.689	13.9534	10.0943	3.37623	26.461	41.3799	25.1584	-33.0814	3.95771	-17.9287		0.691971	1	-1.4705	0.0999518	1.03229	7.67549	7.19464	8.15803	10.1155	9.71279	10.5206		30.1159	81.309	91.7541
0.35	0.629351	0.00521955	0.00076566	-54.0987	7.56881	21.1835	9.89849	8.3565	1.92803	21.1719	37.272	23.0634	-33.3962	3.93482	-18.2055		0.807299	1.33	-1.9885	0.0999518	1.03176	9.96363	9.47469	10.4543	12.2409	11.8258	12.6584		24.484	66.2907	74.1239
0.4	0.683544	0.00690799	0.000774956	-41.3592	9.91388	27.437	15.5266	10.7686	3.93809	28.513	42.7675	25.8661	-32.8153	3.97707	-17.6947		0.922628	1.66	-1.478	0.0999518	1.03229	7.70834	7.22738	8.191	10.1458	9.74292	10.5511		32.3009	87.1357	98.5941
0.45	0.737737	0.00507895	0.000772252	-55.3398	7.37354	20.6628	9.42983	8.15564	1.76065	20.5607	36.7366	22.7903	-32.9842	3.96478	-17.8433		1.03796	2	-1.1145	0.0999518	1.03266	6.12494	5.64954	6.60201	8.69213	8.29797	9.08869		23.8331	64.5549	72.0862
0.5	0.79193	0.00693951	0.000780853	-41.1523	9.95765	27.5537	15.6317	10.8136	3.97561	28.65	42.8567	25.9116	-32.4467	4.00388	-17.3707		1.15328	2.2	-2.332	0.0999518	1.0314	11.5023	11.0079	11.9985	13.6858	13.2624	14.1116		32.4468	87.5248	99.0509
0.55	0.846123	0.00328526	0.000780024	-75.1426	4.8823	14.0195	3.45085	5.59322	-0.374695	12.762	28.1942	18.4337	-32.4985	4.00011	-17.4162		1.26861	2.4	-2.6365	0.0999518	1.03109	12.8808	12.3814	13.3819	14.9903	14.5597	15.4234		15.529	42.4106	46.0907
0.6	0.900316	0.0056028	0.000775836	-50.8779	8.10111	22.603	11.176	8.904	2.38429	22.8383	38.6613	23.7719	-32.7602	3.98107	-17.6464		1.38394	2.6	-1.797	0.0999518	1.03196	9.11325	8.62733	9.6009	11.4476	11.0371	11.8606		26.2583	71.0222	79.6783
0.65	0.954509	0.00391152	0.000767911	-67.2116	5.75211	16.339	5.5384	6.48788	0.370855	15.4849	31.6154	20.1785	-33.2556	3.94505	-18.0818		1.49927	2.8	-1.9555	0.0999518	1.03179	9.81671	9.32829	10.3069	12.1036	11.6892	12.5203		18.4283	50.1422	55.1669
0.7	1.02297	0.00647052	0.000774807	-44.3329	9.30628	25.8167	14.0684	10.1436	3.41729	26.611	41.4847	25.2118	-32.8245	3.9764	-17.7029		1.6146	3	-1.2065	0.0999518	1.03257	6.52395	6.04715	7.00242	9.05705	8.66068	9.45581		30.2756	81.7348	92.2539
0.75	1.16604	0.00328024	0.000761768	-75.212	4.87534	14.0009	3.43414	5.58606	-0.380665	12.7402	28.1643	18.4184	-33.6395	3.91713	-18.4193		1.72993	3.25	-2.049	0.0999518	1.0317	10.2334	9.74349	10.725	12.4933	12.0767	12.9123		15.5057	42.3487	46.018
0.8	1.30911	0.00504842	0.000758419	-55.6139	7.33114	20.5497	9.32807	8.11203	1.72431	20.4279	36.6184	22.73	-33.8488	3.9019	-18.6034		1.84526	3.5	-2.4435	0.0999518	1.03129	12.0055	11.5093	12.5035	14.1609	13.7349	14.5893		23.6918	64.178	71.6438
0.85	1.45218	0.00899779	0.000751928	-29.3456	12.8164	35.177	22.4926	13.754	6.42594	37.5991	47.9498	28.5091	-34.2545	3.8724	-18.96		1.96058	3.75	-1.49	0.0999518	1.03227	7.76093	7.27978	8.24378	10.1943	9.79117	10.5999		41.9759	112.936	128.881
0.9	1.59525	0.0045844	0.000772094	-59.9964	6.68667	18.8311	7.78133	7.44914	1.1719	18.4104	34.7279	21.7659	-32.9941	3.96406	-17.852		2.07591	4	-1.3905	0.0999518	1.03238	7.3255	6.84589	7.80681	9.79298	9.3922	10.1962		21.5435	58.4494	64.9188
0.95	1.7407	0.00685155	0.000785448	-41.7321	9.83548	27.2279	15.3385	10.6879	3.87089	28.2676	42.6066	25.784	-32.1595	4.02476	-17.1183		2.19124	4.2	-1.573	0.0999518	1.03219	8.12522	7.64279	8.60936	10.5309	10.1258	10.9385		32.0396	86.4388	97.776
1	1.8881	0.00798394	0.000799219	-34.7795	11.4083	31.422	19.1131	12.3056	5.21898	33.1911	45.6058	27.3136	-31.2988	4.08736	-16.3616		2.30657	4.4	-1.835	0.0999518	1.03192	9.28158	8.79506	9.76982	11.6043	11.1929	12.0182		37.2821	100.419	114.188
1.05	2.02089	0.00347895	0.000797121	-72.5387	5.15131	14.7368	4.09648	5.86992	-0.144113	13.6041	29.3175	19.0066	-31.43	4.07782	-16.4769		2.4219	4.6	-2.5745	0.0999518	1.03115	12.599	12.1006	13.0991	14.7229	14.2937	15.1545		16.4257	44.8018	48.8978
1.1	2.10759	0.00618796	0.000816315	-46.3625	8.91383	24.7702	13.1265	9.73994	3.0809	25.3824	40.6092	24.7653	-30.2303	4.16507	-15.4222		2.53723	4.8	-1.9635	0.0999518	1.03178	9.85231	9.36377	10.3426	12.1368	11.7223	12.5538		28.9674	78.2464	88.1588
1.15	2.1943	0.00443253	0.000802938	-61.5278	6.47573	18.2686	7.27509	7.23218	0.991103	17.7501	34.0673	21.429	-31.0664	4.10426	-16.1573		2.65255	5	-1.4565	0.0999518	1.03231	7.61417	7.13354	8.0965	10.0589	9.65658	10.4637		20.8404	56.5744	62.7178
1.2	2.28101	0.00457247	0.000792721	-60.1149	6.6701	18.7869	7.74157	7.4321	1.1577	18.3586	34.6768	21.7398	-31.7049	4.05782	-16.7186		2.76788	5.14286	-2.111	0.0999518	1.03163	10.5104	10.0195	11.003	12.7529	12.3349	13.1734		21.4883	58.3021	64.746
1.25	2.36772	0.00666286	0.000781979	-43.0015	9.57342	26.5291	14.7095	10.4184	3.64626	27.4472	42.059	25.5048	-32.3763	4.009	-17.3088		2.88321	5.28571											31.166	84.1094	95.0415
1.3	2.45443	0.00534015	0.000760796	-53.0603	7.73632	21.6302	10.3005	8.52879	2.07161	21.6963	37.7199	23.2918	-33.7002	3.91271	-18.4727		2.99854	5.42857	-2.347	0.0999518	1.03139	11.5699	11.0752	12.0663	13.7495	13.3258	14.1757		25.0424	67.7796	75.8718
1.35	2.54114	0.00424119	0.000759332	-63.5335	6.20998	17.56	6.63729	6.95884	0.763319	16.9182	33.2021	20.9877	-33.7918	3.90605	-18.5532		3.11387	5.57143	-2.341	0.0999518	1.03139	11.5428	11.0483	12.0392	13.724	13.3005	14.15		19.9546	54.2122	59.9448
1.4	2.62785	0.00535687	0.000764405	-52.9182	7.75954	21.6921	10.3562	8.55267	2.09151	21.769	37.7812	23.3231	-33.4747	3.92912	-18.2744		3.2292	5.71429	-2.018	0.0999518	1.03173	10.0951	9.60569	10.5862	12.3639	11.948	12.7821		25.1198	67.9861	76.1141
1.45	2.71456	0.00517965	0.000763832	-54.4475	7.5134	21.0357	9.76549	8.2995	1.88053	20.9985	37.1215	22.9866	-33.5105	3.92651	-18.3059		3.34453	5.85714											24.2993	65.7981	73.5456
1.5	2.80127	0.00422924	0.000769636	-63.6618	6.19339	17.5157	6.59746	6.94177	0.749093	16.8663	33.1467	20.9595	-33.1477	3.95289	-17.987		3.45985	6	-1.85815	0.0839929	1.03189	9.38422	8.96789	9.80181	11.7	11.3536	12.0481		19.8993	54.0647	59.7716
1.55	2.88797	0.00606851	0.000771802	-47.2486	8.74793	24.3278	12.7284	9.5693	2.9387	24.8631	40.2269	24.5704	-33.0124	3.96273	-17.868		3.57518	6.11111	-2.11691	0.0839929	1.03163	10.5368	10.117	10.9579	12.7777	12.4261	13.131		28.4144	76.7717	86.4277
1.6	2.97468	0.00446166	0.000783178	-61.23	6.5162	18.3765	7.37221	7.2738	1.02579	17.8768	34.1957	21.4945	-32.3014	4.01445	-17.243		3.69051	6.22222	-2.01244	0.0839929	1.03173	10.0703	9.65191	10.49	12.3407	11.9912	12.6919		20.9753	56.9341	63.14
1.65	3.07674	0.00553133	0.000802825	-51.4615	8.00185	22.3383	10.9378	8.8019	2.2992	22.5275	38.4096	23.6435	-31.0735	4.10375	-16.1635		3.80584	6.33333	-2.46886	0.0839929	1.03126	12.1202	11.6955	12.5461	14.2694	13.9107	14.6298		25.9275	70.1399	78.6425
1.7	3.18513	0.00431111	0.000792982	-62.7903	6.3071	17.8189	6.87037	7.05873	0.84656	17.2222	33.5227	21.1512	-31.6886	4.05901	-16.7043		3.92117	6.44444	-2.5348	0.0839929	1.03119	12.4189	11.9933	12.8457	14.5522	14.1922	14.9139		20.2783	55.0754	60.9581
1.75	3.29351	0.0057233	0.000765402	-49.9107	8.26847	23.0493	11.5777	9.07614	2.52774	23.3622	39.0786	23.9847	-33.4124	3.93364	-18.2197		4.0365	6.55556	-2.68388	0.0839929	1.03104	13.0965	12.6689	13.5255	15.1953	14.8323	15.56		26.8162	72.5099	81.4246
1.8	3.4019	0.00789992	0.000747385	-35.2604	11.2916	31.1108	18.8331	12.1856	5.11896	32.8258	45.3983	27.2078	-34.5385	3.85175	-19.2096		4.15182	6.66667	-2.29391	0.0839929	1.03144	11.3308	10.9086	11.7544	13.5242	13.169	13.881		36.8932	99.3818	112.97
1.85	3.51028	0.00621867	0.000737542	-46.1375	8.95648	24.884	13.2289	9.78381	3.11746	25.5159	40.7062	24.8148	-35.1536	3.80701	-19.7504		4.26715	6.77778	-1.78921	0.0839929	1.03196	9.07875	8.66335	9.49541	11.4155	11.0706	11.7622		29.1096	78.6255	88.6039
1.9	3.61867	0.00509687	0.000743145	-55.1798	7.39842	20.7291	9.48955	8.18124	1.78198	20.6385	36.8056	22.8255	-34.8034	3.83248	-19.4426		4.38248	6.88889	-1.82376	0.0839929	1.03193	9.23179	8.81592	9.64891	11.558	11.2123	11.9054		23.916	64.7761	72.3459
1.95	3.72706	0.00688643	0.000754535	-41.5013	9.88394	27.3572	15.4548	10.7378	3.91242	28.4193	42.7062	25.8348	-34.0916	3.88425	-18.8168		4.49781	7	-1.91023	0.0839929	1.03184	9.61544	9.19841	10.0337	11.9156	11.5682	12.2647		32.2011	86.8696	98.2817
2	3.83544	0.0062405	0.000751275	-45.9782	8.9868	24.9648	13.3017	9.815	3.14345	25.6109	40.7749	24.8499	-34.2953	3.86943	-18.9959		4.61314	7.125	-1.66996	0.0839929	1.03209	8.55202	8.13821	8.96708	10.9263	10.5837	11.2705		29.2106	78.895	88.9203
2.05	3.94383	0.00156061	0.00076128	-108.978	2.48696	7.63188	-2.29797	3.12944	-2.42785	5.26352	13.5988	10.99	-33.67	3.91491	-18.4462		4.72847	7.25	-2.36069	0.0839929	1.03137	11.6316	11.2085	12.0561	13.8078	13.4513	14.166		7.54449	21.1186	21.0958
2.1	4.04177	0.00289633	0.00076869	-80.8699	4.34212	12.579	2.15443	5.03761	-0.837704	11.071	25.7236	17.1737	-33.2069	3.94859	-18.039		4.8438	7.375	-2.31824	0.0839929	1.03142	11.4403	11.0178	11.8642	13.6274	13.2717	13.9847		13.7284	37.609	40.454
2.15	4.12848	0.00541922	0.000765878	-52.3923	7.84613	21.923	10.5641	8.64174	2.16573	22.0401	38.0081	23.4388	-33.3826	3.93581	-18.1935		4.95912	7.5	-2.10293	0.0839929	1.03164	10.4743	10.0547	10.8952	12.7191	12.3678	13.0721		25.4084	68.7558	77.0176
2.2	4.21519	0.00495201	0.000765198	-56.4904	7.19723	20.1926	9.00669	7.97429	1.60953	20.0087	36.2403	22.5372	-33.4251	3.93272	-18.2309		5.07445	7.625	-2.05194	0.0839929	1.03169	10.2465	9.82759	10.6667	12.5056	12.1553	12.8576		23.2454	62.9877	70.2465
2.25	4.3019	0.00320648	0.000748417	-76.2457	4.77289	13.7277	3.18828	5.48069	-0.468472	12.4195	27.7184	18.191	-34.474	3.85644	-19.1529		5.18978	7.75	-2.19658	0.0839929	1.03154	10.8936	10.4727	11.3158	13.1128	12.7596	13.4677		15.1643	41.4381	44.949
2.3	4.38861	0.00580878	0.000732301	-49.2368	8.38719	23.3659	11.8626	9.19826	2.6295	23.7338	39.3693	24.133	-35.4812	3.78319	-20.0384		5.30511	7.875	-1.51205	0.0839929	1.03225	7.85761	7.44589	8.27057	10.2836	9.94419	10.6247		27.2119	73.5652	82.6635
2.35	4.47532	0.00452568	0.000724677	-60.5824	6.60512	18.6136	7.58561	7.36526	1.102	18.1551	34.4751	21.637	-35.9577	3.74853	-20.4573		5.42044	8	-1.42166	0.0839929	1.03234	7.46171	7.05119	7.87347	9.91841	9.58084	10.2577		21.2717	57.7245	64.0679
2.4	4.56203	0.00417877	0.000740138	-64.2075	6.12329	17.3288	6.42922	6.86966	0.689007	16.6468	32.9113	20.8394	-34.9914	3.81881	-19.6078		5.53577	8.09091	-1.58277	0.0839929	1.03218	8.16819	7.75553	8.58209	10.5707	10.2299	10.9132		19.6656	53.4415	59.0401
2.45	4.64873	0.00499358	0.000756745	-56.1103	7.25498	20.3466	9.14528	8.03369	1.65903	20.1895	36.4042	22.6208	-33.9534	3.8943	-18.6953		5.65109	8.18182	-1.79031	0.0839929	1.03196	9.08363	8.66821	9.5003	11.4201	11.0751	11.7668		23.4379	63.501	70.8491
2.5	4.73544	0.00343649	0.000774562	-73.0969	5.09234	14.5796	3.95495	5.80927	-0.194659	13.4195	29.0767	18.8838	-32.8399	3.97528	-17.7164		5.76642	8.27273	-1.74461	0.0839929	1.03201	8.88155	8.46674	9.29761	11.2322	10.8881	11.578		16.2291	44.2776	48.2824
2.55	4.82215	0.00480986	0.000782829	-57.8142	6.9998	19.6661	8.53286	7.77123	1.44031	19.3907	35.6692	22.2459	-32.3232	4.01286	-17.2621		5.88175	8.36364	-1.95667	0.0839929	1.03179	9.82193	9.40428	10.2409	12.1084	11.7601	12.4585		22.5873	61.2328	68.1864
2.6	4.90886	0.00480272	0.000795707	-57.8817	6.9899	19.6397	8.50908	7.76104	1.43182	19.3597	35.6401	22.2311	-31.5183	4.07139	-16.5546		5.99708	8.45455	-2.0816	0.0839929	1.03166	10.379	9.95962	10.7996	12.6297	12.2788	12.9823		22.5543	61.1448	68.083
2.65	4.99557	0.00140759	0.00080744	-113.668	2.27443	7.06515	-2.80803	2.91084	-2.61001	4.59822	11.5753	9.95806	-30.785	4.12473	-15.9099		6.11241	8.54545	-2.65559	0.0839929	1.03107	12.9676	12.5404	13.3962	15.0729	14.7104	15.437		6.83607	19.2295	18.8781
2.7	5.05877	0.00494191	0.000801764	-56.5832	7.1832	20.1552	8.97302	7.95986	1.59751	19.9648	36.2002	22.5168	-31.1397	4.09893	-16.2218		6.22774	8.63636	-3.12711	0.0839929	1.03058	15.131	14.697	15.5662	17.139	16.7671	17.5127		23.1986	62.863	70.1001
2.75	5.12071	0.00479685	0.000791007	-57.9374	6.98173	19.6179	8.48949	7.75264	1.42482	19.3341	35.6161	22.2189	-31.812	4.05003	-16.8128		6.34307	8.72727	-2.65583	0.0839929	1.03107	12.9687	12.5415	13.3973	15.0739	14.7114	15.4381		22.5271	61.0722	67.9978
2.8	5.18264	0.00413233	0.000779786	-64.7154	6.05879	17.1568	6.27444	6.80333	0.633728	16.4449	32.6922	20.7277	-32.5134	3.99903	-17.4294		6.45839	8.81818	-2.00692	0.0839929	1.03174	10.0457	9.62738	10.4653	12.3177	11.9683	12.6687		19.4506	52.8683	58.3671
2.85	5.24458	0.00187633	0.000755376	-100.603	2.92546	8.80122	-1.24557	3.58047	-2.05199	6.63622	17.2114	12.8324	-34.039	3.88807	-18.7705		6.57372	8.90909	-1.56773	0.0839929	1.03219	8.10207	7.68961	8.51577	10.5095	10.169	10.8517		9.00616	25.0164	25.6714
2.9	5.30651	0.005191	0.00073958	-54.3479	7.52917	21.0778	9.80333	8.31571	1.89405	21.0478	37.1645	23.0085	-35.0263	3.81627	-19.6385		6.68905	9	-1.54377	0.0839929	1.03222	7.9968	7.58466	8.41018	10.4122	10.0722	10.7539		24.3519	65.9383	73.7101
2.95	5.36844	0.00595643	0.000715814	-48.0959	8.59226	23.9127	12.3548	9.40918	2.80527	24.3758	39.8614	24.384	-36.5116	3.70824	-20.9443		6.80438	9.125	-1.68783	0.0839929	1.03207	8.63081	8.21676	9.04611	10.9994	10.6564	11.344		27.8955	75.388	84.8033
3	5.43038	0.00592678	0.000717612	-48.3227	8.55109	23.8029	12.2559	9.36684	2.76998	24.2469	39.7636	24.3341	-36.3993	3.71642	-20.8455		6.91971	9.25	-2.04344	0.0839929	1.0317	10.2086	9.78974	10.6287	12.4701	12.12	12.8219		27.7583	75.022	84.3737
3.05	5.49231	0.00395225	0.0007635	-66.7408	5.80868	16.4898	5.67416	6.54607	0.419343	15.6619	31.8185	20.2821	-33.5313	3.925	-18.3242		7.03504	9.375	-1.97235	0.0839929	1.03178	9.89173	9.47386	10.3109	12.1737	11.825	12.524		18.6169	50.645	55.7572
3.1	5.55425	0.00556889	0.000788527	-51.1539	8.05401	22.4774	11.063	8.85555	2.34391	22.6908	38.5423	23.7112	-31.967	4.03876	-16.949		7.15036	9.5	-1.64831	0.0839929	1.03211	8.45661	8.04308	8.87138	10.8378	10.4957	11.1816		26.1013	70.6035	79.1867
3.15	5.61618	0.00436959	0.000789489	-62.1778	6.38832	18.0355	7.0653	7.14227	0.916177	17.4765	33.7869	21.286	-31.907	4.04313	-16.8962		7.26569	9.625	-2.60274	0.0839929	1.03112	12.7273	12.3008	13.1551	14.8446	14.4833	15.2077		20.549	55.7974	61.8056
3.2	5.67812	0.00520586	0.000796945	-54.218	7.5498	21.1328	9.85286	8.33694	1.91173	21.1124	37.2205	23.0371	-31.441	4.07702	-16.4866		7.38102	9.75	-3.19007	0.0839929	1.03052	15.4224	14.9876	15.8586	17.419	17.0457	17.7939		24.4206	66.1217	73.9255
3.25	5.74005	0.00210141	0.000787557	-95.4533	3.23807	9.63485	-0.495306	3.90201	-1.78404	7.61482	19.4327	13.9653	-32.0277	4.03435	-17.0024		7.49635	9.875	-2.28114	0.0839929	1.03146	11.2734	10.8513	11.6967	13.4701	13.1152	13.8267		10.0482	27.7952	28.9335
3.3	5.80199	0.00471291	0.000780312	-58.7398	6.86515	19.3071	8.20971	7.63273	1.32489	18.9692	35.2699	22.0423	-32.4805	4.00142	-17.4004		7.61168	10	-1.4657	0.0860653	1.0323	7.65446	7.23431	8.07591	10.0961	9.7493	10.4447		22.1385	60.0359	66.7813
3.35	5.86392	0.002531	0.000779959	-86.9984	3.83473	11.2259	0.936682	4.51572	-1.27261	9.48263	23.08	15.8254	-32.5026	3.99981	-17.4199		7.72701	10.1	-1.7045	0.0860653	1.03205	8.70438	8.28099	9.12908	11.0676	10.7159	11.4211		12.0371	33.0988	35.1595
3.4	5.92586	0.00446497	0.00079049	-61.1963	6.52079	18.3888	7.38323	7.27853	1.02972	17.8912	34.2103	21.5019	-31.8444	4.04768	-16.8412		7.84234	10.2	-1.4269	0.0860653	1.03234	7.48463	7.065	7.90556	9.93953	9.59354	10.2873		20.9906	56.9749	63.1879
3.45	5.98779	0.00259906	0.000782737	-85.7923	3.92925	11.478	1.16354	4.61295	-1.19159	9.77853	23.6002	16.0908	-32.3289	4.01244	-17.2672		7.95766	10.3	-1.2631	0.0860653	1.03251	6.77001	6.35257	7.18873	9.28256	8.93995	9.62695		12.3521	33.939	36.1458
3.5	6.03868	0.00478154	0.000797689	-58.0826	6.96047	19.5613	8.43847	7.73077	1.4066	19.2676	35.5534	22.1869	-31.3944	4.0804	-16.4457		8.07299	10.4	-1.9547	0.0860653	1.03179	9.81315	9.38633	10.2413	12.1002	11.7433	12.4589		22.4562	60.8832	67.776
3.55	6.08685	0.00340336	0.0007912	-73.5372	5.04634	14.4569	3.84454	5.76194	-0.234094	13.2755	28.8868	18.7869	-31.8	4.05091	-16.8022		8.18832	10.5	-2.0673	0.0860653	1.03168	10.3151	9.88671	10.7448	12.5698	12.2106	12.9308		16.0757	43.8687	47.8023
3.6	6.13502	0.00586502	0.000804105	-48.7989	8.4653	23.5741	12.0501	9.27859	2.69645	23.9783	39.5582	24.2293	-30.9934	4.10957	-16.0931		8.30365	10.6	-2.7945	0.0860653	1.03093	13.6015	13.1628	14.0415	15.676	15.3018	16.052		27.4723	74.2595	83.4785
3.65	6.18319	0.00508458	0.000806529	-55.2895	7.38137	20.6836	9.44861	8.16369	1.76736	20.5851	36.7583	22.8014	-30.8419	4.12059	-15.9599		8.41898	10.7	-3.9111	0.0860653	1.02977	18.8036	18.3485	19.2602	20.6925	20.2952	21.0916		23.8592	64.6245	72.1679
3.7	6.23136	0.00450028	0.000791555	-60.8382	6.56984	18.5196	7.50094	7.32897	1.07176	18.0447	34.3647	21.5807	-31.7778	4.05252	-16.7827		8.53431	10.8	-2.6497	0.0860653	1.03107	12.9408	12.5043	13.3788	15.0474	14.6762	15.4204		21.1541	57.4109	63.6997
3.75	6.27954	0.00446908	0.000786065	-61.1544	6.5265	18.404	7.39694	7.2844	1.03462	17.9091	34.2283	21.5111	-32.1209	4.02757	-17.0843		8.64964	10.9	-2.1153	0.0860653	1.03163	10.5296	10.1006	10.96	12.771	12.4108	13.133		21.0096	57.0257	63.2476
3.8	6.32771	0.00330878	0.00079554	-74.8183	4.91497	14.1066	3.52926	5.62682	-0.346694	12.8642	28.3341	18.5051	-31.5288	4.07063	-16.5638		8.76496	11	-2.1513	0.0860653	1.03159	10.6907	10.2612	11.1216	12.9222	12.5612	13.2849		15.6379	42.7009	46.4315
3.85	6.37588	0.00530111	0.000821826	-53.3939	7.68209	21.4856	10.1704	8.47301	2.02513	21.5266	37.576	23.2184	-29.8859	4.19012	-15.1194		8.88029	11.1429	-2.1209	0.0860653	1.03162	10.5547	10.1255	10.9851	12.7945	12.4341	13.1566		24.8616	67.2976	75.3059
3.9	6.42405	0.00477244	0.000823983	-58.1693	6.94783	19.5276	8.40813	7.71777	1.39576	19.228	35.5161	22.1678	-29.751	4.19992	-15.0009		8.99562	11.2857	-1.7907	0.0860653	1.03196	9.08537	8.6608	9.51125	11.4217	11.0682	11.777		22.4141	60.7709	67.644
3.95	6.47222	0.00314559	0.000806552	-77.1172	4.68832	13.5022	2.98531	5.3937	-0.54096	12.1548	27.3424	17.9993	-30.8405	4.12069	-15.9587		9.11095	11.4286	-4.3479	0.0860653	1.02932	20.892	20.4301	21.3553	22.7364	22.33	23.1445		14.8824	40.6863	44.0666
4	6.52039	0.00323278	0.000780169	-75.8745	4.80941	13.8251	3.27592	5.51825	-0.437171	12.5338	27.8785	18.2727	-32.4894	4.00077	-17.4083		9.22628	11.5714	-1.9629	0.0860653	1.03179	9.84964	9.42271	10.2779	12.1343	11.7773	12.4932		15.286	41.7627	45.3301
4.05	6.56857	0.00458835	0.000766321	-59.9573	6.69215	18.8457	7.7945	7.45478	1.17661	18.4276	34.7447	21.7745	-33.3549	3.93782	-18.1692		9.34161	11.7143	-2.0985	0.0860653	1.03164	10.4545	10.0257	10.8846	12.7005	12.3406	13.0622		21.5618	58.4981	64.9761
4.1	6.61674	0.00800733	0.000738948	-34.6465	11.4407	31.5086	19.1911	12.339	5.24682	33.2927	45.6631	27.3428	-35.0658	3.8134	-19.6732		9.45693	11.8571	-1.7929	0.0860653	1.03196	9.0951	8.67051	9.52102	11.4308	11.0772	11.7861		37.3904	100.708	114.527
4.15	6.66491	0.00342712	0.00072029	-73.2209	5.07933	14.5449	3.92374	5.79589	-0.205808	13.3788	29.0232	18.8565	-36.2319	3.72859	-20.6984		9.57226	12	-1.5379	0.0860653	1.03222	7.97105	7.54992	8.39347	10.3884	10.0401	10.7385		16.1857	44.162	48.1467
4.2	6.71308	0.00549568	0.000736999	-51.7554	7.95233	22.2062	10.8189	8.75097	2.25676	22.3725	38.2828	23.5789	-35.1876	3.80454	-19.7803		9.68759	12.2	-1.8915	0.0860653	1.03186	9.53223	9.10628	9.9595	11.838	11.4824	12.1954		25.7624	69.6998	78.1258
4.25	6.76125	0.00457989	0.00078345	-60.0412	6.6804	18.8144	7.7663	7.4427	1.16654	18.3908	34.7086	21.756	-32.2844	4.01568	-17.228		9.80292	12.4	-2.3017	0.0860653	1.03143	11.3659	10.9342	11.7989	13.5572	13.1931	13.923		21.5226	58.3937	64.8535
4.3	6.80942	0.00511552	0.000807263	-55.0137	7.42433	20.7982	9.55173	8.20788	1.80419	20.7196	36.8773	22.8621	-30.796	4.12392	-15.9196		9.91825	12.6	-2.1945	0.0860653	1.03155	10.8843	10.4542	11.3158	13.104	12.7422	13.4676		24.0024	65.0064	72.6162
4.35	6.85759	0.00582765	0.000808525	-49.0894	8.4134	23.4357	11.9255	9.22521	2.65196	23.8159	39.4328	24.1654	-30.7172	4.12966	-15.8503		10.0336	12.8	-1.8913	0.0860653	1.03186	9.53134	9.10539	9.95861	11.8372	11.4816	12.1945		27.2993	73.7981	82.9369
4.4	6.90577	0.00320205	0.000798136	-76.3086	4.76674	13.7113	3.17351	5.47436	-0.473748	12.4002	27.6912	18.1772	-31.3665	4.08243	-16.4211		10.1489	13	-1.8133	0.0860653	1.03194	9.18543	8.76055	9.61162	11.5148	11.1608	11.8706		15.1438	41.3834	44.8848
4.45	6.95394	0.00515745	0.00079276	-54.6427	7.48257	20.9535	9.69149	8.26778	1.8541	20.9019	37.0373	22.9437	-31.7025	4.058	-16.7165		10.2642	13.1429	-1.8531	0.0860653	1.0319	9.36182	8.9364	9.78857	11.6791	11.3243	12.0357		24.1965	65.524	73.2239
4.5	7.00237	0.00437643	0.000798385	-62.1068	6.39781	18.0608	7.08809	7.15204	0.924316	17.5062	33.8175	21.3016	-31.351	4.08357	-16.4074		10.3796	13.2857	-1.9691	0.0860653	1.03178	9.87724	9.45022	10.3056	12.1601	11.8029	12.5191		20.5807	55.8818	61.9047
4.55	7.05657	0.00494551	0.000805503	-56.55	7.18821	20.1686	8.98503	7.96501	1.6018	19.9805	36.2145	22.5241	-30.9061	4.11592	-16.0163		10.4949	13.4286	-2.0201	0.0860653	1.03173	10.1045	9.67674	10.5335	12.3726	12.0144	12.7326		23.2153	62.9075	70.1523
4.6	7.11076	0.00278264	0.00080085	-82.6901	4.18422	12.1579	1.77546	4.8752	-0.973052	10.5767	24.9384	16.7733	-31.1969	4.09477	-16.272		10.6102	13.5714	-2.1355	0.0860653	1.03161	10.62	10.1907	11.0507	12.8558	12.4951	13.2182		13.202	36.2054	38.8063
4.65	7.16495	0.00293506	0.000807374	-80.266	4.39592	12.7225	2.28354	5.09295	-0.791593	11.2394	25.9841	17.3065	-30.7891	4.12443	-15.9135		10.7255	13.7143	-2.2263	0.0860653	1.03151	11.027	10.5964	11.4589	13.2382	12.8757	13.6024		13.9077	38.0872	41.0154
4.7	7.21915	0.00343771	0.000822865	-73.0807	5.09404	14.5841	3.95903	5.81101	-0.193204	13.4248	29.0837	18.8873	-29.821	4.19484	-15.0624		10.8409	13.8571	-1.9009	0.0860653	1.03185	9.57398	9.1479	10.0014	11.8769	11.5211	12.2345		16.2348	44.2927	48.3001
4.75	7.27334	0.00468708	0.000823231	-58.9896	6.82928	19.2114	8.12361	7.59583	1.29415	18.8569	35.1622	21.9874	-29.7981	4.1965	-15.0423		10.9562	14	-1.7035	0.0860653	1.03205	8.69997	8.27659	9.12465	11.0635	10.7118	11.417		22.0189	59.7171	66.407
4.8	7.32753	0.00369529	0.000819244	-69.7965	5.45179	15.5381	4.81763	6.17899	0.113441	14.5447	30.5004	19.6099	-30.0473	4.17838	-15.2613		11.0715	14.125	-2.1461	0.0860653	1.0316	10.6674	10.238	11.0983	12.9003	12.5395	13.2629		17.4273	47.4727	52.0332
4.85	7.38172	0.00371431	0.000798411	-69.5631	5.47821	15.6086	4.88103	6.20616	0.136082	14.6274	30.6011	19.6612	-31.3493	4.08369	-16.406		11.1869	14.25	-1.7967	0.0860653	1.03196	9.11193	8.68727	9.53789	11.4464	11.0928	11.8018		17.5153	47.7075	52.3088
4.9	7.43592	0.0049928	0.000781487	-56.1175	7.25389	20.3437	9.14266	8.03257	1.65809	20.1861	36.4011	22.6192	-32.4071	4.00676	-17.3359		11.3022	14.375	-2.03056	0.118004	1.03172	10.1511	9.58129	10.7233	12.4163	11.9252	12.9107		23.4343	63.4913	70.8377
4.95	7.49011	0.00513891	0.000736172	-54.8064	7.45682	20.8848	9.62969	8.2413	1.83203	20.8213	36.9667	22.9077	-35.2392	3.80078	-19.8257		11.4175	14.5	-1.6966	0.118004	1.03206	8.66951	8.1058	9.23554	11.0353	10.5537	11.5202		24.1107	65.2952	72.9552
5	7.5443	0.00559191	0.000707528	-50.9664	8.08598	22.5626	11.1397	8.88844	2.37132	22.7909	38.6232	23.7525	-37.0295	3.67058	-21.3995		11.5328	14.625	-1.94369	0.118004	1.0318	9.76417	9.19596	10.3347	12.0545	11.5659	12.5464		26.2079	70.8877	79.5204
5.05	7.5985	0.00373471	0.000727063	-69.3142	5.50654	15.6841	4.94902	6.2353	0.160365	14.7161	30.7084	19.716	-35.8086	3.75938	-20.3262		11.6482	14.75	-2.30912	0.118004	1.03143	11.3993	10.8243	11.9767	13.5887	13.0897	14.0909		17.6098	47.9593	52.6044
5.1	7.65269	0.00430942	0.000757175	-62.808	6.30475	17.8127	6.86474	7.05632	0.844552	17.2149	33.515	21.1473	-33.9266	3.89625	-18.6717		11.7635	14.875	-2.12399	0.118004	1.03162	10.5685	9.99693	11.1424	12.8074	12.3137	13.3044		20.2705	55.0546	60.9337
5.15	7.70688	0.00123277	0.000774463	-119.696	2.03162	6.41765	-3.39078	2.66109	-2.81814	3.83811	8.97494	8.63187	-32.846	3.97483	-17.7218		11.8788	15	-2.27672	0.118004	1.03146	11.2535	10.6792	11.8303	13.4514	12.9534	13.9527		6.02669	17.0712	16.3444
5.2	7.76108	0.00554643	0.000760135	-51.3376	8.02282	22.3942	10.9881	8.82347	2.31718	22.5932	38.4631	23.6708	-33.7416	3.9097	-18.5091		11.9942	15.125	-2.70362	0.118004	1.03102	13.1865	12.6041	13.7714	15.2809	14.7708	15.7943		25.9974	70.3263	78.8613
5.25	7.81527	0.00403782	0.000759339	-65.7671	5.92753	16.8067	5.95939	6.66831	0.521212	16.034	32.2385	20.4963	-33.7913	3.90608	-18.5528		12.1095	15.25	-2.55687	0.118004	1.03117	12.519	11.9393	13.101	14.647	14.1411	15.1563		19.013	51.7015	56.9974
5.3	7.86946	0.00346826	0.000770846	-72.6785	5.13647	14.6973	4.06087	5.85466	-0.156831	13.5577	29.2572	18.9758	-33.0721	3.95839	-17.9205		12.2248	15.375	-2.26932	0.118004	1.03147	11.2203	10.646	11.7969	13.42	12.9223	13.9212		16.3762	44.6699	48.7429
5.35	7.92366	0.00363174	0.00079003	-70.5849	5.36353	15.3027	4.60581	6.0882	0.0377876	14.2684	30.1603	19.4364	-31.8731	4.04559	-16.8665		12.3401	15.5	-2.44592	0.118004	1.03129	12.0164	11.4388	12.5964	14.1713	13.6685	14.6774		17.1331	46.6882	51.1122
5.4	7.97785	0.00381992	0.00078745	-68.2887	5.62489	15.9997	5.23308	6.35703	0.261814	15.0866	31.1508	19.9416	-32.0344	4.03386	-17.0082		12.4555	15.625	-2.09052	0.118004	1.03165	10.4188	9.84788	10.9921	12.6671	12.1743	13.1631		18.0043	49.0114	53.8395
5.45	8.0233	0.00292146	0.000771151	-80.4772	4.37702	12.6721	2.23819	5.07351	-0.80779	11.1802	25.893	17.2601	-33.0531	3.95978	-17.9038		12.5708	15.75	-2.26629	0.118004	1.03147	11.2066	10.6325	11.7832	13.4072	12.9095	13.9083		13.8447	37.9192	40.8182
5.5	8.06272	0.00358712	0.000752911	-71.1469	5.30155	15.1375	4.45705	6.02445	-0.0153385	14.0744	29.9178	19.3127	-34.1931	3.87687	-18.906		12.6861	15.875	-1.52363	0.118004	1.03224	7.90843	7.34785	8.47131	10.3305	9.85385	10.8105		16.9265	46.1372	50.4654
5.55	8.10213	0.00086982	0.000737739	-135.548	1.52753	5.07341	-4.6006	2.1426	-3.25021	2.26009	2.1371	5.14457	-35.1413	3.8079	-19.7396		12.8015	16	-1.78223	0.118004	1.03197	9.04787	8.48261	9.61547	11.3868	10.9028	11.8742		4.34639	12.5904	11.0843
5.6	8.14154	0.00579587	0.000725831	-49.338	8.36926	23.318	11.8196	9.17981	2.61413	23.6777	39.3256	24.1107	-35.8856	3.75378	-20.3939		12.9168	16.1429	-1.98329	0.118004	1.03176	9.94043	9.37149	10.5117	12.2192	11.7295	12.7122		27.1522	73.4058	82.4763
5.65	8.18096	0.00419663	0.000715167	-64.0136	6.1481	17.3949	6.48877	6.89519	0.710276	16.7245	32.995	20.8821	-36.5521	3.7053	-20.9799		13.0321	16.2857	-1.69483	0.118004	1.03206	8.6617	8.09802	9.22769	11.028	10.5465	11.5129		19.7483	53.6621	59.299
5.7	8.22037	0.00505229	0.000720405	-55.579	7.33652	20.5641	9.34098	8.11756	1.72892	20.4448	36.6334	22.7377	-36.2247	3.72911	-20.692		13.1474	16.4286	-2.78696	0.118004	1.03093	13.567	12.983	14.1535	15.6432	15.1307	16.159		23.7097	64.2258	71.6999
5.75	8.25978	0.00674738	0.00074085	-42.4285	9.6908	26.8421	14.9913	10.5391	3.74688	27.8147	42.3062	25.6308	-34.9468	3.82205	-19.5687		13.2628	16.5714	-2.33374	0.118004	1.0314	11.5101	10.9347	12.088	13.6932	13.1936	14.1962		31.5573	85.1528	96.2663
5.8	8.29919	0.00331034	0.000754307	-74.7968	4.91714	14.1124	3.53448	5.62906	-0.34483	12.8711	28.3434	18.5098	-34.1058	3.88321	-18.8293		13.3781	16.7143	-2.29945	0.118004	1.03144	11.3557	10.7809	11.9329	13.5477	13.049	14.0496		15.6451	42.7203	46.4542
5.85	8.33861	0.005196	0.000766049	-54.3042	7.53611	21.0963	9.81999	8.32285	1.9	21.0696	37.1833	23.0182	-33.3719	3.93659	-18.1841		13.4934	16.8571	-1.93918	0.118004	1.03181	9.74411	9.17598	10.3146	12.0357	11.5473	12.5275		24.375	66	73.7826
5.9	8.37802	0.00362107	0.000774307	-70.7187	5.34871	15.2632	4.57023	6.07296	0.0250822	14.222	30.1026	19.407	-32.8558	3.97412	-17.7304		13.6088	17	-1.84803	0.118004	1.0319	9.33933	8.77286	9.90813	11.6581	11.1723	12.1474		17.0837	46.5564	50.9575
5.95	8.41743	0.00368284	0.000772689	-69.9499	5.4345	15.492	4.77613	6.1612	0.0986181	14.4906	30.4342	19.5761	-32.957	3.96677	-17.8193		13.7241	17.1429	-2.81776	0.118004	1.0309	13.7079	13.1233	14.295	15.7775	15.2641	16.2941		17.3696	47.319	51.8527
6	8.45685	0.00173622	0.000782276	-104.131	2.73086	8.28228	-1.71261	3.38031	-2.21879	6.02703	15.6896	12.0563	-32.3577	4.01035	-17.2925		13.8394	17.2857	-1.43368	0.118004	1.03233	7.5143	6.95534	8.07556	9.96687	9.49274	10.4443		8.35748	23.2866	23.6408
6.05	8.49626	0.00194447	0.00076906	-98.9815	3.02009	9.05358	-1.01845	3.67781	-1.97087	6.93246	17.9108	13.1891	-33.1837	3.95027	-18.0187		13.9547	17.4286	-2.32328	0.118004	1.03141	11.463	10.8878	12.0407	13.6488	13.1495	14.1514		9.3216	25.8576	26.6589
6.1	8.53567	0.00311032	0.000779597	-77.6298	4.63933	13.3716	2.86774	5.34332	-0.582951	12.0014	27.1213	17.8865	-32.5252	3.99817	-17.4398		14.1854	17.5714	-1.85006	0.118004	1.0319	9.34833	8.78183	9.91718	11.6665	11.1806	12.1558		14.7191	40.2509	43.5554
6.15	8.57509	0.00538784	0.000764927	-52.6562	7.80255	21.8068	10.4595	8.59691	2.12838	21.9036	37.8942	23.3807	-33.442	3.93149	-18.2458		14.3007	17.7143	-2.26837	0.118004	1.03147	11.216	10.6417	11.7926	13.416	12.9182	13.9171		25.2631	68.3684	76.5628
6.2	8.6145	0.00286266	0.000762448	-81.4014	4.29536	12.4543	2.04219	4.98951	-0.87779	10.9246	25.4943	17.0568	-33.597	3.92022	-18.382		14.4161	17.8571	-2.4168	0.118004	1.03132	11.8848	11.3078	12.4642	14.0469	13.5449	14.5522		13.5725	37.1933	39.966
6.25	8.65391	0.00476921	0.000769322	-58.2001	6.94334	19.5156	8.39735	7.71315	1.39191	19.2139	35.5028	22.1611	-33.1674	3.95146	-18.0043		14.5314	18	-1.72986	0.118004	1.03203	8.81634	8.25203	9.38298	11.1716	10.6891	11.6575		22.3991	60.7309	67.5972
6.3	8.69333	0.00493639	0.000772579	-56.634	7.17554	20.1348	8.95462	7.95198	1.59094	19.9408	36.1783	22.5056	-32.9638	3.96627	-17.8253		14.6467	18.1111	-2.64125	0.118004	1.03108	12.9024	12.3212	13.4861	15.0109	14.5026	15.5226		23.1731	62.7949	70.0201
6.35	8.73274	0.00488307	0.000783051	-57.1276	7.10148	19.9373	8.7769	7.87581	1.52746	19.709	35.9654	22.397	-32.3093	4.01387	-17.2499		14.762	18.2222	-2.26804	0.118004	1.03147	11.2145	10.6403	11.7911	13.4146	12.9169	13.9157		22.9262	62.1367	69.2474
6.4	8.77215	0.00187911	0.000786257	-100.536	2.92932	8.81153	-1.23629	3.58445	-2.04868	6.64832	17.2404	12.8473	-32.1089	4.02844	-17.0738		14.8774	18.3333	-1.84049	0.118004	1.03191	9.30592	8.7396	9.87459	11.627	11.1414	12.116		9.01904	25.0508	25.7118
6.45	8.81157	0.00285887	0.00079122	-81.4616	4.2901	12.4403	2.02957	4.9841	-0.882297	10.9081	25.4684	17.0435	-31.7988	4.051	-16.8011		14.9927	18.4444	-1.76971	0.118004	1.03198	8.99251	8.42748	9.55988	11.3353	10.8517	11.8223		13.555	37.1465	39.9112
6.5	8.85098		0.000778342										-32.6036	3.99247	-17.5087		15.108	18.5556	-1.84384	0.118004	1.03191	9.32075	8.75436	9.88948	11.6408	11.1551	12.1299
6.55	8.89039	0.00448835	0.000773547	-60.9589	6.55326	18.4754	7.46116	7.31193	1.05756	17.9928	34.3127	21.5541	-32.9033	3.97067	-17.7721		15.2234	18.6667	-1.47979	0.118004	1.03228	7.71617	7.15639	8.27826	10.153	9.67759	10.6318		21.0988	57.2636	63.5268
6.6	8.9298	0.00191765	0.000764675	-99.6127	2.98285	8.95426	-1.10783	3.6395	-2.0028	6.81587	17.6385	13.0503	-33.4578	3.93034	-18.2596		15.3387	18.7778	-1.64978	0.118004	1.03211	8.46307	7.90021	9.02824	10.8438	10.3635	11.3274		9.19746	25.5265	26.2703
6.65	8.96922	0.00472291	0.00075128	-58.6434	6.87905	19.3441	8.24304	7.64702	1.3368	19.0127	35.3115	22.0635	-34.295	3.86945	-18.9956		15.454	18.8889	-1.77887	0.118004	1.03198	9.03304	8.46784	9.60057	11.373	10.8891	11.8603		22.1848	60.1594	66.9263
6.7	9.01187	0.00160209	0.000739025	-107.785	2.54456	7.7855	-2.15972	3.18869	-2.37847	5.44385	14.1131	11.2523	-35.0609	3.81375	-19.6689		15.5693	19	-1.7001	0.118004	1.03206	8.68496	8.12119	9.25105	11.0496	10.5679	11.5346		7.73651	21.6307	21.6969
6.75	9.06606	0.00145656	0.000730408	-112.114	2.34245	7.24652	-2.6448	2.9808	-2.55171	4.81113	12.2459	10.3	-35.5995	3.77458	-20.1424		15.6847	19.1111	-2.06385	0.118004	1.03168	10.2997	9.72926	10.8725	12.5554	12.0634	13.0507		7.06278	19.8341	19.5878
6.8	9.12025	0.00364616	0.000707897	-70.4048	5.38356	15.3562	4.65388	6.10881	0.0549573	14.3311	30.238	19.476	-37.0064	3.67226	-21.3793		15.8	19.2222	-2.17081	0.118004	1.03157	10.7781	10.2057	11.3529	13.0042	12.5092	13.5026		17.1998	46.8662	51.3212
6.85	9.17445	0.00263019	0.000702424	-85.2511	3.97249	11.5933	1.26731	4.65742	-1.15453	9.91388	23.8337	16.2098	-37.3485	3.64738	-21.68														12.4963	34.3234	36.597
6.9	9.22864	0.00398029	0.000703536	-66.4194	5.84762	16.5937	5.76762	6.58612	0.452722	15.7839	31.9572	20.3528	-37.279	3.65244	-21.6189														18.7467	50.9912	56.1636
6.95	9.28283	0.00295121	0.000733681	-80.0167	4.41834	12.7822	2.33735	5.11601	-0.772374	11.3096	26.0917	17.3614	-35.3949	3.78946	-19.9626														13.9824	38.2865	41.2494
7	9.33703	0.00386863	0.000775373	-67.7127	5.69254	16.1801	5.39544	6.42662	0.3198	15.2984	31.3993	20.0683	-32.7892	3.97897	-17.6718														18.2298	49.6127	54.5454
7.05	9.39122	0.00317732	0.000810853	-76.6611	4.73239	13.6197	3.09106	5.43903	-0.503193	12.2927	27.5392	18.0996	-30.5717	4.14024	-15.7223														15.0292	41.078	44.5263
7.1	9.44541	0.00303937	0.000793865	-78.6787	4.54079	13.1088	2.63123	5.24196	-0.667416	11.6929	26.6689	17.6558	-31.6334	4.06302	-16.6558														14.3906	39.3749	42.5271
7.15	9.4996	0.00215769	0.00078571	-94.2519	3.31624	9.8433	-0.307698	3.98241	-1.71704	7.85952	19.951	14.2296	-32.1431	4.02595	-17.1039														10.3088	28.49	29.7491
7.2	9.5538	0.00377406	0.000763101	-68.8377	5.56119	15.8298	5.0802	6.29151	0.207213	14.8872	30.914	19.8208	-33.5562	3.92318	-18.3461														17.7919	48.4452	53.1748
7.25	9.60799	0.00487079	0.000779793	-57.242	7.08443	19.8918	8.73596	7.85827	1.51284	19.6556	35.916	22.3718	-32.5129	3.99906	-17.429														22.8694	61.9851	69.0694
7.3	9.66218	0.00508128	0.000787349	-55.319	7.37678	20.6714	9.43761	8.15897	1.76343	20.5708	36.7456	22.7949	-32.0407	4.03341	-17.0138														23.8439	64.5837	72.12
7.35	9.71638	0.00342566	0.000800795	-73.2403	5.07731	14.5395	3.91887	5.7938	-0.207546	13.3724	29.0148	18.8522	-31.2003	4.09452	-16.275														16.179	44.144	48.1255
7.4	9.77057	0.00230631	0.000797689	-91.2242	3.52265	10.3937	0.187692	4.19473	-1.54011	8.50569	21.257	14.8957	-31.3944	4.0804	-16.4457														10.9968	30.3248	31.903
7.45	9.82476	0.00641958	0.000774628	-44.6922	9.23553	25.6281	13.8986	10.0708	3.35665	26.3895	41.3297	25.1328	-32.8358	3.97558	-17.7128														30.0397	81.106	91.5157
7.5	9.87896	0.00563334	0.000764341	-50.6308	8.14353	22.7161	11.2778	8.94763	2.42064	22.971	38.7679	23.8263	-33.4787	3.92882	-18.278														26.3997	71.3993	80.1209
7.55	9.93315	0.0038977	0.000760296	-67.3724	5.73292	16.2878	5.49235	6.46815	0.354411	15.4248	31.5461	20.1431	-33.7315	3.91044	-18.5002														18.3644	49.9717	54.9667
7.6	9.98734	0.00405325	0.000760996	-65.5937	5.94896	16.8639	6.01084	6.69036	0.539587	16.1011	32.3134	20.5345	-33.6878	3.91362	-18.4618														19.0845	51.892	57.2211
7.65	10.0332	0.00557421	0.000763096	-51.1105	8.0614	22.4971	11.0807	8.86316	2.35025	22.714	38.561	23.7208	-33.5565	3.92316	-18.3464														26.126	70.6693	79.2639
7.7	10.0766	0.00382098	0.000754236	-68.2761	5.62636	16.0036	5.2366	6.35854	0.263073	15.0912	31.1562	19.9443	-34.1102	3.88289	-18.8332														18.0092	49.0245	53.8548
7.75	10.1199	0.00492571	0.000734533	-56.7324	7.16071	20.0952	8.91904	7.93673	1.57823	19.8944	36.1359	22.484	-35.3417	3.79333	-19.9158														23.1237	62.6631	69.8654
7.8	10.1633	0.00409399	0.000714482	-65.1392	6.00554	17.0148	6.14662	6.74855	0.588079	16.2782	32.5094	20.6345	-36.5948	3.70219	-21.0174														19.2731	52.3949	57.8114
7.85	10.2066	0.00285724	0.000716033	-81.4874	4.28784	12.4342	2.02414	4.98178	-0.884234	10.9011	25.4572	17.0378	-36.4979	3.70924	-20.9322														13.5474	37.1265	39.8876
7.9	10.25	0.00419449	0.000745252	-64.0368	6.14513	17.387	6.48164	6.89213	0.707728	16.7152	32.985	20.877	-34.6718	3.84205	-19.3268														19.7384	53.6357	59.268
7.95	10.2934	0.00486784	0.000768105	-57.2696	7.08033	19.8809	8.72613	7.85406	1.50933	19.6428	35.9042	22.3658	-33.2434	3.94593	-18.0712														22.8557	61.9486	69.0267
8	10.3367	0.00286955	0.000772185	-81.2922	4.30492	12.4798	2.06515	4.99935	-0.869589	10.9545	25.5415	17.0808	-32.9884	3.96448	-17.847														13.6044	37.2783	40.0659
8.05	10.3801	0.00259971	0.000784828	-85.7809	3.93016	11.4804	1.16571	4.61387	-1.19082	9.78136	23.6051	16.0933	-32.1983	4.02194	-17.1523														12.3551	33.9471	36.1552
8.1	10.4234	0.00213371	0.000777443	-94.7599	3.28293	9.75448	-0.387631	3.94816	-1.74558	7.75526	19.7318	14.1179	-32.6598	3.98838	-17.5581														10.1977	28.194	29.4016
8.15	10.4668	0.00629414	0.000762737	-45.5892	9.0613	25.1635	13.4805	9.89163	3.20731	25.8441	40.9428	24.9355	-33.5789	3.92153	-18.3661														29.459	79.5573	89.6977
8.2	10.5101	0.00329012	0.000752256	-75.0753	4.88906	14.0375	3.46708	5.60018	-0.368901	12.7831	28.2233	18.4485	-34.234	3.87389	-18.942														15.5515	42.4707	46.1612
8.25	10.5535	0.00326948	0.000745257	-75.3613	4.86039	13.961	3.39828	5.57069	-0.393473	12.6934	28.0999	18.3856	-34.6715	3.84208	-19.3266														15.4559	42.2158	45.8621
8.3	10.5968	0.00550334	0.00076394	-51.6921	7.96297	22.2346	10.8445	8.76191	2.26588	22.4058	38.3101	23.5928	-33.5038	3.927	-18.3														25.7979	69.7943	78.2368
8.35	10.6402	0.00584672	0.000791697	-48.941	8.43988	23.5064	11.9891	9.25245	2.67466	23.8988	39.4969	24.1981	-31.7689	4.05317	-16.7749														27.3876	74.0335	83.2133
8.4	10.6835	0.00408762	0.000804796	-65.21	5.99669	16.9912	6.12539	6.73945	0.580496	16.2505	32.4789	20.6189	-30.9503	4.11271	-16.0552														19.2436	52.3163	57.7191
8.45	10.7269	0.00326121	0.000799948	-75.4765	4.84891	13.9304	3.37071	5.55888	-0.403318	12.6574	28.0502	18.3603	-31.2532	4.09067	-16.3215														15.4177	42.1137	45.7422
8.5	10.7703	0.00393864	0.000801027	-66.8976	5.78977	16.4394	5.62879	6.52663	0.40314	15.6028	31.7509	20.2476	-31.1858	4.09558	-16.2623														18.5539	50.477	55.56
8.55	10.8136	0.00474105	0.000800451	-58.4692	6.90424	19.4113	8.30351	7.67293	1.3584	19.0915	35.3867	22.1019	-31.2218	4.09296	-16.2939														22.2688	60.3834	67.1892
8.6	10.857	0.00128466	0.000812404	-117.822	2.10369	6.60984	-3.21781	2.73523	-2.75636	4.06373	9.78341	9.04419	-30.4748	4.14729	-15.6372														6.26694	17.7118	17.0965
8.65	10.9003	0.002846	0.000804551	-81.6666	4.27222	12.3926	1.98667	4.96572	-0.897618	10.8522	25.3799	16.9984	-30.9656	4.11159	-16.0686														13.4954	36.9877	39.7247
8.7	10.9437	0.00470788	0.000817594	-58.7884	6.85816	19.2884	8.19292	7.62554	1.3189	18.9473	35.249	22.0316	-30.1504	4.17088	-15.352														22.1152	59.9738	66.7084
8.75	10.987	0.00499613	0.000802724	-56.0871	7.25852	20.3561	9.15378	8.03733	1.66206	20.2006	36.4142	22.6259	-31.0797	4.10329	-16.169														23.4497	63.5325	70.886
8.8	11.0434	0.00487991	0.000802909	-57.157	7.0971	19.9256	8.76636	7.8713	1.5237	19.6953	35.9527	22.3905	-31.0682	4.10413	-16.1588														22.9116	62.0976	69.2016
8.85	11.1053	0.0057082	0.000792761	-50.0308	8.24749	22.9933	11.5273	9.05457	2.50976	23.2965	39.0268	23.9583	-31.7024	4.05801	-16.7164														26.7463	72.3234	81.2057
8.9	11.1673	0.00767531	0.000777791	-36.5714	10.9796	30.2789	18.0844	11.8647	4.85156	31.8492	44.8328	26.9194	-32.6381	3.98996	-17.539														35.8533	96.6088	109.715
8.95	11.2292	0.00604653	0.000759117	-47.4135	8.7174	24.2464	12.6551	9.5379	2.91253	24.7675	40.1558	24.5341	-33.8052	3.90508	-18.565														28.3126	76.5004	86.1091
9	11.2911	0.00570809	0.000733723	-50.0317	8.24734	22.9929	11.527	9.05441	2.50963	23.296	39.0264	23.9581	-35.3923	3.78965	-19.9603														26.7458	72.3221	81.2042
9.05	11.3531	0.00413408	0.000739052	-64.6962	6.06122	17.1633	6.28027	6.80583	0.635809	16.4525	32.7005	20.7319	-35.0593	3.81387	-19.6675														19.4587	52.8899	58.3925
9.1	11.415	0.00335093	0.000740107	-74.2429	4.97352	14.2627	3.66977	5.68704	-0.29651	13.0475	28.5823	18.6316	-34.9933	3.81867	-19.6095														15.833	43.2214	47.0425
9.15	11.4769	0.00275449	0.000747415	-83.1522	4.14513	12.0537	1.68165	4.83499	-1.00655	10.4543	24.7391	16.6716	-34.5365	3.85189	-19.208														13.0717	35.858	38.3985
9.2	11.5389	0.00462251	0.000740502	-59.6202	6.73959	18.9722	7.90836	7.50358	1.21727	18.5761	34.8902	21.8486	-34.9686	3.82046	-19.5878														21.7199	58.9198	65.4711
9.25	11.6008	0.00270645	0.000735416	-83.9519	4.07841	11.8758	1.52151	4.76636	-1.06375	10.2454	24.3941	16.4957	-35.2865	3.79735	-19.8673														12.8493	35.2649	37.7022
9.3	11.6627	0.00344506	0.000748155	-72.9836	5.10425	14.6113	3.98353	5.82151	-0.184454	13.4568	29.1255	18.9087	-34.4903	3.85525	-19.1673														16.2688	44.3834	48.4066
9.35	11.7247	0.0051807	0.000758121	-54.4382	7.51487	21.0396	9.76902	8.30101	1.88179	21.0031	37.1255	22.9887	-33.8675	3.90055	-18.6197														24.3042	65.8112	73.5609
9.4	11.7866	0.00330596	0.000770937	-74.857	4.91106	14.0962	3.51987	5.6228	-0.350045	12.852	28.3174	18.4965	-33.0664	3.9588	-17.9156														15.6248	42.6662	46.3908
9.45	11.8486	0.00350032	0.000781332	-72.2603	5.181	14.816	4.16774	5.90046	-0.118665	13.6971	29.4376	19.0678	-32.4168	4.00605	-17.3444														16.5246	45.0657	49.2076
9.5	11.9105	0.00444569	0.000792166	-61.393	6.49402	18.3174	7.31898	7.25099	1.00678	17.8074	34.1254	21.4586	-31.7396	4.0553	-16.7491														20.9014	56.737	62.9086
9.55	11.9724	0.00365895	0.000794258	-70.2457	5.40131	15.4035	4.69649	6.12707	0.0701733	14.3867	30.3066	19.511	-31.6089	4.06481	-16.6342														17.259	47.024	51.5065
9.6	12.0481	0.0046784	0.000779704	-59.0739	6.81722	19.1793	8.09466	7.58343	1.28381	18.8191	35.1258	21.9688	-32.5185	3.99866	-17.4338														21.9787	59.6099	66.2811
9.65	12.1348	0.0027166	0.000734084	-83.7818	4.09251	11.9133	1.55535	4.78086	-1.05166	10.2896	24.4675	16.5331	-35.3697	3.79129	-19.9404														12.8963	35.3902	37.8493
9.7	12.2215	0.00296211	0.000692492	-79.849	4.43349	12.8226	2.3737	5.13159	-0.759391	11.357	26.164	17.3983	-37.9692	3.60224	-22.2257														14.0329	38.4211	41.4074
9.75	12.3082	0.00575067	0.000688913	-49.6938	8.30649	23.1506	11.6689	9.11525	2.56032	23.4812	39.1721	24.0324	-38.1929	3.58597	-22.4223														26.9429	72.8478	81.8213
9.8	12.3949	0.0047732	0.000675632	-58.1621	6.94888	19.5304	8.41065	7.71885	1.39666	19.2313	35.5192	22.1694	-39.023	3.5256	-23.1521														22.4176	60.7802	67.655
9.85	12.4816	0.00292737	0.000694428	-80.3854	4.38523	12.6939	2.25789	5.08195	-0.800755	11.2059	25.9326	17.2803	-37.8482	3.61104	-22.1193														13.8721	37.9922	40.9039
9.9	12.5684	0.00485393	0.000724072	-57.3996	7.06102	19.8294	8.67977	7.83419	1.49277	19.5823	35.848	22.3372	-35.9955	3.74578	-20.4906														22.7913	61.7769	68.8251
9.95	12.6551	0.00263297	0.000740438	-85.2031	3.97635	11.6036	1.27657	4.66139	-1.15123	9.92596	23.8544	16.2204	-34.9726	3.82017	-19.5913														12.5091	34.3577	36.6372
10	12.7418	0.00285416	0.000748712	-81.5365	4.28356	12.4228	2.01387	4.97737	-0.887903	10.8877	25.4361	17.027	-34.4555	3.85778	-19.1367														13.5332	37.0884	39.8429
10.05	12.8285	0.00528309	0.000751033	-53.5486	7.65707	21.4189	10.1103	8.44727	2.00368	21.4482	37.5093	23.1844	-34.3105	3.86833	-19.0092														24.7782	67.0752	75.0448
10.1	12.9152	0.00599353	0.000754089	-47.8137	8.64379	24.0501	12.4784	9.46219	2.84944	24.5371	39.9832	24.4461	-34.1194	3.88222	-18.8412														28.0673	75.8461	85.341
10.15	13.0014	0.00674755	0.000752679	-42.4273	9.69105	26.8428	14.9918	10.5394	3.74709	27.8154	42.3067	25.6311	-34.2076	3.87581	-18.9187														31.5581	85.155	96.2689
10.2	13.0633	0.00392585	0.000765881	-67.0453	5.77202	16.3921	5.58618	6.50836	0.387922	15.5472	31.6872	20.2151	-33.3824	3.93582	-18.1933														18.4947	50.3192	55.3747
10.25	13.1252	0.0051	0.000762994	-55.1518	7.40278	20.7408	9.50001	8.18572	1.78572	20.6522	36.8177	22.8317	-33.5629	3.9227	-18.352														23.9306	64.8149	72.3913
10.3	13.1872	0.00347302	0.000753255	-72.6161	5.14309	14.7149	4.07675	5.86146	-0.151161	13.5784	29.2841	18.9895	-34.1716	3.87843	-18.8871														16.3983	44.7287	48.812
10.35	13.2491	0.0045697	0.00070205	-60.1425	6.66625	18.7767	7.73233	7.42814	1.1544	18.3465	34.6649	21.7337	-37.3719	3.64568	-21.7006														21.4755	58.2679	64.7058
10.4	13.311	0.00558868	0.000665732	-50.9927	8.0815	22.5507	11.1289	8.88382	2.36747	22.7769	38.6118	23.7467	-39.6417	3.4806	-23.696														26.1929	70.8479	79.4736
10.45	13.373	0.00444405	0.000648355	-61.4098	6.49173	18.3113	7.31349	7.24864	1.00482	17.8002	34.1182	21.4549	-40.7278	3.40161	-24.6508														20.8937	56.7166	62.8847
10.5	13.4349	0.00540271	0.000665758	-52.5309	7.82321	21.8619	10.509	8.61816	2.14608	21.9683	37.9483	23.4083	-39.6402	3.48072	-23.6946														25.332	68.552	76.7784
10.55	13.4968	0.00316301	0.000685842	-76.8663	4.71251	13.5667	3.04336	5.41858	-0.520229	12.2305	27.4507	18.0545	-38.3849	3.57201	-22.5911														14.963	40.9013	44.319
10.6	13.5588	0.00393668	0.00070136	-66.9202	5.78706	16.4321	5.62227	6.52383	0.40081	15.5943	31.7412	20.2426	-37.415	3.64254	-21.7385														18.5448	50.4528	55.5316
10.65	13.6207	0.0016768	0.000727868	-105.713	2.64833	8.0622	-1.91068	3.29542	-2.28953	5.76867	15.0068	11.7081	-35.7582	3.76304	-20.282														8.08238	22.553	22.7796
10.7	13.6826	0.00488856	0.000762031	-57.0765	7.10912	19.9576	8.79522	7.88366	1.53401	19.7329	35.9875	22.4083	-33.623	3.91832	-18.4049														22.9517	62.2045	69.327
10.75	13.7446	0.00494068	0.000773283	-56.5944	7.1815	20.1507	8.96894	7.95812	1.59605	19.9595	36.1954	22.5143	-32.9198	3.96947	-17.7867														23.193	62.8479	70.0824
10.8	13.8065	0.00244982	0.000768794	-88.4803	3.72197	10.9253	0.666063	4.39974	-1.36926	9.12965	22.4407	15.4994	-33.2004	3.94906	-18.0333														11.6612	32.0965	33.9829
10.85	13.8684	0.00352565	0.000776444	-71.9326	5.21618	14.9098	4.25217	5.93664	-0.0885119	13.8072	29.5789	19.1399	-32.7222	3.98384	-17.613														16.6419	45.3784	49.5746
10.9	13.9304	0.00462004	0.000785659	-59.6445	6.73616	18.9631	7.90013	7.50005	1.21433	18.5654	34.8797	21.8433	-32.1463	4.02572	-17.1066														21.7085	58.8894	65.4353
10.95	13.9923	0.00283945	0.000770277	-81.7715	4.26312	12.3683	1.96482	4.95635	-0.905422	10.8237	25.3347	16.9754	-33.1077	3.9558	-17.9518														13.465	36.9067	39.6296
11	14.0475	0.00595624	0.000746293	-48.0974	8.59199	23.912	12.3541	9.40891	2.80504	24.3749	39.8608	24.3837	-34.6067	3.84679	-19.2696														27.8946	75.3856	84.8005
11.05	14.1017	0.00467734	0.000721191	-59.0841	6.81575	19.1753	8.09114	7.58192	1.28255	18.8145	35.1214	21.9666	-36.1756	3.73268	-20.6489														21.9738	59.5968	66.2658
11.1	14.1559	0.00434646	0.000708605	-62.419	6.3562	17.9499	6.98821	7.10923	0.888648	17.3759	33.6828	21.2329	-36.9622	3.67548	-21.3404														20.442	55.5119	61.4705
11.15	14.21	0.00312953	0.000715214	-77.3499	4.66602	13.4427	2.93177	5.37076	-0.560082	12.0849	27.2421	17.9481	-36.5491	3.70552	-20.9772														14.808	40.488	43.8338
11.2	14.2642	0.00632887	0.000735016	-45.3391	9.10954	25.2921	13.5962	9.94124	3.24865	25.9951	41.0506	24.9905	-35.3115	3.79553	-19.8892														29.6198	79.986	90.201
11.25	14.3184	0.00352999	0.000740944	-71.8766	5.22221	14.9259	4.26663	5.94284	-0.0833455	13.826	29.6031	19.1522	-34.941	3.82247	-19.5635														16.662	45.432	49.6375
11.3	14.3726	0.00391563	0.000750158	-67.1638	5.75782	16.3542	5.55211	6.49376	0.375753	15.5027	31.636	20.189	-34.3651	3.86435	-19.0573														18.4474	50.193	55.2266
11.35	14.4268	0.00468377	0.000726928	-59.0217	6.82469	19.1992	8.11258	7.59111	1.29021	18.8425	35.1483	21.9803	-35.817	3.75877	-20.3336														22.0036	59.6762	66.359
11.4	14.481	0.00165404	0.000727777	-106.335	2.61672	7.97791	-1.98654	3.26291	-2.31662	5.66973	14.7388	11.5715	-35.764	3.76262	-20.287														7.97702	22.2721	22.4498
11.45	14.5352	0.00532092	0.000721473	-53.2243	7.70961	21.559	10.2364	8.50132	2.04872	21.6127	37.6492	23.2557	-36.1579	3.73397	-20.6334														24.9533	67.5422	75.5931
11.5	14.5894	0.00253646	0.000736603	-86.9005	3.84231	11.2462	0.954882	4.52352	-1.26611	9.50637	23.1222	15.847	-35.2123	3.80274	-19.8021														12.0623	33.1662	35.2386
11.55	14.6436	0.00543306	0.000748522	-52.2763	7.86535	21.9743	10.6102	8.66151	2.18221	22.1002	38.0581	23.4643	-34.4674	3.85692	-19.1472														25.4725	68.9266	77.2182
11.6	14.6978	0.00398332	0.000755637	-66.3847	5.85184	16.6049	5.77775	6.59046	0.456338	15.7971	31.9721	20.3604	-34.0227	3.88926	-18.7562														18.7608	51.0287	56.2076
11.65	14.752	0.00266142	0.000754978	-84.7146	4.01586	11.709	1.3714	4.70203	-1.11736	10.0497	24.0651	16.3279	-34.0639	3.88626	-18.7924														12.6408	34.7089	37.0496
11.7	14.8062	0.00336308	0.00077435	-74.0784	4.99039	14.3077	3.71027	5.7044	-0.282047	13.1003	28.6533	18.6678	-32.8531	3.97432	-17.728														15.8893	43.3714	47.2186
11.75	14.8604	0.00331311	0.000785978	-74.7587	4.92099	14.1226	3.54372	5.63302	-0.34153	12.8831	28.3598	18.5182	-32.1264	4.02717	-17.0891														15.6579	42.7545	46.4944
11.8	14.9146	0.00455739	0.000805035	-60.2651	6.64915	18.7311	7.6913	7.41056	1.13975	18.293	34.612	21.7068	-30.9353	4.11379	-16.042														21.4185	58.1159	64.5274
11.85	14.9687	0.00395892	0.000814081	-66.6641	5.81794	16.5145	5.6964	6.5556	0.427284	15.691	31.8516	20.299	-30.3699	4.15491	-15.545														18.6478	50.7274	55.8539
11.9	15.0229	0.00343911	0.000776563	-73.0622	5.09598	14.5893	3.96369	5.81301	-0.191539	13.4309	29.0916	18.8914	-32.7148	3.98438	-17.6064														16.2412	44.31	48.3204
11.95	15.0771	0.00470682	0.000729865	-58.7986	6.8567	19.2845	8.1894	7.62403	1.31764	18.9427	35.2446	22.0294	-35.6335	3.77211	-20.1723														22.1103	59.9607	66.6931
12	15.1313	0.00473773	0.000705062	-58.501	6.89963	19.399	8.29244	7.66819	1.35444	19.0771	35.3729	22.0948	-37.1836	3.65937	-21.535														22.2534	60.3424	67.141
12.05	15.1855	0.000842032	0.000695945	-137.024	1.48893	4.97049	-4.69323	2.1029	-3.2833	2.13927	1.50047	4.81989	-37.7535	3.61793	-22.036														4.21774	12.2473	10.6816
12.1	15.2397	0.00303046	0.000699129	-78.8121	4.52842	13.0758	2.60154	5.22923	-0.678022	11.6542	26.6113	17.6264	-37.5544	3.63241	-21.861														14.3494	39.265	42.398
12.15	15.2939	0.00633183	0.000696288	-45.3178	9.11365	25.3031	13.6061	9.94547	3.25218	26.0079	41.0598	24.9952	-37.732	3.61949	-22.0171														29.6335	80.0226	90.2439
12.2	15.3481	0.00280314	0.000710144	-82.3563	4.2127	12.2339	1.84382	4.90449	-0.948637	10.6658	25.0824	16.8467	-36.866	3.68247	-21.2558														13.297	36.4586	39.1035
12.25	15.4023	0.00385451	0.000719848	-67.879	5.67293	16.1278	5.34836	6.40644	0.302987	15.237	31.3275	20.0317	-36.2595	3.72658	-20.7227														18.1644	49.4384	54.3407
12.3	15.4565	0.00365325	0.000735348	-70.3166	5.3934	15.3824	4.6775	6.11893	0.0633917	14.362	30.276	19.4954	-35.2908	3.79704	-19.871														17.2326	46.9537	51.4239
12.35	15.5107	0.00337516	0.000741136	-73.9154	5.00716	14.3524	3.75053	5.72165	-0.267669	13.1529	28.7236	18.7037	-34.929	3.82335	-19.5529														15.9452	43.5205	47.3936
12.4	15.5649	0.00254026	0.000743344	-86.8325	3.84758	11.2602	0.967529	4.52894	-1.2616	9.52286	23.1515	15.8619	-34.791	3.83338	-19.4317														12.0799	33.2131	35.2936
12.45	15.6191	0.000638152	0.000753029	-149.625	1.20577	4.21538	-5.37283	1.81165	-3.52601	1.25284	-3.93563	2.04748	-34.1857	3.8774	-18.8995														3.27385	9.73027	7.72684
12.5	15.6733	0.00416562	0.000752627	-64.3508	6.10502	17.2801	6.38539	6.85088	0.673353	16.5896	32.8495	20.8079	-34.2108	3.87558	-18.9216														19.6047	53.2792	58.8495
12.55	15.7275	0.00395658	0.000759705	-66.6909	5.8147	16.5059	5.68861	6.55226	0.424502	15.6808	31.84	20.2931	-33.7684	3.90775	-18.5327														18.637	50.6985	55.82
12.6	15.7816	0.00525604	0.000776562	-53.7819	7.61951	21.3187	10.0201	8.40864	1.97148	21.3306	37.4086	23.1331	-32.7149	3.98437	-17.6065														24.653	66.7413	74.6528
12.65	15.8358	0.00378079	0.000791294	-68.7567	5.57054	15.8548	5.10263	6.30113	0.215225	14.9165	30.9489	19.8386	-31.7941	4.05134	-16.797														17.8231	48.5283	53.2723
12.7	15.89	0.00443351	0.00079833	-61.5177	6.4771	18.2723	7.27837	7.23359	0.992273	17.7544	34.0716	21.4312	-31.3544	4.08332	-16.4104														20.845	56.5865	62.732
12.75	15.9442	0.00375365	0.000802506	-69.0842	5.53285	15.7543	5.01216	6.26236	0.182916	14.7985	30.8076	19.7665	-31.0934	4.1023	-16.181														17.6974	48.1932	52.879
12.8	15.9984	0.00343219	0.000814519	-73.1537	5.08638	14.5637	3.94064	5.80313	-0.199773	13.4008	29.0522	18.8713	-30.3426	4.1569	-15.5209														16.2092	44.2246	48.2202
12.85	16.0601	0.0038928	0.00080941	-67.4296	5.72611	16.2696	5.47601	6.46115	0.348575	15.4035	31.5214	20.1306	-30.6619	4.13368	-15.8016														18.3417	49.9111	54.8957
12.9	16.1221	0.00269124	0.000807677	-84.2081	4.05728	11.8194	1.47081	4.74463	-1.08185	10.1793	24.2836	16.4393	-30.7702	4.1258	-15.8969														12.7789	35.0771	37.4818
12.95	16.184	0.00262348	0.000807419	-85.3672	3.96317	11.5685	1.24494	4.64783	-1.16252	9.8847	23.7836	16.1843	-30.7863	4.12463	-15.911														12.4652	34.2405	36.4997
13	16.2459	0.00598795	0.000772375	-47.856	8.63604	24.0294	12.4598	9.45421	2.8428	24.5128	39.9649	24.4368	-32.9766	3.96534	-17.8365														28.0414	75.7772	85.2601
13.05	16.3079	0.00403546	0.000738429	-65.7937	5.92425	16.798	5.95152	6.66494	0.518402	16.0237	32.2271	20.4905	-35.0982	3.81104	-19.7017														19.0021	51.6723	56.9631
13.1	16.3698	0.00355062	0.000719896	-71.6118	5.25085	15.0023	4.33539	5.97231	-0.058791	13.9157	29.7173	19.2105	-36.2565	3.7268	-20.72														16.7575	45.6866	49.9365
13.15	16.4317	0.00530909	0.000712644	-53.3255	7.69318	21.5151	10.197	8.48441	2.03463	21.5613	37.6055	23.2335	-36.7097	3.69384	-21.1184														24.8986	67.3962	75.4216
13.2	16.4937	0.00337162	0.000717827	-73.963	5.00226	14.3394	3.73875	5.71661	-0.271875	13.1375	28.7031	18.6932	-36.3858	3.71739	-20.8337														15.9288	43.4768	47.3424
13.25	16.5556	0.00477775	0.000729284	-58.1187	6.95521	19.5472	8.42585	7.72536	1.40209	19.2511	35.5379	22.179	-35.6697	3.76947	-20.2042														22.4387	60.8365	67.7211
13.3	16.6175	0.00273743	0.000734071	-83.4346	4.12143	11.9905	1.62477	4.81062	-1.02687	10.3801	24.6173	16.6095	-35.3705	3.79123	-19.9411														12.9927	35.6473	38.1512
13.35	16.6795	0.00606786	0.000735912	-47.2534	8.74703	24.3254	12.7262	9.56837	2.93793	24.8603	40.2249	24.5693	-35.2555	3.7996	-19.84														28.4114	76.7637	86.4183
13.4	16.7414	0.00396516	0.000727759	-66.5925	5.82661	16.5376	5.71721	6.56452	0.434718	15.7181	31.8825	20.3147	-35.7651	3.76254	-20.288														18.6767	50.8045	55.9444
13.45	16.8033	0.00475207	0.000722199	-58.3637	6.91954	19.4521	8.34022	7.68867	1.37151	19.1394	35.4322	22.1251	-36.1125	3.73727	-20.5934														22.3197	60.5193	67.3488
13.5	16.8653	0.00434093	0.000728282	-62.4769	6.34852	17.9294	6.96977	7.10133	0.882061	17.3519	33.6578	21.2202	-35.7324	3.76492	-20.2592														20.4163	55.4436	61.3903
13.55	16.9272	0.00243409	0.000723813	-88.7731	3.70012	10.867	0.613628	4.37727	-1.38799	9.06125	22.3144	15.435	-36.0117	3.74461	-20.5048														11.5884	31.9023	33.7549
13.6	16.9892	0.00252878	0.000723477	-87.0384	3.83163	11.2177	0.929253	4.51254	-1.27527	9.47294	23.0627	15.8166	-36.0327	3.74308	-20.5232														12.0267	33.0713	35.1272
13.65	17.0511	0.00372784	0.000736218	-69.3978	5.497	15.6587	4.92614	6.22549	0.152195	14.6863	30.6724	19.6976	-35.2364	3.80099	-19.8232														17.578	47.8746	52.505
13.7	17.113	0.00367881	0.000736871	-69.9997	5.4289	15.4771	4.76269	6.15544	0.0938168	14.4731	30.4127	19.5651	-35.1956	3.80396	-19.7873														17.351	47.2692	51.7943
13.75	17.175	0.00312629	0.000740225	-77.3971	4.66151	13.4307	2.92095	5.36612	-0.563945	12.0708	27.2217	17.9377	-34.9859	3.81921	-19.603														14.793	40.448	43.7868
13.8	17.2369	0.00329111	0.000723	-75.0616	4.89043	14.0411	3.47037	5.60159	-0.367727	12.7874	28.2291	18.4515	-36.0625	3.74091	-20.5494														15.5561	42.4828	46.1755
13.85	17.2988	0.00328301	0.000725365	-75.1737	4.87918	14.0111	3.44336	5.59001	-0.377372	12.7522	28.1808	18.4269	-35.9147	3.75166	-20.4195														15.5186	42.3828	46.0581
13.9	17.3608	0.00412098	0.000721262	-64.8404	6.04303	17.1148	6.23661	6.78712	0.620219	16.3956	32.6383	20.7002	-36.1711	3.73301	-20.6449														19.3981	52.7282	58.2027
13.95	17.4227	0.00410657	0.000706738	-64.9997	6.02301	17.0614	6.18856	6.76653	0.603059	16.3329	32.5696	20.6651	-37.0789	3.66699	-21.443														19.3313	52.5502	57.9938
14	17.4566	0.00539007	0.000676634	-52.6374	7.80566	21.8151	10.4669	8.60011	2.13104	21.9134	37.9024	23.3849	-38.9604	3.53016	-23.097														25.2735	68.396	76.5953
14.05	17.4876	0.00477795	0.000665242	-58.1168	6.95549	19.548	8.42651	7.72565	1.40232	19.252	35.5387	22.1794	-39.6724	3.47837	-23.7229														22.4396	60.8389	67.724
14.1	17.5185	0.00317656	0.000661904	-76.6719	4.73134	13.6169	3.08855	5.43795	-0.504091	12.2894	27.5345	18.0973	-39.881	3.4632	-23.9064														15.0258	41.0687	44.5154
14.15	17.5495	0.00486755	0.000656752	-57.2723	7.07993	19.8798	8.72516	7.85364	1.50898	19.6415	35.903	22.3652	-40.203	3.43978	-24.1894														22.8544	61.945	69.0224
14.2	17.5895	0.00781939	0.000683643	-35.7261	11.1797	30.8126	18.5646	12.0706	5.02308	32.4756	45.1974	27.1053	-38.5223	3.56202	-22.7119														36.5203	98.3875	111.803
14.25	17.6514	0.00481272	0.000712137	-57.7872	7.00378	19.6767	8.54239	7.77531	1.44371	19.4031	35.6809	22.2519	-36.7414	3.69153	-21.1463														22.6005	61.2681	68.2278
14.3	17.7134	0.00632727	0.000701366	-45.3505	9.10732	25.2862	13.5909	9.93896	3.24675	25.9881	41.0457	24.988	-37.4146	3.64257	-21.7381														29.6124	79.9663	90.1779
14.35	17.7753	0.00581712	0.000691949	-49.1716	8.39878	23.3967	11.8904	9.21017	2.63943	23.7701	39.3974	24.1473	-38.0032	3.59977	-22.2556														27.2506	73.6682	82.7844
14.4	17.8373	0.0071683	0.00067146	-39.6778	10.2754	28.4011	16.3943	11.1404	4.24798	29.6448	43.4927	26.236	-39.2838	3.50664	-23.3813														33.506	90.3494	102.367
14.45	17.8992	0.00868815	0.000666078	-30.9373	12.3863	34.0302	21.4605	13.3116	6.05732	36.2528	47.2632	28.1589	-39.6202	3.48217	-23.6771														40.5423	109.113	124.393
14.5	17.9611	0.00442479	0.000692268	-61.6072	6.46498	18.24	7.24929	7.22112	0.981889	17.7165	34.033	21.4115	-37.9833	3.60122	-22.238														20.8046	56.4788	62.6056
14.55	18.0179	0.00669473	0.00072627	-42.7846	9.61768	26.6471	14.8158	10.4639	3.6842	27.5858	42.1526	25.5525	-35.8581	3.75577	-20.3698														31.3135	84.5028	95.5033
14.6	18.0661	0.00571211	0.000757753	-49.9997	8.25293	23.0078	11.5404	9.06016	2.51442	23.3135	39.0402	23.9652	-33.8905	3.89888	-18.64														26.7644	72.3717	81.2625
14.65	18.1143	0.0086986	0.000769403	-30.8827	12.4008	34.0689	21.4953	13.3266	6.06976	36.2982	47.2867	28.1709	-33.1623	3.95183	-17.9998														40.5907	109.242	124.545
14.7	18.1624	0.00894609	0.00077493	-29.6075	12.7446	34.9855	22.3203	13.6801	6.36439	37.3743	47.8368	28.4514	-32.8169	3.97696	-17.6961														41.7365	112.297	128.132
14.75	18.2106	0.00903745	0.000775371	-29.1457	12.8715	35.3239	22.6248	13.8106	6.47315	37.7715	48.036	28.553	-32.7893	3.97896	-17.6719														42.1595	113.425	129.456
14.8	18.2588	0.0101624	0.000775815	-23.8131	14.4339	39.4903	26.3746	15.4177	7.81235	42.6625	50.3363	29.7262	-32.7615	3.98098	-17.6475														47.3675	127.313	145.759
14.85	18.307	0.00787699	0.000782806	-35.3925	11.2597	31.0259	18.7566	12.1528	5.09166	32.7261	45.3413	27.1787	-32.3246	4.01276	-17.2634														36.787	99.0987	112.638
14.9	18.3551	0.00746213	0.000784765	-37.8518	10.6835	29.4894	17.3738	11.5602	4.59778	30.9223	44.2804	26.6377	-32.2022	4.02166	-17.1558														34.8664	93.9769	106.625
14.95	18.4033	0.00841967	0.000792698	-32.3641	12.0134	33.0358	20.5656	12.9281	5.7377	35.0855	46.6477	27.845	-31.7064	4.05772	-16.7199														39.2994	105.798	120.502
15	18.4515	0.00854971	0.000789552	-31.6675	12.194	33.5174	20.999	13.1139	5.89251	35.6509	46.9482	27.9982	-31.903	4.04342	-16.8927														39.9014	107.404	122.387
15.05	18.4996	0.00717415	0.000803794	-39.6407	10.2835	28.4228	16.4138	11.1488	4.25495	29.6702	43.5087	26.2441	-31.0129	4.10816	-16.1102														33.5331	90.4217	102.452
15.1	18.5478	0.00785981	0.000792943	-35.4918	11.2358	30.9623	18.6994	12.1283	5.0712	32.6513	45.2985	27.1569	-31.6911	4.05883	-16.7064														36.7075	98.8865	112.389
15.15	18.596	0.008156	0.00079178	-33.8103	11.6472	32.0593	19.6867	12.5514	5.42381	33.9391	46.0238	27.5268	-31.7638	4.05354	-16.7703														38.0787	102.543	116.681
15.2	18.6442	0.0108199	0.000780218	-20.9634	15.3471	41.9255	28.5663	16.357	8.59511	45.5213	51.5656	30.3531	-32.4864	4.00099	-17.4056														50.4115	135.431	155.288
15.25	18.6923	0.010249	0.000745813	-23.4272	14.5542	39.8112	26.6634	15.5415	7.91551	43.0393	50.5028	29.8111	-34.6367	3.8446	-19.296														47.7687	128.383	147.015
15.3	18.7405	0.0106476	0.000722468	-21.693	15.1078	41.2874	27.992	16.1109	8.39001	44.7722	51.2509	30.1926	-36.0957	3.73849	-20.5787														49.6139	133.304	152.791
15.35	18.7887	0.0104429	0.000675233	-22.5754	14.8235	40.5293	27.3097	15.8184	8.14632	43.8822	50.8703	29.9985	-39.048	3.52378	-23.174														48.6662	130.777	149.825
15.4	18.8368	0.0108237	0.000630897	-20.9473	15.3524	41.9397	28.5791	16.3625	8.59967	45.5379	51.5726	30.3567	-41.8189	3.32226	-25.61														50.4293	135.478	155.344
15.45	18.885	0.0120925	0.000616014	-15.9089	17.1146	46.6389	32.8084	18.175	10.1101	51.0544	53.746	31.4651	-42.7491	3.25461	-26.4278														56.3033	151.142	173.732
15.5	18.9332	0.0103565	0.000637801	-22.9532	14.7034	40.2091	27.0215	15.6949	8.0434	43.5063	50.7073	29.9154	-41.3874	3.35364	-25.2307														48.266	129.709	148.572
15.55	18.9814	0.0129713	0.000676465	-12.7201	18.3351	49.8937	35.7377	19.4304	11.1563	54.8752	55.1216	32.1667	-38.9709	3.52939	-23.1063														60.3718	161.991	186.468
15.6	19.0295	0.0107605	0.000713215	-21.2137	15.2645	41.7054	28.3682	16.2721	8.52437	45.2629	51.4577	30.2981	-36.6741	3.69643	-21.0871														50.1364	134.697	154.427
15.65	19.0777	0.00773236	0.000739325	-36.2349	11.0588	30.4902	18.2745	11.9462	4.91948	32.0972	44.978	26.9934	-35.0422	3.81512	-19.6524														36.1174	97.3131	110.541
15.7	19.1259	0.00876171	0.000771267	-30.5541	12.4885	34.3026	21.7057	13.4167	6.14489	36.5726	47.4285	28.2432	-33.0458	3.9603	-17.8974														40.8829	110.021	125.46
15.75	19.1741	0.008581	0.00078958	-31.5014	12.2375	33.6333	21.1033	13.1586	5.92977	35.787	47.0198	28.0348	-31.9012	4.04355	-16.8912														40.0463	107.79	122.841
15.8	19.2222	0.00826196	0.000794501	-33.2236	11.7944	32.4517	20.0399	12.7028	5.54995	34.3998	46.2769	27.6559	-31.5937	4.06592	-16.6208														38.5693	103.851	118.217

## Sheet: M6
original data																													12.0107	15.9994	22.9897	24.305	26.9815	28.0855	30.9738	32.065	35.453	39.0983	40.078	47.867	50.942	51.9961	54.938	55.845	58.9332	58.6934	63.546	65.39	79.904
d	Spectrum	C	O	Na	Mg	Al	Si	P	S	Cl	K	Ca	Ti	V	Cr	Mn	Fe	Co	Ni	Cu	Zn	Br	Rb	Sr	Rh	Ba	Pb	trimmed	C	O	Na	Mg	Al	Si	P	S	Cl	K	Ca	Ti	V	Cr	Mn	Fe	Co	Ni	Cu	Zn	Br
0	Line_8_01	11.9299	47.9012	0.0377759	0.0506325	0.0074241	0.166429	0	0.00239155	0.135026	0	39.7218	0.0101655	0	0	0	0.0162478	0	0.000112957	0	0.000133582	0.0118394	0	0.00443997	0	0	0.00450998		11.9299	47.9012	0.0377759	0.0506325	0.0074241	0.166429		0.00239155	0.135026		39.7218	0.0101655				0.0162478		0.000112957		0.000133582	0.0118394
0.05	Line_8_02	11.9301	47.8576	0.131562	0.0249185	0.00427632	0.106123	0	0	0.136009	0	39.7648	0.00812115	0	0	0	0.0145173	0	0	0	0	0.01088	0	0.00480423	0	0	0.00636855		11.9301	47.8576	0.131562	0.0249185	0.00427632	0.106123			0.136009		39.7648	0.00812115				0.0145173					0.01088
0.1	Line_8_03	11.955	47.9026	0	0.0537807	0.00983823	0.0884646	0	0.00459688	0.143635	0	39.8003	0.00894395	0	0	0.000401448	0.0124104	0	0	0	0	0.0110412	0	0.0048336	0	0	0.00411517		11.955	47.9026		0.0537807	0.00983823	0.0884646		0.00459688	0.143635		39.8003	0.00894395			0.000401448	0.0124104					0.0110412
0.15	Line_8_04	11.9243	47.8827	0.0290695	0.0144128	0.0159455	0.158649	0	0.00155663	0.1485	0.00160025	39.7631	0.0221299	0	0	0.000474823	0.0190713	0	0	0	3.86207e-05	0.011179	0	0.00375444	0	0	0.00361798		11.9243	47.8827	0.0290695	0.0144128	0.0159455	0.158649		0.00155663	0.1485	0.00160025	39.7631	0.0221299			0.000474823	0.0190713				3.86207e-05	0.011179
0.2	Line_8_05	11.8519	47.8924	0.0760539	0.0459781	0.023093	0.377602	0	0.00412112	0.148073	0.00973319	39.4693	0.0374391	0	0	0.000402663	0.0443872	0	0.000208454	0	0	0.010367	0	0.00439715	0	0	0.00459396		11.8519	47.8924	0.0760539	0.0459781	0.023093	0.377602		0.00412112	0.148073	0.00973319	39.4693	0.0374391			0.000402663	0.0443872		0.000208454			0.010367
0.25	Line_8_06	11.7185	47.8772	0.172379	0.0225045	0.0391559	0.741109	0	0.00389232	0.141753	0.0234278	39.0633	0.0886231	0	0.000428638	0.00179802	0.0873935	0	0	0	0	0.00981299	0	0.00381092	0	0	0.00487805		11.7185	47.8772	0.172379	0.0225045	0.0391559	0.741109		0.00389232	0.141753	0.0234278	39.0633	0.0886231		0.000428638	0.00179802	0.0873935					0.00981299
0.3	Line_8_07	11.7077	47.9512	0	0.0226987	0.0499601	0.839439	0.000197069	0.0311654	0.118113	0.016914	39.0257	0.0922197	1.25593e-05	0	0.0119738	0.112143	0	0	0	0.00104256	0.00961472	0	0.0061578	0	0	0.00371217		11.7077	47.9512		0.0226987	0.0499601	0.839439	0.000197069	0.0311654	0.118113	0.016914	39.0257	0.0922197	1.25593e-05		0.0119738	0.112143				0.00104256	0.00961472
0.35	Line_8_08	11.762	48.0079	0	0.127313	0.0554605	0.63151	0.000102031	0.112008	0.0406452	0	39.0223	0.00509727	0.00693528	0	0.05031	0.109172	0.00529164	0	0	0.00554738	0.00810043	0	0.0323837	0	0.0138395	0.00419191		11.762	48.0079		0.127313	0.0554605	0.63151	0.000102031	0.112008	0.0406452		39.0223	0.00509727	0.00693528		0.05031	0.109172	0.00529164			0.00554738	0.00810043
0.4	Line_8_09	11.8603	47.9516	0.0444371	0.15519	0.0342585	0.227622	0.00068622	0.122218	0	0	39.2877	0	0.0160555	0	0.0780463	0.0852012	0.00705126	0	0	0.00705763	0.00611547	0	0.0691051	0	0.0441812	0.00322239		11.8603	47.9516	0.0444371	0.15519	0.0342585	0.227622	0.00068622	0.122218			39.2877		0.0160555		0.0780463	0.0852012	0.00705126			0.00705763	0.00611547
0.45	Line_8_10	11.8851	47.9522	0	0.178479	0.0289885	0.167669	0.000671636	0.108513	0	0	39.3225	0	0.010627	0	0.0934913	0.0994943	0.00223517	0	0.000564632	0.00544373	0.0050802	0	0.0897232	0	0.0472417	0.00192157		11.8851	47.9522		0.178479	0.0289885	0.167669	0.000671636	0.108513			39.3225		0.010627		0.0934913	0.0994943	0.00223517		0.000564632	0.00544373	0.0050802
0.5	Line_8_11	11.8807	47.9489	0.017956	0.166608	0.0345458	0.145052	0.00067506	0.117714	0	0	39.3241	0.0432339	0.0198286	0	0.0840493	0.0802622	0.000886474	0	0.000399087	0.00411582	0.0049208	0	0.0967778	0	0.026718	0.00255796		11.8807	47.9489	0.017956	0.166608	0.0345458	0.145052	0.00067506	0.117714			39.3241	0.0432339	0.0198286		0.0840493	0.0802622	0.000886474		0.000399087	0.00411582	0.0049208
0.55	Line_8_12	11.8604	47.9542	0.0969024	0.152074	0.0294811	0.17424	0.000352221	0.128338	0	0	39.2816	0.100763	0.00166367	0	0.0656678	0.0427652	0.00114567	0.00111269	0.000633459	0.00323598	0.00338654	0	0.0945975	0	0.00279804	0.00457555		11.8604	47.9542	0.0969024	0.152074	0.0294811	0.17424	0.000352221	0.128338			39.2816	0.100763	0.00166367		0.0656678	0.0427652	0.00114567	0.00111269	0.000633459	0.00323598	0.00338654
0.6	Line_8_13	11.8677	47.9719	0.0837964	0.220414	0.0264793	0.144578	0.00157632	0.143435	0	0	39.195	0.0874961	0	0	0.0816647	0.0654971	0.00404697	0	0.000791926	0.00249308	0.00131987	0	0.0905728	0	0.00318424	0.00808614		11.8677	47.9719	0.0837964	0.220414	0.0264793	0.144578	0.00157632	0.143435			39.195	0.0874961			0.0816647	0.0654971	0.00404697		0.000791926	0.00249308	0.00131987
0.65	Line_8_14	11.8669	47.9473	0.0340325	0.156924	0.0302188	0.128619	0.00242876	0.136357	0	0	39.2998	0.0907847	0.00522299	0	0.0936415	0.0973292	0.00233394	0	0.000147567	0.0027788	0.00112656	0	0.0842511	0	0.0153629	0.00444876		11.8669	47.9473	0.0340325	0.156924	0.0302188	0.128619	0.00242876	0.136357			39.2998	0.0907847	0.00522299		0.0936415	0.0973292	0.00233394		0.000147567	0.0027788	0.00112656
0.7	Line_8_15	11.9059	47.9495	0.0171864	0.105838	0.0238635	0.0872672	0.0022645	0.0980086	0	0	39.5162	0.0710707	0.00140349	0	0.0705302	0.0584977	0.00113175	0	0.000118352	0.00400837	0.000629055	0	0.0802361	0	0.00631	0		11.9059	47.9495	0.0171864	0.105838	0.0238635	0.0872672	0.0022645	0.0980086			39.5162	0.0710707	0.00140349		0.0705302	0.0584977	0.00113175		0.000118352	0.00400837	0.000629055
0.75	Line_8_16	11.9159	47.9383	0.042832	0.0587027	0.0303756	0.0820987	0.00240681	0.0748525	0	0	39.6283	0.0611363	0	0.00123701	0.0507043	0.0290045	0.000871589	0.00033781	0.000189619	0.00362979	0.00147422	0	0.0776827	0	0	0		11.9159	47.9383	0.042832	0.0587027	0.0303756	0.0820987	0.00240681	0.0748525			39.6283	0.0611363		0.00123701	0.0507043	0.0290045	0.000871589	0.00033781	0.000189619	0.00362979	0.00147422
0.8	Line_8_17	11.9249	47.9562	0.0342718	0.0891112	0.0279011	0.0979783	0.0028245	0.0676149	0	0	39.6087	0.0336609	0	0.00192854	0.0471697	0.0252907	0	0	0.000679156	0.00404851	0.00144161	0	0.0762512	0	0	0		11.9249	47.9562	0.0342718	0.0891112	0.0279011	0.0979783	0.0028245	0.0676149			39.6087	0.0336609		0.00192854	0.0471697	0.0252907			0.000679156	0.00404851	0.00144161
0.85	Line_8_18	11.9171	47.9861	0	0.10414	0.0326385	0.0966016	0.00145161	0.118512	0	0	39.5589	0.0271333	0	0.00224558	0.0465601	0.022848	0	0.00182884	0.00167015	0.00548244	0.000996715	0	0.0746566	0	0.00112493	0		11.9171	47.9861		0.10414	0.0326385	0.0966016	0.00145161	0.118512			39.5589	0.0271333		0.00224558	0.0465601	0.022848		0.00182884	0.00167015	0.00548244	0.000996715
0.9	Line_8_19	11.8937	47.9846	0	0.137254	0.0274572	0.0885804	0.000868515	0.155839	0	0	39.4263	0.0762536	0	0.00205433	0.075532	0.0464835	0.00184537	0	0.00134775	0.00594002	0.00178254	0	0.0742192	0	0	0		11.8937	47.9846		0.137254	0.0274572	0.0885804	0.000868515	0.155839			39.4263	0.0762536		0.00205433	0.075532	0.0464835	0.00184537		0.00134775	0.00594002	0.00178254
0.95	Line_8_20	11.8815	47.9567	0	0.0672031	0.0288426	0.101072	0.00154987	0.168689	0	0	39.5013	0.0266379	0.00164829	0.000677189	0.100527	0.0722424	0.00205935	0	0.00116321	0.00667383	0.00233415	0	0.0738449	0	0.0027286	0.00257861		11.8815	47.9567		0.0672031	0.0288426	0.101072	0.00154987	0.168689			39.5013	0.0266379	0.00164829	0.000677189	0.100527	0.0722424	0.00205935		0.00116321	0.00667383	0.00233415
1	Line_8_21	11.9079	47.9801	0	0.112472	0.0281869	0.10076	0.00159052	0.139727	0	0	39.5155	0	0.00367744	0	0.0786428	0.0423588	0.00290465	0	0.000401179	0.00343945	0.00209825	0	0.0723244	0	0.00355898	0.00424229		11.9079	47.9801		0.112472	0.0281869	0.10076	0.00159052	0.139727			39.5155		0.00367744		0.0786428	0.0423588	0.00290465		0.000401179	0.00343945	0.00209825
1.05	Line_8_22	11.9017	47.9473	0.0774218	0.173749	0.0331088	0.0716098	0.00165361	0.119225	0	0	39.3937	0	0.000264442	0	0.117781	0.0719224	0.00122002	0	0	0.00439427	0.00228961	0	0.0721764	0	0.00720974	0.00324261		11.9017	47.9473	0.0774218	0.173749	0.0331088	0.0716098	0.00165361	0.119225			39.3937		0.000264442		0.117781	0.0719224	0.00122002			0.00439427	0.00228961
1.1	Line_8_23	11.9166	47.9609	0.00117654	0.142615	0.0239258	0.0862058	0.000873685	0.102514	0	0	39.4953	0	0	0	0.110172	0.0722184	0.000189545	0	0.000509947	0.00594794	0.00244149	0	0.0714535	0	0.00457486	0.00232081		11.9166	47.9609	0.00117654	0.142615	0.0239258	0.0862058	0.000873685	0.102514			39.4953				0.110172	0.0722184	0.000189545		0.000509947	0.00594794	0.00244149
1.15	Line_8_24	11.9028	47.9806	0	0.140718	0.032045	0.106941	0.00130258	0.138876	0	0	39.4522	0	0	0	0.0954924	0.0573388	0.00159281	0	0.00104745	0.00444461	0.00216978	0	0.0717486	0	0.00948782	0.00118644		11.9028	47.9806		0.140718	0.032045	0.106941	0.00130258	0.138876			39.4522				0.0954924	0.0573388	0.00159281		0.00104745	0.00444461	0.00216978
1.2	Line_8_25	11.8649	48.0158	4.83607e-05	0.166702	0.0310606	0.114155	0.000562622	0.245441	0	0	39.2833	0.0200397	0	0	0.104772	0.0701859	0.00184103	0.000306741	0.00250654	0.00376651	0.00166982	0	0.0706062	0	0.00195177	0.000450372		11.8649	48.0158	4.83607e-05	0.166702	0.0310606	0.114155	0.000562622	0.245441			39.2833	0.0200397			0.104772	0.0701859	0.00184103	0.000306741	0.00250654	0.00376651	0.00166982
1.25	Line_8_26	11.8839	48.0091	0	0.15651	0.0284131	0.125128	0.000179501	0.20036	0	0	39.3636	0	0.00273413	0	0.0840258	0.0553614	0.00129858	0.000826231	0.00289939	0.00382751	0.00191019	0	0.0705007	0	0.00866385	0.000724886		11.8839	48.0091		0.15651	0.0284131	0.125128	0.000179501	0.20036			39.3636		0.00273413		0.0840258	0.0553614	0.00129858	0.000826231	0.00289939	0.00382751	0.00191019
1.3	Line_8_27	11.8874	47.9489	0.113599	0.11882	0.0272151	0.151052	0.00126098	0.115488	0	0	39.4377	0	0.0104186	0	0.0535592	0.0347529	0	0.0015502	0.00267588	0.00269098	0.00199009	0	0.06981	0	0.019366	0.00172538		11.8874	47.9489	0.113599	0.11882	0.0272151	0.151052	0.00126098	0.115488			39.4377		0.0104186		0.0535592	0.0347529		0.0015502	0.00267588	0.00269098	0.00199009
1.35	Line_8_28	11.8769	47.9577	0	0.0586419	0.032128	0.212029	0.00266572	0.113872	0.00940863	0	39.5018	0	0.00381502	0	0.0811001	0.0577981	0	0.00123512	0.00294923	0.00284861	0.00164422	0	0.0701194	0	0.0105643	0.00285688		11.8769	47.9577		0.0586419	0.032128	0.212029	0.00266572	0.113872	0.00940863		39.5018		0.00381502		0.0811001	0.0577981		0.00123512	0.00294923	0.00284861	0.00164422
1.4	Line_8_29	11.8951	47.912	0.105471	0.086798	0.0275801	0.112991	0.00298091	0.084811	0.0126467	0	39.5161	0	0	0.000377573	0.0871927	0.0647851	5.04814e-05	0.000952516	0.00274265	0.00419247	0.000803737	0	0.0698446	0	0.00801622	0.00452071		11.8951	47.912	0.105471	0.086798	0.0275801	0.112991	0.00298091	0.084811	0.0126467		39.5161			0.000377573	0.0871927	0.0647851	5.04814e-05	0.000952516	0.00274265	0.00419247	0.000803737
1.45	Line_8_30	11.9222	47.9194	0.0835913	0.109588	0.0284143	0.0941127	0.0028772	0.050565	0.0117868	0	39.5688	0	0	0.000358669	0.0611116	0.0261902	0.00425704	0.00030099	0.002901	0.00479369	0.000986379	0	0.0702144	0	0.0361585	0.00145786		11.9222	47.9194	0.0835913	0.109588	0.0284143	0.0941127	0.0028772	0.050565	0.0117868		39.5688			0.000358669	0.0611116	0.0261902	0.00425704	0.00030099	0.002901	0.00479369	0.000986379
1.5	Line_8_31	11.9246	47.9262	0.0105939	0.104836	0.0240317	0.083386	0.00311879	0.0670344	0.0200345	0	39.5849	0	0.00363649	0	0.0739752	0.0479213	0.0032593	0.000686826	0.00302785	0.00350069	0.000801779	0	0.0699172	0	0.0444011	0.000151551		11.9246	47.9262	0.0105939	0.104836	0.0240317	0.083386	0.00311879	0.0670344	0.0200345		39.5849		0.00363649		0.0739752	0.0479213	0.0032593	0.000686826	0.00302785	0.00350069	0.000801779
1.55	Line_8_32	11.8978	47.9541	0	0.131623	0.0374856	0.113003	0.00162721	0.120239	0.0140049	0	39.4523	0	0.00575976	0	0.100185	0.0731224	0.0030227	0	0.000944749	0.00322956	0.000951092	0	0.0675732	0	0.0216853	0.00137603		11.8978	47.9541		0.131623	0.0374856	0.113003	0.00162721	0.120239	0.0140049		39.4523		0.00575976		0.100185	0.0731224	0.0030227		0.000944749	0.00322956	0.000951092
1.6	Line_8_33	11.887	47.9215	0.0953952	0.0856056	0.0295989	0.0823224	0.00228556	0.130735	0.0422895	0	39.4921	0.0420913	0	8.06093e-05	0.072366	0.0379241	0.00213288	0	0.00104201	0.00422768	0.00145445	0	0.0677593	0	0	0.00203407		11.887	47.9215	0.0953952	0.0856056	0.0295989	0.0823224	0.00228556	0.130735	0.0422895		39.4921	0.0420913		8.06093e-05	0.072366	0.0379241	0.00213288		0.00104201	0.00422768	0.00145445
1.65	Line_8_34	11.8902	47.8979	0.106678	0.0898073	0.0323239	0.0566266	0.00281387	0.116207	0.080626	0.00823773	39.4951	0.0774461	0	0.000871391	0.049953	0.0108643	0.0043618	0.000253865	0.00131561	0.00337308	0.00107155	0	0.0694074	0	0	0.00457598		11.8902	47.8979	0.106678	0.0898073	0.0323239	0.0566266	0.00281387	0.116207	0.080626	0.00823773	39.4951	0.0774461		0.000871391	0.049953	0.0108643	0.0043618	0.000253865	0.00131561	0.00337308	0.00107155
1.7	Line_8_35	11.8539	47.8088	0.258082	0.0327639	0.0260533	0.102183	0.00289571	0.0885448	0.122453	0.0255728	39.4681	0.0710344	0	0.00427274	0.0456832	0.00767671	0.00299137	0.0009381	0.000932834	0.00368849	0.000513951	0	0.0691294	0	0	0.00381544		11.8539	47.8088	0.258082	0.0327639	0.0260533	0.102183	0.00289571	0.0885448	0.122453	0.0255728	39.4681	0.0710344		0.00427274	0.0456832	0.00767671	0.00299137	0.0009381	0.000932834	0.00368849	0.000513951
1.75	Line_8_36	11.8873	47.8998	0.164623	0.0978367	0.0361419	0.0894641	0.00250857	0.0966908	0.0579518	0.00139755	39.472	0.0505239	0	0.00509819	0.0462179	0.0124906	0.00175149	0.000949957	0.000908514	0.0028415	0.000256563	0	0.0699512	0	0	0.00326028		11.8873	47.8998	0.164623	0.0978367	0.0361419	0.0894641	0.00250857	0.0966908	0.0579518	0.00139755	39.472	0.0505239		0.00509819	0.0462179	0.0124906	0.00175149	0.000949957	0.000908514	0.0028415	0.000256563
1.8	Line_8_37	11.9097	47.9514	0	0.0984124	0.0227292	0.0989244	0.00243965	0.100943	0.0114826	0	39.5456	0.0231955	0	0.00178289	0.078567	0.0685453	0	0.000531606	0.000123327	0.00187483	0.000372429	0	0.0705604	0	0.0109201	0.00187533		11.9097	47.9514		0.0984124	0.0227292	0.0989244	0.00243965	0.100943	0.0114826		39.5456	0.0231955		0.00178289	0.078567	0.0685453		0.000531606	0.000123327	0.00187483	0.000372429
1.85	Line_8_38	11.9289	47.9687	0	0.142751	0.0281611	0.081958	0.00129636	0.0806475	0	0	39.5365	0.0143547	0	0.00459821	0.0706585	0.0546603	0.00125878	0	0.000350251	0.00622246	0.00283137	0	0.0701029	0	0.000720478	0.00532672		11.9289	47.9687		0.142751	0.0281611	0.081958	0.00129636	0.0806475			39.5365	0.0143547		0.00459821	0.0706585	0.0546603	0.00125878		0.000350251	0.00622246	0.00283137
1.9	Line_8_39	11.9339	47.9867	0.00420942	0.142439	0.0332767	0.0977139	0.00140665	0.0827836	0	0	39.5535	0.00346563	0	0.00869578	0.0456838	0.0150584	0.00390019	0	0.000362424	0.00722178	0.00340849	0	0.0710242	0	0	0.00529129		11.9339	47.9867	0.00420942	0.142439	0.0332767	0.0977139	0.00140665	0.0827836			39.5535	0.00346563		0.00869578	0.0456838	0.0150584	0.00390019		0.000362424	0.00722178	0.00340849
1.95	Line_8_40	11.9201	47.966	0	0.117577	0.0311878	0.0882564	0.0021543	0.0996744	0	0	39.5481	0	0	0.00257771	0.0797364	0.0570947	0.00242115	0	0.000357004	0.00509254	0.00162342	0	0.0712754	0	0.00509076	0.00173972		11.9201	47.966		0.117577	0.0311878	0.0882564	0.0021543	0.0996744			39.5481			0.00257771	0.0797364	0.0570947	0.00242115		0.000357004	0.00509254	0.00162342
2	Line_8_41	11.8884	47.9009	0.180886	0.110516	0.025041	0.0700316	0.0018048	0.108245	0	0	39.4549	0	0	0	0.0983869	0.0753353	0.00260643	0	0.000482912	0.0066699	0.00235701	0	0.0697047	0	0.0034133	0.000376258		11.8884	47.9009	0.180886	0.110516	0.025041	0.0700316	0.0018048	0.108245			39.4549				0.0983869	0.0753353	0.00260643		0.000482912	0.0066699	0.00235701
2.05	Line_8_42	11.9179	47.9853	0	0.136699	0.0349704	0.0859606	0.00177348	0.123779	0	0	39.5106	0	0	0	0.0794448	0.0399569	0.00354866	0	3.71417e-05	0.00773892	0.00218566	0	0.0688072	0	0.000380031	0.000911855		11.9179	47.9853		0.136699	0.0349704	0.0859606	0.00177348	0.123779			39.5106				0.0794448	0.0399569	0.00354866		3.71417e-05	0.00773892	0.00218566
2.1	Line_8_43	11.9026	47.9734	0	0.106231	0.020458	0.0984699	0.00124393	0.14563	0	0	39.5096	0.00507742	0	0	0.0972709	0.0577593	0.00067002	0	0.000415905	0.00616446	0.00155013	0	0.0686514	0	0.00304629	0.00178062		11.9026	47.9734		0.106231	0.020458	0.0984699	0.00124393	0.14563			39.5096	0.00507742			0.0972709	0.0577593	0.00067002		0.000415905	0.00616446	0.00155013
2.15	Line_8_44	11.88	47.9632	0	0.0950917	0.0272332	0.0858207	0.00109411	0.183973	0	0	39.4529	0.0218568	0.000245762	0	0.115131	0.0913297	0.000685452	0	0.000204269	0.00580479	0.000805511	0	0.0685614	0	0.00411793	0.00196217		11.88	47.9632		0.0950917	0.0272332	0.0858207	0.00109411	0.183973			39.4529	0.0218568	0.000245762		0.115131	0.0913297	0.000685452		0.000204269	0.00580479	0.000805511
2.2	Line_8_45	11.8887	47.9879	0	0.124976	0.0277584	0.0843506	0.00153411	0.192005	0	0	39.4322	0.0225722	0.000841108	0	0.0792408	0.0642229	0.00717076	0	0.00127928	0.00692363	0.000716871	0	0.0688798	0	0.00430555	0.00447201		11.8887	47.9879		0.124976	0.0277584	0.0843506	0.00153411	0.192005			39.4322	0.0225722	0.000841108		0.0792408	0.0642229	0.00717076		0.00127928	0.00692363	0.000716871
2.25	Line_8_46	11.8069	48.0514	0.00432547	0.111343	0.0307928	0.0919254	0.00171233	0.407405	0	0	39.1813	0.154615	0.000588173	0	0.0344353	0.0175217	0.0177864	0	0.000745959	0.00441039	0.000658487	0	0.0701159	0	0.0047732	0.00728049		11.8069	48.0514	0.00432547	0.111343	0.0307928	0.0919254	0.00171233	0.407405			39.1813	0.154615	0.000588173		0.0344353	0.0175217	0.0177864		0.000745959	0.00441039	0.000658487
2.3	Line_8_47	11.8233	48.0501	0	0.0984523	0.0281384	0.0777788	0.00177461	0.384503	0	0	39.2575	0.150652	0	0.000441889	0.0235556	0.00180947	0.0198016	0.000988688	0.00104415	0.00347378	0.000235163	0	0.0699158	0	0	0.00648363		11.8233	48.0501		0.0984523	0.0281384	0.0777788	0.00177461	0.384503			39.2575	0.150652		0.000441889	0.0235556	0.00180947	0.0198016	0.000988688	0.00104415	0.00347378	0.000235163
2.35	Line_8_48	11.8992	47.9976	0.0134002	0.0981304	0.0298499	0.0979349	0.00228502	0.168251	0	0	39.5111	0.0595222	0.000573556	0.000350109	0.025437	0.000139174	0.0175448	0	0	0.00370741	0.000204918	0	0.0697271	0	0	0.00502662		11.8992	47.9976	0.0134002	0.0981304	0.0298499	0.0979349	0.00228502	0.168251			39.5111	0.0595222	0.000573556	0.000350109	0.025437	0.000139174	0.0175448			0.00370741	0.000204918
2.4	Line_8_49	11.9464	47.9793	0	0.0929504	0.0271564	0.0853266	0.00181831	0.0709977	0	0	39.6768	0	0.000754096	2.00757e-05	0.0271408	0.00057707	0.0134997	0.00048914	0	0.00366054	0.00011075	0	0.0705461	0	0	0.00241683		11.9464	47.9793		0.0929504	0.0271564	0.0853266	0.00181831	0.0709977			39.6768		0.000754096	2.00757e-05	0.0271408	0.00057707	0.0134997	0.00048914		0.00366054	0.00011075
2.45	Line_8_50	11.9457	47.9566	0	0.0254539	0.0251575	0.0740444	0.00129209	0.0632047	0	0	39.7862	0.0063608	0	0	0.0327292	0.00244547	0.0038963	0.00235172	0	0.00314151	0.00103127	0	0.0697508	0	0	0.000633877		11.9457	47.9566		0.0254539	0.0251575	0.0740444	0.00129209	0.0632047			39.7862	0.0063608			0.0327292	0.00244547	0.0038963	0.00235172		0.00314151	0.00103127
2.5	Line_8_51	11.9421	47.9585	0.041852	0.0743358	0.0265118	0.0747869	0.00150955	0.0631954	0	0	39.6937	0	0	0	0.0328796	0.00801924	0	0.00593092	0	0.00338841	0.000630937	0	0.0693834	0	0.00249118	0.000836584		11.9421	47.9585	0.041852	0.0743358	0.0265118	0.0747869	0.00150955	0.0631954			39.6937				0.0328796	0.00801924		0.00593092		0.00338841	0.000630937
2.55	Line_8_52	11.9482	47.972	0	0.0803909	0.0164079	0.075128	0.00151591	0.0703335	0.00506479	0	39.7039	0	0	0	0.0332611	0.0106913	0	0.00571178	0	0.0052679	0.00038333	0	0.0701919	0	0	0.00152096		11.9482	47.972		0.0803909	0.0164079	0.075128	0.00151591	0.0703335	0.00506479		39.7039				0.0332611	0.0106913		0.00571178		0.0052679	0.00038333
2.6	Line_8_53	11.9219	47.9698	0	0.0966956	0.0247326	0.111624	0.0014785	0.092164	0.00436994	0	39.589	0	0.000664132	0.00144606	0.0581901	0.0426851	0.000132594	0.00146385	0.000745406	0.0062458	1.53241e-05	0	0.0704719	0	0.0041806	0.00203751		11.9219	47.9698		0.0966956	0.0247326	0.111624	0.0014785	0.092164	0.00436994		39.589		0.000664132	0.00144606	0.0581901	0.0426851	0.000132594	0.00146385	0.000745406	0.0062458	1.53241e-05
2.65	Line_8_54	11.9046	47.9407	0	0.0333761	0.0241671	0.105198	0.00187673	0.113519	0	0	39.6357	0	0.00417355	0.00189449	0.0789908	0.0637686	0.001062	0.000493224	0.00140791	0.00364806	0	0	0.0700991	0	0.012302	0.00307396		11.9046	47.9407		0.0333761	0.0241671	0.105198	0.00187673	0.113519			39.6357		0.00417355	0.00189449	0.0789908	0.0637686	0.001062	0.000493224	0.00140791	0.00364806
2.7	Line_8_55	11.9058	47.9438	0.0775048	0.0737614	0.0231242	0.07948	0.00197462	0.129178	0.00809782	0	39.5732	0	0.0056485	0	0.0572069	0.0291998	0.00298534	0.000725726	0.00115097	0.00470845	4.49402e-05	0	0.0702533	0	0.00953374	0.00268624		11.9058	47.9438	0.0775048	0.0737614	0.0231242	0.07948	0.00197462	0.129178	0.00809782		39.5732		0.0056485		0.0572069	0.0291998	0.00298534	0.000725726	0.00115097	0.00470845	4.49402e-05
2.75	Line_8_56	11.8547	48.0123	0	0.0505049	0.0279567	0.0692044	0.00109426	0.311366	0	0	39.4411	0.0701126	0.0125605	0	0.047498	0.0126769	0.00914123	0	0.000358556	0.00354581	0.000395552	0	0.0700731	0	0.00104491	0.00436707		11.8547	48.0123		0.0505049	0.0279567	0.0692044	0.00109426	0.311366			39.4411	0.0701126	0.0125605		0.047498	0.0126769	0.00914123		0.000358556	0.00354581	0.000395552
2.8	Line_8_57	11.847	48.0505	0	0.11554	0.0252377	0.0720903	0.00157262	0.354083	0	0	39.3089	0.0778395	0	0.000386641	0.0456869	0.0101203	0.01272	0	0.000677783	0.00346037	0.000562546	0	0.0682379	0	0	0.00539863		11.847	48.0505		0.11554	0.0252377	0.0720903	0.00157262	0.354083			39.3089	0.0778395		0.000386641	0.0456869	0.0101203	0.01272		0.000677783	0.00346037	0.000562546
2.85	Line_8_58	11.8648	48.0183	0	0.119988	0.0353109	0.0902312	0.00248563	0.266387	0	0	39.3609	0.0479607	0	0.00159228	0.0696863	0.0314976	0.012741	0	0.000116216	0.00424484	0.000828197	0	0.0690203	0	0	0.00388331		11.8648	48.0183		0.119988	0.0353109	0.0902312	0.00248563	0.266387			39.3609	0.0479607		0.00159228	0.0696863	0.0314976	0.012741		0.000116216	0.00424484	0.000828197
2.9	Line_8_59	11.8536	47.8949	0.177353	0.0521519	0.028856	0.0875958	0.00141244	0.177141	0.0188162	0	39.4358	0.019219	0.00170101	0	0.0990202	0.0650617	0.00893191	0	0.000617465	0.00683345	0.00136448	0	0.0679723	0	0	0.00164525		11.8536	47.8949	0.177353	0.0521519	0.028856	0.0875958	0.00141244	0.177141	0.0188162		39.4358	0.019219	0.00170101		0.0990202	0.0650617	0.00893191		0.000617465	0.00683345	0.00136448
2.95	Line_8_60	11.879	47.8842	0.126182	0.0198067	0.028651	0.0806747	0.00237869	0.129858	0.0545732	0.00518067	39.5735	0.0221047	0	4.31427e-06	0.0728467	0.0375517	0.00586423	0	0.000182742	0.00607132	0.00208362	0	0.068602	0	0	0.000689816		11.879	47.8842	0.126182	0.0198067	0.028651	0.0806747	0.00237869	0.129858	0.0545732	0.00518067	39.5735	0.0221047		4.31427e-06	0.0728467	0.0375517	0.00586423		0.000182742	0.00607132	0.00208362
3	Line_8_61	11.8812	47.9095	0.124756	0.0633275	0.0256089	0.0687081	0.00326586	0.151294	0.0525901	0.00980847	39.5088	0.0456884	0	0.00188355	0.0489766	0.0130888	0.0117573	0	0.00149302	0.00609666	0.002439	0	0.0689915	0	0	0.000752399		11.8812	47.9095	0.124756	0.0633275	0.0256089	0.0687081	0.00326586	0.151294	0.0525901	0.00980847	39.5088	0.0456884		0.00188355	0.0489766	0.0130888	0.0117573		0.00149302	0.00609666	0.002439
3.05	Line_8_62	11.885	47.9691	0.0284438	0.0705315	0.0244222	0.0698723	0.00257252	0.199877	0.0196199	0	39.5087	0.0494294	0	0.00102307	0.0607876	0.0186102	0.0111525	0	0.00143628	0.00565125	0.00247302	0	0.071047	0	0	0.000225917		11.885	47.9691	0.0284438	0.0705315	0.0244222	0.0698723	0.00257252	0.199877	0.0196199		39.5087	0.0494294		0.00102307	0.0607876	0.0186102	0.0111525		0.00143628	0.00565125	0.00247302
3.1	Line_8_63	11.9075	47.9524	0	0.117955	0.0270908	0.0633972	0.00186825	0.118338	0	0	39.5056	0.0406431	0	0.00041955	0.11037	0.0724401	0.00308263	0	0.000452304	0.00424434	0.00222415	0	0.0715634	0	0	0.000401356		11.9075	47.9524		0.117955	0.0270908	0.0633972	0.00186825	0.118338			39.5056	0.0406431		0.00041955	0.11037	0.0724401	0.00308263		0.000452304	0.00424434	0.00222415
3.15	Line_8_64	11.908	47.9419	0	0.0692976	0.0185178	0.0718789	0.000750946	0.108007	0	0	39.5879	0.058865	0	0.00070011	0.0966804	0.0597149	0.001071	0	0.00127004	0.00260231	0.00237775	0	0.0704398	0	0	0		11.908	47.9419		0.0692976	0.0185178	0.0718789	0.000750946	0.108007			39.5879	0.058865		0.00070011	0.0966804	0.0597149	0.001071		0.00127004	0.00260231	0.00237775
3.2	Line_8_65	11.9048	47.9623	0.0760416	0.127316	0.0317015	0.0943919	0.00159691	0.102499	0	0	39.4812	0.0734481	0	0.00238211	0.0530034	0.0102703	0.000851696	0	0.0016479	0.00258404	0.00309788	0	0.070815	0	0	3.28099e-05		11.9048	47.9623	0.0760416	0.127316	0.0317015	0.0943919	0.00159691	0.102499			39.4812	0.0734481		0.00238211	0.0530034	0.0102703	0.000851696		0.0016479	0.00258404	0.00309788
3.25	Line_8_66	11.9084	47.9738	0	0.0594366	0.0273081	0.100796	0.00146599	0.123037	0	0	39.6051	0.0646006	0	0.00173155	0.0469966	0.00366806	0.00289263	0	0.00166034	0.00299887	0.00357027	0	0.0713977	0	0	0.00108344		11.9084	47.9738		0.0594366	0.0273081	0.100796	0.00146599	0.123037			39.6051	0.0646006		0.00173155	0.0469966	0.00366806	0.00289263		0.00166034	0.00299887	0.00357027
3.3	Line_8_67	11.9239	47.9999	0	0.150836	0.0303701	0.103361	0.000834149	0.107897	0	0	39.5059	0.0357844	0	0.000901348	0.0528935	0.00327723	0.00526086	5.04988e-06	0.00101152	0.00387673	0.00200442	0	0.0719163	0	0	0		11.9239	47.9999		0.150836	0.0303701	0.103361	0.000834149	0.107897			39.5059	0.0357844		0.000901348	0.0528935	0.00327723	0.00526086	5.04988e-06	0.00101152	0.00387673	0.00200442
3.35	Line_8_68	11.9236	47.9706	0	0.0562263	0.0298572	0.0929003	0.00239164	0.100969	0.000633874	0	39.6601	0.0245806	0	0.00249137	0.047461	0.00402094	0.00177768	0	0.000661991	0.00684313	0.00133483	0	0.0735684	0	0	0		11.9236	47.9706		0.0562263	0.0298572	0.0929003	0.00239164	0.100969	0.000633874		39.6601	0.0245806		0.00249137	0.047461	0.00402094	0.00177768		0.000661991	0.00684313	0.00133483
3.4	Line_8_69	11.9288	47.9573	0	0.0848838	0.0231594	0.0809438	0.00286919	0.0787814	0.0172052	0.0097546	39.63	0.0477622	0	0	0.0442958	0.0108553	0.00092893	0	0.000477328	0.0064376	0.00170454	0	0.0738998	0	0	0		11.9288	47.9573		0.0848838	0.0231594	0.0809438	0.00286919	0.0787814	0.0172052	0.0097546	39.63	0.0477622			0.0442958	0.0108553	0.00092893		0.000477328	0.0064376	0.00170454
3.45	Line_8_70	11.9248	47.9801	0	0.110951	0.0284066	0.0810487	0.0013817	0.107201	0	0.00306299	39.5729	0.0281108	0	0.00109053	0.0577459	0.0200455	0.00107331	0.000264844	0	0.00397921	0.00203374	0	0.0755233	0	0.000233481	0		11.9248	47.9801		0.110951	0.0284066	0.0810487	0.0013817	0.107201		0.00306299	39.5729	0.0281108		0.00109053	0.0577459	0.0200455	0.00107331	0.000264844		0.00397921	0.00203374
3.5	Line_8_71	11.8956	47.9779	0	0.092172	0.0238937	0.0778543	0.00101074	0.181434	0	0	39.5062	0.013255	0.000217225	0.000559442	0.0900602	0.0478716	0.00121758	0	0.000218366	0.00539045	0.00201703	0	0.0758185	0	0.00712861	0.000227913		11.8956	47.9779		0.092172	0.0238937	0.0778543	0.00101074	0.181434			39.5062	0.013255	0.000217225	0.000559442	0.0900602	0.0478716	0.00121758		0.000218366	0.00539045	0.00201703
3.55	Line_8_72	11.8182	48.0381	0	0.112907	0.0239211	0.0635247	0.00136357	0.41395	0	0	39.2138	0.078521	0.00435224	0	0.0733303	0.0415581	0.0118323	0	0.000353777	0.0031134	0.000993789	0	0.0758747	0	0.0225793	0.00166141		11.8182	48.0381		0.112907	0.0239211	0.0635247	0.00136357	0.41395			39.2138	0.078521	0.00435224		0.0733303	0.0415581	0.0118323		0.000353777	0.0031134	0.000993789
3.6	Line_8_73	11.8738	48.0166	0.0514737	0.15154	0.0282045	0.0815841	0.00184123	0.249263	0	0	39.3354	0.0511986	0	0.000956101	0.0484392	0.0121011	0.0112497	0	0.000192247	0.00239457	0.00100563	0	0.076284	0	0.00556542	0.00095304		11.8738	48.0166	0.0514737	0.15154	0.0282045	0.0815841	0.00184123	0.249263			39.3354	0.0511986		0.000956101	0.0484392	0.0121011	0.0112497		0.000192247	0.00239457	0.00100563
3.65	Line_8_74	11.9135	48.0177	0	0.168841	0.0258961	0.0813632	0.00220526	0.171227	0	0	39.4397	0.0158801	0	0.000798491	0.0564122	0.0119514	0.00558636	0	0.000309926	0.00239927	0.00130615	0	0.0756762	0	0.00820625	0.00107312		11.9135	48.0177		0.168841	0.0258961	0.0813632	0.00220526	0.171227			39.4397	0.0158801		0.000798491	0.0564122	0.0119514	0.00558636		0.000309926	0.00239927	0.00130615
3.7	Line_8_75	11.9063	47.9983	0	0.164938	0.0288552	0.0881868	0.00187628	0.16825	0	0	39.4231	0	0	0.000760449	0.0707964	0.0276043	0.00253484	0	0.00134394	0.0023476	0.00193245	0	0.0736782	0	0.0344157	0.00476751		11.9063	47.9983		0.164938	0.0288552	0.0881868	0.00187628	0.16825			39.4231			0.000760449	0.0707964	0.0276043	0.00253484		0.00134394	0.0023476	0.00193245
3.75	Line_8_76	11.9123	47.9955	0	0.149353	0.0306648	0.100732	0.00218762	0.146666	0.00205038	0	39.469	0	0	0.000270858	0.0533896	0.012732	0.00127541	0	0.000581532	0.00413946	0.00169227	0	0.0732618	0	0.039415	0.00476113		11.9123	47.9955		0.149353	0.0306648	0.100732	0.00218762	0.146666	0.00205038		39.469			0.000270858	0.0533896	0.012732	0.00127541		0.000581532	0.00413946	0.00169227
3.8	Line_8_77	11.9182	48.008	0	0.100607	0.0251525	0.0801716	0.00234634	0.1656	0	0	39.5687	0.00477933	0	0.000837702	0.0344259	0.00177637	0.00415584	7.49718e-05	0.000860641	0.00294727	0.000561822	0	0.0737655	0	0.00547641	0.00158298		11.9182	48.008		0.100607	0.0251525	0.0801716	0.00234634	0.1656			39.5687	0.00477933		0.000837702	0.0344259	0.00177637	0.00415584	7.49718e-05	0.000860641	0.00294727	0.000561822
3.85	Line_8_78	11.9285	47.9862	0	0.0761172	0.0310351	0.0913319	0.0021694	0.109298	0	0	39.6433	0.00857386	0	0.00264054	0.036724	0.00283513	0.0026888	0	0.000190438	0.0034611	0	0	0.0738327	0	0	0.00116278		11.9285	47.9862		0.0761172	0.0310351	0.0913319	0.0021694	0.109298			39.6433	0.00857386		0.00264054	0.036724	0.00283513	0.0026888		0.000190438	0.0034611
3.9	Line_8_79	11.9276	48.0068	0	0.174871	0.0255485	0.077161	0.00119964	0.131529	0	0	39.4786	0	0	0.00101603	0.0772983	0.0202602	0.0004428	0	0.00157121	0.00387817	0.000313099	0	0.0715079	0	0	0.000484383		11.9276	48.0068		0.174871	0.0255485	0.077161	0.00119964	0.131529			39.4786			0.00101603	0.0772983	0.0202602	0.0004428		0.00157121	0.00387817	0.000313099
3.95	Line_8_80	11.9193	47.9769	0	0.0811164	0.0230883	0.0662209	0.000979677	0.140198	0	0	39.6065	0.00692004	0.000246448	0	0.0763903	0.0222396	0.000343718	0.000182625	0.00283663	0.00344905	0.0012467	0	0.0697048	0	0.00204127	0		11.9193	47.9769		0.0811164	0.0230883	0.0662209	0.000979677	0.140198			39.6065	0.00692004	0.000246448		0.0763903	0.0222396	0.000343718	0.000182625	0.00283663	0.00344905	0.0012467
4	Line_8_81	11.8941	48.0074	0	0.0917438	0.0283245	0.101308	0.00113583	0.193378	0	0	39.5044	0.0418378	0	0.00104604	0.0376769	0.00638523	0	0	0.00320809	0.00299121	0.000661673	0	0.0706729	0	0.00797849	0.00576993		11.8941	48.0074		0.0917438	0.0283245	0.101308	0.00113583	0.193378			39.5044	0.0418378		0.00104604	0.0376769	0.00638523			0.00320809	0.00299121	0.000661673
4.05	Line_8_82	11.8263	48.0504	0	0.0626222	0.0281776	0.0963532	0.00105468	0.383492	0	0	39.3255	0.100076	0	0.000622523	0.0333091	0.00223384	0	0.00139487	0.00552876	0.00239417	0.00024743	0	0.0716993	0	0.00244388	0.0061686		11.8263	48.0504		0.0626222	0.0281776	0.0963532	0.00105468	0.383492			39.3255	0.100076		0.000622523	0.0333091	0.00223384		0.00139487	0.00552876	0.00239417	0.00024743
4.1	Line_8_83	11.8475	48.0159	0	0.058233	0.025787	0.0740705	0.00176714	0.313245	0	0	39.403	0.102445	0	0	0.0565882	0.0142092	0.000359594	0	0.00518868	0.00154363	0.00134754	0	0.0729943	0	0.00232298	0.00344646		11.8475	48.0159		0.058233	0.025787	0.0740705	0.00176714	0.313245			39.403	0.102445			0.0565882	0.0142092	0.000359594		0.00518868	0.00154363	0.00134754
4.15	Line_8_84	11.8889	47.9813	0	0.0697025	0.0233374	0.0828979	0.000849614	0.187052	0	0	39.5224	0.0589031	0	0	0.074222	0.0306088	0	5.10881e-05	0.00239118	0.00126051	0.00295665	0	0.0726404	0	0	0.000537249		11.8889	47.9813		0.0697025	0.0233374	0.0828979	0.000849614	0.187052			39.5224	0.0589031			0.074222	0.0306088		5.10881e-05	0.00239118	0.00126051	0.00295665
4.2	Line_8_85	11.847	48.0184	0.0921607	0.0865013	0.0235796	0.0838941	0.00104893	0.326225	0	0	39.3552	0.0252426	0	0	0.0469587	0.0125971	0	0.00229571	0.00168096	0.00174582	0.00333718	0	0.0720648	0	0	0		11.847	48.0184	0.0921607	0.0865013	0.0235796	0.0838941	0.00104893	0.326225			39.3552	0.0252426			0.0469587	0.0125971		0.00229571	0.00168096	0.00174582	0.00333718
4.25	Line_8_86	11.8279	47.9893	0.200954	0.0987041	0.0314317	0.10285	0.00114221	0.312006	0	0	39.2697	0.038224	0	0	0.0416338	0.000856194	0	0.00266266	0.00223493	0.00144167	0.0036387	0	0.0753183	0	0	0		11.8279	47.9893	0.200954	0.0987041	0.0314317	0.10285	0.00114221	0.312006			39.2697	0.038224			0.0416338	0.000856194		0.00266266	0.00223493	0.00144167	0.0036387
4.3	Line_8_87	11.9115	47.981	0.0335783	0.0995755	0.027323	0.0817151	0.00154823	0.134189	0	0	39.5469	0.0487452	0	6.84805e-05	0.0493329	0.00125288	0.000535783	0.0023137	0.000946169	0.000248574	0.00269677	0	0.0765722	0	0	0		11.9115	47.981	0.0335783	0.0995755	0.027323	0.0817151	0.00154823	0.134189			39.5469	0.0487452		6.84805e-05	0.0493329	0.00125288	0.000535783	0.0023137	0.000946169	0.000248574	0.00269677
4.35	Line_8_88	11.9317	47.9795	0	0.081221	0.0194559	0.096757	0.0018962	0.0987195	0.00661875	0	39.6441	0.00922504	0	0.000221369	0.0454276	0.00056595	0.00223795	0.00108489	0.000561444	0.000891564	0.00216385	0	0.0775391	0	0	0		11.9317	47.9795		0.081221	0.0194559	0.096757	0.0018962	0.0987195	0.00661875		39.6441	0.00922504		0.000221369	0.0454276	0.00056595	0.00223795	0.00108489	0.000561444	0.000891564	0.00216385
4.4	Line_8_89	11.9248	47.9783	0	0.0741758	0.0249681	0.11555	0.00187056	0.103126	0.00747929	0	39.6322	0	0.00302084	0.00134463	0.038139	0.00204488	0.00453721	0	0	0.00321001	0.00177751	0	0.0783188	0	0.00498952	0.000236566		11.9248	47.9783		0.0741758	0.0249681	0.11555	0.00187056	0.103126	0.00747929		39.6322		0.00302084	0.00134463	0.038139	0.00204488	0.00453721			0.00321001	0.00177751
4.45	Line_8_90	11.8914	47.9888	0.00810568	0.0450111	0.0290998	0.106631	0.0021559	0.201681	0.00740378	0	39.5685	0	0.00687675	9.38641e-06	0.0339454	0.00154282	0.00542258	0	7.49799e-05	0.00586379	0.00205815	0	0.0790888	0	0.013333	0.00304643		11.8914	47.9888	0.00810568	0.0450111	0.0290998	0.106631	0.0021559	0.201681	0.00740378		39.5685		0.00687675	9.38641e-06	0.0339454	0.00154282	0.00542258		7.49799e-05	0.00586379	0.00205815
4.5	Line_8_91	11.858	48.0303	0	0.0389059	0.031905	0.0868827	0.00193035	0.33463	0.00366615	0	39.4667	0	0.00691506	0.00013334	0.0284287	0.00335804	0.00449247	0	0.000131175	0.00446331	0.00145576	0	0.0801512	0	0.012108	0.00547172		11.858	48.0303		0.0389059	0.031905	0.0868827	0.00193035	0.33463	0.00366615		39.4667		0.00691506	0.00013334	0.0284287	0.00335804	0.00449247		0.000131175	0.00446331	0.00145576
4.55	Line_8_92	11.8693	47.9914	0.0703807	0.0582214	0.0268078	0.0929612	0.00199319	0.260861	0.00816247	0	39.4725	0	0.00709709	0.000750626	0.0238782	0.00474683	0.00949773	0	0	0.00535577	0.00243127	0	0.0804256	0	0.010155	0.00298139		11.8693	47.9914	0.0703807	0.0582214	0.0268078	0.0929612	0.00199319	0.260861	0.00816247		39.4725		0.00709709	0.000750626	0.0238782	0.00474683	0.00949773			0.00535577	0.00243127
[truncated: 113 more rows]
[truncated: 63 more columns]

## Sheet: M6 Trecon
MAX		0.00927299	0.00112569	-27.9761	13.1986	36.1963	23.41	14.1471	6.75356	38.7956	48.5405	28.8103	-10.8942	5.57133	1.57649				-0.936701			22.7024			Hays and Grossman, 1991
[truncated: 210 more rows]

[truncated: 2 more sheets: M0, M0 Trecon]
