# Supplementary material for: An assessment of latest Cretaceous Pycnodonte vesicularis (Lamarck, 1806) shells as records for palaeoseasonality: a multi-proxy investigation
Source: Copernicus journal article supplement (doi:10.5194/cp-14-725-2018), 2018-06-08
Supplement: Supplementary file [file cp-14-725-2018-supplement-title-page.pdf › cp-14-725-2018-supplement-title-page.pdf]

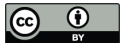

## *Supplement of*

# **An assessment of latest Cretaceous *Pycnodonte vesicularis* (Lamarck, 1806) shells as records for palaeoseasonality: a multi-proxy investigation**

Niels J. de Winter et al.

Correspondence to: Niels J. de Winter (niels.de.winter@vub.be)

- cp-14-725-2018-supplement-title-page.pdf
- supplementary
  - SI1\_TEX86.xlsx
  - SI2\_CT.docx
  - SI3\_CT.pdf
  - SI4\_XRF.docx
  - SI5\_clumped.docx
  - SI6\_CL.tif
  - SI7\_XRFmaps
    - \* M0 Ca HM.jpg
    - \* M0 FeMn HM.jpg
    - \* M0 MnSiCa.jpg
    - \* M0 S HM.jpg
    - \* M0 Sr HM.jpg
    - \* M10 Ca HM.jpg
    - \* M10 FeMn HM.jpg
    - \* M10 MnSiCa.jpg
    - \* M10 S HM.jpg
    - \* M10 Sr HM.jpg
    - \* M4 Ca HM.jpg
    - \* M4 FeMn HM.jpg
    - \* M4 MnSiCa.jpg
    - \* M4 S HM.jpg
    - \* M4 Sr HM.jpg
    - \* M6 Ca HM.jpg
    - \* M6 FeMn HM.jpg

- \* M6 MnSiCa.jpg
- \* M6 S HM.jpg
- \* M6 Sr HM.jpg
- SI8\_T\_yearstack.xlsx

The copyright of individual parts of the supplement might differ from the CC BY 4.0 License.
